# Supplementary material
Source: publisher figshare collection journal article supplement (https://acs.figshare.com/ndownloader/files/3736678)
Supplement: Supplementary file 1 [file 3736678]

## Sheet: Header
Header	Description
Protein Id	Yeas OLN Identification Number
Gene Symbol	Gene Identifier
Description	Protein name and description
# Quantified Peptides	Number of peptides used for overall protein quantification
Relative Abundance	Scaled protein expression data. Raw TMT s/n for each protein was summed and each individual measurement was divided by the sum and multiplex by 100.

## Sheet: YeastKOData
Protein Id	Gene Symbol	Description	# Quantified Peptides			Replicate #1 Relative Abundance											Replicate #2 Relative Abundance											Replicate #3 Relative Abundance
			Rep #1	Rep #2	Rep #3	WT	UBP3Δ	DOA4Δ	UBP6Δ	UBP8Δ	UBP10Δ	UBP14Δ	UBP15Δ	OTU1Δ	OTU2Δ	Sum	WT	UBP3Δ	DOA4Δ	UBP6Δ	UBP8Δ	UBP10Δ	UBP14Δ	UBP15Δ	OTU1Δ	OTU2Δ	Sum	WT	UBP3Δ	DOA4Δ	UBP6Δ	UBP8Δ	UBP10Δ	UBP14Δ	UBP15Δ	OTU1Δ	OTU2Δ	Sum
						126	127N	127C	128N	128C	129N	129C	130N	130C	131	SN	126	127N	127C	128N	128C	129N	129C	130N	130C	131	SN	126	127N	127C	128N	128C	129N	129C	130N	130C	131	SN
YJR124C	YJR124C	Putative protein of unknown function; expression induced under calcium shortage	2	1	2	7.96712	11.2932	9.63532	6.67052	8.31989	9.36256	9.59946	8.50675	9.55684	10.0115	1628.79	6.21383	9.2097	6.69455	7.44722	8.0392	11.144	9.39796	7.22655	10.5844	14.9794	2124.88	8.411	13.066	8.58	6.9877	8.14738	10.2424	9.06784	9.03056	8.34194	9.06008	8271.8
YPL111W	CAR1	Arginase, responsible for arginine degradation, expression responds to both induction by arginine and nitrogen catabolite repression; disruption enhances freeze tolerance	15	23	25	10.3462	12.8257	9.6682	6.74765	9.01624	5.62637	8.86328	12.1838	8.77754	6.80997	44335.1	10.8404	13.3204	9.83205	6.75325	9.04072	5.39928	8.74568	11.8269	8.73365	6.4778	56715.3	10.5101	13.4431	10.0991	6.89403	8.76323	5.45488	8.66666	11.9595	8.67139	6.46885	63648.8
YLR438C-A	LSM3	Lsm (Like Sm) protein; part of heteroheptameric complexes (Lsm2p-7p and either Lsm1p or 8p): cytoplasmic Lsm1p complex involved in mRNA decay; nuclear Lsm8p complex part of U6 snRNP and possibly involved in processing tRNA, snoRNA, and rRNA	3	2	2	9.10535	12.4566	7.92844	7.00135	8.29755	12.177	8.16387	9.55412	7.82396	8.41817	3001.16	6.92243	9.49003	9.05863	9.76709	9.3866	10.2649	9.43181	9.01998	9.59391	7.92975	1851.26	10.36	13.6393	7.01144	6.46533	8.16522	14.5501	8.74938	7.58693	7.53348	6.89568	2676.46
YPR133W-A	TOM5	Component of the TOM (translocase of outer membrane) complex responsible for recognition and initial import of all mitochondrially directed proteins; involved in transfer of precursors from the Tom70p and Tom20p receptors to the Tom40p pore	2	2	1	8.89196	9.69882	9.7707	8.41943	9.07435	8.73519	9.27637	8.90753	9.47667	8.65389	4295.38	8.2062	9.23779	9.54588	7.875	10.2762	8.76677	8.18607	8.30527	10.65	9.86551	463.796	9.50535	8.14507	8.82636	9.1898	10.4144	8.29682	9.03913	7.31252	10.3919	9.77923	415.23
YDR427W	RPN9	Non-ATPase regulatory subunit of the 26S proteasome, has similarity to putative proteasomal subunits in other species; null mutant is temperature sensitive and exhibits cell cycle and proteasome assembly defects	24	23	27	7.79356	7.50314	9.98719	9.257	8.93657	8.39323	9.87773	8.68277	10.2045	10.284	55697.9	8.02662	7.88913	10.0647	9.33416	8.84006	8.46853	9.45427	8.94135	9.78928	10.1039	61770.1	7.54134	7.66509	9.55072	9.60815	8.72051	9.04793	9.03292	8.6853	10.0525	10.9937	72839.1
YJR025C	BNA1	3-hydroxyanthranilic acid dioxygenase, required for the de novo biosynthesis of NAD from tryptophan via kynurenine; expression regulated by Hst1p	14	10	10	8.42825	16.5599	8.66585	6.08363	13.9377	5.91713	11.0862	8.51844	6.79763	4.82719	26549.3	8.73955	15.3697	8.87587	6.41518	14.2147	5.86077	10.1207	8.86719	7.21714	5.25533	14478.5	8.49094	15.6656	8.45805	6.49612	13.427	6.40249	10.7173	8.97361	7.39117	4.93246	32078.5
YLR066W	SPC3	Subunit of signal peptidase complex (Spc1p, Spc2p, Spc3p, Sec11p), which catalyzes cleavage of N-terminal signal sequences of proteins targeted to the secretory pathway; homologous to mammalian SPC22/23	7	11	9	8.41105	13.7279	8.43453	8.4914	8.3766	9.48372	9.17228	8.31156	8.32889	8.15368	12458.9	8.40767	14.3057	8.51855	8.34505	8.44053	9.83445	8.77014	8.03112	8.10761	8.13779	17343.8	8.4176	13.6935	8.27467	8.6182	8.15203	10.0483	8.72115	8.12368	8.45312	8.41036	12879.8
YGR285C	ZUO1	Ribosome-associated chaperone, functions in ribosome biogenesis and, in partnership with Ssz1p and SSb1/2, as a chaperone for nascent polypeptide chains; contains a DnaJ domain and functions as a J-protein partner for Ssb1p and Ssb2p	51	55	46	10.5538	10.543	8.0135	9.11594	8.43929	10.7402	8.23854	8.12346	8.34895	8.79701	126751	10.4541	10.6761	7.93462	8.98327	8.58567	10.9532	8.35338	8.10914	8.10569	8.74246	125231	10.9435	10.7326	7.70105	8.95024	8.371	10.9049	8.65651	7.89351	8.30516	8.45002	119615
YER044C	ERG28	Endoplasmic reticulum membrane protein, may facilitate protein-protein interactions between the Erg26p dehydrogenase and the Erg27p 3-ketoreductase and/or tether these enzymes to the ER, also interacts with Erg6p	6	4	5	7.41213	12.5069	9.59378	8.13797	10.2019	9.11266	9.64626	8.3929	8.66433	7.21628	15526.6	7.02434	12.9042	10.2673	7.57269	11.3033	9.1115	9.35597	7.98899	8.68283	6.67479	9851.58	6.81416	13.3785	10.3065	8.32406	10.3227	9.02547	8.89996	8.48611	8.29534	7.07928	15206.5
YDR487C	RIB3	3,4-dihydroxy-2-butanone-4-phosphate synthase (DHBP synthase), required for riboflavin biosynthesis from ribulose-5-phosphate, also has an unrelated function in mitochondrial respiration	20	19	16	9.90535	14.2033	8.19699	8.07257	8.18307	8.97222	8.14521	8.7594	8.44738	8.0045	69677.1	10.7986	14.2366	8.34081	7.98353	7.8788	9.00472	8.26032	8.49394	8.33258	7.5936	58639	10.4125	14.2031	8.72806	7.95925	7.97138	8.9017	8.16991	8.61739	8.24679	7.70515	78856.4
YHR072W-A	NOP10	Constituent of small nucleolar ribonucleoprotein particles containing H/ACA-type snoRNAs, which are required for pseudouridylation and processing of pre-18S rRNA	14	13	12	11.2134	10.5293	7.83123	8.29642	7.99562	10.5645	8.55821	9.00284	8.46002	8.46295	32585	10.9512	10.05	8.24133	7.74771	8.63463	10.1779	9.36925	8.98111	8.51365	8.25918	40122.3	10.8287	9.60285	7.9159	8.29627	8.39595	9.77672	9.3757	9.12659	8.90942	8.68667	44275.7
YGR267C	FOL2	GTP-cyclohydrolase I, catalyzes the first step in the folic acid biosynthetic pathway	12	13	16	9.56971	12.0938	8.0752	8.82849	8.84206	10.1763	8.00847	8.81682	7.87829	8.61454	36337.1	10.5304	12.0369	7.49975	7.58638	10.5316	9.75964	10.0363	8.02126	7.96742	6.94756	27323.8	10.4549	12.3731	7.74134	7.4488	10.2349	9.5506	10.1343	8.08889	8.21706	6.68963	47926.1
YGL040C	HEM2	Aminolevulinate dehydratase, a homo-octameric enzyme, catalyzes the conversion of 5-aminolevulinate to porphobilinogen, the second step in heme biosynthesis; enzymatic activity is zinc-dependent; localizes to the cytoplasm and nucleus	23	18	20	9.36878	8.77677	10.2759	9.74901	9.62164	8.36235	8.85249	8.57453	8.94554	8.36555	38574.7	9.28136	8.72167	10.9302	9.28978	9.9022	7.96201	9.28304	8.63342	8.88825	8.01356	35910.8	9.70115	8.88354	9.97203	9.62085	9.41268	8.45538	8.99336	8.50833	8.80381	8.55091	47127.8
YKL079W	SMY1	Protein that interacts with Myo2p, proposed to be involved in exocytosis; N-terminal domain is related to the motor domain of kinesins	14	18	20	9.37811	9.29873	9.54005	9.17569	9.58963	9.18993	9.32626	9.03217	8.42619	7.93782	26509.9	8.87118	9.02955	8.98876	9.18573	9.76904	9.50343	9.18738	8.99149	8.7753	8.59584	24044.7	9.19013	9.19092	9.1446	9.58737	9.42765	9.3813	8.92315	8.8474	8.63325	8.58104	38190.9
YBR172C	SMY2	Protein of unknown function involved in COPII vesicle formation; interacts with the Sec23p/Sec24p subcomplex; overexpression suppresses the temperature sensitivity of a myo2 mutant; has similarity to S. pombe Mpd2	21	21	28	9.23026	13.1739	8.47116	9.63016	7.55299	8.90312	8.87675	8.61998	8.52994	7.89592	27175.8	9.30265	13.0891	8.38165	9.51746	7.70283	9.19641	8.1779	8.57183	8.6004	8.35781	37366.2	9.08646	12.7836	8.93802	9.73208	7.54154	8.93425	8.07391	8.79169	8.64122	8.37122	54453.8
YDR329C	PEX3	Peroxisomal membrane protein (PMP) required for proper localization and stability of PMPs; anchors peroxisome retention factor Inp1p at the peroxisomal membrane; interacts with Pex19p	6	2	6	6.14561	8.77576	8.08037	10.3031	8.38145	10.3331	10.0877	9.13901	9.26072	10.421	9721.6	6.67219	8.52303	8.37217	9.33631	9.88982	11.0678	9.75854	8.4022	9.2429	9.60964	1404.84	6.04084	9.39492	8.62629	10.1655	9.37926	10.1962	10.4821	8.74612	9.10463	8.7708	10206.9
YNR032C-A	HUB1	Ubiquitin-like protein modifier; promotes alternative splicing of SRC1 pre-mRNA; binds non-covalently to the HIND domain of Snu66, may function in modification of Sph1p and Hbt1p, functionally complemented by the human or S. pombe ortholog; mechanism of Hub1p adduct formation not yet clear	2	5	3	10.06	11.2172	8.22694	7.66274	9.50496	10.9281	7.98028	8.36243	8.70154	8.27386	4027.08	9.08946	11.1668	7.68298	8.05769	9.71171	10.7758	7.92859	7.86974	8.75093	9.87038	7571.52	10.1426	9.75958	7.97753	8.64037	8.98973	10.5474	8.9462	8.6368	9.09676	8.1806	2077.92
YGR030C	POP6	Subunit of both RNase MRP and nuclear RNase P; RNase MRP cleaves pre-rRNA, while nuclear RNase P cleaves tRNA precursors to generate mature 5' ends and facilitates turnover of nuclear RNAs	5	4	5	8.96947	17.282	7.35983	8.26181	7.14846	8.38495	8.8173	8.55031	7.86975	8.23115	10158.7	8.97272	16.8604	7.45798	8.41138	7.54778	8.30715	8.78803	8.03962	8.47628	8.05815	4488.59	9.24723	16.0554	8.45193	8.0642	8.15626	8.00788	9.10414	7.9244	7.90885	7.98854	9618.19
YCR043C	YCR043C	Putative protein of unknown function; green fluorescent protein (GFP)-fusion protein localizes to the Golgi apparatus; YCR043C is not an essential gene	6	1	1	7.25881	10.7053	7.54417	8.68731	7.08264	10.8238	9.23553	9.56966	9.70698	10.3248	6828.36	6.59137	12.1943	8.04915	8.38627	7.83573	10.7363	7.77184	9.32175	9.32375	10.6849	4233.54	8.31484	11.0033	8.98661	9.2279	7.32146	9.88128	8.90653	8.25136	8.52187	10.4835	1875.57
YML031W	NDC1	Nuclear envelope protein with multiple putative transmembrane domains, required for nuclear pore complex assembly and spindle pole body duplication; required for meiosis II	8	11	12	5.83211	9.05627	8.53348	9.41816	6.90063	11.2963	8.39567	8.11364	9.58149	13.8408	16652.7	6.645	8.74377	8.67996	8.86825	7.03192	10.5092	9.85002	8.00238	9.35281	13.2366	21463.3	6.8484	8.23339	8.50895	8.93169	7.10296	10.8594	9.24483	7.97864	9.97823	13.2125	27175.3
YLR196W	PWP1	Protein with WD-40 repeats involved in rRNA processing; associates with trans-acting ribosome biogenesis factors; similar to beta-transducin superfamily	31	35	34	10.8252	10.9315	7.88213	9.04658	7.84529	10.9559	8.52772	8.19345	8.21328	8.49032	83894.5	11.3236	11.1775	7.91784	8.73688	8.13331	10.8346	8.3965	8.01054	8.13786	8.23624	96407.9	10.8669	11.5436	7.71689	9.04465	7.74244	11.2304	7.95248	8.26984	7.9104	8.62954	76140.5
YLR021W	IRC25	Component of a heterodimeric Poc4p-Irc25p chaperone involved in assembly of alpha subunits into the 20S proteasome; may regulate formation of proteasome isoforms with alternative subunits under different conditions	0	1	2	0	0	0	0	0	0	0	0	0	0	0	9.49082	12.2916	8.04213	7.97674	9.83494	10.2682	8.45804	9.09423	8.03433	7.4084	2057.83	9.856	11.8742	7.9493	8.48827	9.38688	10.1333	8.1398	8.6515	8.20272	8.23727	6671.01
YPR097W	YPR097W	Protein that contains a Phox homology (PX) domain and binds phosphoinositides; the authentic, non-tagged protein is detected in highly purified mitochondria in high-throughput studies	21	29	25	8.93493	8.86402	9.38289	8.64867	8.87323	8.86288	9.73003	9.17437	8.9684	9.47051	26343.5	8.7277	8.62439	9.08681	8.91872	8.89681	9.6693	9.04972	8.64919	8.93262	10.3572	65000.1	8.85113	8.40313	8.93871	9.00813	8.56179	9.94629	8.44384	8.86162	9.24526	10.6473	48603.1
YKL218C	SRY1	3-hydroxyaspartate dehydratase, deaminates L-threo-3-hydroxyaspartate to form oxaloacetate and ammonia; required in the presence of hydroxyaspartate; highly similar to mouse serine racemase (Srr) but has no serine racemase activity	3	4	5	9.83913	10.8224	9.44315	9.90056	9.72934	7.00176	10.7622	9.26242	7.34661	6.74308	3987.12	9.47025	9.47839	9.45388	9.52834	9.18008	7.80379	9.81608	9.08174	8.62678	8.47813	3169.75	9.62996	11.8366	8.36447	9.26947	10.2484	7.76357	10.1436	8.47085	7.33889	7.83932	13023
YOR210W	RPB10	RNA polymerase subunit ABC10-beta, common to RNA polymerases I, II, and III	2	7	9	9.70941	10.2773	8.61404	9.09039	7.90702	9.48463	7.51833	10.8241	8.11037	9.37705	9444.46	10.9735	9.71317	8.9784	8.65878	8.71286	8.56597	8.91564	9.38241	8.58548	8.44317	28139.2	11.4138	9.49145	9.31388	7.60756	8.93813	8.26439	9.55266	8.74559	9.16536	8.42675	34537.6
YGL031C	RPL24A	Ribosomal protein L30 of the large (60S) ribosomal subunit, nearly identical to Rpl24Bp and has similarity to rat L24 ribosomal protein; not essential for translation but may be required for normal translation rate	6	5	6	10.5481	9.77601	9.09799	8.33934	8.60917	7.4526	9.63071	9.91266	9.12436	8.40017	23564.2	10.714	9.01832	9.35781	11.0298	7.8494	6.60851	9.08974	9.89838	8.98572	8.36802	22063.7	10.4096	9.10165	9.59978	11.3628	7.88727	6.33396	9.16811	9.87277	8.78321	8.3484	19584.5
YGR148C	RPL24B	Ribosomal protein L30 of the large (60S) ribosomal subunit, nearly identical to Rpl24Ap and has similarity to rat L24 ribosomal protein; not essential for translation but may be required for normal translation rate	3	7	5	11.6855	10.5924	10.1291	8.19351	8.75634	6.02822	9.80093	9.54698	9.18861	6.94262	14261.3	10.6727	9.79602	10.126	9.5874	8.97707	6.40113	9.19404	9.29651	9.10716	7.77128	16287	10.0525	9.59436	9.35582	11.4854	7.83519	6.71271	8.66183	9.85373	8.9488	8.36683	16189.2
YPR149W	NCE102	Protein of unknown function; contains transmembrane domains; involved in secretion of proteins that lack classical secretory signal sequences; component of the detergent-insoluble glycolipid-enriched complexes (DIGs)	3	2	2	7.43713	8.40472	8.86821	8.59609	10.7756	9.08455	10.8172	9.5179	9.37192	8.03041	1553.11	8.2483	9.03481	10.2007	8.77232	10.6545	8.83281	10.3121	9.45232	8.54772	6.83835	6128.81	7.4733	9.14129	10.4772	8.72715	11.4486	9.02998	10.1478	9.46078	8.41173	6.61912	4892.47
YDR023W	SES1	Cytosolic seryl-tRNA synthetase, class II aminoacyl-tRNA synthetase that aminoacylates tRNA(Ser), displays tRNA-dependent amino acid recognition which enhances discrimination of the serine substrate, interacts with peroxin Pex21p	59	49	51	10.0203	8.59243	9.16605	9.77175	7.74662	9.24621	8.64716	8.97462	9.36405	9.38472	126902	10.4421	8.63535	9.60927	9.45767	7.76031	8.87046	8.92132	9.05444	9.31074	8.85369	108548	10.2417	8.80468	9.87351	9.44123	7.88421	8.69127	8.84454	9.07035	9.2328	8.81425	118446
YER056C	FCY2	Purine-cytosine permease, mediates purine (adenine, guanine, and hypoxanthine) and cytosine accumulation	6	5	6	8.87594	9.48085	20.2961	7.29762	6.95462	9.53413	7.48551	5.41308	8.12023	7.4257	11294.3	8.64382	9.36935	22.1365	6.59414	6.90107	8.79376	7.81498	5.62202	8.03514	6.98199	10078.3	8.67492	9.50631	20.993	6.6684	7.01589	9.35837	7.22256	5.26537	8.44644	7.7985	12500.1
YLL040C	VPS13	Protein of unknown function; heterooligomeric or homooligomeric complex; peripherally associated with membranes; homologous to human COH1; involved in sporulation, vacuolar protein sorting and protein-Golgi retention	68	86	84	7.59959	6.49514	10.4232	9.42703	9.70706	8.14682	10.0628	10.0619	9.89975	9.08624	114336	7.75836	6.39814	10.6921	9.40371	9.81074	7.80715	9.96116	10.1778	9.83419	9.06639	183073	7.7509	6.29727	10.8615	9.19813	9.82329	7.68658	10.0727	10.0983	9.94779	9.17689	188576
YOL158C	ENB1	Endosomal ferric enterobactin transporter, expressed under conditions of iron deprivation; member of the major facilitator superfamily; expression is regulated by Rcs1p and affected by chloroquine treatment	6	8	8	10.3504	4.06323	13.5587	12.7069	6.62417	8.41835	7.08709	6.72789	8.86029	12.5241	9783.05	11.7759	3.78529	14.9694	12.19	7.26114	5.94791	8.64168	6.62258	8.85266	10.8739	12852.6	9.99442	5.83609	12.7157	11.1933	7.63562	7.84201	8.54624	7.52205	8.8092	10.7762	20813
YGR130C	YGR130C	Component of the eisosome with unknown function; GFP-fusion protein localizes to the cytoplasm; specifically phosphorylated in vitro by mammalian diphosphoinositol pentakisphosphate (IP7)	31	38	32	8.25548	10.8989	9.76613	10.8518	8.8146	8.07191	9.65355	9.04107	8.44326	7.07188	71156.3	8.47381	10.1281	9.56167	11.4716	9.11466	8.46177	9.17651	8.26035	8.91414	7.3026	77978.1	8.18934	10.9108	9.33633	11.1789	9.01466	8.53289	9.26783	8.92988	8.52631	7.00121	88357.6
YNR035C	ARC35	Subunit of the ARP2/3 complex, which is required for the motility and integrity of cortical actin patches; required for cortical localization of calmodulin	14	16	16	8.60573	10.5559	11.1498	9.62852	8.16857	8.7984	8.52064	8.33541	8.89378	8.23458	39776.7	8.57504	10.9996	10.4232	9.39735	8.24286	8.6799	8.8412	8.7717	8.42278	8.54661	41677.1	8.83535	10.8239	9.77888	9.27067	8.24005	8.98936	9.44147	8.66822	8.72216	8.13594	41735.8
YJR062C	NTA1	Amidase, removes the amide group from N-terminal asparagine and glutamine residues to generate proteins with N-terminal aspartate and glutamate residues that are targets of ubiquitin-mediated degradation	6	9	12	7.66936	7.69471	9.37483	10.8297	9.11201	8.4478	9.62382	9.03311	9.0362	10.0851	11067.7	8.11051	7.48391	9.89584	10.3616	9.57989	8.1217	9.54005	8.72441	9.37714	9.70405	18124.5	7.83078	7.37548	10.0913	10.2865	9.53274	7.79908	10.0279	8.30026	9.6073	10.0388	24796.5
YHR144C	DCD1	Deoxycytidine monophosphate (dCMP) deaminase required for dCTP and dTTP synthesis; expression is NOT cell cycle regulated	6	6	6	9.78424	10.8495	8.89036	7.68933	10.5847	8.04194	8.17873	9.17311	8.83837	8.86902	9500.56	10.1038	10.3176	9.41346	8.21777	10.0713	8.19789	8.21159	9.06132	8.75054	8.57952	11431.5	9.85872	11.2315	8.91871	7.35941	10.2988	8.23469	8.50661	8.98378	8.87055	8.66644	11185.7
YDL086W	YDL086W	Putative protein of unknown function; the authentic, non-tagged protein is detected in highly purified mitochondria in high-throughput studies; YDL086W is not an essential gene	12	14	13	8.60515	12.3314	9.14736	10.181	8.8715	7.69234	9.62404	8.90386	8.45765	7.05045	12146.6	8.61775	12.7569	9.02456	10.4367	8.78655	7.77915	9.44082	9.16573	7.90586	6.97586	16233.3	8.66886	11.9323	9.44895	10.2283	8.76052	7.57761	9.63026	8.84741	8.53238	7.26558	22738.9
YHR012W	VPS29	Endosomal protein that is a subunit of the membrane-associated retromer complex essential for endosome-to-Golgi retrograde transport; forms a subcomplex with Vps35p and Vps26p that selects cargo proteins for endosome-to-Golgi retrieval	6	13	10	9.12903	9.10789	9.61463	8.92642	9.3567	8.06405	9.80223	8.83843	9.34484	8.71277	17583.9	9.50936	8.96563	9.73726	8.71383	9.52953	7.70178	9.66208	8.84416	9.39493	8.86945	36328.3	8.89692	8.51881	8.65815	8.56941	9.27668	7.90649	8.82996	8.97599	12.7364	8.53931	41720
YKR093W	PTR2	Integral membrane peptide transporter, mediates transport of di- and tri-peptides; conserved protein that contains 12 transmembrane domains; PTR2 expression is regulated by the N-end rule pathway via repression by Cup9p	9	10	11	8.29894	8.43307	14.7308	6.43684	8.46673	8.90937	3.64907	13.6293	9.43485	8.94441	7733.51	8.93495	8.91412	13.7763	5.91675	8.5789	8.51669	4.45884	13.1074	9.79823	8.92895	20897.5	8.52347	8.48353	14.065	5.07267	8.53052	9.97583	3.42406	14.3121	9.33842	9.25911	23468.4
YBR041W	FAT1	Very long chain fatty acyl-CoA synthetase and long chain fatty acid transporter; activates imported fatty acids with a preference for very long lengths (C20-C26); has a separate function in the transport of long chain fatty acids	15	12	10	7.20745	8.60464	10.7386	9.54695	8.38602	9.14223	10.3804	8.78582	8.96274	9.14945	38977.9	7.34577	8.16395	11.7025	8.91538	8.63798	8.59725	10.9575	8.18398	9.53299	8.86774	22271.4	7.39789	8.43545	10.9987	9.4545	8.64439	8.96194	10.6834	8.45134	8.96588	8.91486	42921.5
YGL234W	ADE5,7	Bifunctional enzyme of the 'de novo' purine nucleotide biosynthetic pathway, contains aminoimidazole ribotide synthetase and glycinamide ribotide synthetase activities	64	70	68	10.381	6.29989	9.25881	10.8034	8.8275	8.58297	9.68239	9.32139	8.39905	9.34436	121517	10.5512	6.44276	9.38754	10.821	8.7028	8.61859	9.24495	9.14522	8.61891	9.3739	161344	10.8425	6.28775	9.19261	10.9782	8.71985	8.46152	9.5053	9.17614	8.25187	9.46464	184215
YER112W	LSM4	Lsm (Like Sm) protein; part of heteroheptameric complexes (Lsm2p-7p and either Lsm1p or 8p): cytoplasmic Lsm1p complex involved in mRNA decay; nuclear Lsm8p complex part of U6 snRNP and possibly involved in processing tRNA, snoRNA, and rRNA	10	12	13	9.35179	12.3775	8.87029	8.88812	8.62383	8.91362	8.90843	8.61262	8.28139	8.05986	17805.1	9.20266	12.5665	8.85865	8.67345	8.16571	9.12834	8.65576	8.36484	9.11219	8.17802	28497.8	9.12848	12.247	8.95969	9.07799	8.64187	9.14237	8.59102	8.4759	8.62726	8.016	29558.8
YOL125W	TRM13	2'-O-methyltransferase responsible for modification of tRNA at position 4; C-terminal domain has similarity to Rossmann-fold (RFM) superfamily of RNA methyltransferases	3	5	6	8.24399	8.85236	8.26624	7.81372	9.1742	11.5378	8.15018	8.45113	9.09394	11.3711	3185.84	8.68413	8.63917	8.4957	8.25031	9.89397	10.2824	8.04164	8.82412	9.08572	10.7139	4769.53	8.22018	9.06618	8.405	7.86841	9.99951	10.2472	8.26233	8.46152	8.8898	11.5045	4735.03
YMR278W	PGM3	Phosphoglucomutase, catalyzes interconversion of glucose-1-phosphate and glucose-6-phospate; transcription induced in response to stress; green fluorescent protein (GFP)-fusion protein localizes to the cytoplasm and nucleus; non-essential	16	20	19	7.09923	8.44946	9.42802	10.7466	9.78566	7.74741	10.0554	8.62556	9.84096	9.11715	42045.5	7.08081	8.5124	9.79822	10.6538	9.52657	7.56734	10.0929	8.81931	9.76056	9.07962	49597.9	7.0796	8.52811	9.88872	10.4657	9.4443	7.58331	10.0534	8.88448	9.99994	8.96379	53822.5
YMR237W	BCH1	Member of the ChAPs family (Chs5p-Arf1p-binding proteins: Bch1p, Bch2p, Bud7p, Chs6p), that forms the exomer complex with Chs5p to mediate export of specific cargo proteins from the Golgi to the plasma membrane; may interact with ribosomes	12	11	12	7.79972	4.90737	10.7967	9.60201	10.0045	8.25824	10.3993	9.36851	10.064	9.71644	18749.9	7.35571	5.04408	10.0454	9.54155	10.7506	7.78686	11.421	9.38361	9.86664	9.719	17536.7	8.10455	5.12917	10.2047	9.5649	9.75742	8.60024	10.3232	9.70159	9.62395	9.89895	29479.6
YBR068C	BAP2	High-affinity leucine permease, functions as a branched-chain amino acid permease involved in the uptake of leucine, isoleucine and valine; contains 12 predicted transmembrane domains	11	9	9	7.75924	8.22349	16.7021	8.57606	7.65921	10.1421	8.04721	6.44582	8.20128	9.1494	18322.8	7.64687	7.18179	18.4038	7.7893	8.0432	9.21243	8.38485	6.26839	9.1362	8.82087	17560.9	7.68445	7.87931	18.8038	8.19919	7.63933	8.97607	8.30217	5.66857	9.1437	8.63162	21390.4
YCR095C	OCA4	Cytoplasmic protein required for replication of Brome mosaic virus in S. cerevisiae, which is a model system for studying replication of positive-strand RNA viruses in their natural hosts	5	2	2	9.13077	11.4759	8.20104	8.69177	9.02427	10.6967	8.33533	8.52486	8.21854	8.61182	8707.36	7.67838	10.8002	8.02997	10.0672	9.95687	8.95341	7.99181	9.45811	8.21564	9.73864	2150.87	7.92723	11.3346	8.86928	9.40211	8.72612	10.1338	8.15521	8.76156	8.48767	9.11128	825.382
YOR138C	RUP1	Protein involved in regulation of Rsp5p, which is an essential HECT ubiquitin ligase; has a WW domain consensus motif of PPPSY (residues 131-135) that mediates binding of Rsp5p to Ubp2p; contains an UBA domain	7	9	10	7.75665	9.08346	9.38412	9.92857	9.35404	7.82158	9.45282	9.42528	9.30695	9.38525	10726.7	8.13119	9.00232	9.27863	10.0694	9.1582	7.93157	9.26877	9.21954	9.33966	9.50589	11717.4	8.71781	8.99589	9.61224	9.92833	8.90904	8.04368	9.50686	8.88427	9.09829	9.19796	13934.4
YDR481C	PHO8	Repressible vacuolar alkaline phosphatase; regulated by levels of Pi and by Pho4p, Pho9p, Pho80p, Pho81p and Pho85p; dephosphorylates phosphotyrosyl peptides; contributes to NAD+ metabolism by producing nicotinamide riboside from NMN	11	19	22	7.83535	6.14806	12.7468	10.368	9.1437	3.81016	9.85667	13.4137	11.6346	5.90396	26257	7.93078	5.99314	12.8287	10.5202	8.94633	4.15528	9.57799	13.098	11.6788	6.18202	62651.6	8.48443	6.25489	12.133	10.8656	8.91254	4.76352	8.7254	12.185	11.3646	7.19852	48387.4
YDR247W	VHS1	Cytoplasmic serine/threonine protein kinase; identified as a high-copy suppressor of the synthetic lethality of a sis2 sit4 double mutant, suggesting a role in G1/S phase progression; homolog of Sks1p	1	0	1	8.05798	6.3315	9.18907	9.03653	11.92	6.90619	9.12545	9.17448	11.0228	10.1532	318.254	5.71035	8.23014	11.9813	9.702	8.86018	6.79502	7.42265	9.6791	13.2028	9.30106	0	0	0	0	0	0	0	0	0	0	0	516.924
YCR034W	FEN1	Fatty acid elongase, involved in sphingolipid biosynthesis; acts on fatty acids of up to 24 carbons in length; mutations have regulatory effects on 1,3-beta-glucan synthase, vacuolar ATPase, and the secretory pathway	1	1	2	8.00582	9.63767	10.8592	7.1697	7.95421	8.96418	10.7915	7.53132	9.6451	10.3607	9316.43	11.1699	5.9742	8.94738	8.26504	8.46292	11.1929	8.90969	11.3036	8.66542	8.02097	438.886	6.97487	9.85209	8.59289	8.60003	7.13954	16.2244	6.87673	9.41924	9.60279	7.66426	2836.45
YKL072W	STB6	Protein that binds Sin3p in a two-hybrid assay	5	4	7	8.35685	10.385	8.26035	10.3522	9.424	9.15875	9.63348	7.94005	8.63474	8.74892	4270.97	7.99924	11.1185	8.17811	10.5411	9.11311	9.95965	9.43706	7.85564	8.41814	8.24903	3945.1	8.04237	10.8435	8.56151	11.0544	8.82224	9.80879	9.22783	7.63693	8.02751	8.86008	10659.8
YOL092W	YOL092W	Putative protein of unknown function; predicted to contain six transmembrane domains and is 58% similar to the uncharacterized ORF YBR147W	4	5	4	7.91962	12.0522	7.83047	8.35921	7.48877	11.7887	9.11017	8.58487	8.86707	8.92584	7518.82	7.89042	12.3714	7.74195	8.0512	7.62249	11.5704	9.08414	8.98	8.39509	9.18967	8135.86	7.61989	11.7763	7.53519	8.46421	7.92275	11.7284	8.72746	8.95032	8.84633	9.35058	7334.57
YGL100W	SEH1	Nuclear pore protein of the conserved Nup84p complex (Nup84p, Nup85p, Nup120p, Nup145p, and Seh1p); part of the SEA (Seh1-associated) complex, a coatamer-related complex that associates dynamically with the vacuole; homologous to Sec13p; the Nup84 subcomplex has a role in transcription elongation	17	17	18	9.74671	8.30954	9.41952	9.03162	8.30569	8.74076	9.14388	9.07224	9.15487	9.98999	41695.1	8.82327	8.73316	8.88869	9.21988	8.59837	9.47931	9.5377	9.06897	8.59774	9.96609	37251.1	9.5817	8.15261	8.66608	8.31627	9.22269	9.30903	9.98078	8.64826	9.47577	9.56255	35725.6
YGR240C	PFK1	Alpha subunit of heterooctameric phosphofructokinase involved in glycolysis, indispensable for anaerobic growth, activated by fructose-2,6-bisphosphate and AMP, mutation inhibits glucose induction of cell cycle-related genes	103	95	101	9.04485	4.72687	10.2723	9.4138	10.4826	7.90826	10.0771	9.94351	10.0552	8.98653	212213	8.81999	4.56206	10.0478	10.0682	10.2846	7.7756	9.95638	9.60552	10.2964	9.4937	213514	8.90364	4.81672	9.80774	9.36326	10.6089	7.8053	10.7426	9.95533	9.9429	8.96541	246761
YMR205C	PFK2	Beta subunit of heterooctameric phosphofructokinase involved in glycolysis, indispensable for anaerobic growth, activated by fructose-2,6-bisphosphate and AMP, mutation inhibits glucose induction of cell cycle-related genes	88	73	76	8.45004	4.52672	10.2981	10.3937	10.1551	7.81636	8.5686	9.52678	10.4265	10.7637	213286	8.97484	4.5979	10.517	9.85307	9.81369	7.67735	9.41393	9.69032	10.365	10.0138	156339	8.62775	4.58369	10.4999	9.84317	10.3864	7.78217	9.25854	9.55257	10.1509	10.2171	218283
YGR241C	YAP1802	Protein involved in clathrin cage assembly; binds Pan1p and clathrin; homologous to Yap1801p, member of the AP180 protein family	10	9	10	7.42673	9.2652	9.97615	9.17398	8.8636	9.75818	8.65757	8.88598	9.28457	9.62772	20062.3	8.37282	9.49148	10.1618	8.75083	8.34252	9.44231	9.60693	8.6336	9.14702	8.95581	16816	8.44872	9.70538	9.68214	8.30123	8.64226	9.89954	10.0335	8.85102	8.54906	8.81042	23103.1
YIL004C	BET1	Type II membrane protein required for vesicular transport between the endoplasmic reticulum and Golgi complex; v-SNARE with similarity to synaptobrevins	6	6	6	7.11918	13.5246	7.45123	8.55723	8.62825	9.67363	9.9394	8.22053	8.72564	9.06301	4237.25	6.89243	14.9774	8.08631	9.52925	8.31812	9.39769	9.30526	8.04494	7.77181	8.56195	5843.01	6.5803	15.217	7.75258	9.04255	8.01586	9.56576	9.11255	9.10368	7.69894	8.81929	5085.15
YER026C	CHO1	Phosphatidylserine synthase, functions in phospholipid biosynthesis; catalyzes the reaction CDP-diaclyglycerol + L-serine = CMP + L-1-phosphatidylserine, transcriptionally repressed by myo-inositol and choline	5	3	5	7.63204	8.01459	10.1453	10.769	8.22958	9.32528	10.333	7.7057	9.55332	9.19803	5493.8	8.26199	8.11892	11.1943	10.328	8.20112	9.18824	10.0254	7.56601	8.18073	9.82891	6414.62	8.27365	8.42281	10.3825	11.8166	7.81026	9.27576	10.1601	7.81879	7.61807	9.29506	36813
YOR164C	GET4	Protein with a role in insertion of tail-anchored proteins into the ER membrane; forms a complex with Mdy2p; highly conserved across species and homologous to human gene C7orf20	14	10	12	8.48559	9.16417	8.53107	8.88906	9.3317	8.94283	9.88266	9.02692	9.40686	9.24986	26124.9	8.2984	9.17466	9.06095	9.13933	9.21432	8.73141	9.42732	9.01773	9.80229	9.03977	19784.8	8.37793	9.20793	9.26141	9.17097	8.86657	9.09534	9.48537	9.29938	8.87561	9.2686	29918.7
YLR292C	SEC72	Non-essential subunit of Sec63 complex (Sec63p, Sec62p, Sec66p and Sec72p); with Sec61 complex, Kar2p/BiP and Lhs1p forms a channel competent for SRP-dependent and post-translational SRP-independent protein targeting and import into the ER	8	9	10	9.40455	10.2416	9.39934	9.09101	8.30729	9.65372	9.22515	8.1716	9.32509	8.08373	16339.9	9.18767	10.4178	8.38133	9.23882	8.29188	10.1251	8.68764	8.7086	9.1465	8.70955	20241.9	8.63509	11.0839	8.62043	9.55247	7.93921	10.3281	7.9719	9.32183	8.53584	8.91646	24302.8
YMR292W	GOT1	Homodimeric protein that is packaged into COPII vesicles and cycles between the ER and Golgi; involved in secretory transport but not directly required for aspects of transport assayed in vitro; may influence membrane composition	4	7	4	8.36775	12.9071	7.48039	7.07426	8.60796	11.7191	8.53535	9.49496	8.01992	8.71774	4650.02	7.42923	13.3506	7.25132	6.13653	10.4909	10.4675	10.1264	8.93715	7.37375	9.36648	6605.49	9.42233	10.9488	6.33114	6.37133	9.18977	11.3277	10.4018	8.79823	9.38855	8.76559	6529.98
YKL140W	TGL1	Steryl ester hydrolase, one of three gene products (Yeh1p, Yeh2p, Tgl1p) responsible for steryl ester hydrolase activity and involved in sterol homeostasis; localized to lipid particle membranes	8	13	12	7.12416	8.64213	9.3345	10.2754	8.90063	9.40967	10.9196	9.03978	8.6112	8.64146	14249.9	7.10364	8.1285	9.66131	10.1218	9.36087	9.07034	10.8806	8.95998	9.04696	8.55134	26219	7.20781	8.34051	8.96874	10.1683	9.33958	9.00034	10.9825	8.89496	9.15268	8.84484	25411
YOR175C	ALE1	Broad-specificity lysophospholipid acyltransferase, part of MBOAT family of membrane-bound O-acyltransferases; key component of Lands cycle; may have role in fatty acid exchange at sn-2 position of mature glycerophospholipids	9	14	13	7.88939	8.73128	10.1601	9.03972	8.72988	7.21185	10.0643	8.23416	9.57741	11.2713	25748.7	7.73558	8.82441	9.70149	8.92291	8.39104	7.79923	9.90352	8.8436	9.51961	11.2936	30322.1	7.57583	9.05828	9.95714	8.51585	8.61592	8.15802	10.2238	8.94491	9.16873	10.691	34626.2
YKL166C	TPK3	cAMP-dependent protein kinase catalytic subunit; promotes vegetative growth in response to nutrients via the Ras-cAMP signaling pathway; partially redundant with Tpk1p and Tpk2p; localizes to P-bodies during stationary phase	4	7	10	7.46867	10.5937	8.28882	7.0647	8.9795	10.7678	8.83448	9.34613	9.742	9.85443	3422.85	7.36547	10.4594	7.80795	7.62228	9.02315	11.4552	8.20009	9.50382	9.25206	10.2103	10711.9	7.4489	10.5039	7.14939	7.76229	8.84968	12.1597	8.79066	9.17347	9.23113	9.86526	9624.13
YPL203W	TPK2	cAMP-dependent protein kinase catalytic subunit; promotes vegetative growth in response to nutrients via the Ras-cAMP signaling pathway; partially redundant with Tpk1p and Tpk3p; localizes to P-bodies during stationary phase	5	4	6	5.44344	7.10718	10.6711	10.0957	10.0963	8.62687	8.24467	9.31499	10.6195	10.7099	9061.39	6.18135	6.91461	10.1149	9.62491	9.4455	7.88408	10.4927	9.80037	10.8318	9.61126	3946.95	6.37815	6.22557	11.0591	9.10066	10.8797	7.56905	9.45619	9.47511	10.9659	9.80716	6795.64
YJL164C	TPK1	cAMP-dependent protein kinase catalytic subunit; promotes vegetative growth in response to nutrients via the Ras-cAMP signaling pathway; inhibited by regulatory subunit Bcy1p in the absence of cAMP; partially redundant with Tpk2p and Tpk3p	4	5	5	5.4485	7.18525	11.1551	12.8494	9.9434	6.84888	9.21005	10.6108	9.35168	8.27415	3632.24	6.02045	7.34302	12.2008	11.485	10.8145	5.69207	8.834	10.2524	9.9645	8.26886	6115.9	6.78707	9.51495	11.3065	11.3268	9.35748	6.72615	8.43236	9.65351	9.32247	8.45649	4648.24
YPR175W	DPB2	Second largest subunit of DNA polymerase II (DNA polymerase epsilon), required for normal yeast chromosomal replication; expression peaks at the G1/S phase boundary; potential Cdc28p substrate	8	8	12	7.55222	9.89432	8.08775	8.38592	8.24311	9.78833	8.44574	9.51548	9.721	11.3071	19209.6	8.15005	10.0964	8.31427	8.65421	7.98948	9.89539	8.05287	9.24835	9.85178	10.6578	31099.3	7.80945	9.58899	8.50781	8.19903	8.53367	9.57883	8.5727	8.7245	10.0706	11.3269	35271.1
YKL144C	RPC25	RNA polymerase III subunit C25, required for transcription initiation; forms a heterodimer with Rpc17p; paralog of Rpb7p	5	9	6	8.37389	11.1135	7.61787	8.61447	8.14465	11.2724	8.99239	8.20005	8.82542	9.77472	17593.6	8.15059	11.3565	7.33826	8.08678	9.03353	10.5323	9.47971	7.52155	9.71547	9.69097	34586.9	8.81484	10.5717	8.42498	8.43567	8.95534	9.73989	9.15122	8.00542	9.50277	9.31205	22145.1
YDL205C	HEM3	Porphobilinogen deaminase, catalyzes the conversion of 4-porphobilinogen to hydroxymethylbilane, the third step in heme biosynthesis; localizes to the cytoplasm and nucleus; expression is regulated by Hap2p-Hap3p, but not by levels of heme	6	11	9	9.22663	9.18752	8.28484	7.70272	9.86291	8.76517	9.86143	10.03	9.99249	7.99583	20353.7	7.51974	8.64794	7.61399	8.69637	9.95225	9.46445	10.1845	10.4958	10.5029	7.81858	34003.1	7.85691	8.64124	6.93109	7.86254	10.9872	8.82736	10.8538	11.2723	10.2841	7.42138	32321.6
YPL053C	KTR6	Probable mannosylphosphate transferase involved in the synthesis of core oligosaccharides in protein glycosylation pathway; member of the KRE2/MNT1 mannosyltransferase family	8	6	9	8.17787	7.6236	8.75626	8.97695	8.22988	12.9985	8.15481	6.69242	8.58307	12.7762	28664.9	7.77042	8.13104	9.50973	8.99822	8.88315	11.0339	9.39011	7.23473	8.59013	11.3558	7648.57	7.6895	7.92219	9.15917	9.51564	8.5968	11.4368	9.17588	7.54029	8.53863	11.331	18148.7
YPL156C	PRM4	Pheromone-regulated protein proposed to be involved in mating; predicted to have 1 transmembrane segment; transcriptionally regulated by Ste12p during mating and by Cat8p during the diauxic shift	2	2	1	8.47862	10.702	11.1618	5.94291	6.8537	9.07442	5.07521	9.49286	9.86211	14.3256	4762.27	9.45831	10.4177	7.66602	5.99957	8.86119	9.18391	5.53849	11.1386	9.87145	12.8327	4083.94	9.37568	10.3004	7.92812	7.05254	7.76196	9.52578	5.91539	10.0363	10.2258	12.7961	3049.26
YJL172W	CPS1	Vacuolar carboxypeptidase yscS; expression is induced under low-nitrogen conditions	10	15	10	7.8114	8.96735	9.13087	7.15674	8.39958	12.8933	7.07327	7.93876	8.95987	12.6468	18329	8.02969	8.07115	12.6009	6.32725	8.04119	12.5277	6.76006	6.80699	8.30153	13.4507	25444.2	7.42887	7.75345	13.1265	6.4908	7.92681	11.9104	6.72655	7.53025	8.84785	13.2035	30620.1
YJL133C-A	YJL133C-A	Putative protein of unknown function; the authentic, non-tagged protein is detected in highly purified mitochondria in high-throughput studies	1	2	2	10.7275	7.1318	8.31	9.26393	8.88404	6.8465	9.23332	12.0162	9.51594	8.97171	411.193	7.18531	4.62588	8.8237	10.5672	10.1478	6.29908	10.5501	15.663	9.56567	7.48549	1845.67	7.4327	7.40054	8.10625	9.46811	10.9877	5.5819	10.3487	14.4741	10.4913	6.62714	1422.9
YER064C	YER064C	Non-essential nuclear protein; null mutation has global effects on transcription	2	6	2	8.47528	7.2683	6.79378	9.3902	8.07002	15.9044	5.99766	8.34211	9.21818	11.5387	4109.25	8.40587	7.56024	7.7875	8.77905	9.1297	12.2653	8.32403	10.0689	9.03491	9.52615	8821.33	9.16382	8.2288	7.62021	9.07874	8.99974	11.3792	8.405	9.06383	8.90852	10.0661	2557.64
YIL056W	VHR1	Transcriptional activator, required for the vitamin H-responsive element (VHRE) mediated induction of VHT1 (Vitamin H transporter) and BIO5 (biotin biosynthesis intermediate transporter) in response to low biotin concentrations	3	2	4	8.95981	7.02854	7.91798	7.61507	11.098	7.98581	6.73956	11.3297	11.4237	10.85	2496.2	8.59728	8.22213	7.90874	7.75442	10.2462	8.48134	7.05195	11.0337	10.916	10.7205	2958.96	8.69854	8.38089	7.99743	8.24674	10.2096	8.24555	7.22628	11.0591	10.5334	10.3218	9387.48
YDR530C	APA2	Diadenosine 5',5''-P1,P4-tetraphosphate phosphorylase II (AP4A phosphorylase), involved in catabolism of bis(5'-nucleosidyl) tetraphosphates; has similarity to Apa1p	7	6	7	8.7877	9.65658	9.75776	8.5289	9.56436	6.57539	9.82909	10.471	10.0363	7.6769	18124.7	9.02886	9.66578	9.91594	8.55264	10.2385	6.02344	9.07424	10.6378	9.82548	7.97213	21291.8	8.86296	9.683	10.1785	9.13944	9.70998	6.283	8.90836	10.4846	10.0896	7.56816	29258.7
YKL084W	HOT13	Zinc-binding mitochondrial intermembrane space (IMS) protein involved in a disulfide relay system for IMS import of cysteine-containing proteins; binds Mia40p and stimulates its Erv1p-dependent oxidation, probably by sequestering zinc	4	1	2	10.2488	8.30021	9.43404	8.72771	12.9161	8.57939	7.55853	8.11627	7.82092	9.1973	4471.8	10.5369	9.05767	9.82472	7.19797	13.6974	8.71086	7.38763	8.46565	7.44849	8.59518	3207.89	10.5011	8.82087	9.98665	7.88237	12.4861	8.70446	7.07092	8.36277	7.23807	9.879	3272.55
YBR028C	YPK3	An AGC kinase phosphorylated by cAMP-dependent protein kinase (PKA) in a TORC1-dependent manner	5	7	6	9.36673	7.03565	8.92427	8.96573	8.02205	10.6044	9.68554	10.316	9.13411	8.87291	8975.45	8.93178	6.70342	8.88469	9.32525	8.13576	10.849	8.31817	10.7689	9.15095	9.82898	19354.6	9.5569	6.82687	8.46834	8.45152	8.50871	10.0684	10.961	9.49456	9.6548	8.92792	9613.87
YJL047C	RTT101	Cullin subunit of a Roc1p-dependent E3 ubiquitin ligase complex with a role in anaphase progression; implicated in Mms22-dependent DNA repair; involved with Mms1p in nonfunctional rRNA decay; modified by the ubiquitin-like protein, Rub1p	1	6	4	6.85494	9.75175	6.8837	10.1242	9.4282	9.90408	10.0943	7.83994	9.17297	10.8697	296.754	7.80421	8.11502	8.18129	9.06273	9.76531	10.727	8.62681	9.77861	8.04674	10.7912	2762.08	6.71178	8.25099	8.41392	9.11354	10.0769	10.7427	8.53313	9.00949	9.78255	10.2843	1606.32
YER128W	VFA1	Protein that interacts with Vps4p and has a role in vacuolar sorting; localizes to endosomes in a Vps4-dependent manner; overexpression causes canavanine sensitivity and confers a partial class D vacuole morphology	3	0	2	8.14524	14.623	8.46465	9.35292	9.23824	8.4454	8.18491	8.28309	8.84269	7.29602	2567.85	8.89891	14.5237	8.47499	8.26234	9.23034	9.35796	7.18507	9.01837	8.41068	7.5329	0	0	0	0	0	0	0	0	0	0	0	1090.37
YOR307C	SLY41	Protein involved in ER-to-Golgi transport	4	5	2	7.57281	8.21001	8.71382	8.59147	8.54237	10.6864	8.71029	9.63107	9.10102	11.1863	3155.33	6.7201	8.531	8.67669	7.49169	8.86237	10.4008	9.67061	9.06371	8.64619	12.8709	2905.39	8.08785	8.36542	7.81634	7.82365	9.21113	10.8655	8.86796	9.29077	9.7036	10.8953	2104.13
YBR273C	UBX7	UBX (ubiquitin regulatory X) domain-containing protein that interacts with Cdc48p	8	14	12	8.69871	9.51945	8.97933	11.1621	9.03062	9.54485	8.7019	8.3147	8.34144	8.60238	15906.8	9.06235	9.74497	7.94049	9.68212	9.94252	8.80274	9.98063	8.85339	8.53493	8.35903	36694.6	9.2016	9.24222	9.09677	9.878	9.95745	8.39674	9.8989	8.62745	8.39264	8.20964	23359.2
YFR002W	NIC96	Component of the nuclear pore complex, required for nuclear pore formation; forms a subcomplex with Nsp1p, Nup57p, and Nup49p	28	34	36	8.66171	9.6892	7.88789	9.05176	8.7753	9.51399	9.63181	9.00758	9.30457	9.39179	62358.4	8.61813	9.74915	7.86457	8.92811	8.87589	9.54651	9.75321	8.93576	9.31695	9.32203	70930.4	8.61183	9.48345	7.84497	9.05465	8.84249	9.51898	9.52747	9.13881	9.326	9.55857	88387.4
YPL019C	VTC3	Subunit of the vacuolar transporter chaperone (VTC) complex involved in membrane trafficking, vacuolar polyphosphate accumulation, microautophagy and non-autophagic vacuolar fusion	43	45	45	8.10887	1.92629	10.6138	8.45999	12.2968	2.20562	7.91127	18.3223	16.6038	4.4515	123482	8.07702	2.94546	10.9938	8.6079	11.996	2.63561	7.67373	16.8707	16.1879	4.9417	110893	7.95709	2.55139	10.6822	8.60823	12.1567	2.74714	7.60026	17.3467	16.3479	4.93651	139374
YFL004W	VTC2	Subunit of the vacuolar transporter chaperone (VTC) complex involved in membrane trafficking, vacuolar polyphosphate accumulation, microautophagy and non-autophagic vacuolar fusion	31	42	46	8.59653	3.31837	9.80262	9.24515	10.2233	6.63789	10.0174	12.8746	12.1315	8.06983	63762.1	8.30586	3.30473	9.84325	9.47344	10.3916	6.71158	10.1395	13.1023	11.7499	7.89733	110387	8.29351	3.42775	10.0196	9.40715	10.4775	6.52514	10.1642	13.3287	11.544	7.73079	140709
YHL023C	NPR3	Subunit of the conserved Npr2/3 complex that mediates downregulation of TORC1 activity upon amino acid limitation; subunit of SEA (Seh1-associated) complex; null mutant displays delayed meiotic DNA replication and double-strand break repair	3	2	3	7.27283	9.59432	7.83165	9.40681	9.47985	12.3668	8.15721	8.65628	8.15642	10.0167	1864.97	6.81559	7.15	8.24049	9.70139	8.96856	8.34335	10.3454	10.0634	10.696	10.5885	1796.64	8.55448	6.97381	9.05494	8.0009	9.83922	9.56541	9.96576	8.81121	9.49492	10.6631	2294.58
YFL049W	SWP82	Member of the SWI/SNF chromatin remodeling complex in which it plays an as yet unidentified role; has identifiable counterparts in closely related yeast species; abundantly expressed in many growth conditions; paralog of Npl6p	8	4	10	7.85552	7.77863	7.41396	8.45481	9.78331	10.3985	10.1015	9.21612	10.2777	9.6581	20174.6	8.80148	8.29675	7.69848	8.70755	9.35837	10.2315	9.21943	9.0551	9.44269	10.099	18204.8	7.59411	8.06253	6.94869	8.05615	10.8117	9.73834	11.0459	9.34522	10.2871	9.04019	17057.3
YER005W	YND1	Apyrase with wide substrate specificity, helps prevent inhibition of glycosylation by hydrolyzing nucleoside tri- and diphosphates that inhibit glycotransferases; partially redundant with Gda1p; mediates adenovirus E4orf4-induced toxicity	4	5	4	7.97989	6.4771	8.51652	8.70206	8.39303	11.5578	9.83615	8.85452	10.4028	10.2346	3192.7	7.32231	5.89441	7.56212	8.94651	8.20198	12.3847	9.71606	9.0924	10.0869	11.6859	7239.08	7.73741	6.79716	8.10118	9.15076	8.10182	11.4598	9.51389	9.47313	9.72605	10.8511	5005.78
YCR017C	CWH43	Putative sensor/transporter protein involved in cell wall biogenesis; contains 14-16 transmembrane segments and several putative glycosylation and phosphorylation sites; null mutation is synthetically lethal with pkc1 deletion	8	6	14	6.80202	8.873	9.60255	8.81986	7.75678	9.47844	10.0045	9.26287	9.33652	10.9926	11595.7	6.78485	9.40249	9.65426	9.10763	7.57253	9.20627	10.2823	9.09016	8.87935	10.9353	12345.7	6.87649	9.4311	9.99244	9.20474	7.584	9.14066	10.0368	8.66466	9.16697	10.8037	33021.1
YNL250W	RAD50	Subunit of MRX complex, with Mre11p and Xrs2p, involved in processing double-strand DNA breaks in vegetative cells, initiation of meiotic DSBs, telomere maintenance, and nonhomologous end joining	23	20	22	7.68355	10.6666	7.76838	9.46311	10.2166	8.53682	9.71307	8.01595	8.95583	9.88293	35789.5	8.01126	10.2345	7.83604	9.62498	10.6083	8.32039	9.43762	8.16514	9.13737	9.52803	38954.3	8.05618	10.4095	7.99001	9.43537	10.4911	8.21695	9.50949	8.01594	9.30409	9.47254	34847.7
YER014W	HEM14	Protoporphyrinogen oxidase, a mitochondrial enzyme that catalyzes the seventh step in the heme biosynthetic pathway, converting protoporphyrinogen IX to protoporphyrin IX; inhibited by diphenyl ether-type herbicides	14	15	13	9.31607	9.07229	8.56221	8.85516	10.9357	9.42806	8.67888	9.07955	8.88571	8.09101	17221.3	9.47113	8.80514	8.21482	8.64642	11.5442	9.38939	8.53395	9.15758	8.73912	8.4006	26531.7	9.04469	9.09144	8.18011	8.75111	11.4779	9.71647	8.25597	9.43009	8.53477	8.44447	28218
YNR033W	ABZ1	Para-aminobenzoate (PABA) synthase, has similarity to Escherichia coli PABA synthase components PabA and PabB; required for the synthesis of para-aminobenzoic acid, an important intermediate for folate and ubiquinone Q biosynthesis	8	17	13	8.60422	7.16348	9.27934	9.29996	9.07446	9.44162	9.29968	9.69735	8.88269	10.1804	13693.1	7.84928	6.49798	9.59404	9.46043	9.54802	8.57812	10.857	8.61479	9.36092	10.557	27487.3	7.9066	6.14959	10.0726	10.0453	8.7987	8.71175	9.51453	8.71581	10.004	10.9742	30946
YDR081C	PDC2	Transcription factor required for the synthesis of the glycolytic enzyme pyruvate decarboxylase, required for high level expression of both the THI and the PDC genes	3	7	12	6.56333	9.62966	7.25401	9.75865	7.25395	10.458	8.70052	8.44105	9.68767	13.2089	5618.18	6.44406	9.1622	7.53042	9.30382	7.28528	10.6768	8.72235	8.26124	10.0641	13.4582	17243.6	8.21355	7.54974	6.7055	9.14672	9.70527	8.38222	9.19678	9.39208	10.617	11.9874	17001.8
YDR205W	MSC2	Member of the cation diffusion facilitator family, localizes to the endoplasmic reticulum and nucleus; mutations affect the cellular distribution of zinc and also confer defects in meiotic recombination between homologous chromatids	2	5	5	6.67091	9.92235	8.75258	9.313	8.36959	9.88019	9.47433	8.88336	9.16774	10.4906	5044.34	6.76437	9.92236	9.14565	9.0467	8.0472	10.0043	9.97873	8.84423	9.5176	9.62308	6198.11	7.52232	10.1097	8.3509	8.52239	8.80391	9.73542	9.71399	8.93097	9.40597	9.8202	7629.19
YLR167W	RPS31	Fusion protein that is cleaved to yield a ribosomal protein of the small (40S) subunit and ubiquitin; ubiquitin may facilitate assembly of the ribosomal protein into ribosomes; interacts genetically with translation factor eIF2B	12	14	8	10.8842	9.89756	9.97629	9.05915	8.56168	7.7223	7.53197	10.1752	8.90809	8.17474	30075.3	10.4276	9.7043	10.588	8.76466	9.00175	7.64196	8.20727	9.00824	9.10933	8.47168	51545.8	11.4585	9.70157	9.66543	8.13329	8.98659	7.35871	8.90802	9.37219	9.32302	8.00518	38363.5
YPL093W	NOG1	Putative GTPase that associates with free 60S ribosomal subunits in the nucleolus and is required for 60S ribosomal subunit biogenesis; constituent of 66S pre-ribosomal particles; member of the ODN family of nucleolar G-proteins	35	42	42	7.28192	8.73863	7.28709	8.21022	7.17738	11.766	7.93436	8.89949	10.4362	13.2509	76615.1	7.05118	8.71985	7.25186	8.01455	7.64775	11.2767	8.7446	8.74487	10.5022	12.9657	96567.9	7.21741	8.43973	7.16336	8.09302	7.33572	11.8261	8.41273	8.8091	10.4246	13.1912	110904
YPL067C	YPL067C	Putative protein of unknown function; green fluorescent protein (GFP)-fusion protein localizes to the cytoplasm; YPL067C is not an essential gene	5	6	6	9.02203	9.02876	9.74174	9.02362	8.9591	6.71194	9.66362	9.18882	9.67711	9.88046	8669.06	9.45144	8.74144	9.93152	9.35419	9.09063	6.56123	8.89206	9.73091	9.5035	9.67928	5836.17	8.90523	8.88461	10.3398	9.25886	8.96739	6.99826	8.64384	9.48324	9.96557	9.4524	7530.57
YAR028W	YAR028W	Putative integral membrane protein, member of DUP240 gene family; GFP-fusion protein is induced in response to the DNA-damaging agent MMS	1	0	1	5.57137	10.2526	21.9748	10.1177	8.8377	8.07735	7.85663	5.70953	6.91324	5.52429	841.799	6.19025	9.47152	14.3414	12.2878	8.26075	10.17	9.44834	5.80554	7.90882	6.92569	0	0	0	0	0	0	0	0	0	0	0	547.864
YGR049W	SCM4	Potential regulatory effector of CDC4 function, suppresses a temperature-sensitive allele of CDC4, tripartite protein structure in which a charged region separates two uncharged domains, not essential for mitosis or meiosis	2	4	6	6.39377	17.2003	9.52213	8.36508	8.03228	9.13915	10.4828	7.84257	8.12523	5.75435	2647.45	6.17059	14.2835	9.06846	8.35314	8.07104	11.7077	8.52051	7.76943	9.15005	7.76363	13448.4	5.94459	16.5911	9.21436	8.0273	8.72014	8.74099	10.2552	8.27813	8.60874	6.54584	18451
YOR076C	SKI7	Coupling protein that mediates interactions between the Ski complex and the cytoplasmic exosome during 3'-5' RNA degradation; eRF3-like domain targets nonstop mRNA for degradation; null mutants have superkiller phenotype	8	9	7	8.78243	9.37258	8.42201	9.3386	9.40231	9.34463	9.23094	8.42388	9.36743	9.22707	9352.48	8.21983	10.0824	7.87643	9.38453	9.12067	10.1952	8.39091	9.33859	8.79526	9.48767	21530.3	7.78581	10.2861	8.19689	8.24859	9.25963	10.4159	9.26375	9.39591	8.50759	9.56585	9521.38
YNL113W	RPC19	RNA polymerase subunit AC19, common to RNA polymerases I and III	6	9	2	11.26	13.1829	8.29153	7.72117	8.0644	10.1613	8.34825	8.27753	7.38694	8.20233	8151.38	11.5359	13.2504	8.50385	7.80189	8.69685	10.1521	8.44209	8.17284	7.20418	7.15582	7869.01	10.0239	13.6112	8.50008	8.04675	8.51217	10.3572	7.97015	8.59897	7.49716	7.80634	4116.03
YEL063C	CAN1	Plasma membrane arginine permease, requires phosphatidyl ethanolamine (PE) for localization, exclusively associated with lipid rafts; mutation confers canavanine resistance	6	3	2	7.20322	11.5971	17.3481	7.41664	7.46203	11.0182	8.63432	5.27033	7.18221	7.75674	8682.04	7.4612	10.4929	17.932	7.79249	6.69895	12.2796	7.81054	5.29165	6.83567	8.25945	7765.94	7.141	10.6604	18.6956	8.07679	6.53752	10.9909	7.54874	4.94026	7.88391	8.45848	5565.59
YGL226C-A	OST5	Zeta subunit of the oligosaccharyltransferase complex of the ER lumen, which catalyzes asparagine-linked glycosylation of newly synthesized proteins	2	1	1	7.80406	11.3913	10.4961	8.51184	7.76882	9.35479	10.683	8.11785	8.62459	8.1398	4343.14	7.36802	11.6153	10.6203	8.6721	8.19574	9.21672	10.6593	8.40824	9.10842	7.02621	4519.96	7.30631	10.8979	10.5736	8.41488	8.35093	8.95788	11.0667	8.58002	9.69563	7.07883	4315.41
YNL072W	RNH201	Ribonuclease H2 catalytic subunit, removes RNA primers during Okazaki fragment synthesis and errant ribonucleotides misincorporated during DNA replication; homolog of RNAse HI; related to human AGS4 which causes Aicardi-Goutieres syndrome	3	2	2	8.74499	9.93088	7.54706	9.39082	9.24087	10.1845	8.21511	9.44045	8.56919	9.65679	5058.6	9.00206	9.04303	8.83165	8.75945	10.1164	9.09439	8.47784	8.61062	8.67393	10.3071	5896.62	9.14372	9.87154	8.46594	8.44919	9.58311	10.0454	9.1805	8.51891	8.1037	9.55747	9872.06
YCL035C	GRX1	Hydroperoxide and superoxide-radical responsive heat-stable glutathione-dependent disulfide oxidoreductase with active site cysteine pair; protects cells from oxidative damage	12	15	18	9.69492	14.937	9.91516	8.9363	8.59824	7.42448	7.72211	9.03228	8.05714	6.5399	17589.3	8.93331	15.7099	9.8396	9.16052	9.15561	6.82424	8.26332	8.80078	8.04044	6.17387	26883.1	9.88563	13.9754	9.40219	9.01701	8.9004	7.18718	8.53758	8.81745	8.65349	6.52788	39945.7
YPR062W	FCY1	Cytosine deaminase, zinc metalloenzyme that catalyzes the hydrolytic deamination of cytosine to uracil; of biomedical interest because it also catalyzes the deamination of 5-fluorocytosine (5FC) to form anticancer drug 5-fluorouracil (5FU)	14	11	10	9.95198	14.1123	8.55362	8.17833	7.89839	8.89774	9.08877	8.10139	8.77526	7.325	36663.5	10.0876	13.6691	7.95585	8.52511	7.67647	10.0492	8.92171	8.68441	8.32254	7.01005	29345.2	9.56847	13.6049	8.22067	8.74371	7.85882	9.8087	8.8136	8.78086	8.26553	7.24677	28492.6
YLR043C	TRX1	Cytoplasmic thioredoxin isoenzyme of the thioredoxin system which protects cells against oxidative and reductive stress, forms LMA1 complex with Pbi2p, acts as a cofactor for Tsa1p, required for ER-Golgi transport and vacuole inheritance	12	13	18	10.6188	11.5927	9.47989	7.22359	9.55825	7.68685	8.78905	9.46501	8.88666	7.5847	38627.1	9.95536	11.2564	9.32482	7.8812	9.65623	8.23401	7.94754	9.82723	8.90046	7.94086	41497.3	11.1281	11.1817	9.43561	7.31206	9.64607	7.69956	8.81971	9.36517	8.8761	7.46385	49482.5
YGR209C	TRX2	Cytoplasmic thioredoxin isoenzyme of the thioredoxin system which protects cells against oxidative and reductive stress, forms LMA1 complex with Pbi2p, acts as a cofactor for Tsa1p, required for ER-Golgi transport and vacuole inheritance	22	20	24	10.6612	8.61632	11.0179	8.96808	9.93979	8.38188	8.72638	8.75201	8.51172	7.30894	46386.6	10.3466	8.63912	10.7678	8.61475	10.2609	8.73007	8.67943	8.62999	8.43521	7.80535	49134	10.8407	8.44106	10.6965	8.82563	9.68324	8.47486	8.74005	8.88701	8.52708	7.79966	78834.8
YLR055C	SPT8	Subunit of the SAGA transcriptional regulatory complex but not present in SAGA-like complex SLIK/SALSA, required for SAGA-mediated inhibition at some promoters	9	11	11	10.0789	5.79267	10.1276	9.07114	10.3864	7.03707	9.04577	10.0663	9.03718	10.2644	9739.9	10.0658	5.51896	10.2465	8.95856	9.77779	6.95928	9.47433	9.46718	9.76518	10.7157	24965.1	9.67188	6.08737	9.89703	8.72859	10.2701	7.24484	9.03066	9.10107	9.85278	11.0213	30904.1
YJL026W	RNR2	Ribonucleotide-diphosphate reductase (RNR), small subunit; the RNR complex catalyzes the rate-limiting step in dNTP synthesis and is regulated by DNA replication and DNA damage checkpoint pathways via localization of the small subunits	27	32	36	8.89759	15.7166	8.3589	6.84074	10.5231	8.36995	9.32159	8.26112	8.03536	6.54315	91395.2	8.6514	15.1303	8.29795	7.07173	10.5279	8.59686	9.66459	8.12781	8.14228	6.70589	134711	8.83413	14.9427	8.26781	7.01849	10.5903	8.42841	9.50677	8.3032	8.30321	6.74309	130255
YGL228W	SHE10	Putative glycosylphosphatidylinositol (GPI)-anchored protein of unknown function; overexpression causes growth arrest	16	15	18	6.76594	9.05192	9.40578	9.17299	7.80496	9.94627	9.90598	8.49	9.39003	10.997	34823.5	7.25923	9.20159	9.44634	9.10689	7.96225	9.57048	10.3359	8.18968	9.36063	10.4749	39194.8	6.82353	9.27111	9.7877	9.08776	7.81032	9.52244	10.1341	8.83582	8.95383	10.6798	48378.4
YJL052W	TDH1	Glyceraldehyde-3-phosphate dehydrogenase, isozyme 1, involved in glycolysis and gluconeogenesis; tetramer that catalyzes the reaction of glyceraldehyde-3-phosphate to 1,3 bis-phosphoglycerate; detected in the cytoplasm and cell wall	18	17	20	4.39198	3.44645	10.5144	9.38117	17.3942	2.01915	7.68158	13.8682	15.1277	7.06911	27083.6	4.58703	3.55599	11.1721	8.74955	17.6181	1.93476	7.84098	14.3155	14.4032	6.73042	37814	4.67289	3.54066	11.3978	8.68855	17.8973	1.72603	7.76835	13.8572	15.0219	6.37492	41644.7
YGR192C	TDH3	Glyceraldehyde-3-phosphate dehydrogenase, isozyme 3, involved in glycolysis and gluconeogenesis; tetramer that catalyzes the reaction of glyceraldehyde-3-phosphate to 1,3 bis-phosphoglycerate; detected in the cytoplasm and cell wall	23	37	32	10.6189	9.50729	7.62714	8.19206	10.9253	11.026	6.15257	9.25557	8.48225	9.14424	81212	10.5799	8.78788	8.1794	10.0267	10.2474	10.7245	6.18806	9.33166	7.9711	8.84018	117110	11.7451	9.08193	9.20004	7.61027	11.2759	9.98505	6.29571	9.21283	8.59172	7.94064	150658
YJR009C	TDH2	Glyceraldehyde-3-phosphate dehydrogenase, isozyme 2, involved in glycolysis and gluconeogenesis; tetramer that catalyzes the reaction of glyceraldehyde-3-phosphate to 1,3 bis-phosphoglycerate; detected in the cytoplasm and cell wall	16	18	20	10.7601	6.35608	9.59436	8.81436	11.1136	6.0596	8.6117	11.257	10.6586	7.66763	38141.8	11.27	6.24774	9.91317	8.56179	11.0674	5.9165	8.44962	11.0174	10.864	7.63548	55992.1	11.6414	6.20012	10.1006	8.50082	11.5594	5.58776	8.44382	10.6464	10.7289	7.50689	57372
YDR037W	KRS1	Lysyl-tRNA synthetase	73	86	89	10.5501	6.56025	9.37132	8.99154	8.71541	10.1262	9.13305	8.97002	9.19354	9.31403	174332	10.7093	6.61744	9.66667	9.08785	8.63989	9.66048	8.98218	8.98525	9.30161	9.26455	184560	10.6459	6.65733	9.43842	9.30814	8.61868	9.97916	9.23868	8.91632	9.09595	9.00893	215804
YOR116C	RPO31	RNA polymerase III largest subunit C160, part of core enzyme; similar to bacterial beta-prime subunit and to RPA190 and RPO21	33	35	32	6.9959	6.21808	7.29315	8.6631	7.66878	11.0686	9.49938	8.89134	11.3374	13.3479	62191.1	7.06622	6.24021	7.55816	8.48343	7.41215	11.0101	9.1318	8.55277	11.6986	13.7687	70470.9	7.38094	6.48737	7.04265	8.09388	8.00972	10.9804	9.64927	8.60708	11.4414	13.2178	64956.7
YOL062C	APM4	Mu2-like subunit of the clathrin associated protein complex (AP-2); involved in vesicle transport	7	6	8	8.29592	8.47139	10.7509	8.89676	8.04146	9.21375	9.43373	8.78135	9.10647	9.92441	12144.9	8.31003	8.56771	10.6633	8.83001	8.13652	9.17229	9.08059	8.37249	9.17678	10.6059	17254.4	7.92859	8.80614	10.4957	8.84493	7.98903	9.10879	9.15111	8.70226	9.33477	10.5462	20262.9
YGR013W	SNU71	Component of U1 snRNP required for mRNA splicing via spliceosome; yeast specific, no metazoan counterpart	5	4	5	8.15415	8.88359	8.88773	9.17078	9.24899	9.8836	9.01739	8.58657	9.2855	9.80426	10773	8.27931	9.06528	8.90647	8.86259	8.87297	10.0872	9.15109	8.82228	9.4231	9.42888	5676.95	7.88334	8.68915	9.23994	9.08254	9.63123	9.84689	8.83824	9.14994	9.23762	9.31796	8603.19
YKR066C	CCP1	Mitochondrial cytochrome-c peroxidase; degrades reactive oxygen species in mitochondria, involved in the response to oxidative stress	23	29	34	8.957	11.9947	8.20277	8.26626	8.58724	8.65641	11.4799	8.62051	8.4695	7.6477	65261.1	8.7278	11.8192	8.0924	8.27896	8.55179	8.76727	11.395	8.58515	8.91614	7.78913	98825.7	8.92598	11.6706	8.33514	8.57881	8.58752	8.71908	10.8419	8.62512	8.73843	7.88898	112244
YLR386W	VAC14	Protein involved in regulated synthesis of PtdIns(3,5)P(2), in control of trafficking of some proteins to the vacuole lumen via the MVB, and in maintenance of vacuole size and acidity; interacts with Fig4p; activator of Fab1p	14	14	10	7.78404	7.97457	8.40644	8.25339	10.7478	8.45983	10.3822	10.047	10.1446	8.71326	21683.7	6.36639	6.80204	6.92064	7.88412	12.3886	7.31689	13.1306	12.5329	10.3957	7.19159	28051	7.86987	8.31694	8.70531	8.30202	10.2567	8.23739	9.71209	10.6056	9.82543	9.09323	16474.7
YBR080C	SEC18	ATPase required for vesicular transport between ER and Golgi, the 'priming' step in homotypic vacuole fusion, autophagy, and protein secretion; releases Sec17p from SNAP complexes; has similarity to mammalian NSF	41	47	46	8.94577	5.54437	10.4626	10.6551	9.16132	8.01696	9.8157	9.17331	9.38603	9.74506	92568	8.817	5.79466	10.5867	10.8456	9.03227	7.91633	9.82206	9.45618	9.19654	9.43429	93712.5	8.59844	5.51593	10.2103	10.5123	9.12995	7.65755	9.76392	9.20482	10.9572	9.33787	108995
YML048W	GSF2	ER localized integral membrane protein that may promote secretion of certain hexose transporters, including Gal2p; involved in glucose-dependent repression	27	28	32	7.20975	8.67178	9.42936	9.23527	7.80762	10.1704	10.0364	8.91997	8.94069	10.5057	72233.8	7.197	8.32784	9.28473	8.88102	8.13462	10.4104	10.0945	8.72902	9.27178	10.5722	74965.4	7.22621	8.51983	9.31311	9.08816	8.01506	10.3618	9.83525	8.80873	9.05838	10.683	98096.5
YDR298C	ATP5	Subunit 5 of the stator stalk of mitochondrial F1F0 ATP synthase, which is an evolutionarily conserved enzyme complex required for ATP synthesis; homologous to bovine subunit OSCP (oligomycin sensitivity-conferring protein); phosphorylated	15	18	19	9.58292	13.6857	8.89795	8.18387	9.19286	7.12915	9.63839	9.34983	8.49782	6.70389	47745.7	9.20588	13.9607	8.72847	8.46498	9.16045	7.48637	9.10411	9.22014	8.48965	7.09855	48282.8	9.02228	13.9213	8.63061	8.74888	8.95489	7.7665	8.81959	9.37845	8.47747	7.1902	58590.2
YAL031C	GIP4	Cytoplasmic Glc7-interacting protein whose overexpression relocalizes Glc7p from the nucleus and prevents chromosome segregation; potential Cdc28p substrate	5	9	8	8.27557	8.2973	8.11096	9.91155	9.30486	9.93066	9.12326	9.40034	9.38245	9.1827	5072.15	7.94051	8.45432	8.17556	9.35969	9.30037	10.0618	8.59013	9.55782	9.68021	9.77214	17862.3	8.25092	9.99845	8.41219	9.81793	8.77285	9.56684	9.015	9.41403	8.93023	8.72454	14479.4
YPR041W	TIF5	Translation initiation factor eIF5; functions both as a GTPase-activating protein to mediate hydrolysis of ribosome-bound GTP and as a GDP dissociation inhibitor to prevent recycling of eIF2	43	40	43	10.4748	10.9797	8.92501	9.11166	7.84877	10.0609	8.38677	8.42284	8.44547	8.24674	105249	10.3822	10.882	8.94419	9.20022	8.05876	10.1388	8.2947	8.25083	8.4607	8.28546	124161	10.7679	10.8208	9.33265	9.31666	7.89776	9.3846	8.37336	8.34956	8.57588	8.0817	118546
YBL007C	SLA1	Cytoskeletal protein binding protein required for assembly of the cortical actin cytoskeleton; interacts with proteins regulating actin dynamics and proteins required for endocytosis; found in the nucleus and cell cortex; has 3 SH3 domains	41	43	30	10.0672	5.47234	11.0934	9.09953	9.51707	8.09666	9.27988	9.10917	9.96797	9.20901	90413.8	10.6152	5.07281	11.4389	9.52793	9.88256	8.06532	9.07694	8.93925	8.98574	9.3153	94751.5	10.4317	5.51514	11.1107	9.64833	9.48847	8.55821	8.84607	9.10505	8.68377	9.51677	72459.9
YLR249W	YEF3	Gamma subunit of translational elongation factor eEF1B, stimulates the binding of aminoacyl-tRNA (AA-tRNA) to ribosomes by releasing eEF1A (Tef1p/Tef2p) from the ribosomal complex; contains two ABC cassettes; binds and hydrolyzes ATP	162	184	157	9.38395	6.20896	9.01743	9.29113	9.93646	9.97073	8.65201	8.70398	9.60969	10.1596	330427	9.45622	6.24793	8.91701	9.63739	9.44248	10.4013	8.22639	8.61587	9.40176	10.5508	362722	9.22869	6.55588	8.92432	9.60497	9.59187	10.4407	8.27242	8.86361	9.06272	10.3624	311026
YNL014W	HEF3	Translational elongation factor EF-3; paralog of YEF3 and member of the ABC superfamily; stimulates EF-1 alpha-dependent binding of aminoacyl-tRNA by the ribosome; normally expressed in zinc deficient cells	11	13	10	8.97636	6.48718	8.53417	9.66299	10.2275	10.1004	7.79649	9.23378	9.44238	10.4765	10361	9.42999	6.35608	8.6825	9.19197	9.93972	9.82648	8.55262	8.95372	9.7819	10.1913	14830	8.73261	6.69745	8.67663	9.35021	9.88596	10.0332	8.94186	9.12178	8.92013	10.5507	9905.95
YLR209C	PNP1	Purine nucleoside phosphorylase, specifically metabolizes inosine and guanosine nucleosides; involved in the nicotinamide riboside salvage pathway	8	11	13	9.23481	13.0046	7.33236	8.30132	10.3127	10.1843	8.28585	8.43394	8.05651	7.75103	14118.7	9.5148	12.9022	7.69956	8.14732	10.1431	9.92808	8.90266	8.69932	7.9772	6.98434	15319.7	9.43746	12.6351	7.58442	8.54256	9.9165	9.83575	8.48668	8.61895	8.28705	7.57619	34679.4
YDR163W	CWC15	Non-essential protein involved in pre-mRNA splicing, component of a complex containing Cef1p; has similarity to S. pombe Cwf15p	3	2	2	10.1616	14.8417	8.19748	7.47245	9.73974	8.95151	8.71371	8.11456	8.23823	6.44337	5374.55	9.31064	14.412	7.36602	8.53046	9.48936	9.69918	7.88781	9.0231	8.45569	6.71552	1957.11	8.87328	16.6027	8.15459	8.39357	9.90144	8.47129	7.18906	7.5286	7.57307	8.22459	2082.53
YGL014W	PUF4	Member of the PUF protein family, which is defined by the presence of Pumilio homology domains that confer RNA binding activity; preferentially binds mRNAs encoding nucleolar ribosomal RNA-processing factors	12	10	13	9.83268	11.0133	8.64619	7.75835	8.95202	8.76646	8.85947	9.39538	8.84723	8.83343	29777.8	9.05436	10.4512	8.63781	9.00199	8.17416	9.53956	7.73661	8.90428	9.3411	10.0677	28181.8	9.4856	10.1191	8.86422	8.21032	9.28932	8.7685	8.54923	8.70826	9.59639	9.32419	26337.5
YGR254W	ENO1	Enolase I, a phosphopyruvate hydratase that catalyzes the conversion of 2-phosphoglycerate to phosphoenolpyruvate during glycolysis and the reverse reaction during gluconeogenesis; expression is repressed in response to glucose	28	25	26	8.69177	3.74698	11.9316	8.95858	12.5528	3.23519	9.27028	13.7913	11.482	7.21644	103930	8.35761	3.72861	11.2438	9.1026	13.0461	3.2053	9.09509	14.0248	12.0011	7.13553	91824.1	8.49942	3.6756	12.3389	9.02352	12.701	2.94954	9.03408	13.4255	11.9595	7.31362	81659.6
YHR174W	ENO2	Enolase II, a phosphopyruvate hydratase that catalyzes the conversion of 2-phosphoglycerate to phosphoenolpyruvate during glycolysis and the reverse reaction during gluconeogenesis; expression is induced in response to glucose	317	406	334	9.93301	7.61568	7.93021	9.04595	11.2436	8.8045	8.90495	10.0431	9.4621	7.92313	441499	9.91539	7.87012	7.48147	8.48446	11.5802	8.69524	9.41808	10.3741	9.68785	7.40673	506576	10.1889	7.90982	7.8966	8.21236	11.6984	8.451	9.31884	10.0776	9.69724	7.47914	455834
YDL229W	SSB1	Cytoplasmic ATPase that is a ribosome-associated molecular chaperone, functions with J-protein partner Zuo1p; may be involved in folding of newly-made polypeptide chains; member of the HSP70 family; interacts with phosphatase subunit Reg1p	15	32	20	10.1	9.65559	8.29287	9.26299	8.79203	8.90055	8.7385	8.77952	8.82444	9.56163	5653.92	9.96791	9.08027	9.06507	8.97524	9.17917	8.99748	8.17185	9.63104	9.17821	8.6645	14089.9	9.92387	9.95539	8.30426	9.15082	8.95534	9.45693	8.27427	8.94296	8.92603	9.01606	12962.6
YNL209W	SSB2	Cytoplasmic ATPase that is a ribosome-associated molecular chaperone, functions with J-protein partner Zuo1p; may be involved in the folding of newly-synthesized polypeptide chains; member of the HSP70 family; homolog of SSB1	20	13	10	9.71804	9.8955	7.96185	9.32844	8.41222	9.27239	8.59983	9.34358	9.1319	9.24851	7401.04	10.5727	9.96491	8.89283	9.12484	8.86985	7.98375	8.69412	8.92249	9.0702	8.83061	5377.82	10.1223	10.0217	8.46908	8.99399	9.02864	8.492	8.70358	9.22264	8.7292	9.12117	5293.66
YLL024C	SSA2	ATP binding protein involved in protein folding and vacuolar import of proteins; member of heat shock protein 70 (HSP70) family; associated with the chaperonin-containing T-complex; present in the cytoplasm, vacuolar membrane and cell wall; 98% identical with Ssa1p, but subtle differences between the two proteins provide functional specificity with respect to propagation of yeast [URE3] prions an…	70	56	61	10.8038	9.30481	8.98329	9.17046	9.67581	8.13538	9.41013	8.17865	8.30645	8.92174	102401	10.2049	8.4921	8.36805	10.0556	10.0455	8.65299	8.57814	8.60976	8.39765	9.50415	100689	10.1014	8.78968	8.85325	10.4925	9.44536	8.66062	8.20543	8.54158	8.3439	9.4539	123271
YAL005C	SSA1	ATPase involved in protein folding and nuclear localization signal (NLS)-directed nuclear transport; member of heat shock protein 70 (HSP70) family; forms a chaperone complex with Ydj1p; localized to the nucleus, cytoplasm, and cell wall; 98% identical with Ssa2p, but subtle differences between the two proteins provide functional specificity with respect to propagation of yeast [URE3] prions and …	36	36	29	8.81117	6.15534	11.3174	13.8459	10.7378	4.55962	8.59587	8.53193	10.2556	8.04572	59140.5	8.62649	6.41719	11.4667	13.4132	11.8481	4.38948	8.47768	8.79745	9.75873	7.67655	45681.9	8.52019	6.32782	11.4288	12.9377	11.5277	4.63028	8.71799	9.28819	10.0356	7.44896	77345.7
YBL075C	SSA3	ATPase involved in protein folding and the response to stress; plays a role in SRP-dependent cotranslational protein-membrane targeting and translocation; member of the heat shock protein 70 (HSP70) family; localized to the cytoplasm	3	2	2	13.1246	7.32953	3.34135	20.0621	3.81981	1.74801	17.6718	4.54243	7.4056	11.7546	1808.27	12.247	8.22623	3.38828	21.4247	3.68268	2.33696	13.8682	5.79259	7.55006	12.3942	5790.74	12.3052	7.61273	2.88921	23.4456	4.05272	0.951004	15.0403	4.83635	6.25875	13.2481	1448.26
YER103W	SSA4	Heat shock protein that is highly induced upon stress; plays a role in SRP-dependent cotranslational protein-membrane targeting and translocation; member of the HSP70 family; cytoplasmic protein that concentrates in nuclei upon starvation	9	11	13	12.2766	8.12895	6.86868	12.9574	7.33724	4.95996	10.7851	7.53575	8.47232	11.5498	10283.3	15.5075	6.12297	6.64129	14.2953	6.86915	2.24117	11.7857	6.7407	8.89516	11.8966	20703.2	15.3381	6.16092	6.18888	13.8447	6.722	2.30973	12.5417	6.73293	9.03413	11.908	28107.3
YJL034W	KAR2	ATPase involved in protein import into the ER, also acts as a chaperone to mediate protein folding in the ER and may play a role in ER export of soluble proteins; regulates the unfolded protein response via interaction with Ire1p	71	88	77	10.2981	14.5239	9.04094	8.8852	9.11337	7.85414	9.10696	6.92633	7.43587	7.67584	147872	10.721	14.5291	9.15612	8.63298	9.27336	7.56727	8.76169	7.02887	7.54246	7.71217	189459	10.381	14.3686	9.27692	8.69277	9.13906	7.81391	8.71192	7.06284	7.60526	7.85071	178796
YER023W	PRO3	Delta 1-pyrroline-5-carboxylate reductase, catalyzes the last step in proline biosynthesis	19	18	16	9.37178	9.92718	8.74295	10.3106	8.27	9.35017	7.97025	8.87693	9.12011	8.96683	61875.6	10.0349	10.3795	8.65768	10.0651	8.45403	8.61997	8.89702	9.1103	8.51808	8.16663	59281.1	9.53845	11.0394	8.69929	10.1117	7.93217	9.34801	7.80735	8.7449	8.53462	9.13428	38366
YLR059C	REX2	3'-5' RNA exonuclease; involved in 3'-end processing of U4 and U5 snRNAs, 5S and 5.8S rRNAs, and RNase P and RNase MRP RNA; localized to mitochondria and null suppresses escape of mtDNA to nucleus in yme1 yme2 mutants; RNase D exonuclease	2	5	10	8.93232	15.5466	8.66251	8.1726	6.34201	10.2649	8.50805	8.78158	7.79374	7.88788	4645.71	9.14285	14.5882	8.58261	8.69064	6.8211	9.65959	8.58144	8.43886	8.39411	8.00422	8178.26	9.40748	14.6564	8.65911	7.47535	6.98174	11.5101	9.05231	8.82024	7.6235	6.74823	17701.3
YFL041W	FET5	Multicopper oxidase, integral membrane protein with similarity to Fet3p; may have a role in iron transport	8	8	10	7.41873	8.85286	7.97905	9.07029	7.82952	10.4236	8.76095	8.9755	9.66915	11.9701	7953.5	7.61905	8.80322	8.24206	8.0785	6.90514	10.4377	9.20929	8.1413	9.85453	13.6471	13266.9	7.68794	9.21673	8.14291	8.66941	7.86902	9.37853	9.81903	8.84645	9.28021	11.992	18021.5
YOR360C	PDE2	High-affinity cyclic AMP phosphodiesterase, component of the cAMP-dependent protein kinase signaling system, protects the cell from extracellular cAMP, contains readthrough motif surrounding termination codon	7	9	8	9.22617	9.93322	7.8174	8.72653	7.88266	11.0509	8.8219	8.49486	8.36114	10.6186	13877.3	9.27769	9.03113	8.17081	8.38006	7.68225	10.8366	9.57072	8.58228	8.98337	10.4039	18547.9	9.44578	9.09675	8.05472	8.76061	7.74447	11.3014	8.31235	8.22109	9.15669	10.8139	24443.6
YMR108W	ILV2	Acetolactate synthase, catalyses the first common step in isoleucine and valine biosynthesis and is the target of several classes of inhibitors, localizes to the mitochondria; expression of the gene is under general amino acid control	48	61	57	11.1049	9.06683	7.97352	7.65899	10.403	10.2239	8.7467	9.81645	8.40881	7.50656	74394.6	11.1173	9.22295	7.73783	7.75152	10.5956	10.5807	8.79344	9.69293	8.06853	7.35106	130814	11.0995	9.43927	7.99461	8.05567	9.90194	10.834	8.29143	9.53608	7.91608	7.86408	146517
YHR037W	PUT2	Delta-1-pyrroline-5-carboxylate dehydrogenase, nuclear-encoded mitochondrial protein involved in utilization of proline as sole nitrogen source; deficiency of the human homolog causes HPII, an autosomal recessive inborn error of metabolism	25	21	22	8.58243	6.05948	10.5899	8.77003	11.697	7.74156	9.12591	11.9689	8.84129	7.51815	44350	8.81411	5.89195	10.1263	8.58179	11.6909	7.77012	9.12708	11.9321	9.34978	7.62967	43687	8.69558	6.1313	10.6239	8.49227	11.6941	7.79459	8.97338	11.4857	9.41398	7.63159	53309.1
YDR425W	SNX41	Sorting nexin, involved in the retrieval of late-Golgi SNAREs from the post-Golgi endosome to the trans-Golgi network; interacts with Snx4p	6	2	3	7.64398	10.0097	9.36503	9.75971	8.67656	8.37206	10.059	8.95624	9.1243	8.92893	11722.6	7.31167	10.1885	9.53623	9.50536	9.74742	7.78261	10.1017	8.50232	9.61566	8.60935	2404.76	7.56024	9.45116	8.81298	10.2992	9.89571	7.69352	10.1833	8.46206	9.1174	9.41504	7556.53
YIL112W	HOS4	Subunit of the Set3 complex, which is a meiotic-specific repressor of sporulation specific genes that contains deacetylase activity; potential Cdc28p substrate	6	7	6	8.36764	8.0879	9.04767	8.9902	9.12534	9.53725	9.0304	9.30621	9.48347	9.94943	8028.42	8.65924	8.09333	8.61567	9.40582	9.1638	10.0729	8.43144	9.04031	9.69654	9.71477	11774.4	8.2821	8.15212	8.92254	9.15731	9.27239	9.4025	8.22409	9.65743	9.76226	10.0774	9423.87
YGL171W	ROK1	ATP-dependent RNA helicase of the DEAD box family; required for 18S rRNA synthesis	14	20	25	8.68714	8.65631	7.07599	8.17993	8.78536	12.4989	8.42103	8.74263	9.52098	10.3906	49268.8	8.49373	8.51726	7.55798	8.4442	8.62158	12.3745	8.70037	8.43708	9.32121	10.4234	47614.5	8.67211	8.77716	7.36664	8.31815	8.63652	12.0866	9.09104	8.42175	9.30011	10.2524	71441.1
YDL084W	SUB2	Component of the TREX complex required for nuclear mRNA export; member of the DEAD-box RNA helicase superfamily and is involved in early and late steps of spliceosome assembly; homolog of the human splicing factor hUAP56	53	50	45	9.48622	7.84094	9.61931	9.14962	8.63444	9.50359	9.42162	9.50329	9.13492	8.61748	126005	9.55644	8.01916	10.0429	8.9641	8.47691	9.17104	9.88501	9.20378	9.09446	8.49876	134496	9.59406	7.80452	9.42956	9.03893	8.68195	9.50494	9.69738	9.27405	9.12614	8.76029	135996
YCR071C	IMG2	Mitochondrial ribosomal protein of the large subunit	9	9	8	9.53948	13.3753	8.55264	9.21485	8.2695	9.21458	8.49556	8.28772	7.86572	8.06918	20098.1	9.65237	13.7567	8.54106	9.61819	7.41003	10.0603	7.45802	8.28924	7.77106	8.33114	18875.2	10.0831	10.9903	9.94544	9.36173	8.71329	8.5236	9.01711	8.50293	7.7273	8.03869	16951.5
YMR212C	EFR3	Protein required for Stt4-containing phosphoinositide kinase patch assembly at the plasma membrane; exhibits synthetic lethal genetic interactions with PHO85; has sequence similarity to the Drosophila rolling blackout (RBO) gene	15	20	23	9.2849	7.03956	8.80731	8.3946	8.42256	11.2763	8.97401	9.31954	9.08172	10.3452	29509.8	9.53627	6.98942	8.78745	8.80408	8.32863	10.9702	8.93737	9.00123	9.05611	10.4992	51590.4	9.63794	7.04314	8.87685	8.02368	8.63916	11.0789	9.37822	8.94714	9.06365	10.2366	71163.6
YPL231W	FAS2	Alpha subunit of fatty acid synthetase, which catalyzes the synthesis of long-chain saturated fatty acids; contains the acyl-carrier protein domain and beta-ketoacyl reductase, beta-ketoacyl synthase and self-pantetheinylation activities	197	208	190	8.43428	7.3133	10.184	8.67585	9.05188	9.05597	9.36185	8.94342	9.87099	10.0333	469220	8.46579	7.14618	10.5434	8.70834	8.97611	8.85837	9.56018	8.90183	9.91077	9.8451	544900	8.54193	7.16171	10.4722	8.45715	9.1353	8.8402	9.53736	8.88241	9.9767	9.91183	522926
YGR246C	BRF1	TFIIIB B-related factor, one of three subunits of RNA polymerase III transcription initiation factor TFIIIB, binds TFIIIC and TBP and recruits RNA pol III to promoters, amino-terminal half is homologous to TFIIB	4	3	3	9.0216	7.58413	8.63443	9.28191	9.38794	10.5491	8.15769	8.93294	9.29901	10.0867	6310.97	7.41448	7.9337	8.7418	7.91721	9.43774	11.7067	8.4669	8.85196	8.96406	11.4668	2332.89	8.06434	7.18558	7.83444	9.19433	8.33113	11.6696	8.24887	8.64016	9.82759	11.9109	3814.41
YHL011C	PRS3	5-phospho-ribosyl-1(alpha)-pyrophosphate synthetase, synthesizes PRPP, which is required for nucleotide, histidine, and tryptophan biosynthesis; one of five related enzymes, which are active as heteromultimeric complexes	20	26	19	9.55617	9.37878	9.59858	9.2539	8.49689	10.2974	9.04706	7.77197	8.37246	9.13768	48270.5	9.74798	9.6532	9.78761	8.81457	8.4092	9.97436	9.30845	8.12675	8.37033	8.71325	60354.3	9.2445	9.26088	9.25641	9.18929	8.64449	10.4594	8.87905	7.91431	8.67488	9.38549	51413.4
YER099C	PRS2	5-phospho-ribosyl-1(alpha)-pyrophosphate synthetase, synthesizes PRPP, which is required for nucleotide, histidine, and tryptophan biosynthesis; one of five related enzymes, which are active as heteromultimeric complexes	6	10	11	8.80466	10.1923	8.15973	8.43092	8.62702	11.2019	9.12032	9.19767	8.72179	8.46515	20876.3	8.75949	10.175	8.07451	8.19605	8.88348	11.1518	9.17075	8.60585	9.03877	8.84157	21419.9	9.49721	10.0559	7.30187	8.30181	8.611	11.2865	9.86708	8.70869	9.10271	8.19065	43251.9
YBL068W	PRS4	5-phospho-ribosyl-1(alpha)-pyrophosphate synthetase, synthesizes PRPP, which is required for nucleotide, histidine, and tryptophan biosynthesis; one of five related enzymes, which are active as heteromultimeric complexes	9	7	9	9.51426	8.81775	9.04551	8.61288	9.34187	8.79746	8.99702	8.89124	9.42235	9.47333	26414.3	10.0305	8.82931	8.83591	8.88145	8.94934	9.05553	8.848	8.83172	9.23314	9.42501	23697.2	9.84161	8.80773	8.5747	9.2205	8.48373	9.5495	7.9863	8.85936	9.34146	10.236	23195.7
YMR229C	RRP5	RNA binding protein with preference for single stranded tracts of U's involved in synthesis of both 18S and 5.8S rRNAs; component of both the ribosomal small subunit (SSU) processosome and the 90S preribosome	86	109	92	7.66093	6.49466	7.42841	8.49718	7.75511	10.8338	9.52067	8.5917	10.6699	13.525	242495	7.58444	6.23138	7.54828	8.77545	7.51884	10.901	9.51146	8.44922	10.8135	13.591	290707	7.69447	6.31691	7.44162	8.69108	7.66528	10.8247	9.54011	8.50261	10.8004	13.4242	268471
YJL060W	BNA3	Kynurenine aminotransferase, catalyzes formation of kynurenic acid from kynurenine; potential Cdc28p substrate	14	20	17	7.83615	7.17621	9.76017	10.4406	9.75871	6.25191	9.23599	13.276	8.6993	8.44834	27609	8.01142	7.07008	10.1557	9.78411	9.97877	5.89883	9.15013	13.5492	9.05279	8.27436	41096.5	8.03993	7.05947	10.0357	10.0085	9.77208	5.97607	9.13401	13.3	9.08722	8.49167	50664.4
YMR116C	ASC1	G-protein beta subunit and guanine nucleotide dissociation inhibitor for Gpa2p; ortholog of RACK1 that inhibits translation; core component of the small (40S) ribosomal subunit; represses Gcn4p in the absence of amino acid starvation	93	109	103	11.2796	9.78663	9.29846	10.1508	8.81368	7.30112	8.30344	9.20179	8.87717	7.86578	143213	10.9063	9.35288	8.97208	11.3737	8.70649	7.34363	8.32709	8.8502	8.9311	8.1367	156034	10.8967	9.66527	8.96137	9.97163	8.77317	7.6645	8.54276	9.11328	9.00488	8.29569	175721
YDR295C	HDA2	Subunit of a possibly tetrameric trichostatin A-sensitive class II histone deacetylase complex containing an Hda1p homodimer and an Hda2p-Hda3p heterodimer; involved in telomere maintenance	11	16	12	8.65706	8.50351	8.87643	9.08994	10.2983	9.94995	8.74192	9.12742	8.88272	8.78766	10022.8	8.44648	8.84602	8.4725	8.7049	10.5215	10.1227	8.28997	9.49893	8.67006	9.32334	16171.5	9.13677	8.65057	8.4869	8.86216	10.2204	10.2557	8.82738	8.89188	8.95382	8.63586	18697.3
YBR208C	DUR1,2	Urea amidolyase, contains both urea carboxylase and allophanate hydrolase activities, degrades urea to CO2 and NH3; expression sensitive to nitrogen catabolite repression and induced by allophanate, an intermediate in allantoin degradation	58	57	61	9.01972	11.4517	10.6495	6.5553	8.29868	3.08712	9.88238	14.6944	10.3809	6.84036	126366	9.14692	11.6886	10.7654	6.4376	8.3438	2.62609	10.0138	15.17	10.3441	6.46521	127115	9.07724	11.6112	10.7378	6.491	8.37129	2.86649	9.95083	14.9545	10.4688	6.40476	143530
YCL043C	PDI1	Protein disulfide isomerase; multifunctional protein resident in the endoplasmic reticulum lumen, essential for the formation of disulfide bonds in secretory and cell-surface proteins, unscrambles non-native disulfide bonds; forms a complex with Mnl1p that has exomannosidase activity, processing unfolded protein-bound Man8GlcNAc2 oligosaccharides to Man7GlcNAc2 which promotes degradation in the u…	53	50	53	10.6877	12.2801	9.83228	8.88943	8.65173	8.21355	8.77934	7.38189	8.22237	7.9383	172372	10.4402	13.0462	9.3246	8.91989	8.67821	8.20784	8.64228	7.8727	7.9607	7.82364	177600	10.2053	12.8897	9.73692	9.19553	8.53185	8.05738	8.45315	8.13371	7.82297	7.87372	179396
YLL023C	POM33	Transmembrane nucleoporin involved in nuclear pore complex (NPC) distribution, assembly or stabilization; highly conserved across species, orthologous to human TMEM33 and paralogous to Per33p	8	6	9	6.83467	11.2751	11.2086	10.5144	7.94896	7.86199	10.3856	8.17131	8.07051	8.60102	20146.7	6.3304	12.0852	10.5734	11.0694	7.18379	8.35479	9.69485	7.80817	8.80567	8.96815	10369.4	6.25335	12.6984	10.5333	10.6122	7.07629	8.74211	9.66376	8.49595	7.88804	8.92396	25877.8
YHR005C	GPA1	GTP-binding alpha subunit of the heterotrimeric G protein that couples to pheromone receptors; negatively regulates the mating pathway by sequestering G(beta)gamma and by triggering an adaptive response; activates Vps34p at the endosome	16	17	16	8.48478	10.1434	9.12374	7.88635	8.8774	10.334	9.39958	8.53598	9.1696	8.96508	32884.2	8.29404	10.9378	9.09772	8.14532	8.51083	10.8371	8.63618	8.6059	8.87494	8.95555	33549.4	7.85152	11.1243	9.24769	8.07385	8.45205	10.739	8.64159	8.77264	8.63719	9.38687	36946.7
YKL182W	FAS1	Beta subunit of fatty acid synthetase, which catalyzes the synthesis of long-chain saturated fatty acids; contains acetyltransacylase, dehydratase, enoyl reductase, malonyl transacylase, and palmitoyl transacylase activities	148	180	173	7.87284	6.78704	10.5939	8.69763	8.94001	9.23475	9.39431	8.61971	10.2449	10.5479	397203	7.9983	6.91227	10.6383	8.75863	8.69626	9.34101	9.53045	8.67328	10.0207	10.3418	442660	8.02445	7.04454	10.731	8.53486	9.07346	8.92151	9.80128	8.82802	9.96654	9.99143	467407
YGR233C	PHO81	Cyclin-dependent kinase (CDK) inhibitor, regulates Pho80p-Pho85p and Pcl7p-Pho85p cyclin-CDK complexes in response to phosphate levels; inhibitory activity for Pho80p-Pho85p requires myo-D-inositol heptakisphosphate (IP7) generated by Vip1p	23	23	27	7.50998	4.79576	10.7439	8.19096	11.6675	4.60434	8.42886	13.2254	14.9869	6.75838	47443.4	7.32387	4.62151	10.2189	9.21467	10.9322	4.52453	7.8827	14.6163	14.5473	7.03489	52271.5	7.36918	4.86553	10.4937	8.69394	11.4044	4.53236	8.16744	14.2361	14.3379	6.82534	58059.7
YIL115C	NUP159	Nucleoporin, subunit of the Nup82 subcomplex of the nuclear pore; part of the nuclear pore that is found exclusively on the cytoplasmic side; required for mRNA export; regulates ADP release from the ATP-dependent RNA helicase Dbp5p	43	43	40	8.90737	9.27079	8.5274	9.07284	9.28027	9.81701	9.05191	8.95169	8.74025	9.29514	60812.5	9.29298	9.16807	8.69873	8.84458	9.44928	9.82073	8.63232	9.00427	8.90977	9.08325	83158.6	9.1142	9.30491	8.84985	8.92042	9.30975	9.81772	8.76215	8.88442	8.814	9.13685	81122.8
YGR180C	RNR4	Ribonucleotide-diphosphate reductase (RNR), small subunit; the RNR complex catalyzes the rate-limiting step in dNTP synthesis and is regulated by DNA replication and DNA damage checkpoint pathways via localization of the small subunits	46	50	45	8.89471	12.8412	8.39685	7.83685	10.0323	8.65212	8.66202	8.46994	9.00384	8.10381	106136	8.99923	13.1307	8.54081	7.74594	10.0652	7.95991	8.86629	8.38755	9.35661	7.86947	137567	9.27426	13.0093	8.50687	7.83774	9.92349	8.35041	8.83541	8.26153	8.82836	8.09405	125285
YGR019W	UGA1	Gamma-aminobutyrate (GABA) transaminase (4-aminobutyrate aminotransferase) involved in the 4-aminobutyrate and glutamate degradation pathways; required for normal oxidative stress tolerance and nitrogen utilization	20	24	18	7.20576	8.89722	11.6142	12.4777	7.99524	4.84062	11.0223	9.38159	9.9454	7.46859	31394.5	6.49621	8.99124	12.0312	13.5739	7.80258	3.66716	11.8776	9.39147	9.67521	7.38007	44493.7	6.85798	8.69193	11.8094	13.4181	7.83414	4.08444	11.6008	9.42371	9.96005	7.16355	37415
YBL045C	COR1	Core subunit of the ubiquinol-cytochrome c reductase complex (bc1 complex), which is a component of the mitochondrial inner membrane electron transport chain	20	20	21	8.71045	9.90501	10.0573	8.48903	10.3753	7.61813	9.93096	9.62551	8.86231	7.30548	72993.6	8.80951	9.73892	10.2475	8.66742	10.2426	7.40712	9.85004	9.84391	8.82926	7.27953	47520	9.2035	9.92242	10.3048	8.77251	9.794	7.51044	9.63139	10.0403	8.42646	7.31281	55047.3
YDL073W	YDL073W	Putative protein of unknown function; YDL073W is not an essential gene	2	12	4	6.74833	7.66294	8.54006	9.90199	9.89165	10.7815	9.52808	7.70419	9.45803	10.7198	711.627	7.94905	9.15044	8.82976	10.1799	8.4346	10.493	9.54792	8.70056	8.87659	8.7129	11187.7	7.79165	8.59637	8.62519	10.5265	8.30212	10.6253	8.78043	8.83912	9.0966	9.7116	3282.76
YOR271C	FSF1	Putative protein, predicted to be an alpha-isopropylmalate carrier; belongs to the sideroblastic-associated protein family; non-tagged protein is detected in purified mitochondria; likely to play a role in iron homeostasis	17	15	19	8.1691	13.5267	7.65771	7.41717	7.46242	11.861	7.55636	9.66707	8.59557	9.01884	54445.6	8.49411	13.3026	7.54254	6.89531	7.43574	13.0324	8.16996	9.42154	8.47432	8.12147	45747.2	8.08382	13.6122	7.24062	6.90884	7.42574	12.9237	8.15761	9.69961	8.71726	8.17746	61255.3
YHR119W	SET1	Histone methyltransferase, subunit of the COMPASS (Set1C) complex; COMPASS methylates histone H3K4; Set1p-dependent H3K4 trimethylation recruits Nrd1p, allowing efficient termination of snoRNAs and cryptic unstable transcripts (CUTs) by Nrd1p-Nab3p-Sen1p pathway; modulates histone acetylation levels in promoter proximal regions to ensure efficient Nrd1p-dependent termination; required in transcri…	5	3	9	7.55333	8.78399	8.06877	8.61986	8.32874	10.2651	8.24822	9.70547	9.96657	11.4099	5065.2	7.8697	8.52892	7.33662	8.49553	8.49751	9.87812	9.38364	9.47095	9.96341	11.5003	4925.43	8.54002	8.18756	6.67542	8.91594	8.16167	10.3326	9.79136	9.16049	10.3131	10.8257	16836.4
YLR144C	ACF2	Intracellular beta-1,3-endoglucanase, expression is induced during sporulation; may have a role in cortical actin cytoskeleton assembly	7	9	9	8.02489	8.57186	9.39857	10.5101	8.86307	8.89164	7.91865	8.6951	9.56329	10.4818	9319.41	9.40623	7.72507	8.71724	9.02859	9.31863	9.19169	9.62521	8.69753	9.15314	10.057	15343.6	9.40567	8.48478	8.66793	9.50853	8.66095	8.92285	9.08144	8.98685	8.63677	10.5407	14016
YGL123W	RPS2	Protein component of the small (40S) subunit, essential for control of translational accuracy; phosphorylation by C-terminal domain kinase I (CTDK-I) enhances translational accuracy; methylated on one or more arginine residues by Hmt1p	94	62	75	9.92515	9.86279	8.33428	8.93987	8.69177	7.42883	9.30177	10.2899	9.76835	8.35225	214273	10.1052	10.0566	8.9187	8.78051	8.37119	7.27701	9.55127	10.1388	9.66245	8.07394	174264	10.0204	9.89481	8.69728	8.85567	8.79871	7.25516	9.59268	10.1405	9.32271	8.32647	218777
YPR118W	MRI1	5'-methylthioribose-1-phosphate isomerase; catalyzes the isomerization of 5-methylthioribose-1-phosphate to 5-methylthioribulose-1-phosphate in the methionine salvage pathway	12	12	14	9.90637	6.83565	9.08256	8.38584	10.3918	9.97476	9.46779	8.76606	9.09623	9.01463	25649.5	10.0585	6.70443	8.8661	8.21059	10.4345	9.86673	9.57254	8.4103	9.26182	9.5346	31348.3	9.54545	6.57669	8.58065	8.26816	10.4455	10.0636	9.49025	8.74616	9.57729	9.63151	41776.2
YDL130W	RPP1B	Ribosomal protein P1 beta, component of the ribosomal stalk, which is involved in interaction of translational elongation factors with ribosome; accumulation is regulated by phosphorylation and interaction with the P2 stalk component	19	24	31	9.85681	9.59865	7.61408	9.60389	8.97966	7.87852	9.19922	10.2614	8.80504	9.09992	34009.6	9.7215	10.6061	7.81481	8.82715	8.72063	8.51628	8.43834	10.8487	8.26942	9.16562	25372.1	9.5768	10.6141	7.70815	9.10154	9.07965	8.5547	8.36752	10.9018	7.94167	9.06227	39056.4
YDR272W	GLO2	Cytoplasmic glyoxalase II, catalyzes the hydrolysis of S-D-lactoylglutathione into glutathione and D-lactate	8	11	10	8.76533	9.32202	9.92126	10.8426	9.47775	7.61888	9.48288	9.18912	8.39042	7.86366	10588.5	9.3096	10.4405	10.0095	11.2236	8.53883	7.34332	9.25109	9.02103	8.20468	7.54864	21113.1	9.53951	10.4152	10.4455	11.3922	8.21215	7.2573	9.15289	8.88644	8.11943	7.45502	31425.8
YCR004C	YCP4	Protein of unknown function, has sequence and structural similarity to flavodoxins; predicted to be palmitoylated; the authentic, non-tagged protein is detected in highly purified mitochondria in high-throughput studies	17	13	14	8.29873	11.4205	9.37453	9.31644	9.78929	8.42433	9.64249	8.21667	9.60057	6.79666	26883.9	7.6697	13.2904	9.13208	9.7004	9.70252	9.5878	9.00321	8.94807	7.03826	6.79714	28850.6	7.96116	13.0805	9.40827	9.91869	9.34883	9.47369	8.88563	8.75387	7.321	6.75828	36584
YDR032C	PST2	Protein with similarity to members of a family of flavodoxin-like proteins; induced by oxidative stress in a Yap1p dependent manner; the authentic, non-tagged protein is detected in highly purified mitochondria in high-throughput studies	14	13	10	8.08671	13.0721	10.3968	10.6464	9.19248	6.91876	9.94376	8.72052	8.25725	5.6053	17824	8.70811	12.5637	10.8524	10.2169	9.35327	6.63454	10.2062	8.27718	8.30793	5.77111	24608.4	8.38279	12.2329	10.7679	10.6025	9.4996	6.86687	9.94013	8.23832	8.40266	5.95889	24809.2
YKR027W	BCH2	Member of the ChAPs family of proteins (Chs5p-Arf1p-binding proteins: Bch1p, Bch2p, Bud7p, Chs6p), that forms the exomer complex with Chs5p to mediate export of specific cargo proteins, including Chs3p, from the Golgi to the plasma membrane	5	5	8	7.97802	7.38662	9.04937	9.14508	9.10528	10.1995	10.2394	10.0771	8.67964	9.05907	2976.47	7.51896	7.29534	9.32073	9.39669	9.37006	9.55181	9.84254	9.21744	9.92348	9.45736	9000.91	7.98252	7.40305	8.76776	9.29922	8.90657	10.325	9.55226	9.46951	9.66817	9.53881	15159.5
YGL076C	RPL7A	Protein component of the large (60S) ribosomal subunit, nearly identical to Rpl7Bp and has similarity to E. coli L30 and rat L7 ribosomal proteins; contains a conserved C-terminal Nucleic acid Binding Domain (NDB2)	4	3	3	9.6839	10.3344	8.7692	8.69779	8.36151	7.40293	9.0676	10.4346	9.46716	8.67636	5571.69	8.72398	9.36253	6.8373	9.43227	7.84683	11.1966	7.46237	9.52664	9.48119	11.0267	1435.14	9.41678	10.1152	8.62601	8.55282	7.8661	8.0175	9.00615	10.5392	9.19337	9.57325	1723.32
YPL198W	RPL7B	Protein component of the large (60S) ribosomal subunit, nearly identical to Rpl7Ap and has similarity to E. coli L30 and rat L7 ribosomal proteins; contains a conserved C-terminal Nucleic acid Binding Domain (NDB2)	2	1	2	10.5829	8.64498	10.1778	9.01117	8.27005	3.61237	9.57711	10.5713	10.7199	9.71138	4412.82	11.4761	8.52896	10.2624	10.0079	8.04178	3.98647	8.49569	10.3576	10.1767	9.63411	2721.29	10.7962	9.38107	10.2123	9.51083	8.20555	3.44387	8.86808	10.7794	10.2794	9.3997	3146.05
YDR239C	YDR239C	Protein of unknown function that may interact with ribosomes, based on co-purification experiments	8	10	7	9.84064	10.1857	8.00705	7.29134	10.808	9.06206	9.19279	8.57495	9.20807	8.73966	12006.4	9.79621	10.9531	8.07416	8.10617	10.0661	9.44651	9.07407	8.46154	8.58294	8.35458	19913.8	9.8231	10.8659	8.3313	7.94776	10.6474	9.00742	8.92436	8.45408	8.73106	8.19361	15921.1
YKL141W	SDH3	Cytochrome b subunit of succinate dehydrogenase (Sdh1p, Sdh2p, Sdh3p, Sdh4p), which couples the oxidation of succinate to the transfer of electrons to ubiquinone as part of the TCA cycle and the mitochondrial respiratory chain	5	3	5	6.57328	13.5134	7.47742	8.15013	8.87249	8.71799	9.55147	10.8375	9.05903	8.14424	5874.99	6.78311	14.6543	8.42184	7.86999	8.34402	7.97454	10.0073	10.4305	8.96762	7.46399	7698.94	6.55019	14.003	8.38874	7.57542	8.5526	8.30062	10.0338	10.5201	9.46132	7.54451	13732.5
YPL249C	GYP5	GTPase-activating protein (GAP) for yeast Rab family members; involved in ER to Golgi trafficking; exhibits GAP activity toward Ypt1p that is stimulated by Gyl1p, also acts on Sec4p; interacts with Gyl1p, Rvs161p and Rvs167p; involved in recruiting Rvs167p to the bud tip during polarized growth	17	19	19	8.12017	6.79229	10.1067	10.691	11.5118	5.33164	9.51145	9.41408	9.86796	9.53566	21641.3	8.4242	6.94735	9.84654	10.7992	11.6767	6.03002	8.78122	8.8349	10.0552	9.50986	36630.6	8.15026	7.17977	10.1463	10.2084	11.8274	5.76103	9.26512	9.09811	9.56396	9.69349	36076.5
YLR355C	ILV5	Bifunctional acetohydroxyacid reductoisomerase and mtDNA binding protein; involved in branched-chain amino acid biosynthesis and maintenance of wild-type mitochondrial DNA; found in mitochondrial nucleoids	94	130	120	12.3824	12.3696	8.55657	7.75232	10.2759	8.8951	8.71244	7.35435	7.29828	7.2787	241091	11.9502	12.4557	8.28146	7.71741	10.2967	8.7673	9.24724	7.44189	7.1979	7.57941	294721	12.2504	11.8495	8.03424	7.90445	10.2802	8.89575	9.39704	7.418	7.44384	7.44619	281431
YGR150C	CCM1	Mitochondrial 15s rRNA-binding protein; required for intron removal of COB and COX1 pre-mRNAs; contains pentatricopeptide repeat (PPR) motifs; mutant is respiratory deficient and has defective plasma membrane electron transport	1	6	2	9.40637	11.2192	7.52153	8.32364	10.1742	9.59602	8.1909	9.6576	9.09321	7.72262	721.349	9.72529	13.959	6.76839	7.85209	8.79667	9.97054	8.21599	9.43445	8.49395	7.69506	3204.03	8.51019	10.8554	8.34227	8.69454	9.38674	10.1467	8.57254	8.91272	8.99924	8.49944	4684.96
YNL272C	SEC2	Guanyl-nucleotide exchange factor for the small G-protein Sec4p; essential for post-Golgi vesicle transport and for autophagy; associates with the exocyst, via exocyst subunit Sec15p, on secretory vesicles	10	12	15	7.99198	9.02809	9.12692	10.2979	9.37723	9.17121	7.21401	9.27077	9.26411	10.1772	10583.7	9.2285	6.76477	9.14259	9.93007	9.32243	9.26195	8.27025	9.47864	9.37822	10.1246	31121.6	9.88749	7.14865	10.2683	9.13596	9.398	7.91799	9.0328	9.4673	9.29081	9.35916	24446.8
YIL124W	AYR1	NADPH-dependent 1-acyl dihydroxyacetone phosphate reductase found in lipid particles, ER, and mitochondrial outer membrane; involved in phosphatidic acid biosynthesis; required for spore germination; capable of metabolizing steroid hormones	9	11	9	9.42332	9.10214	10.7066	8.81809	7.94672	8.49509	9.07687	9.00214	8.69343	9.64033	25431.7	9.21069	9.0491	10.654	8.82723	7.87522	8.47111	9.90523	8.58471	9.10656	9.23954	16935	8.80859	9.16407	11.0326	9.31141	8.03216	8.557	8.99626	8.8554	8.94213	9.20377	16908.6
YPL214C	THI6	Bifunctional enzyme with thiamine-phosphate pyrophosphorylase and 4-methyl-5-beta-hydroxyethylthiazole kinase activities, required for thiamine biosynthesis; GFP-fusion protein localizes to the cytoplasm in a punctate pattern	1	4	9	6.70408	7.74902	11.4975	13.104	7.18024	7.85005	8.29285	8.43435	9.63978	10.4482	1540.19	9.0437	8.49748	10.3165	11.5746	8.28024	6.63378	9.78256	7.93227	9.02881	9.81819	5360.24	8.62213	9.03434	10.0904	12.0487	7.95261	6.54257	9.71652	8.32874	9.09617	9.42485	14012.3
YIL149C	MLP2	Myosin-like protein associated with the nuclear envelope, connects the nuclear pore complex with the nuclear interior; involved in the Tel1p pathway that controls telomere length	41	49	56	9.50645	10.3204	8.41023	9.22435	8.83214	9.25754	9.1205	8.70274	8.70183	8.82645	68241.6	9.44978	10.309	8.4975	9.38673	9.09187	9.5983	8.8259	8.77666	8.40008	8.56301	92703.1	9.4749	10.1939	8.57271	9.48685	9.01892	9.48512	8.89511	8.85021	8.40654	8.52086	114289
YNR006W	VPS27	Endosomal protein that forms a complex with Hse1p; required for recycling Golgi proteins, forming lumenal membranes and sorting ubiquitinated proteins destined for degradation; has Ubiquitin Interaction Motifs which bind ubiquitin (Ubi4p)	10	16	20	9.45631	9.96702	10.1671	9.34416	9.53273	8.83958	8.63506	8.56201	8.3331	8.0524	12621.2	9.25369	9.98965	10.0665	9.16011	9.28146	9.16985	8.50339	8.82298	8.30434	8.34626	16499.6	9.48893	9.88569	10.1367	9.56906	9.32666	8.99825	8.34014	8.44277	8.48771	8.23012	34630.6
YPL014W	YPL014W	Putative protein of unknown function; green fluorescent protein (GFP)-fusion protein localizes to the cytoplasm and to the nucleus	3	4	1	7.50413	9.20338	9.74708	7.37004	11.0263	6.40775	9.28879	9.9937	10.829	9.53725	3838.33	7.12565	9.25033	9.51307	7.15477	14.5501	4.56889	9.04654	9.91684	12.2427	7.56544	6744.6	8.2226	8.53437	10.1425	8.37139	12.1039	6.23043	9.00495	9.87013	10.6222	7.82233	6152.7
YJL041W	NSP1	Essential component of the nuclear pore complex, which mediates nuclear import and export, found in both the Nup82 and Nic96 complexes	20	19	19	10.1787	10.0293	8.98305	9.97542	9.61593	8.67167	8.58385	8.34582	8.39982	8.10371	32143.8	10.4897	10.1378	9.12452	9.85258	9.76967	8.68637	8.55954	8.13216	8.08718	8.06044	43046.5	10.2053	10.6494	8.80504	10.3821	9.16368	8.82904	8.19504	8.3487	7.96419	8.34795	46134.6
YAR007C	RFA1	Subunit of heterotrimeric Replication Protein A (RPA), which is a highly conserved single-stranded DNA binding protein involved in DNA replication, repair, and recombination	31	28	28	9.46081	9.28079	9.22814	9.04793	9.15522	8.7153	8.24323	9.34802	9.08511	9.34482	87922.4	9.68421	9.459	9.43127	9.25566	9.08597	8.45518	8.50031	8.97637	9.1316	8.93275	84584.1	9.51902	9.67269	9.6421	9.28295	9.08986	8.38698	8.3687	9.34043	8.75998	8.84262	80799.7
YLR129W	DIP2	Nucleolar protein, specifically associated with the U3 snoRNA, part of the large ribonucleoprotein complex known as the small subunit (SSU) processome, required for 18S rRNA biogenesis, part of the active pre-rRNA processing complex	20	18	27	6.2913	7.87602	7.523	8.24784	7.28868	10.6982	8.06061	8.1275	10.581	16.3031	27909.3	5.94153	7.66709	7.56389	8.23407	6.83896	10.9731	7.77498	8.17376	10.6673	17.1046	45746.2	6.12677	7.54235	7.38865	8.28086	6.73914	10.6868	7.63439	7.89331	10.9789	17.6192	53040
YDR484W	VPS52	Component of the GARP (Golgi-associated retrograde protein) complex, Vps51p-Vps52p-Vps53p-Vps54p, which is required for the recycling of proteins from endosomes to the late Golgi; involved in localization of actin and chitin	7	9	7	7.49194	8.86578	8.42359	8.95788	8.91791	9.9731	9.6305	9.86494	9.64517	9.15277	6133.21	7.69615	9.17376	8.17322	8.5227	8.92585	9.75763	10.1023	9.98766	9.05961	9.51363	12047.4	7.56694	9.24124	8.07586	8.7832	9.06326	9.88767	9.28825	10.2828	9.2151	9.51468	6966.72
YJR139C	HOM6	Homoserine dehydrogenase (L-homoserine:NADP oxidoreductase), dimeric enzyme that catalyzes the third step in the common pathway for methionine and threonine biosynthesis; enzyme has nucleotide-binding, dimerization and catalytic regions	32	38	28	10.3209	11.0335	9.14591	8.84798	9.10582	8.97886	8.71518	8.91061	8.38111	7.4474	92791.5	10.5671	11.9117	8.15857	8.57222	9.35867	8.73844	8.49294	9.35806	8.36532	7.39263	106969	10.4053	10.7945	9.07142	8.7751	9.27798	9.30983	8.03562	8.7753	8.65078	7.81869	106950
YLR188W	MDL1	Mitochondrial inner membrane half-type ATP-binding cassette (ABC) transporter, mediates export of peptides generated upon proteolysis of mitochondrial proteins, plays a role in the regulation of cellular resistance to oxidative stress	7	7	7	7.85291	9.19888	7.95473	7.69046	9.44777	10.4625	9.82545	10.499	9.05639	8.939	7689.83	7.27842	8.57376	8.16184	7.95016	8.94722	10.9179	8.90396	10.2496	9.85692	10.0635	11705.3	7.15115	9.13582	8.46929	7.69488	9.77204	10.6521	9.32957	10.3326	8.74507	9.65764	9061.05
YPL270W	MDL2	Mitochondrial inner membrane half-type ATP-binding cassette (ABC) transporter, required for respiratory growth at high temperature; similar to human TAP1 and TAP2 implicated in bare lymphocyte syndrome and Wegener-like granulomatosis	10	13	11	7.80783	9.65541	8.19515	7.98301	9.14076	9.4923	9.30282	11.1093	9.14286	9.09097	9553.99	8.17159	9.00702	8.36986	8.11622	8.95297	9.78355	9.17226	10.573	10	8.76321	19513	7.40736	8.95583	9.1543	8.12848	9.49811	9.65633	9.22147	10.3396	9.42959	9.14005	14069.5
YGR204W	ADE3	Cytoplasmic trifunctional enzyme C1-tetrahydrofolate synthase, involved in single carbon metabolism and required for biosynthesis of purines, thymidylate, methionine, and histidine; null mutation causes auxotrophy for adenine and histidine	52	60	68	10.6925	3.7454	10.5679	10.5218	9.3382	7.09639	10.4611	10.6044	9.25176	8.61447	122785	10.385	3.97814	10.6028	10.5631	9.17748	7.16557	10.0306	10.856	9.23306	8.93184	154175	10.1885	3.85878	10.3568	10.8405	9.35825	7.26551	10.014	10.8186	9.15629	9.03155	185035
YBR084W	MIS1	Mitochondrial C1-tetrahydrofolate synthase, involved in interconversion between different oxidation states of tetrahydrofolate (THF); provides activities of formyl-THF synthetase, methenyl-THF cyclohydrolase, and methylene-THF dehydrogenase	42	54	46	10.0985	9.9617	7.47125	7.57245	8.93632	11.2523	9.50912	9.20923	8.48712	8.42499	135956	10.5935	10.3865	7.53022	7.51878	8.66803	11.415	9.09853	9.05653	8.48341	8.16303	140562	10.3065	10.0856	7.83719	7.91605	8.61767	11.0703	8.69984	8.94626	8.6107	8.83581	145116
YNL212W	VID27	Cytoplasmic protein of unknown function; possibly involved in vacuolar protein degradation; not essential for proteasome-dependent degradation of fructose-1,6-bisphosphatase (FBPase); null mutants exhibit normal growth	26	25	27	8.84434	6.87652	9.3599	9.37582	10.1519	9.50045	9.97819	9.30677	9.00568	8.51006	47815.3	8.7783	7.1215	9.20958	9.92759	9.57328	9.82227	9.438	9.3688	8.46585	9.18705	62897.3	8.68231	6.82699	9.46141	9.62491	10.0171	9.64497	9.27545	9.13552	9.06825	9.17447	46965.4
YBL006C	LDB7	Component of the RSC chromatin remodeling complex; interacts with Rsc3p, Rsc30p, Npl6p, and Htl1p to form a module important for a broad range of RSC functions	1	3	2	10.2983	10.0295	7.94272	8.69271	8.99173	9.2257	8.67441	9.60847	9.24243	8.20064	4359.62	9.88741	9.30529	8.45266	7.43992	9.8617	9.50435	9.31425	9.07005	9.45129	8.64025	1578.82	7.93282	9.96639	6.40749	8.71807	10.4751	9.92196	10.706	11.3901	9.43829	5.9777	8360.57
YMR213W	CEF1	Essential splicing factor; associated with Prp19p and the spliceosome, contains an N-terminal c-Myb DNA binding motif necessary for cell viability but not for Prp19p association, evolutionarily conserved and homologous to S. pombe Cdc5p	6	6	8	9.21869	9.75846	7.57791	9.37782	8.88025	11.522	8.09566	8.76159	9.03053	8.70447	3846.95	10.0299	10.4037	8.22466	9.18087	8.73746	10.4576	7.8723	8.87238	8.51155	8.60362	11523.7	9.67238	10.4792	8.42399	9.68713	8.51009	10.2494	8.04503	8.36499	8.00317	9.46444	15061.7
YGL245W	GUS1	Glutamyl-tRNA synthetase (GluRS), forms a complex with methionyl-tRNA synthetase (Mes1p) and Arc1p; complex formation increases the catalytic efficiency of both tRNA synthetases and ensures their correct localization to the cytoplasm	84	85	87	9.9587	9.8244	9.3447	8.96931	7.96671	8.91412	9.39721	8.93874	8.91786	8.6691	282835	9.94933	9.76224	9.24853	9.42366	7.85015	8.93226	9.21706	9.00885	8.97859	8.54085	285132	10.1839	9.7861	9.36129	9.07108	7.86668	8.79976	9.22916	8.92931	8.94999	8.72486	283235
YOR278W	HEM4	Uroporphyrinogen III synthase, catalyzes the conversion of hydroxymethylbilane to uroporphyrinogen III, the fourth step in heme biosynthesis; deficiency in the human homolog can result in the disease congenital erythropoietic porphyria	6	9	7	8.96512	12.0432	7.61775	9.19645	9.88264	9.73376	7.40479	8.59891	7.57704	9.88785	16116.7	8.90744	9.75532	9.12006	8.49462	11.0144	8.45747	8.6559	9.13235	9.03516	8.33596	23507.2	8.78783	9.69871	9.4228	8.56979	11.112	8.03483	8.85926	9.05124	8.8198	8.56488	18721.8
YML086C	ALO1	D-Arabinono-1,4-lactone oxidase, catalyzes the final step in biosynthesis of dehydro-D-arabinono-1,4-lactone, which is protective against oxidative stress	24	27	29	8.2203	8.96564	9.09486	9.08372	8.23359	9.82214	10.4391	9.0956	9.03965	8.91729	72650	8.20585	9.13972	9.0403	8.77151	8.53906	9.69002	10.0519	8.94842	9.4152	9.10448	61317.1	8.03205	9.00037	9.14962	9.31311	8.36091	9.88104	9.9857	9.13501	9.13597	8.916	81109.5
YIR036C	IRC24	Putative benzil reductase;(GFP)-fusion protein localizes to the cytoplasm and is induced by the DNA-damaging agent MMS; sequence similarity with short-chain dehydrogenase/reductases; null mutant has increased spontaneous Rad52p foci	19	16	21	7.99664	10.4946	8.68121	9.15241	11.7322	7.26858	9.6616	8.93226	8.66398	8.2961	41465.3	8.27407	10.3132	8.90284	9.10465	11.794	6.91099	9.67965	8.63386	9.08732	8.21244	39289.8	8.12607	10.4873	9.28383	9.2702	11.6052	6.82515	9.55884	9.04143	8.62457	8.08845	37100
YDR393W	SHE9	Mitochondrial inner membrane protein required for normal mitochondrial morphology, may be involved in fission of the inner membrane; forms a homo-oligomeric complex	2	4	4	7.86656	8.0993	7.49767	8.63758	9.45946	9.10952	9.96842	11.1633	10.074	9.04772	646.586	6.94574	9.50632	7.65905	8.99644	8.50328	10.1508	8.74958	11.0479	9.85091	9.48403	5606.71	7.02462	8.68868	7.93632	8.19073	9.08024	9.27374	11.1446	10.2006	10.4097	8.97531	4357.06
YIR035C	YIR035C	Putative cytoplasmic protein of unknown function	7	7	8	6.01022	9.77492	10.1661	10.2329	12.4017	8.10198	10.2143	8.27133	9.79589	5.90095	12065.2	6.32827	9.96404	10.0666	10.2828	12.1173	8.44345	9.6037	8.96495	9.03023	6.0494	7651.74	6.55717	9.57708	10.5348	9.69291	11.8997	8.43841	10.3182	8.73639	9.23877	5.93143	17063.5
YHR023W	MYO1	Type II myosin heavy chain, required for wild-type cytokinesis and cell separation; localizes to the actomyosin ring; binds to myosin light chains Mlc1p and Mlc2p through its IQ1 and IQ2 motifs respectively	50	54	50	8.45908	9.93586	8.18497	10.0632	8.99618	9.65006	9.68331	8.85892	8.33882	8.72991	74388.9	8.55244	9.70305	8.01849	9.87766	9.06185	9.36627	9.58035	8.82941	8.75228	9.15582	84907	8.43783	9.88906	8.36412	10.2403	9.17012	9.51679	9.11737	8.79258	8.48541	8.88351	110072
YGL256W	ADH4	Alcohol dehydrogenase isoenzyme type IV, dimeric enzyme demonstrated to be zinc-dependent despite sequence similarity to iron-activated alcohol dehydrogenases; transcription is induced in response to zinc deficiency	3	7	6	10.2131	11.4017	7.60336	8.47513	8.81648	6.87398	9.06782	9.80727	8.77921	9.85537	2603.04	10.3534	11.0976	7.7738	8.95408	9.25657	7.56113	8.83358	9.2674	8.82891	9.00881	9858.46	10.1351	11.4084	7.58779	8.57158	9.35134	8.3153	8.51496	9.5583	8.32822	9.13769	8419.85
YCL026C-B	HBN1	Putative protein of unknown function; similar to bacterial nitroreductases; green fluorescent protein (GFP)-fusion protein localizes to the cytoplasm and nucleus; protein becomes insoluble upon intracellular iron depletion	4	2	1	8.91345	9.46797	4.24856	8.84825	15.2704	7.29148	8.4383	10.6303	8.85153	8.93837	6060.04	9.07804	9.92523	5.46558	7.75383	17.691	5.71514	6.52749	11.4867	8.54159	8.75059	3583.35	8.98202	9.75111	4.37438	8.65365	14.585	7.45009	8.38037	10.2859	8.7926	9.66574	331.27
YLR176C	RFX1	Major transcriptional repressor of DNA-damage-regulated genes, recruits repressors Tup1p and Cyc8p to their promoters; involved in DNA damage and replication checkpoint pathway; similar to a family of mammalian DNA binding RFX1-4 proteins	1	1	2	6.71071	8.14572	7.75277	8.74696	9.78763	10.7173	7.59235	7.75285	9.79171	13.973	854.713	7.20487	7.45045	7.49417	8.78878	8.86752	11.6323	8.60977	8.44627	9.70593	12.7017	703.281	7.57841	6.61616	6.3513	10.1045	8.79272	12.1047	8.97046	7.02235	10.0846	13.2642	1721.03
YGR282C	BGL2	Endo-beta-1,3-glucanase, major protein of the cell wall, involved in cell wall maintenance	12	18	16	9.25387	13.2911	11.1778	10.0352	8.69354	7.79353	7.12731	7.72997	7.48907	8.27582	22674	9.8166	13.6629	12.6295	9.56898	9.56176	7.05437	6.86865	7.02547	7.35347	7.35204	39334.6	9.77208	13.4541	11.9056	10.079	8.93881	7.65513	6.53709	7.31356	7.40073	7.83638	46603.6
YBL022C	PIM1	ATP-dependent Lon protease, involved in degradation of misfolded proteins in mitochondria; required for biogenesis and maintenance of mitochondria	35	62	46	10.1083	6.83127	10.1943	9.70368	10.1028	7.23185	9.56919	9.0085	9.19232	8.95025	84475.5	10.2777	6.59953	10.0805	9.87397	10.2085	7.3642	9.13973	9.30114	8.99228	9.08338	133170	10.0045	6.809	10.1268	9.92703	9.94084	7.4866	9.08856	9.1368	9.09473	9.28138	130030
YJR066W	TOR1	PIK-related protein kinase and rapamycin target; subunit of TORC1, a complex that controls growth in response to nutrients by regulating translation, transcription, ribosome biogenesis, nutrient transport and autophagy; involved in meiosis	11	21	22	7.59753	9.52026	8.64468	8.05519	9.31907	9.76743	9.47163	9.88743	9.48635	9.17306	17799	7.54086	8.64321	8.67076	8.21315	9.81082	9.53221	9.66099	9.49603	9.78701	9.55516	29006.1	7.33488	9.04596	8.89051	8.1785	9.49456	9.66334	9.49647	9.95655	9.33937	9.52791	48914.7
YKL203C	TOR2	PIK-related protein kinase and rapamycin target; subunit of TORC1, a complex that regulates growth in response to nutrients and TORC2, a complex that regulates cell-cycle dependent polarization of the actin cytoskeleton; involved in meiosis	11	17	10	8.11602	8.18033	8.86459	9.47505	9.34508	9.26271	8.4657	8.71441	9.16922	11.3368	16272	7.94813	8.09608	8.83205	9.50763	8.8481	9.34703	9.32275	8.57514	9.47478	10.9568	26418.2	8.09462	8.12146	8.74039	9.15133	8.92883	9.36979	9.29873	8.40229	9.39547	11.3989	11679.6
YLR100W	ERG27	3-keto sterol reductase, catalyzes the last of three steps required to remove two C-4 methyl groups from an intermediate in ergosterol biosynthesis; mutants are sterol auxotrophs	14	12	16	7.98651	9.2272	9.43033	9.53108	8.78499	10.4812	9.86497	7.38967	9.11871	9.10017	33058.2	8.09072	9.72324	9.77283	10.1355	7.7292	10.4296	9.80903	7.70114	8.37831	9.10996	45965.9	7.90611	9.13321	10.3042	9.54782	8.55562	10.0923	10.1623	7.36684	8.62602	9.21161	35520.4
YLR419W	YLR419W	Putative helicase with limited sequence similarity to human Rb protein; the authentic, non-tagged protein is detected in highly purified mitochondria in high-throughput studies; YLR419W is not an essential gene	20	33	33	7.99663	10.9501	8.07703	9.27661	9.25495	10.1597	9.36074	8.47099	8.76143	8.5991	38659.3	8.17378	10.8283	7.7273	9.3642	9.15261	10.0303	9.22606	8.64479	8.7679	8.97622	63506.9	7.83887	10.7596	7.95675	9.1432	9.35391	10.1592	9.14445	8.58838	8.94017	9.02793	68218.3
YIL009W	FAA3	Long chain fatty acyl-CoA synthetase, activates imported fatty acids; green fluorescent protein (GFP)-fusion protein localizes to the cell periphery	14	17	15	8.68528	4.7408	5.67543	8.02647	10.0543	10.2454	10.4693	11.5228	10.6719	10.8706	29331.8	9.32705	4.48994	6.27097	7.88629	9.53069	9.76785	9.79795	10.8705	11.1133	11.8952	58854.7	9.23666	4.45971	6.17425	7.96641	9.62382	9.76511	9.61095	11.1908	10.9434	11.9489	39744.2
YOR317W	FAA1	Long chain fatty acyl-CoA synthetase, activates imported fatty acids with a preference for C12:0-C16:0 chain lengths; functions in long chain fatty acid import; accounts for most acyl-CoA synthetase activity; localized to lipid particles	38	41	43	7.78528	7.12031	9.23744	8.48751	9.90488	8.42643	10.5475	10.8543	9.74316	8.80564	112215	7.83254	6.7474	9.20229	8.29921	10.7003	8.4829	10.753	10.1942	9.98434	8.72242	112456	8.12152	7.01735	9.47002	8.25274	9.98788	8.50737	9.95298	10.2629	10.048	9.30465	108679
YMR246W	FAA4	Long chain fatty acyl-CoA synthetase, activates imported fatty acids with a preference for C12:0-C16:0 chain lengths; functions in long chain fatty acid import; important for survival during stationary phase; localized to lipid particles	27	32	30	8.343	7.79685	8.93722	10.2413	8.22984	9.71207	10.5629	8.24233	8.91515	9.93397	84136.9	8.34082	7.78241	8.58453	10.8321	8.12547	9.63245	10.5172	7.72593	9.7517	9.59414	99425.9	8.36063	7.47622	9.25508	10.4693	8.53147	9.32915	10.4932	7.74016	9.49098	9.74169	90658.6
YDR490C	PKH1	Serine/threonine protein kinase involved in sphingolipid-mediated signaling pathway that controls endocytosis; activates Ypk1p and Ykr2p, components of signaling cascade required for maintenance of cell wall integrity; redundant with Pkh2p	4	9	6	8.00872	7.53855	9.50567	8.72615	11.4131	8.2113	10.3277	9.829	9.12515	8.21251	12846.3	7.0863	7.3641	9.78385	10.9837	9.9539	7.97918	8.88529	9.63354	9.68973	9.52254	15311	8.08226	7.8276	9.8541	9.75026	10.3427	7.71942	9.61114	9.36631	9.59354	8.75763	5851.91
YOL100W	PKH2	Serine/threonine protein kinase involved in sphingolipid-mediated signaling pathway that controls endocytosis; activates Ypk1p and Ykr2p, components of signaling cascade required for maintenance of cell wall integrity; redundant with Pkh1p	4	2	5	8.78775	7.95605	9.7339	9.70023	9.46346	8.56351	9.57256	9.09634	9.13995	8.88821	6040.71	8.0149	8.23369	10.3252	10.3337	9.14677	8.52645	8.7874	9.37739	9.52167	8.61717	1793.23	7.56687	7.62369	11.0331	11.0131	10.0349	7.80436	9.44542	9.18543	8.76331	8.42341	5914.11
YLR106C	MDN1	Huge dynein-related AAA-type ATPase (midasin), forms extended pre-60S particle with the Rix1 complex (Rix1p-Ipi1p-Ipi3p); acts in removal of ribosomal biogenesis factors at successive steps of pre-60S assembly and export from nucleus	106	101	95	6.15364	9.51126	7.25808	7.74915	7.54767	11.2137	8.96307	7.87853	10.4789	14.2273	147169	5.9369	9.44545	7.15559	7.73423	7.31028	11.4542	8.70308	7.67489	10.5895	14.9224	184139	6.00303	9.51485	7.18474	7.83221	7.38703	11.3095	9.08994	7.82014	10.6338	14.1347	214042
YAR019C	CDC15	Protein kinase of the Mitotic Exit Network that is localized to the spindle pole bodies at late anaphase; promotes mitotic exit by directly switching on the kinase activity of Dbf2p; required for spindle disassembly after meiosis II	1	2	1	6.93591	10.2082	9.07819	9.40882	8.81757	9.13172	9.35009	9.52254	10.2029	8.25211	1017.15	6.96332	8.87296	9.00194	10.1049	9.43601	9.51017	10.0244	9.51085	9.28757	8.16292	1525.39	7.03433	9.34727	9.11722	9.89007	9.92678	10.2307	9.16406	8.64333	8.87578	8.68215	1916.84
YMR031C	EIS1	Component of the eisosome that is required for proper eisosome assembly; similarity to Ykl050cp and Uso1p; the authentic, non-tagged protein is detected in a phosphorylated state in highly purified mitochondria in high-throughput studies	52	53	61	9.15758	9.09371	9.11579	9.74263	8.94137	9.84794	9.18661	8.70787	8.32571	8.78569	121471	9.57342	9.28343	9.2997	9.21193	9.44821	9.07502	9.7012	9.03732	8.28137	7.99376	157067	9.22755	9.2984	9.73148	8.8955	9.33543	9.11951	9.70779	8.98331	8.03179	8.58491	170466
YOR375C	GDH1	NADP(+)-dependent glutamate dehydrogenase, synthesizes glutamate from ammonia and alpha-ketoglutarate; rate of alpha-ketoglutarate utilization differs from Gdh3p; expression regulated by nitrogen and carbon sources	35	39	38	9.58098	10.4773	4.8732	4.02696	7.97966	7.19184	8.5983	22.9149	9.41893	5.85504	88232.3	9.82206	10.3927	4.64752	4.00342	7.95674	7.15572	8.09264	23.3596	9.68786	5.89322	76813.5	9.51602	10.2308	4.7794	3.95906	8.02998	7.16325	8.21897	23.1678	10.0445	5.88548	78926.4
YAL062W	GDH3	NADP(+)-dependent glutamate dehydrogenase, synthesizes glutamate from ammonia and alpha-ketoglutarate; rate of alpha-ketoglutarate utilization differs from Gdh1p; expression regulated by nitrogen and carbon sources	1	1	0	7.27165	7.21525	6.74169	7.71178	11.5282	8.70091	8.78157	11.5222	10.7029	10.77	469.289	0	0	0	0	0	0	0	0	0	0	505.059	7.47841	9.02589	8.31311	9.5734	10.2296	7.23843	11.0469	9.47712	7.81601	10.6996	0
YDR174W	HMO1	Chromatin associated high mobility group (HMG) family member involved in genome maintenance; rDNA-binding component of the Pol I transcription system; associates with a 5'-3' DNA helicase and Fpr1p, a prolyl isomerase	10	12	10	9.60845	10.5136	8.20543	8.58179	10.3495	10.4834	8.46987	8.75666	7.37041	8.56614	17411.1	10.0766	10.0755	7.93893	8.10193	10.8322	10.6997	8.52522	8.66706	7.66546	8.31991	19985.1	9.93651	10.4798	8.96879	8.23883	10.8182	9.77351	8.64304	8.57234	7.55637	7.94268	24798.3
YHR102W	KIC1	Protein kinase of the PAK/Ste20 family, required for cell integrity; physically interacts with Cdc31p (centrin), which is a component of the spindle pole body; part of the RAM network that regulates cellular polarity and morphogenesis	6	8	11	8.75309	10.3424	8.18991	9.7574	8.74324	8.82532	9.13924	8.83626	9.05996	9.25655	8841.92	9.23926	10.4295	8.80776	8.61296	8.91584	8.2756	8.96806	8.55577	9.39677	9.72593	8213.22	8.40323	9.49627	9.15699	9.83474	8.79491	8.54385	8.68225	8.87001	9.54781	9.56515	26573
YNL262W	POL2	Catalytic subunit of DNA polymerase (II) epsilon, a chromosomal DNA replication polymerase that exhibits processivity and proofreading exonuclease activity; also involved in DNA synthesis during DNA repair; interacts extensively with Mrc1p	10	23	21	6.5167	7.45036	8.36479	8.21092	8.48114	10.6759	9.21145	8.27699	10.5242	13.2586	21093.2	6.16303	7.15744	7.21388	7.57501	8.11287	11.7796	9.49235	8.42929	10.504	14.5001	38126.5	6.36448	7.05312	7.58363	7.85991	8.3784	11.4242	9.49124	8.56102	10.122	14.0802	38963.4
YER070W	RNR1	Major isoform of the large subunit of ribonucleotide-diphosphate reductase; the RNR complex catalyzes rate-limiting step in dNTP synthesis, regulated by DNA replication and DNA damage checkpoint pathways via localization of small subunits	29	28	32	8.34117	8.24664	7.71573	7.21555	9.84139	12.6248	7.75349	9.55064	9.68955	9.98531	68544.6	8.30313	7.99438	7.73167	7.08279	9.94266	12.8537	7.63253	9.34838	9.8466	10.1569	67560.7	8.4894	8.20301	7.50189	7.12214	9.76192	12.8649	7.3163	9.45685	10.0456	10.1862	91744.9
YIL066C	RNR3	Minor isoform of the large subunit of ribonucleotide-diphosphate reductase; the RNR complex catalyzes rate-limiting step in dNTP synthesis, regulated by DNA replication and DNA damage checkpoint pathways via localization of small subunits	6	7	7	11.1306	8.34234	8.93901	6.2924	10.8827	9.61329	5.65972	10.3074	7.31754	12.4623	14850.2	9.7034	8.36763	8.75194	6.64146	11.8353	7.66186	9.98432	7.83473	7.47202	12.7311	14754.9	11.5127	7.05742	6.69908	6.00336	12.1246	8.56655	10.3531	7.7111	9.88524	11.0246	17361.2
YLR363W-A	YLR363W-A	Putative protein of unknown function; green fluorescent protein (GFP)-fusion protein localizes to the nucleus	3	3	3	9.32029	14.2002	7.30032	8.79121	7.87529	11.5013	7.84764	8.61992	7.83851	7.60915	4185.39	9.99271	13.7937	6.91365	7.85029	7.83884	11.7254	7.68794	8.95015	8.24387	7.89997	5601.28	10.6739	14.437	7.52374	7.66268	7.81929	10.9646	8.09682	8.62954	7.53068	7.58756	6332.5
YGL122C	NAB2	Nuclear polyadenylated RNA-binding protein required for nuclear mRNA export and poly(A) tail length control; binds nuclear pore protein Mlp1p; autoregulates mRNA levels; related to human hnRNPs; nuclear localization sequence binds Kap104p	20	27	22	9.38979	8.81696	7.85209	9.56232	8.381	11.8076	7.53488	7.94466	9.15967	10.4963	46779	9.59825	9.12486	8.24936	9.09273	8.21334	11.6688	7.78179	8.29294	8.86339	10.0047	66617.1	9.77217	9.20105	8.29168	9.0365	8.28776	11.4084	8.1481	8.38884	8.73223	9.64434	71408.8
YOR151C	RPB2	RNA polymerase II second largest subunit B150, part of central core; similar to bacterial beta subunit	49	56	62	7.40493	7.10907	8.71372	9.805	8.28537	9.38038	9.70299	8.62256	10.1215	11.7945	101966	7.13459	6.90298	8.48325	9.93976	8.17382	9.32788	10.0887	8.60255	10.3202	11.9364	166783	7.31167	7.16505	8.2578	10.0242	8.25803	9.35153	9.79987	8.55871	10.1624	11.9981	162855
YNL218W	MGS1	Protein with DNA-dependent ATPase and ssDNA annealing activities involved in maintenance of genome; interacts functionally with DNA polymerase delta; homolog of human Werner helicase interacting protein (WHIP)	5	5	7	8.69398	9.7886	7.25601	8.18105	9.5809	11.1259	8.36062	8.37355	8.41583	11.1654	7571.32	9.47559	11.5238	7.47533	7.74542	9.25482	10.7177	8.23564	8.15564	8.45686	9.87459	10949.8	9.07362	9.93443	7.52558	7.82515	10.1943	10.4689	8.52856	7.66766	9.09705	10.608	11617.5
YPL096W	PNG1	Conserved peptide N-glycanase required for deglycosylation of misfolded glycoproteins during proteasome-dependent degradation; localizes to the cytoplasm and nucleus; activity is enhanced by interaction with Rad23p	5	3	5	8.5274	8.47301	8.88076	9.04799	9.83089	7.74408	9.05565	9.78033	9.44818	10.1225	5765.2	8.63827	8.40833	9.21469	9.50478	9.61098	8.35768	8.96446	9.27195	9.11232	9.82864	2906.12	9.17264	8.79881	9.40713	9.44864	9.68404	8.39671	8.83353	8.93429	8.72244	9.5051	10135.3
YDR348C	YDR348C	Protein of unknown function; green fluorescent protein (GFP)-fusion protein localizes to the cell periphery and bud neck; potential Cdc28p substrate	12	14	13	9.77807	9.99474	8.67466	9.22324	9.9037	8.7061	8.40388	9.21475	8.46198	8.53532	15172.9	10.1856	9.85825	8.43077	9.07001	9.64898	8.90168	7.91625	9.45685	8.56459	8.87995	16712.3	10.0873	9.62431	9.31158	9.07386	9.64939	8.68228	8.21816	9.21511	8.78519	8.26376	14383.7
YHR097C	YHR097C	Putative protein of unknown function; green fluorescent protein (GFP)-fusion protein localizes to the cytoplasm and the nucleus	10	8	11	7.42873	13.7603	10.3101	8.74035	10.0319	7.61455	7.97113	8.87439	8.14688	7.99491	12167.9	7.71479	14.3355	10.4838	8.71063	9.91369	7.57454	7.925	8.5334	8.20686	7.49796	12473.4	7.78364	13.9557	10.4637	8.40481	10.1798	7.67256	7.49864	8.90501	8.13283	7.92485	15721.1
YMR062C	ARG7	Mitochondrial ornithine acetyltransferase, catalyzes the fifth step in arginine biosynthesis; also possesses acetylglutamate synthase activity, regenerates acetylglutamate while forming ornithine	29	38	30	12.1735	13.6459	6.76561	6.40408	12.2327	10.1437	9.12142	7.15082	6.66464	6.57675	72080	12.3694	15.2079	5.58806	6.36854	12.4662	11.0614	9.06387	7.03457	5.83348	5.92544	79375	12.3659	14.5354	6.19358	6.63819	12.1917	10.554	9.18479	7.11293	5.99826	6.17415	68288.7
YBL104C	SEA4	Subunit of the SEA (Seh1-associated) complex, a coatomer-related complex that associates dynamically with the vacuole; has an N-terminal beta-propeller fold and a C-terminal RING motif; promoter contains multiple GCN4 binding sites	5	7	7	8.4073	8.65705	8.87103	9.80913	9.26758	9.26629	9.20218	8.71771	9.27834	9.43576	3944.94	8.89779	8.82107	8.33271	9.03518	9.2749	9.69914	8.87527	8.55829	9.16302	10.2526	9761.98	8.53752	8.77764	8.14072	9.38175	9.1304	10.2806	8.47861	8.83717	9.26886	10.0734	14659.2
YFL018C	LPD1	Dihydrolipoamide dehydrogenase, the lipoamide dehydrogenase component (E3) of the pyruvate dehydrogenase and 2-oxoglutarate dehydrogenase multi-enzyme complexes	58	45	46	10.2258	7.6086	9.49627	9.227	10.2868	7.39856	9.82149	10.381	8.80322	7.63517	129675	10.567	7.61395	10.0608	9.15074	10.1721	6.90348	9.41169	10.4143	8.8784	7.75806	128080	10.4211	7.46955	10.1156	9.46979	10.2523	7.13315	9.28148	10.1116	8.98504	7.66802	133975
YDL122W	UBP1	Ubiquitin-specific protease that removes ubiquitin from ubiquitinated proteins; cleaves at the C terminus of ubiquitin fusions irrespective of their size; capable of cleaving polyubiquitin chains	19	24	21	9.47157	9.09422	8.35178	9.43433	8.49655	10.7379	8.73361	8.68329	8.70304	9.21497	28000.7	9.86133	8.75219	8.53611	9.05095	9.36085	10.4305	8.48356	8.39748	8.71303	9.31381	55637.9	9.19673	9.3188	8.55527	9.66783	8.5845	10.8106	8.15629	8.75377	8.32296	9.53841	59640.1
YBR011C	IPP1	Cytoplasmic inorganic pyrophosphatase (PPase), homodimer that catalyzes the rapid exchange of oxygens from Pi with water, highly expressed and essential for viability, active-site residues show identity to those from E. coli PPase	67	64	64	10.3823	10.6244	8.77308	9.28594	7.98528	9.19808	8.22732	9.15802	8.89731	8.3695	173106	10.8494	10.4061	8.75844	8.98013	8.30967	9.10397	8.11882	9.22592	9.00443	8.15649	154126	10.2923	10.7671	8.85558	9.24554	8.03835	9.11617	8.19523	9.48868	8.76749	8.13748	212254
YPL085W	SEC16	COPII vesicle coat protein required for ER transport vesicle budding; Sec16p is bound to the periphery of ER membranes and may act to stabilize initial COPII complexes; interacts with Sec23p, Sec24p and Sec31p	56	54	65	9.21173	8.70013	9.26277	10.2914	9.30935	8.42689	9.41435	8.98171	8.88107	8.41277	71710.9	9.40597	8.41929	9.79344	10.1463	9.56436	8.23194	9.32534	8.9083	8.85708	8.24667	106475	9.43709	8.43908	9.83018	10.0579	9.56993	8.04313	9.35738	9.03592	8.81932	8.30811	135163
YJR051W	OSM1	Fumarate reductase, catalyzes the reduction of fumarate to succinate, required for the reoxidation of intracellular NADH under anaerobic conditions; mutations cause osmotic sensitivity	12	16	10	8.25166	7.11205	10.9307	9.42902	8.79795	8.03304	10.0807	9.07127	9.18802	10.0127	25070	8.26577	7.36443	10.9154	9.08465	9.17259	7.59335	10.8419	8.87021	9.15822	9.66058	36631.8	8.12467	7.37607	10.2517	9.32112	8.91193	7.96745	10.3546	9.22538	9.87763	9.49338	28703.4
YPL132W	COX11	Mitochondrial inner membrane protein required for delivery of copper to the Cox1p subunit of cytochrome c oxidase; association with mitochondrial ribosomes suggests that copper delivery may occur during translation of Cox1p	1	4	3	6.52799	11.9818	7.69874	11.7442	8.44768	7.97934	7.96734	10.418	8.05288	10.0733	232.749	9.2099	10.2699	8.9859	9.74825	7.45569	8.72788	8.98287	9.51422	9.06894	8.94539	5201.9	7.60586	11.6019	9.16082	9.24741	8.61234	8.2018	9.50801	9.45253	9.37079	8.14475	2517.27
YMR014W	BUD22	Protein required for 18S rRNA maturation and small ribosomal subunit biogenesis; cosediments with pre-ribosomal particles; mutation decreases efficiency of +1 Ty1 frameshifting and transposition, and affects budding pattern	8	9	12	8.7521	9.66466	7.40356	8.03796	8.84708	12.2371	8.20033	8.07359	9.26425	10.4718	16406	8.9548	9.86693	7.02691	8.27139	8.91302	12.082	7.79124	8.33278	9.22262	10.4335	18825.7	9.14104	9.89094	8.00441	8.40931	8.63305	11.0825	8.30836	8.56502	8.99052	9.89314	34331.2
YGR100W	MDR1	Cytoplasmic GTPase-activating protein for Ypt/Rab transport GTPases Ypt6p, Ypt31p and Sec4p; involved in recycling of internalized proteins and regulation of Golgi secretory function	11	11	13	7.66149	5.62915	9.78299	9.75906	9.94291	8.17559	10.0699	9.46529	10.184	10.2504	30866.8	7.4493	5.89868	9.34041	10.0373	9.81877	8.48602	10.2616	9.75166	9.77216	10.088	25932.8	7.23355	5.29512	10.4733	9.407	10.0663	8.33623	10.3375	9.12074	10.2497	10.3897	20877.7
YNL049C	SFB2	Component of the Sec23p-Sfb2p heterodimer of the COPII vesicle coat, required for cargo selection during vesicle formation in ER to Golgi transport; homologous to Sec24p and Sfb3p	20	19	18	8.04485	5.44323	10.2278	9.67632	9.39426	9.10261	10.536	8.60221	9.75752	10.138	33792.1	7.84495	5.47969	9.61424	9.71559	9.8837	9.29834	10.7272	8.93639	9.59176	9.80855	27842.2	7.45514	5.32207	9.89284	9.91832	9.47845	9.36847	10.8349	9.23495	9.31023	10.0903	36105.5
YIL109C	SEC24	Component of the Sec23p-Sec24p heterodimer of the COPII vesicle coat, required for cargo selection during vesicle formation in ER to Golgi transport; homologous to Sfb2p and Sfb3p	30	43	40	8.07734	5.24393	9.38347	9.8532	8.33536	10.4381	8.86504	9.12293	10.2426	11.3906	61959.9	8.24504	5.31105	9.99442	9.63327	8.28827	9.43545	9.70252	9.5125	10.1447	10.641	113018	8.24194	5.2332	9.89994	9.41269	8.49815	9.35618	10.3763	9.40537	10.0957	10.386	88635.1
YIL107C	PFK26	6-phosphofructo-2-kinase, inhibited by phosphoenolpyruvate and sn-glycerol 3-phosphate; has negligible fructose-2,6-bisphosphatase activity; transcriptional regulation involves protein kinase A	4	5	7	8.18117	5.84659	10.5116	9.66153	11.1738	8.2828	8.51336	9.36107	10.2409	9.14232	3561.34	9.12015	6.61005	10.3543	9.75156	11.9193	6.95814	8.95557	10.0697	9.24922	7.91723	8339.95	8.27077	6.35422	10.6724	10.0029	10.6712	7.36339	8.799	10.3058	10.056	8.41119	12811.7
YEL032W	MCM3	Protein involved in DNA replication; component of the Mcm2-7 hexameric complex that binds chromatin as a part of the pre-replicative complex	34	38	36	9.63639	7.90582	8.12496	8.68057	8.17789	10.0928	8.41437	10.0021	8.94538	10.9591	39735.9	9.8602	7.92155	8.44072	8.30906	8.58564	9.44641	8.54213	9.85527	9.38492	10.5877	64716	9.9743	7.67435	8.4752	8.23017	8.49387	9.66625	8.7529	9.66	9.02201	10.9649	88140.6
YKR052C	MRS4	Iron transporter that mediates Fe2+ transport across the inner mitochondrial membrane; mitochondrial carrier family member, similar to and functionally redundant with Mrs3p; active under low-iron conditions; may transport other cations	2	1	4	8.89548	10.8278	8.69593	6.46282	8.93161	12.3371	8.43789	8.41228	8.25032	9.69108	8011.05	9.13657	10.6783	8.20185	7.15298	8.31686	12.1738	8.26495	8.52981	8.53629	9.91721	903.433	10.257	9.19847	7.97038	7.94617	8.64652	13.1799	7.70676	9.79673	8.02681	8.21218	8936.59
YHR114W	BZZ1	SH3 domain protein implicated in the regulation of actin polymerization, able to recruit actin polymerization machinery through its SH3 domains, colocalizes with cortical actin patches and Las17p, interacts with type I myosins	17	18	19	9.99119	8.15927	9.60382	10.2953	9.36736	8.73567	8.98233	8.8374	8.32883	8.59251	30875.6	10.1033	8.2419	9.74284	9.91363	9.44607	8.49064	8.95723	8.8815	8.4922	8.63675	38176.8	9.807	8.60067	10.1221	10.3304	9.77817	8.20419	8.94801	8.95406	8.32634	7.82676	46725.5
YFL001W	DEG1	tRNA:pseudouridine synthase, introduces pseudouridines at position 38 or 39 in tRNA, important for maintenance of translation efficiency and normal cell growth, localizes to both the nucleus and cytoplasm; non-essential for viability	8	11	13	7.52323	10.8556	7.48747	7.21822	9.18174	11.7666	8.1942	8.68066	9.64238	10.402	11233.4	7.47616	10.8974	7.83002	7.13195	8.70042	12.4	7.82602	8.44673	9.81698	10.3683	12421.6	7.90441	10.4464	7.9799	7.01999	9.11858	11.4546	8.12458	8.64264	9.62	10.6271	22362.5
YNR027W	BUD17	Putative pyridoxal kinase, a key enzyme in vitamin B6 metabolism; involved in bud-site selection; diploid mutants display a random rather than a bipolar budding pattern; similarity to yeast BUD16 and human pyridoxal kinase (PDXK)	2	4	6	7.41297	13.5382	8.35424	8.56521	8.25426	9.75424	7.94572	8.79808	9.36985	8.91803	853.775	9.26847	13.0107	8.13897	8.9146	7.25399	10.305	8.22206	8.61224	9.05774	8.10983	9119.02	8.95188	12.9551	8.36458	9.17154	8.21203	9.51061	8.39222	8.17051	8.76783	8.40681	5796.97
YPR148C	YPR148C	Protein of unknown function that may interact with ribosomes, based on co-purification experiments; green fluorescent protein (GFP)-fusion protein localizes to the cytoplasm in a punctate pattern	26	28	27	8.89583	7.5956	9.70587	10.6077	10.0452	7.8281	10.2233	8.70102	8.82699	8.45582	46631.6	9.2185	8.04341	9.66633	10.3125	10.0791	7.46608	9.84639	8.88602	8.86924	8.51876	41358.6	9.09179	7.91959	9.8344	11.0297	9.49622	7.6909	9.15974	9.04701	9.04064	8.57435	64553.3
YBR162C	TOS1	Covalently-bound cell wall protein of unknown function; identified as a cell cycle regulated SBF target gene; deletion mutants are highly resistant to treatment with beta-1,3-glucanase; has sequence similarity to YJL171C	6	9	6	9.28195	12.581	8.73309	8.67979	8.69961	10.2143	7.53825	8.1964	7.8651	9.11692	17284.6	10.3065	14.9453	9.09723	7.95435	9.04534	9.72675	7.7143	7.6449	7.16093	7.30838	18870.7	9.65011	13.1499	9.01166	8.50881	9.01244	10.0234	7.53479	8.23983	7.9575	7.83074	13506.3
YOL151W	GRE2	3-methylbutanal reductase and NADPH-dependent methylglyoxal reductase (D-lactaldehyde dehydrogenase); stress induced (osmotic, ionic, oxidative, heat shock and heavy metals); regulated by the HOG pathway	17	20	15	7.79091	3.16976	8.25855	5.6342	10.9432	7.7417	7.19375	12.4398	12.8818	14.9505	48844.4	7.48704	2.97663	8.55829	5.57053	10.8682	7.67051	7.28073	12.3988	13.0658	15.1162	65821.5	7.92911	3.21364	8.62194	5.79325	10.6011	7.56891	7.16667	12.6187	12.5797	14.8493	67753
YDR541C	YDR541C	Putative dihydrokaempferol 4-reductase	2	2	1	7.36088	10.2273	8.19598	10.5122	9.34163	9.72645	9.77416	7.93752	8.3943	9.43237	3363.21	8.88479	8.28088	10.195	11.7203	10.1416	8.05691	9.40752	7.95359	8.16005	8.07225	3384.82	8.11593	7.30306	9.18838	11.1058	9.23908	8.2933	10.936	8.12416	8.8773	9.69728	538.273
YDR164C	SEC1	Sm-like protein involved in docking and fusion of exocytic vesicles; binds to assembled SNARE complexes at the membrane and stimulates membrane fusion; localization to sites of secretion (bud neck and bud tip) is dependent on SNARE function	10	14	17	8.39237	6.05622	9.46797	9.41566	9.42818	9.90817	9.12883	9.43146	9.3144	10.3902	22704.2	9.02031	6.27339	9.35751	9.26285	9.67961	9.76348	9.5724	9.20924	9.25745	9.5075	30352.4	9.24824	6.60002	8.94304	9.83639	9.24129	9.5005	9.99924	9.8863	8.98763	8.66407	38667.3
YIL111W	COX5B	Subunit Vb of cytochrome c oxidase, which is the terminal member of the mitochondrial inner membrane electron transport chain; predominantly expressed during anaerobic growth while its isoform Va (Cox5Ap) is expressed during aerobic growth	4	4	5	4.45956	16.5641	9.74571	9.68995	9.36857	6.02618	9.09897	10.9571	9.02171	5.91138	10728.4	4.96736	16.4763	9.80853	8.90565	9.61876	5.62824	9.80657	11.0757	9.21793	5.38795	9607.39	4.97197	15.6064	9.27121	8.82087	9.00321	5.47628	10.0654	11.1704	10.0115	6.51486	13561.1
YNL052W	COX5A	Subunit Va of cytochrome c oxidase, which is the terminal member of the mitochondrial inner membrane electron transport chain; predominantly expressed during aerobic growth while its isoform Vb (Cox5Bp) is expressed during anaerobic growth	2	4	2	7.95788	19.6826	5.97679	5.46945	7.47101	14.1404	7.70641	8.11734	6.66945	7.72959	4399.08	6.16936	24.7532	4.19169	5.96065	5.26092	15.8315	5.80513	9.73367	4.76388	8.39601	4223.06	6.74246	21.9572	4.72443	6.26735	6.25127	15.5852	6.4525	8.76128	6.13732	8.07646	3084.48
YDR035W	ARO3	3-deoxy-D-arabino-heptulosonate-7-phosphate (DAHP) synthase, catalyzes the first step in aromatic amino acid biosynthesis and is feedback-inhibited by phenylalanine or high concentration of tyrosine or tryptophan	22	20	18	10.7983	11.6557	9.11592	7.99655	9.63279	10.2512	8.55929	8.8826	6.99467	7.00025	45025.8	10.244	10.5445	8.85957	8.41817	9.66987	10.4005	9.36708	8.09385	7.68068	7.62289	53341.1	9.95368	10.9614	8.43015	8.36773	9.48981	10.3982	9.63566	8.37866	7.84229	7.4677	64326.9
YBR249C	ARO4	3-deoxy-D-arabino-heptulosonate-7-phosphate (DAHP) synthase, catalyzes the first step in aromatic amino acid biosynthesis and is feedback-inhibited by tyrosine or high concentrations of phenylalanine or tryptophan	24	28	25	11.1597	12.6729	8.26486	7.27165	10.5469	9.46116	8.15455	9.05297	7.77002	6.52941	62919.8	10.6554	12.9155	8.33493	7.1712	10.8501	8.69853	9.74113	8.44278	7.73056	6.3868	82824.4	11.9048	12.7479	7.16167	6.32301	10.6923	9.61775	10.4754	8.38258	7.74249	5.90092	102140
YML093W	UTP14	Subunit of U3-containing Small Subunit (SSU) processome complex involved in production of 18S rRNA and assembly of small ribosomal subunit	25	24	26	10.3958	10.6448	7.29534	9.01061	8.56285	11.8831	7.69152	7.75825	7.84422	9.84308	49022.7	11.0569	10.2573	7.50646	8.9004	8.47834	12.4352	7.19069	6.93355	8.17826	9.95311	38118.7	10.9377	10.7714	7.99928	8.85799	8.39427	11.1676	7.39203	7.71263	8.10403	9.57123	54611.6
YGL226W	MTC3	Protein of unknown function; green fluorescent protein (GFP)-fusion protein localizes to the mitochondrion; mtc3 is synthetically sick with cdc13-1	0	1	0	0	0	0	0	0	0	0	0	0	0	0	0	0	0	0	0	0	0	0	0	0	1498.23	6.81064	11.4281	8.885	9.24461	9.34009	9.81583	9.50501	8.57836	8.60148	8.70508	0
YBR245C	ISW1	Member of the imitation-switch (ISWI) class of ATP-dependent chromatin remodeling complexes; ATPase that forms a complex with Ioc2p and Ioc4p to regulate transcription elongation, and a complex with Ioc3p to repress transcription initiation	31	40	35	7.52244	5.37004	7.86432	8.62356	8.41982	10.8758	9.09542	8.92435	10.7767	13.5088	44967.8	7.17728	5.61855	7.73381	8.7098	8.3384	11.586	8.38664	8.7405	10.5363	14.0857	81142	7.3273	5.56563	8.16218	8.93087	8.07635	10.836	8.43479	8.57855	10.8914	14.0978	68877.4
YOR304W	ISW2	ATP-dependent DNA translocase involved in chromatin remodeling; ATPase component that, with Itc1p, forms a complex required for repression of a-specific genes, INO1, and early meiotic genes during mitotic growth	6	4	12	6.57692	7.38518	7.53279	8.79521	8.31993	10.9682	8.61986	8.89771	10.3733	13.5068	6782.66	6.90218	7.05764	8.09373	8.68401	8.46378	10.3735	8.5891	8.48196	10.8114	13.46	8259.09	5.84963	6.57187	7.81195	8.80371	7.83275	10.6563	8.24197	8.36603	12.0842	14.6802	24898.2
YPL004C	LSP1	Primary component of eisosomes, which are large immobile patch structures at the cell cortex associated with endocytosis, along with Pil1p and Sur7p; null mutants show activation of Pkc1p/Ypk1p stress resistance pathways; member of the BAR domain family	21	24	23	8.17983	10.4399	11.2979	9.61529	10.1322	6.80502	9.51535	9.84481	8.37373	6.65506	38598.9	7.37982	10.5668	11.0997	9.72035	9.86119	6.85732	10.5015	9.64687	8.44471	6.819	48882.1	8.23724	9.94903	10.7903	9.18486	10.0689	6.98059	11.1495	8.82917	9.12662	6.5968	58466.6
YGR086C	PIL1	Primary component of eisosomes, which are large immobile cell cortex structures associated with endocytosis; null mutants show activation of Pkc1p/Ypk1p stress resistance pathways; detected in phosphorylated state in mitochondria; member of the BAR domain family	38	38	35	9.40663	10.6633	8.88058	7.80228	10.4296	8.69509	10.3535	9.01621	8.71303	6.92456	75619.3	8.37032	10.4495	9.0508	8.40791	10.0068	9.30477	9.98676	9.33235	8.73073	7.25941	70643.3	8.69002	10.4014	9.2468	8.07285	10.223	8.89269	10.4187	9.284	8.80486	6.89798	69685.7
YDR294C	DPL1	Dihydrosphingosine phosphate lyase, regulates intracellular levels of sphingolipid long-chain base phosphates (LCBPs), degrades phosphorylated long chain bases, prefers C16 dihydrosphingosine-l-phosphate as a substrate	11	16	21	6.40731	6.90527	10.4258	11.3727	8.5542	9.7972	10.0159	8.33901	8.80406	10.2939	19363.8	6.62847	6.54894	10.2869	10.7522	9.32548	9.25155	11.4465	7.96435	9.13409	9.54092	30154.1	6.63936	6.89711	10.4599	11.0467	8.42783	9.62453	10.5534	8.00077	8.79675	10.4406	36377.5
YGL049C	TIF4632	Translation initiation factor eIF4G, subunit of the mRNA cap-binding protein complex (eIF4F) that also contains eIF4E (Cdc33p); associates with the poly(A)-binding protein Pab1p, also interacts with eIF4A (Tif1p); homologous to Tif4631p	22	23	28	9.22412	7.88614	8.83939	9.51551	9.92797	8.6847	9.30881	9.37279	9.13944	9.00762	46625.1	9.38509	7.70713	9.16606	9.41866	10.2137	8.47776	9.25879	9.37639	9.18986	8.71525	68054.2	9.28269	7.7103	9.45613	9.35827	10.2745	8.08966	9.25874	9.0852	9.30096	9.09038	57004
YGR162W	TIF4631	Translation initiation factor eIF4G, subunit of the mRNA cap-binding protein complex (eIF4F) that also contains eIF4E (Cdc33p); interacts with Pab1p and with eIF4A (Tif1p); also has a role in biogenesis of the large ribosomal subunit	43	51	57	10.7926	7.10537	9.29451	9.19809	8.30748	8.36609	9.11603	9.59851	9.40609	9.72947	125611	10.7132	7.35625	9.29775	9.47583	8.21292	8.50278	8.78598	9.60621	9.23844	9.73854	163491	10.6038	7.24713	9.39896	9.58039	8.14109	8.54712	8.64416	9.23163	9.44575	10.053	154689
YML123C	PHO84	High-affinity inorganic phosphate (Pi) transporter and low-affinity manganese transporter; regulated by Pho4p and Spt7p; mutation confers resistance to arsenate; exit from the ER during maturation requires Pho86p	21	17	17	7.47788	2.03873	17.2789	7.99275	12.7759	2.02299	6.90895	15.8243	14.6981	3.85417	42959.5	7.48888	1.4968	18.7055	8.51722	12.0941	1.30852	5.65314	15.893	16.1163	3.63023	30364.9	6.91959	1.66567	18.9621	8.61126	11.9702	1.41477	5.81708	16.4527	15.6223	3.51299	52406.7
YNR046W	TRM112	Subunit of tRNA methyltransferase (MTase) complexes in combination with Trm9p and Trm11p; subunit of complex with Mtq2p that methylates Sup45p (eRF1) in the ternary complex eRF1-eRF3-GTP; deletion confers resistance to zymocin	6	7	4	10.8229	16.2468	8.18626	7.29121	8.74359	9.4881	8.09008	7.73392	7.13152	7.14059	13257.4	9.97303	17.1047	7.11148	6.94996	9.25778	10.0139	8.51909	7.49651	6.92608	7.56764	27855.8	10.8004	16.2382	6.98577	7.18379	8.41076	10.3626	8.64682	7.73075	7.33438	7.23408	19957.6
YML076C	WAR1	Homodimeric Zn2Cys6 zinc finger transcription factor; binds to a weak acid response element to induce transcription of PDR12 and FUN34, encoding an acid transporter and a putative ammonia transporter, respectively	3	6	6	8.20345	12.8274	7.09327	7.95271	9.188	10.4375	8.72467	8.96856	8.54782	8.97156	3324.05	8.06649	12.4588	7.23098	8.16905	9.19294	10.1774	8.58926	9.20959	8.7009	9.10878	9552.22	8.08437	10.6439	8.17481	8.65077	9.49492	9.57492	8.68941	9.13891	9.04606	9.41854	8678.07
YEL055C	POL5	DNA Polymerase phi; has sequence similarity to the human MybBP1A and weak sequence similarity to B-type DNA polymerases, not required for chromosomal DNA replication; required for the synthesis of rRNA	14	18	14	5.64455	4.68187	6.93563	6.82253	6.46839	14.0297	7.87103	7.96762	11.1812	19.4651	24775.3	5.9528	4.70894	6.27477	7.04748	6.47111	14.6449	7.8648	7.74458	10.9664	19.2615	43686.6	6.39228	5.16487	6.04441	6.73386	6.92554	13.6052	9.15137	8.01378	11.1262	17.7634	23672.5
YKR003W	OSH6	Member of an oxysterol-binding protein family with overlapping, redundant functions in sterol metabolism and which collectively perform a function essential for viability; GFP-fusion protein localizes to the cell periphery	14	25	21	8.52199	9.04	11.473	8.16774	10.279	7.79621	9.32819	8.59848	9.07343	8.61525	30398.9	8.13919	9.46184	11.9691	7.47367	11.2201	7.52843	9.53058	8.67325	8.38061	8.54869	90357.3	8.38366	8.97781	11.2337	7.62783	11.4359	7.73987	9.96388	8.68928	9.23161	7.65481	85900.3
YHR001W	OSH7	Member of an oxysterol-binding protein family with seven members in S. cerevisiae; family members have overlapping, redundant functions in sterol metabolism and collectively perform a function essential for viability	16	14	17	8.46467	8.21909	9.21755	9.20235	11.1683	8.21696	10.1991	9.56766	9.38618	7.24721	43762.9	8.70701	8.3092	9.33228	9.09033	11.1635	8.1088	9.8977	9.61821	9.39865	7.27542	37789.7	8.62008	8.45696	9.33506	9.0697	10.8369	8.1877	9.64835	9.6137	9.52753	7.62298	54511
YDR480W	DIG2	MAP kinase-responsive inhibitor of the Ste12p transcription factor, involved in the regulation of mating-specific genes and the invasive growth pathway; related regulators Dig1p and Dig2p bind to Ste12p	2	2	1	9.87836	9.0404	8.53953	8.10041	9.90408	9.84793	7.68652	11.5927	7.94412	8.3798	903.799	9.54777	9.0155	9.53122	7.96269	8.90349	8.72978	9.32975	10.7006	8.65766	8.5527	1329.64	10.1191	9.42649	9.31956	7.45268	9.44421	8.68368	8.82349	9.47076	9.55689	8.63187	358.954
YGR218W	CRM1	Major karyopherin, involved in export of proteins, RNAs, and ribosomal subunits from the nucleus; exportin	43	35	40	7.23702	7.30398	9.12023	9.14425	8.74857	9.17501	9.51456	9.7001	9.93809	11.0534	90590.5	7.01016	7.3946	9.26212	9.06128	8.40456	8.87622	10.4508	9.18277	10.0761	11.2018	94252.5	7.67087	7.06247	8.42693	8.35765	8.80712	9.16524	11.5313	9.19824	10.5914	10.1041	115605
YDR099W	BMH2	14-3-3 protein, minor isoform; controls proteome at post-transcriptional level, binds proteins and DNA, involved in regulation of many processes including exocytosis, vesicle transport, Ras/MAPK signaling, and rapamycin-sensitive signaling	13	16	20	8.88163	11.7469	9.93252	9.04572	9.20813	8.21898	8.84292	9.21235	8.57447	7.21417	10951.9	8.8701	11.1421	9.94016	9.33134	8.01346	8.42684	8.95385	9.35312	9.14138	7.72901	16170.2	8.56596	12.0525	10.0722	8.98354	8.83201	8.08735	9.01898	9.16985	8.3818	7.74672	17294.7
YER177W	BMH1	14-3-3 protein, major isoform; controls proteome at post-transcriptional level, binds proteins and DNA, involved in regulation of many processes including exocytosis, vesicle transport, Ras/MAPK signaling, and rapamycin-sensitive signaling	16	25	17	8.21068	9.15589	9.11454	10.6763	9.41787	8.06863	9.28768	9.26645	9.50427	8.1881	17892.5	8.83544	10.7678	9.83674	9.1526	8.8991	8.0986	9.20799	9.74038	9.56854	6.79154	26383.2	9.50625	10.5757	11.0858	8.25482	9.09917	7.52096	9.01987	9.52837	8.9628	7.36708	15010.5
YML013W	UBX2	Protein involved in ER-associated protein degradation; proposed to coordinate the assembly of proteins involved in ERAD; contains a UBX (ubiquitin regulatory X) domain and a ubiquitin-associated (UBA) domain	9	8	7	6.45196	7.13308	9.71106	10.9977	8.72163	9.42272	9.17971	8.52214	9.65749	11.1303	11871.9	6.88971	7.7008	9.79691	11.4113	8.24073	8.30205	9.62906	8.83188	9.32674	10.7592	17412.3	7.43524	7.64562	9.81289	10.759	8.8213	8.42866	10.0902	8.57521	9.43929	9.87856	14442.2
YKL005C	BYE1	Negative regulator of transcription elongation, contains a TFIIS-like domain and a PHD finger, multicopy suppressor of temperature-sensitive ess1 mutations, probably binds RNA polymerase II large subunit	4	4	3	8.18548	9.65811	7.9122	8.26707	9.55454	8.63229	8.73182	9.33057	10.094	10.5614	2910.62	8.84951	11.0696	7.63352	8.58956	8.8077	9.15172	8.33107	9.51183	8.59232	10.3876	8925.48	9.33293	10.3533	7.75745	7.87397	9.87628	8.61009	8.97037	8.87672	9.43677	9.83004	7375.65
YLR357W	RSC2	Component of the RSC chromatin remodeling complex; required for expression of mid-late sporulation-specific genes; involved in telomere maintenance	23	20	19	8.78935	8.40708	8.65457	9.00146	8.76767	10.4398	8.5716	9.00993	9.21768	10.0734	47840.5	9.54426	9.10775	8.45849	8.93338	8.44996	10.4048	8.91518	8.90697	8.96189	9.22123	28419.4	9.23708	8.65831	8.64729	9.08981	8.43039	10.5311	8.62235	9.47523	8.74827	9.47264	30981.6
YFL034W	YFL034W	Putative integral membrane protein that interacts with Rpp0p, which is a component of the ribosomal stalk	5	8	9	9.44278	6.47456	8.89089	9.09025	9.43748	8.38395	9.29879	9.45861	9.23875	11.2102	11042.5	9.02045	6.01722	8.63005	8.95245	10.2107	8.84257	9.82393	9.519	9.52131	10.3874	19093.4	9.46642	6.54825	9.2038	9.46755	9.36733	8.25997	9.11665	9.10789	9.17354	11.1853	22614.6
YGL211W	NCS6	Protein required for thiolation of the uridine at the wobble position of Gln, Lys, and Glu tRNAs; has a role in urmylation and in invasive and pseudohyphal growth; inhibits replication of Brome mosaic virus in S. cerevisiae	2	3	4	8.74146	9.77471	7.69469	8.91116	8.04597	10.5307	8.90839	9.07913	9.8748	9.36943	1393.51	8.44703	9.69776	9.18308	9.40129	8.27765	9.25465	9.97572	8.87018	9.24801	8.54485	9999.89	9.14829	10.823	8.9602	9.49521	7.7964	9.60084	9.30486	8.44336	8.73632	8.59166	9428.23
YNL023C	FAP1	Protein that binds to Fpr1p, conferring rapamycin resistance by competing with rapamycin for Fpr1p binding; accumulates in the nucleus upon treatment of cells with rapamycin; has similarity to D. melanogaster shuttle craft and human NFX1	8	9	8	8.98812	9.10992	8.19067	8.92212	9.90092	10.3532	8.91775	8.61153	8.52256	9.40255	5926.7	9.41836	8.60585	8.27091	8.9425	9.68052	10.9253	8.5938	9.15967	8.2685	9.02843	17809.6	9.99944	8.83293	8.25933	8.75903	9.71233	10.0618	8.82492	8.78354	8.75587	8.9275	9136.44
YLR244C	MAP1	Methionine aminopeptidase, catalyzes the cotranslational removal of N-terminal methionine from nascent polypeptides; function is partially redundant with that of Map2p	33	34	39	10.2186	10.1563	8.29828	9.66317	7.43566	9.69618	8.99139	9.03648	9.21775	8.19116	55253.8	10.1434	9.99195	8.39971	10.1312	7.26916	10.1045	8.35578	9.04496	8.91791	8.53285	62887.9	9.824	10.2197	8.76206	10.2239	7.19153	9.77397	8.42589	9.22932	8.8995	8.3412	84211.4
YER006W	NUG1	GTPase that associates with nuclear 60S pre-ribosomes, required for export of 60S ribosomal subunits from the nucleus	39	37	32	10.5314	9.04108	8.57978	9.05691	8.36603	11.0506	8.47191	8.98384	7.97603	8.86081	87153.7	10.2782	8.69352	8.60951	8.91811	8.5719	10.5795	9.45777	8.34766	8.40135	9.05022	80346.6	10.3491	8.63051	7.96433	9.38268	8.17936	11.1089	9.00727	8.32479	8.71466	9.24304	97380.1
YKR028W	SAP190	Protein that forms a complex with the Sit4p protein phosphatase and is required for its function; member of a family of similar proteins including Sap4p, Sap155p, and Sap185p	15	21	22	7.855	7.66635	8.78601	8.92221	8.93209	9.73087	10.4349	9.44248	9.86095	9.29301	27787.6	7.74198	7.33593	8.84737	9.19862	9.01053	9.57287	10.1063	9.65378	9.75577	9.68121	44584	7.59322	7.58056	9.17149	9.24565	8.754	9.546	9.80702	9.76126	9.59606	9.85555	48890.9
YMR002W	MIC17	Mitochondrial intermembrane space protein, required for normal oxygen consumption; contains twin cysteine-x9-cysteine motifs	3	4	8	8.97997	13.3059	8.8801	9.79012	8.43374	8.42685	7.58079	9.12326	8.33097	8.03012	8277.18	9.05788	13.2579	8.67233	9.72651	8.06272	9.25492	6.75589	8.50848	8.46206	9.13222	10419.9	8.56098	14.3991	9.11225	9.51091	8.40283	8.81354	7.26182	8.85295	7.55096	8.43569	16341.3
YFR006W	YFR006W	Putative X-Pro aminopeptidase; green fluorescent protein (GFP)-fusion protein localizes to the cytoplasm; YFR006W is not an essential gene	26	27	23	9.77876	6.48489	9.90104	7.79958	10.2449	10.3993	6.74168	10.6469	9.47593	9.46956	51246.5	10.2671	6.8906	10.1648	7.35111	10.5356	9.42885	6.56531	10.4677	9.35982	9.89621	53895.9	10.7588	5.99555	9.36982	7.28588	10.0779	10.1549	6.76255	10.7083	9.89137	9.93518	78773.5
YDL097C	RPN6	Essential, non-ATPase regulatory subunit of the 26S proteasome lid required for the assembly and activity of the 26S proteasome; the human homolog (S9 protein) partially rescues Rpn6p depletion	15	18	21	7.97379	6.63956	9.61469	9.66609	8.60413	9.46634	9.37604	8.7997	10.043	10.7503	28149.1	7.83609	6.37048	9.91186	9.17125	8.70593	9.00139	9.51163	8.86776	10.3633	11.176	42460.1	7.92986	6.30446	9.47675	9.19955	8.7928	9.18249	9.48884	8.99483	10.5175	11.0171	74584.1
YCL014W	BUD3	Protein involved in bud-site selection and required for axial budding pattern; localizes with septins to bud neck in mitosis and may constitute an axial landmark for next round of budding	24	35	34	8.41299	9.93997	8.26692	9.47788	9.80717	8.66587	9.49835	9.21773	8.75446	8.85708	36259.6	7.80964	9.48338	8.37412	9.67552	10.2263	8.78045	9.64203	9.3493	9.01857	8.53416	58808.9	8.33854	9.71642	8.15753	9.68725	10.03	8.91106	9.32704	8.88683	8.96504	8.88436	62170.8
YNL243W	SLA2	Transmembrane actin-binding protein involved in membrane cytoskeleton assembly and cell polarization; adaptor protein that links actin to clathrin and endocytosis; present in the actin cortical patch of the emerging bud tip; dimer in vivo	34	35	37	8.6761	6.9654	10.9496	10.0563	8.69715	7.88958	9.03385	9.19335	9.56558	9.88074	48597.3	8.95652	6.57718	10.9804	9.84745	8.56106	7.30468	9.15132	10.1739	9.2186	10.1544	67179.4	8.61649	6.51661	10.3233	10.4003	8.94796	7.46081	8.8463	10.0231	9.74713	10.0073	90881
YJL014W	CCT3	Subunit of the cytosolic chaperonin Cct ring complex, related to Tcp1p, required for the assembly of actin and tubulins in vivo	64	75	77	9.6358	8.1132	9.11959	9.07958	9.11727	9.57804	9.11347	9.06919	8.93235	9.15617	157717	9.65368	7.88555	9.2555	8.96625	8.84167	9.64825	9.37182	8.99106	9.03358	9.26468	216811	9.54885	8.0862	9.27946	8.84699	9.02644	9.63195	9.35308	8.95222	9.01322	9.17535	212061
YMR012W	CLU1	eIF3 component of unknown function; deletion causes defects in mitochondrial organization but not in growth or translation initiation, can rescue cytokinesis and mitochondrial organization defects of the Dictyostelium cluA- mutant	80	81	85	8.63377	4.23802	10.1982	9.17309	9.95895	8.37315	10.1285	9.90643	10.1057	10.211	196551	8.73875	4.17979	10.3051	9.17201	10.0643	8.08316	10.2192	9.97963	10.1799	10.0025	185009	8.6497	3.88787	10.4796	9.13623	10.0748	8.18987	10.2112	9.99984	10.2079	10.0761	240537
YDR148C	KGD2	Dihydrolipoyl transsuccinylase, component of the mitochondrial alpha-ketoglutarate dehydrogenase complex, which catalyzes the oxidative decarboxylation of alpha-ketoglutarate to succinyl-CoA in the TCA cycle; phosphorylated	18	16	20	8.70656	8.92344	10.5561	10.5401	9.6978	7.39906	9.30188	9.7024	8.62619	7.41926	27886.5	8.60194	9.46005	10.1478	10.5557	9.6455	7.45199	9.35456	9.90213	8.3277	7.44465	25109.1	8.62169	8.82247	10.202	10.9263	9.84758	7.2332	10.1679	9.5313	8.70668	6.83351	33922.6
YGL254W	FZF1	Transcription factor involved in sulfite metabolism, sole identified regulatory target is SSU1, overexpression suppresses sulfite-sensitivity of many unrelated mutants due to hyperactivation of SSU1, contains five zinc fingers	3	4	3	8.66948	12.0035	8.59221	7.71531	9.66015	10.8723	8.03647	8.16171	8.40708	8.79879	3322.83	9.2211	10.0778	8.46564	8.33437	8.8882	11.8306	7.66105	8.07827	8.9463	9.38385	11139.9	8.76043	11.1154	8.59663	7.88502	9.12817	11.7816	7.06955	8.51093	8.39789	9.6865	4186.36
YNR043W	MVD1	Mevalonate pyrophosphate decarboxylase, essential enzyme involved in the biosynthesis of isoprenoids and sterols, including ergosterol; acts as a homodimer	27	24	27	9.69075	9.63147	9.20388	9.45632	8.66519	8.23105	9.36447	8.5756	8.77275	9.30543	53679.2	9.0195	9.8298	9.18902	9.16745	8.74259	8.55147	9.63589	8.70019	8.59256	9.49072	53384	9.20339	9.80802	8.78251	8.99128	8.75025	8.76085	9.46345	9.01724	8.45204	9.67601	69304.1
YOR204W	DED1	ATP-dependent DEAD (Asp-Glu-Ala-Asp)-box RNA helicase, required for translation initiation of all yeast mRNAs; mutations in human DEAD-box DBY are a frequent cause of male infertility	64	67	70	9.76716	9.87323	8.59018	8.61168	8.44367	8.90486	8.84869	9.52036	9.19756	9.1531	110344	9.81618	9.44393	8.45106	8.93272	7.91649	9.13265	8.42505	9.06828	10.4246	9.30502	88714.3	9.98241	9.71237	8.60022	8.68565	8.38048	9.09881	8.69085	9.17575	9.29644	9.28483	112360
YNL112W	DBP2	Essential ATP-dependent RNA helicase of the DEAD-box protein family, involved in nonsense-mediated mRNA decay and rRNA processing	88	86	77	9.81331	10.2349	7.61831	7.81681	8.32681	10.1514	8.55641	9.63982	9.38078	9.38978	135451	9.97052	10.326	7.5516	7.54112	8.38921	9.96669	8.76956	9.46451	9.43656	9.51657	141000	10.153	10.6112	7.33468	7.71802	8.09029	10.18	8.7344	9.71385	9.14749	9.23885	185024
YPL119C	DBP1	Putative ATP-dependent RNA helicase of the DEAD-box protein family; mutants show reduced stability of the 40S ribosomal subunit scanning through 5' untranslated regions of mRNAs	5	2	1	8.34783	7.65814	8.80264	11.6372	11.9394	5.61176	10.3964	8.48941	9.02542	8.95922	3852.57	8.84935	8.03093	9.11588	12.3894	12.1376	4.88881	10.3446	8.36905	7.92933	8.84934	7787.16	9.82578	8.36848	9.96557	10.4865	10.2001	5.95602	9.86668	9.31902	9.02005	7.87907	2990
YNL283C	WSC2	Partially redundant sensor-transducer of the stress-activated PKC1-MPK1 signaling pathway involved in maintenance of cell wall integrity and recovery from heat shock; secretory pathway Wsc2p is required for the arrest of secretion response	4	4	4	8.96701	12.128	11.1699	8.91062	8.11492	9.73136	7.25908	6.78065	7.01971	10.8239	6383.39	10.1536	12.0913	11.7752	8.51662	7.53572	9.53688	8.04364	6.90664	6.76817	9.58754	7893.27	9.2361	12.7033	11.8876	9.05478	8.23988	9.33837	7.33556	7.01437	6.79351	9.30328	9859.78
YNL255C	GIS2	Translational activator for mRNAs with internal ribosome entry sites; associates with polysomes and binds to a specific subset of mRNAs; ortholog of human ZNF9/CNBP, a gene involved in myotonic dystrophy type 2	21	23	25	10.2664	13.7001	8.19652	8.6166	7.28029	10.0658	7.77625	8.53623	8.43553	8.02554	42313.2	10.9991	14.1187	8.49972	7.78241	7.41257	9.69765	7.96139	8.60452	8.1575	7.68775	47390.3	10.1965	13.3973	8.43866	8.67764	7.48384	9.95157	7.72086	8.33121	8.40612	8.30328	57501.9
YDR483W	KRE2	Alpha1,2-mannosyltransferase of the Golgi involved in protein mannosylation	19	22	25	7.41404	8.30226	9.56854	9.08624	7.63208	10.1721	9.8922	8.54627	9.91997	10.3999	31354.6	7.80712	8.21025	9.94646	9.03671	7.89814	9.76027	10.0698	8.65179	9.62537	9.89905	48171.7	7.71	8.17639	9.7508	8.63002	7.87159	9.8476	10.1741	8.57302	10.0036	10.1751	56387.6
YOL078W	AVO1	Component of a membrane-bound complex containing the Tor2p kinase and other proteins, which may have a role in regulation of cell growth	4	7	6	8.84951	10.9236	7.57594	9.15047	8.65257	10.4381	8.00769	8.78332	8.7345	9.80728	2832.01	9.32256	12.0676	7.97259	8.58514	9.75286	9.77549	8.54753	8.39695	8.33907	8.13997	6884.27	9.10451	11.4111	7.45495	8.90292	9.53583	9.85908	8.50133	8.69407	8.40136	9.04664	5367
YKR057W	RPS21A	Protein component of the small (40S) ribosomal subunit; nearly identical to Rps21Bp and has similarity to rat S21 ribosomal protein	0	1	0	0	0	0	0	0	0	0	0	0	0	0	0	0	0	0	0	0	0	0	0	0	1403.05	10.5949	7.86403	8.99087	8.16139	8.86241	9.22031	10.0709	8.44681	9.80935	8.89482	0
YML069W	POB3	Subunit of the heterodimeric FACT complex (Spt16p-Pob3p), which associates with chromatin via interaction with Nhp6Ap and Nhp6Bp, and reorganizes nucleosomes to facilitate access to DNA by RNA and DNA polymerases	38	42	36	10.157	7.72775	9.07513	9.57142	9.73637	8.3671	9.63885	9.12879	8.96241	8.53261	96450.3	9.18107	7.8064	8.36486	9.65637	10.5603	8.51305	10.2861	9.43939	8.77445	8.32525	101203	10.0626	7.62406	8.9575	9.85397	10.0381	8.29703	10.0584	8.9701	8.76829	8.27088	119055
YOL145C	CTR9	Component of the Paf1p complex; binds to and modulates the activity of RNA polymerases I and II; required for expression of a subset of genes, including cyclin genes; contains TPR repeats; possibly involved in transcription elongation as a component of the PAF complex	17	17	17	6.02526	7.05284	8.21867	9.09004	7.22321	11.2139	8.26075	8.28308	10.7552	14.8671	45941.2	6.56429	7.03549	7.92548	8.74829	7.74055	10.9025	8.34374	8.4623	10.5156	14.6817	42693.4	6.31753	6.67813	8.2978	8.38052	7.29729	11.1212	8.64701	8.36535	11.0455	14.7543	47108.5
YDR359C	EAF1	Component of the NuA4 histone acetyltransferase complex; acts as a platform for assembly of NuA4 subunits into the native complex; required for initiation of pre-meiotic DNA replication, likely due to its requirement for expression of IME1	6	5	3	8.25793	8.5041	8.25582	8.70753	9.70477	10.6693	7.93002	9.20601	9.27998	10.425	7353.32	9.02473	7.96738	8.25422	9.39355	9.28232	9.71631	8.30683	9.3524	9.30364	10.3044	5077.1	7.83969	8.90723	8.94747	9.0449	9.5838	10.2667	8.72023	8.79086	9.2822	9.53367	3561.35
YOR069W	VPS5	Nexin-1 homolog required for localizing membrane proteins from a prevacuolar/late endosomal compartment back to the late Golgi apparatus; structural component of the retromer membrane coat complex; forms a retromer subcomplex with Vps17p	23	31	26	9.11179	9.8555	8.86293	9.52305	9.18201	9.15555	8.84099	8.84895	8.70286	8.81834	54902.7	8.87929	10.366	8.61007	9.58432	9.18229	9.42297	8.75852	9.04546	8.27889	8.76798	76775.2	9.26914	9.77187	8.57572	9.47499	9.41477	8.97644	9.19072	8.98364	8.79638	8.4516	86435.8
YPR119W	CLB2	B-type cyclin involved in cell cycle progression; activates Cdc28p to promote the transition from G2 to M phase; accumulates during G2 and M, then targeted via a destruction box motif for ubiquitin-mediated degradation by the proteasome	1	1	0	8.65179	10.4178	7.02157	10.6874	8.79503	9.29126	10.5811	6.99563	8.40097	10.0579	1781.58	0	0	0	0	0	0	0	0	0	0	3044.47	9.02152	10.8133	7.80544	10.3622	8.73521	8.99045	10.5551	8.20681	7.30055	9.09727	0
YDR150W	NUM1	Protein required for nuclear migration, localizes to the mother cell cortex and the bud tip; may mediate interactions of dynein and cytoplasmic microtubules with the cell cortex	79	90	86	7.91579	9.67179	7.88818	9.45453	9.29311	9.6062	10.6832	9.39017	8.97379	8.02429	125926	7.89731	9.28779	8.24499	9.31841	9.68529	9.54373	10.5835	9.15502	9.05389	8.12358	129207	8.00501	9.31335	8.50011	9.53506	9.39741	9.54814	10.1757	9.159	9.15132	8.1254	155823
YPL116W	HOS3	Trichostatin A-insensitive homodimeric histone deacetylase (HDAC) with specificity in vitro for histones H3, H4, H2A, and H2B; similar to Hda1p, Rpd3p, Hos1p, and Hos2p; deletion results in increased histone acetylation at rDNA repeats	11	9	9	7.79931	10.1239	8.73105	9.30491	9.19226	9.3303	8.24306	9.41679	9.43455	9.33934	19410.5	8.97286	10.1081	8.80874	9.01251	8.96401	8.91504	8.45152	9.71619	9.42498	8.53128	13524.7	8.90552	10.1254	9.06704	9.1456	8.90228	8.95275	8.56008	9.58393	9.05268	8.61432	16383.8
YLR248W	RCK2	Protein kinase involved in the response to oxidative and osmotic stress; identified as suppressor of S. pombe cell cycle checkpoint mutations; similar to CaM (calmodulin) kinases	21	20	17	11.0278	7.12294	8.89804	9.37302	8.80217	9.26945	9.09563	8.93331	8.38731	10.006	41297.9	11.2658	6.98066	8.99805	9.50232	8.93467	9.32442	8.6378	8.87886	8.38018	10.0203	30454.6	11.0781	6.80301	9.06433	9.9626	8.76753	9.27125	8.42411	8.7972	8.48815	10.2359	34506.8
YBL091C	MAP2	Methionine aminopeptidase, catalyzes the cotranslational removal of N-terminal methionine from nascent polypeptides; function is partially redundant with that of Map1p	22	23	26	10.7514	9.00533	8.90578	9.04255	9.32698	8.05814	10.0857	8.90759	8.50122	8.30314	45471.7	10.5125	8.08469	9.24833	9.16087	9.42034	7.86528	10.0404	9.33208	8.80053	8.46486	72619.1	10.4599	8.18324	9.04529	8.85047	9.53504	7.91751	9.86415	9.0488	9.04572	8.95647	108501
YNL121C	TOM70	Component of the TOM (translocase of outer membrane) complex responsible for recognition and initial import steps for all mitochondrially directed proteins; acts as a receptor for incoming precursor proteins	52	51	43	9.07046	7.65642	9.62088	10.5944	8.4332	7.6913	10.0435	8.92092	9.70514	9.16052	148458	9.26684	7.59792	9.88155	10.3963	8.68892	7.52546	9.91428	8.82852	9.66094	9.15127	174091	8.84712	7.6224	10.0582	10.6745	8.61016	7.56294	9.73646	8.90448	9.74013	9.12653	172891
YER048C	CAJ1	Nuclear type II J heat shock protein of the E. coli dnaJ family, contains a leucine zipper-like motif, binds to non-native substrates for presentation to Ssa3p, may function during protein translocation, assembly and disassembly	26	34	35	9.51009	9.14737	9.06819	10.8621	9.19786	10.3724	7.8963	7.96113	8.39386	8.49531	54824.2	9.42239	10.4709	9.6867	8.1727	11.0845	8.85321	10.4686	8.36584	7.27264	7.11393	98192.6	10.1205	9.39886	8.5843	9.06496	10.0587	9.64257	9.8789	7.99033	8.62962	7.54567	99562.2
YDR361C	BCP1	Essential protein involved in nuclear export of Mss4p, which is a lipid kinase that generates phosphatidylinositol 4,5-biphosphate and plays a role in actin cytoskeleton organization and vesicular transport	11	16	14	7.79193	12.7631	7.53728	8.31256	7.31693	13.4857	6.9772	8.03062	8.58311	10.153	25398.5	8.0286	12.3009	7.42112	7.59395	7.90151	12.9127	8.46344	8.81056	8.96645	8.48104	28377.6	8.49533	12.1161	7.49556	7.71459	8.39816	11.7367	9.37336	8.90571	9.15069	7.54892	37648.3
YPL212C	PUS1	tRNA:pseudouridine synthase, introduces pseudouridines at positions 26-28, 34-36, 65, and 67 of tRNA; nuclear protein that appears to be involved in tRNA export; also acts on U2 snRNA	18	23	24	8.382	8.65627	8.47861	9.29921	8.74922	11.7347	7.1397	7.95234	9.21979	11.3412	78834.8	10.3734	8.61773	7.93281	8.78826	7.63729	11.2532	7.88424	8.55791	9.03601	10.8319	70785.9	10.3363	8.84908	7.64298	8.55474	7.99803	11.5365	8.2443	8.5781	8.60902	10.5632	93138.6
YNL054W	VAC7	Integral vacuolar membrane protein involved in vacuole inheritance and morphology; activates Fab1p kinase activity under basal conditions and also after hyperosmotic shock	4	7	3	8.03882	9.36654	7.51907	11.1865	8.27851	12.2208	6.28155	7.25069	9.50268	11.3072	4746.81	8.64694	12.3077	9.48695	9.18475	7.10805	9.27993	8.90223	8.25758	9.20609	8.51921	7157.88	8.06485	10.176	8.50404	9.79645	8.64456	10.4589	8.57942	8.72756	8.90821	9.04453	5220.31
YOR254C	SEC63	Essential subunit of Sec63 complex (Sec63p, Sec62p, Sec66p and Sec72p); with Sec61 complex, Kar2p/BiP and Lhs1p forms a channel competent for SRP-dependent and post-translational SRP-independent protein targeting and import into the ER	20	21	18	7.24886	8.16921	9.52847	9.21605	7.70869	11.005	9.79132	7.93475	9.01626	11.3221	47399.9	7.42605	8.3455	10.1287	9.40183	7.70487	10.5177	9.10572	8.16102	8.898	11.2066	55507.9	7.12198	8.38155	9.76522	9.69793	7.24331	11.4348	9.24512	8.22075	8.49728	11.2945	61183.5
YNL045W	LAP2	Leucyl aminopeptidase yscIV (leukotriene A4 hydrolase) with epoxide hydrolase activity, metalloenzyme containing one zinc atom; green fluorescent protein (GFP)-fusion protein localizes to the cytoplasm and nucleus	25	25	28	9.21781	5.56669	10.7209	10.2659	8.54188	8.41249	8.77211	10.0333	9.49027	9.89501	66229.6	9.57684	5.3632	10.901	10.3062	8.47989	8.46415	8.67288	9.77749	9.69784	9.66582	73660	8.8797	5.54785	11.02	9.95368	8.62534	8.35078	8.96453	9.64255	9.83747	10.0756	79514.2
YML109W	ZDS2	Protein with a role in regulating Swe1p-dependent polarized growth; interacts with Cdc55p; interacts with silencing proteins at the telomere; implicated in the mitotic exit network through regulation of Cdc14p localization; paralog of Zds1p	7	11	8	9.12399	12.8555	7.64804	8.86177	9.48549	8.98579	8.54861	8.70143	8.17649	8.50474	8370.75	8.88442	11.994	7.92705	9.69005	9.56454	8.81794	8.14332	9.00304	8.20269	8.66985	12916.8	8.67476	12.073	7.83784	9.39542	9.29346	9.09825	8.21613	8.9232	8.16671	9.22428	10584
YLL008W	DRS1	Nucleolar DEAD-box protein required for ribosome assembly and function, including synthesis of 60S ribosomal subunits; constituent of 66S pre-ribosomal particles	30	32	26	8.59593	9.31088	7.39081	9.23979	8.47502	10.057	9.07693	9.77475	9.23283	9.77223	57301.3	8.79961	10.0123	7.30869	9.41863	8.53204	10.6859	8.90843	8.65463	8.82031	9.75503	80970.5	8.3218	9.00336	7.70721	10.9155	7.55843	10.7581	8.16927	7.67901	9.6486	11.1158	53983.9
YMR307W	GAS1	Beta-1,3-glucanosyltransferase, required for cell wall assembly and also has a role in transcriptional silencing; localizes to the cell surface via a glycosylphosphatidylinositol (GPI) anchor; also found at the nuclear periphery	26	27	30	9.7601	8.75769	10.6749	9.31576	9.99135	9.47927	7.94775	7.23745	8.11879	9.62345	60293.9	10.0458	9.03712	11.0069	9.58423	10.0463	8.62617	8.59027	7.5608	7.70555	8.69815	64633.5	10.3195	8.82831	11.3717	8.91001	9.86816	8.85229	8.04188	7.38219	8.19583	9.14184	75551.9
YGR279C	SCW4	Cell wall protein with similarity to glucanases; scw4 scw10 double mutants exhibit defects in mating	5	6	7	9.45334	10.8316	8.82197	9.37472	9.17463	9.51354	8.33759	8.91689	8.04219	8.43066	8654.82	9.90831	11.3508	8.52804	8.99698	8.83839	9.67223	8.29158	8.5129	7.98606	8.82078	12367.2	9.86454	11.3168	9.09313	8.95672	8.65648	9.79201	8.15655	8.81496	7.93776	8.32327	18747.5
YOR001W	RRP6	Nuclear exosome exonuclease component; has 3'-5' exonuclease activity; involved in RNA processing, maturation, surveillance, degradation, tethering, and export; has similarity to E. coli RNase D and to human PM-Sc1 100 (EXOSC10); mutant displays reduced transcription elongation in the G-less-based run-on (GLRO) assay	18	18	14	6.83277	7.28911	7.78028	8.23916	8.52844	13.3219	7.92837	9.12764	9.72267	12.2153	30725.2	7.18964	6.94645	7.24034	7.90368	8.20343	14.228	7.77027	8.43256	10.1161	12.8552	34604.8	7.23854	7.06597	7.84823	7.97122	8.57162	13.045	8.10468	8.76795	10.0296	12.2869	33627.4
YCR069W	CPR4	Peptidyl-prolyl cis-trans isomerase (cyclophilin), catalyzes the cis-trans isomerization of peptide bonds N-terminal to proline residues; has a potential role in the secretory pathway	4	1	3	8.62463	11.7282	9.90488	9.36758	8.31529	7.8827	8.98135	8.64132	8.78382	8.65551	5648.2	9.3528	11.605	10.0397	9.11231	9.33709	7.39419	8.90647	8.31314	8.54617	8.30993	1388.02	6.85772	13.6354	9.64273	11.0582	6.63059	8.58754	7.1479	8.73207	8.6921	9.88913	10343.3
YDL064W	UBC9	SUMO-conjugating enzyme involved in the Smt3p conjugation pathway; nuclear protein required for S- and M-phase cyclin degradation and mitotic control; involved in proteolysis mediated by the anaphase-promoting complex cyclosome (APCC)	5	7	5	9.84917	14.4913	8.9575	8.45442	8.43955	8.56977	8.8332	8.29044	8.03804	6.94709	12500.3	9.77845	14.0355	8.34247	8.30616	9.08943	8.64156	8.66317	8.49581	8.45025	7.1082	24643.5	9.57928	14.0331	8.69775	8.74457	8.77071	8.69196	8.28927	8.74462	7.94836	7.41126	19918.8
YDL171C	GLT1	NAD(+)-dependent glutamate synthase (GOGAT), synthesizes glutamate from glutamine and alpha-ketoglutarate; with Gln1p, forms the secondary pathway for glutamate biosynthesis from ammonia; expression regulated by nitrogen source	99	103	104	8.39479	4.37339	7.97377	7.50543	9.66868	10.6216	10.3804	12.0176	10.1739	9.84619	216020	8.44034	4.58023	7.97453	7.30955	10.0151	10.252	10.8061	11.9918	10.2521	9.30896	220921	8.61258	4.53635	8.05841	7.27361	9.82792	10.2699	10.6071	11.9269	10.2159	9.61697	251298
YJL197W	UBP12	Ubiquitin carboxyl-terminal hydrolase, ubiquitin-specific protease present in the nucleus and cytoplasm that cleaves ubiquitin from ubiquitinated proteins	12	9	9	7.51073	7.54899	8.77424	8.76901	9.83866	9.27436	9.11419	9.25489	9.63028	11.2207	10313.5	7.37189	7.34442	8.92805	8.53568	9.8848	8.8938	9.08623	8.63124	10.3869	11.8598	13162.4	7.54407	7.70046	9.17895	9.15608	9.34531	8.6803	8.78689	8.84088	10.2523	11.4175	24714.1
YCL034W	LSB5	Protein of unknown function; binds Las17p, which is a homolog of human Wiskott-Aldrich Syndrome protein involved in actin patch assembly and actin polymerization; may mediate disassembly of the Pan1 complex from the endocytic coat	4	5	4	9.34454	8.5154	9.10036	9.99841	8.32962	8.57127	9.60429	9.5077	8.81312	9.11612	6239.45	9.45318	8.58429	9.42708	9.63253	9.03325	8.58321	9.38275	9.39394	8.7654	8.65306	5155.51	8.77878	8.42315	9.42715	9.76913	9.16915	8.72968	9.01496	9.24074	8.97776	9.37037	5177.73
YOR358W	HAP5	Subunit of the heme-activated, glucose-repressed Hap2/3/4/5 CCAAT-binding complex, a transcriptional activator and global regulator of respiratory gene expression; required for assembly and DNA binding activity of the complex	0	0	1	0	0	0	0	0	0	0	0	0	0	0	8.11	10.2417	9.61792	11.0788	10.1723	7.80791	8.53045	8.95585	8.57184	7.78727	0	0	0	0	0	0	0	0	0	0	0	1901.53
YNL071W	LAT1	Dihydrolipoamide acetyltransferase component (E2) of pyruvate dehydrogenase complex, which catalyzes the oxidative decarboxylation of pyruvate to acetyl-CoA	32	28	32	9.69436	9.16209	9.85761	10.0587	7.98751	8.83264	9.68294	9.70075	8.34693	7.56223	113318	9.78646	9.18839	9.74874	10.2965	7.89714	9.16703	9.20691	9.74648	8.37565	7.47748	120487	9.69637	8.68514	10.0752	11.1684	7.73139	8.93297	8.9801	9.4204	8.5026	7.69186	133568
YMR244C-A	YMR244C-A	Putative protein of unknown function; green fluorescent protein (GFP)-fusion protein localizes to both the cytoplasm and nucleus and is induced in response to the DNA-damaging agent MMS; YMR244C-A is not an essential gene	6	3	5	8.76689	13.246	9.32649	8.2769	11.002	8.47607	8.36951	8.54472	8.08151	6.78263	10795.5	7.92447	13.3964	9.69414	8.94566	9.10238	8.68817	8.49949	9.25246	7.855	7.53455	8372.1	8.19901	13.9453	9.31147	8.75063	10.5035	8.48214	7.67644	8.81412	8.08429	7.15438	8667.12
YPL226W	NEW1	ATP binding cassette protein that cosediments with polysomes and is required for biogenesis of the small ribosomal subunit; Asn/Gln-rich rich region supports [NU+] prion formation and susceptibility to [PSI+] prion induction	86	100	96	10.1614	4.24806	8.76348	9.17897	8.64222	10.4685	9.40731	9.40855	9.5268	11.1449	195385	10.2185	4.10433	8.81547	9.38379	8.62574	10.9782	8.82461	9.07385	9.6201	11.267	247265	10.344	4.23786	8.84789	9.4195	8.60931	10.5828	8.81032	9.54182	9.51571	10.996	250292
YPR036W	VMA13	Subunit H of the eight-subunit V1 peripheral membrane domain of the vacuolar H+-ATPase (V-ATPase), an electrogenic proton pump found throughout the endomembrane system; serves as an activator or a structural stabilizer of the V-ATPase	29	35	31	8.68011	6.67016	10.6325	9.72917	7.2639	9.02891	9.84739	9.55083	9.85405	9.66246	89076.5	8.74997	6.66668	11.1083	9.99335	7.14457	9.14935	9.643	9.43618	9.75774	9.25105	131143	8.63552	6.61044	10.6219	9.88297	7.01918	9.45609	9.50742	9.51874	9.7659	9.87837	91739.4
YLR369W	SSQ1	Mitochondrial hsp70-type molecular chaperone, required for assembly of iron/sulfur clusters into proteins at a step after cluster synthesis, and for maturation of Yfh1p, which is a homolog of human frataxin implicated in Friedreich's ataxia	9	12	18	9.10994	10.8943	8.45395	8.74713	10.3365	9.66672	8.63369	8.96598	7.90296	8.1863	14888.4	9.77692	10.3352	8.90554	8.66091	10.3106	9.15366	8.80296	8.62307	8.27134	8.06629	25992.6	9.81677	10.2129	9.10434	8.69209	10.1188	8.90667	8.6463	8.56857	8.9834	7.86756	43652.2
YJR045C	SSC1	Hsp70 family ATPase, constituent of the import motor component of the Translocase of the Inner Mitochondrial membrane (TIM23 complex); involved in protein translocation and folding; subunit of SceI endonuclease	72	82	78	10.6385	7.36381	10.8551	11.9286	10.0526	6.60994	8.90368	7.94346	8.86176	7.70723	126423	11.1754	7.61134	11.1503	11.589	10.5043	6.48942	8.76904	7.57182	8.85283	7.17758	147321	10.8152	7.32838	10.9038	12.3454	10.0368	6.70563	8.17469	7.54976	9.04955	7.9538	122979
YGR281W	YOR1	Plasma membrane ATP-binding cassette (ABC) transporter, multidrug transporter mediates export of many different organic anions including oligomycin; similar to human cystic fibrosis transmembrane receptor (CFTR)	24	27	25	6.76925	6.08654	9.23764	9.55496	8.55176	7.35716	7.50615	11.4246	11.6992	12.7658	38241.9	6.39437	5.50042	9.62639	8.75523	8.65677	6.74862	7.42779	11.8452	12.494	13.4968	48948	6.71034	5.78343	8.94639	8.92572	8.75892	7.34196	7.83218	11.8461	12.2967	12.4608	41054.2
YLL048C	YBT1	Transporter of the ATP-binding cassette (ABC) family involved in bile acid transport; similar to mammalian bile transporters	51	57	51	7.4985	8.09675	8.46293	9.82491	7.78275	11.412	9.34461	8.7052	9.27727	10.5365	104574	7.43026	8.05829	8.51636	9.36885	7.75501	11.579	9.27054	9.01859	9.30486	10.5844	136017	7.5702	8.16621	8.65822	9.63864	7.81762	11.1981	9.31275	8.63761	9.30649	10.5978	136179
YHR108W	GGA2	Protein that interacts with and regulates Arf1p and Arf2p in a GTP-dependent manner to facilitate traffic through the late Golgi; binds phosphatidylinositol 4-phosphate, which plays a role in TGN localization; has homology to gamma-adaptin	18	17	18	8.89831	6.50541	9.9609	10.0115	8.51982	9.43708	9.64656	9.35282	9.14857	9.43523	46454	9.26571	6.48179	9.9428	10.0838	8.45198	9.25839	9.42697	9.30394	9.1342	9.55271	40362.2	9.22545	6.64731	10.482	9.80122	8.4566	9.23441	9.53004	9.11466	9.04126	9.36879	50433.2
YDR358W	GGA1	Golgi-localized protein with homology to gamma-adaptin, interacts with and regulates Arf1p and Arf2p in a GTP-dependent manner in order to facilitate traffic through the late Golgi	17	11	13	6.81507	8.89361	11.7088	11.2832	9.46268	6.67273	9.84935	8.77883	9.16224	8.24386	25284.9	6.93925	9.07486	12.5441	11.5341	9.45482	6.04772	9.41991	8.83272	9.16269	7.86787	14145.4	6.78054	8.60944	12.1029	11.8626	9.3779	6.52256	9.40037	8.63002	9.57083	8.01959	29459.1
YLL007C	YLL007C	Putative protein of unknown function; green fluorescent protein (GFP)-fusion protein localizes to the cytoplasm; YLL007C is not an essential gene	12	9	10	7.3312	9.76811	8.28744	9.39057	9.57416	10.2711	9.04448	8.84031	9.12307	9.28899	9866.75	7.31772	10.2147	8.12359	8.70678	9.84591	9.83828	9.55983	9.15453	9.36556	8.76662	10313	7.83396	11.7901	8.72412	9.36073	8.61734	10.0663	8.18872	8.91465	9.10948	8.30488	8700.44
YGL099W	LSG1	Putative GTPase involved in 60S ribosomal subunit biogenesis; required for the release of Nmd3p from 60S subunits in the cytoplasm	35	36	39	9.72964	6.96016	7.77204	9.17137	8.72859	11.8539	8.44935	8.64961	8.8772	10.7587	79583	9.98864	6.82563	7.7677	9.08087	8.63877	11.9522	8.70948	8.6533	8.8932	10.3887	87653.2	9.862	6.94344	7.82743	8.88697	8.82029	11.5042	8.52988	8.68811	8.80771	11.0423	93733.4
YDR399W	HPT1	Dimeric hypoxanthine-guanine phosphoribosyltransferase, catalyzes the formation of both inosine monophosphate and guanosine monophosphate; mutations in the human homolog HPRT1 can cause Lesch-Nyhan syndrome and Kelley-Seegmiller syndrome	26	35	30	11.3538	12.0877	7.48082	7.17309	9.57499	9.3179	8.14765	10.8267	7.90191	7.02906	69622.7	10.4006	12.5206	7.2648	7.26966	10.5296	9.4356	8.50953	10.6805	7.39139	6.92138	97145.5	11.7749	11.6545	6.86142	6.96562	10.0052	9.34044	9.1424	10.1387	8.56598	6.49054	88850.1
YNR060W	FRE4	Ferric reductase, reduces a specific subset of siderophore-bound iron prior to uptake by transporters; expression induced by low iron levels	0	1	0	0	0	0	0	0	0	0	0	0	0	0	0	0	0	0	0	0	0	0	0	0	1013.11	9.86324	6.62881	8.72784	9.28207	10.7034	11.8851	7.95444	9.32532	6.75678	9.79904	0
YNL096C	RPS7B	Protein component of the small (40S) ribosomal subunit, nearly identical to Rps7Ap; interacts with Kti11p; deletion causes hypersensitivity to zymocin; has similarity to rat S7 and Xenopus S8 ribosomal proteins	16	15	17	10.7934	9.50541	9.52132	8.39154	8.91392	6.47385	9.15163	9.60828	10.0475	8.4828	33301.6	11.2035	9.31794	9.75056	9.47594	8.87607	6.40686	8.61447	9.41742	9.56265	8.3108	44504.5	10.6497	8.6356	9.91207	10.5119	8.53764	6.155	8.924	9.44889	9.36561	8.73669	46572.1
YOR096W	RPS7A	Protein component of the small (40S) ribosomal subunit, nearly identical to Rps7Bp; interacts with Kti11p; deletion causes hypersensitivity to zymocin; has similarity to rat S7 and Xenopus S8 ribosomal proteins	15	14	16	11.1272	10.8388	8.56493	8.35703	8.76438	8.24057	7.83038	9.74973	8.70167	8.72414	36253.9	10.6254	10.67	8.59449	8.47794	8.52596	9.14567	7.92949	9.37465	8.46755	9.114	40139.2	10.9449	10.4764	8.71299	8.16123	8.82761	7.9873	8.53664	9.42563	9.09353	8.74516	54984.1
YKL179C	COY1	Golgi membrane protein with similarity to mammalian CASP; genetic interactions with GOS1 (encoding a Golgi snare protein) suggest a role in Golgi function	25	23	32	8.87115	8.47397	8.95064	9.77019	8.78248	8.58902	9.59709	9.12245	9.29568	9.45451	46956.8	8.61688	8.41652	9.41909	10.0714	8.62272	8.97768	9.09092	8.92432	9.09725	9.66267	32002.6	8.2237	8.58252	9.18125	10.3558	8.38876	9.26908	8.69992	9.1299	9.05133	10.0091	57770.7
YPL160W	CDC60	Cytosolic leucyl tRNA synthetase, ligates leucine to the appropriate tRNA	97	103	108	9.98064	5.53481	9.91201	9.50363	8.75075	8.19023	10.0667	9.77792	9.73044	9.46595	229797	10.1719	5.60461	9.86409	9.24165	8.95333	8.10626	9.89571	9.98913	9.7127	9.39168	235528	9.98508	5.59379	10.0669	9.45319	8.81614	8.10844	9.72225	9.86634	9.77029	9.51914	275466
YFR030W	MET10	Subunit alpha of assimilatory sulfite reductase, which converts sulfite into sulfide	15	25	29	6.79478	4.84479	5.47997	6.17982	6.95909	4.00088	6.38701	36.6895	6.53011	7.04897	22993	6.94035	4.62903	5.31672	6.21234	7.1914	4.20454	5.9749	36.2478	6.95159	7.36305	63832.7	6.97659	4.92857	5.87906	6.36271	7.38239	4.34711	6.22566	34.9786	6.77608	7.13595	71088.1
YDL004W	ATP16	Delta subunit of the central stalk of mitochondrial F1F0 ATP synthase, which is a large, evolutionarily conserved enzyme complex required for ATP synthesis; phosphorylated	1	0	1	8.56671	14.8413	7.66768	10.4807	6.83509	7.80699	9.81777	10.3284	8.69918	5.81204	1336.25	11.848	1.0525	12.611	21.5457	8.50309	2.79479	6.91751	5.07718	9.11928	11.3592	0	0	0	0	0	0	0	0	0	0	0	898.331
YDR248C	YDR248C	Putative protein of unknown function; sequence similarity to bacterial and human gluconokinase; green fluorescent protein (GFP)-fusion protein localizes to the cytoplasm; upregulated by deletion of the RNAP-II associated factor, PAF1	3	10	9	7.48743	9.04338	10.5359	10.9124	10.6206	6.95638	10.0679	8.33196	8.84463	8.06927	5810.17	8.1262	8.96439	11.0549	10.1767	11.6203	6.82902	9.73874	8.23249	8.81206	7.33429	20834.6	7.97558	9.23077	10.6	10.7734	10.4441	7.01578	9.47385	8.75281	8.82871	7.79749	29690
YOL031C	SIL1	Nucleotide exchange factor for the endoplasmic reticulum (ER) lumenal Hsp70 chaperone Kar2p, required for protein translocation into the ER; homolog of Yarrowia lipolytica SLS1; GrpE-like protein	13	12	13	8.7351	11.8392	8.73497	8.95694	8.625	7.94132	10.7723	8.03244	8.62044	8.6243	20615.7	8.5948	12.4697	8.70118	8.83246	8.67409	8.27135	9.52824	8.03841	9.50667	8.2941	22328.7	8.71743	12.5201	9.16845	9.23194	8.32087	8.3253	9.65199	8.07046	8.14982	8.74262	36599.1
YHR149C	SKG6	Integral membrane protein that localizes primarily to growing sites such as the bud tip or the cell periphery; potential Cdc28p substrate; Skg6p interacts with Zds1p and Zds2p	6	12	6	8.88405	12.0527	10.5563	8.43404	9.24825	10.2747	9.97539	5.42007	8.2339	7.80979	9979.6	8.19749	11.9694	9.66251	9.28162	8.81226	11.2641	7.96018	6.87336	7.93317	8.91419	13030.2	8.33095	11.959	10.8709	8.93054	9.19541	10.5895	8.76975	5.95181	8.04899	8.26957	11646.4
YGL197W	MDS3	Putative component of the TOR regulatory pathway; negative regulator of early meiotic gene expression; required, with Pmd1p, for growth under alkaline conditions; has an N-terminal kelch-like domain	10	9	10	8.12124	8.7013	9.21323	8.59826	8.98329	11.4746	9.17195	8.33592	8.60299	9.72973	16555.8	8.41001	8.46889	8.06049	9.76125	8.19329	10.7289	8.75291	8.40846	9.37321	10.7358	9766	7.81973	8.78024	8.26352	9.14837	8.34603	10.7761	9.19957	8.87414	9.06131	10.6399	6287.88
YKL191W	DPH2	Protein required, along with Dph1p, Kti11p, Jjj3p, and Dph5p, for synthesis of diphthamide, which is a modified histidine residue of translation elongation factor 2 (Eft1p or Eft2p); may act in a complex with Dph1p and Kti11p	11	10	13	7.55156	7.78621	7.83026	9.66641	10.8337	9.91573	8.363	10.3885	9.06536	9.5248	36453.9	8.58483	8.83497	7.83905	8.36485	8.64172	11.9493	9.06244	8.79746	9.00841	9.8118	33733.7	7.86682	8.47763	8.21626	7.90701	9.35557	11.5132	9.3848	8.47631	9.38512	10.348	28278.3
YMR217W	GUA1	GMP synthase; highly conserved enzyme that catalyzes the second step in the biosynthesis of GMP from inosine 5'-phosphate (IMP); transcription is not subject to regulation by guanine but is negatively regulated by nutrient starvation; reduction-of-function mutation gua1-G388D causes changes in cellular guanine nucleotide pools, defects in general protein synthesis, and impaired translation of GCN…	74	82	76	9.78537	10.5226	8.39341	8.11368	8.70891	10.6282	8.95335	8.4561	8.66852	8.68646	192720	9.63144	10.5214	8.4026	8.15215	8.63671	11.0471	8.92437	8.3332	8.61339	8.63972	233941	9.88627	10.1911	8.25103	8.21119	8.86397	10.8867	9.10419	8.43	8.46883	8.63015	213048
YOR327C	SNC2	Vesicle membrane receptor protein (v-SNARE) involved in the fusion between Golgi-derived secretory vesicles with the plasma membrane; member of the synaptobrevin/VAMP family of R-type v-SNARE proteins	4	3	4	7.80767	12.3464	10.7722	8.92312	8.24964	9.06751	9.6167	6.90707	8.85339	8.34491	12817.7	7.97078	11.963	10.9369	8.52582	8.35242	9.3679	9.32053	6.5233	9.41939	8.51371	13969.3	8.10533	12.1592	11.0468	8.297	8.74456	9.06431	9.73404	6.30116	9.23207	8.2315	19203.2
YAL030W	SNC1	Vesicle membrane receptor protein (v-SNARE) involved in the fusion between Golgi-derived secretory vesicles with the plasma membrane; proposed to be involved in endocytosis; member of the synaptobrevin/VAMP family of R-type v-SNARE proteins	1	2	1	7.50385	12.6343	10.2314	11.7552	9.25224	6.62859	9.9627	6.97563	8.67155	7.2312	1070.93	8.13706	12.3618	10.5536	10.6079	9.91582	7.28857	9.55746	5.78039	8.55307	8.12814	1769.86	6.67309	12.7425	9.40262	11.3151	8.57055	8.88459	9.28781	7.98823	8.29413	7.72526	510.015
YJL095W	BCK1	Mitogen-activated protein (MAP) kinase kinase kinase acting in the protein kinase C signaling pathway, which controls cell integrity; upon activation by Pkc1p phosphorylates downstream kinases Mkk1p and Mkk2p	9	10	11	8.42849	9.99479	8.31445	8.64526	9.80603	9.21049	9.12692	9.44662	8.807	9.12951	7635.54	8.83468	9.14019	8.57651	9.33131	8.44742	9.45796	9.26781	9.25615	9.3069	9.28677	16968.1	8.57264	10.1426	8.28796	8.68709	9.71505	9.89558	8.41098	9.12292	8.95666	9.12753	23676.9
YOR243C	PUS7	Pseudouridine synthase, catalyzes pseudouridylation at positions 35 and 56 in U2 snRNA, position 50 in 5S rRNA, position 13 in cytoplasmic tRNAs, and position 35 in pre-tRNA(Tyr); conserved in archaea, vertebrates, and some bacteria	39	37	29	10.4169	9.23592	7.85674	9.01343	8.98486	10.6424	8.88791	8.27326	8.71977	8.88712	84251.1	10.5463	9.14165	8.23633	8.99926	8.90309	10.4098	9.19963	8.45821	8.44436	8.56663	99267.9	10.4095	9.40503	7.82586	8.88395	9.34488	10.2086	9.31361	8.50683	8.44151	8.57329	81386.4
YGR229C	SMI1	Protein involved in the regulation of cell wall synthesis; proposed to be involved in coordinating cell cycle progression with cell wall integrity	16	15	12	9.65669	7.46276	9.07357	10.0924	8.52573	9.95522	8.26143	8.86037	8.69001	10.3465	31110.5	9.77505	8.02754	9.46476	9.82349	8.55337	9.17795	8.69267	9.04061	8.6655	9.68697	28877.7	9.96638	7.93909	8.86134	9.88717	8.51738	9.28222	8.94759	8.74669	8.84528	9.90047	27791.6
YMR120C	ADE17	Enzyme of 'de novo' purine biosynthesis containing both 5-aminoimidazole-4-carboxamide ribonucleotide transformylase and inosine monophosphate cyclohydrolase activities, isozyme of Ade16p; ade16 ade17 mutants require adenine and histidine	26	28	28	11.2741	7.06317	10.2211	11.4129	9.93663	5.97004	10.2306	10.1656	6.91925	7.65668	65606.8	11.6686	6.67179	10.1349	12.6809	9.44866	5.72711	9.70613	9.78865	7.36682	7.71591	73204.9	11.478	6.7232	10.2797	12.3891	9.53528	5.6951	9.8457	10.0123	7.17099	7.73351	71364.8
YLR028C	ADE16	Enzyme of 'de novo' purine biosynthesis containing both 5-aminoimidazole-4-carboxamide ribonucleotide transformylase and inosine monophosphate cyclohydrolase activities, isozyme of Ade17p; ade16 ade17 mutants require adenine and histidine	26	25	23	10.0027	5.77956	10.8216	10.3095	9.19591	7.27619	9.85951	9.31791	9.47095	8.8599	62168.3	10.2311	5.8723	11.0387	10.2536	8.81351	7.18995	9.56813	9.82625	9.24568	8.88168	64287.5	9.86147	6.15473	10.5719	10.3135	9.19373	7.4247	9.54039	9.78127	9.15846	8.89247	44622.2
YEL047C	YEL047C	Soluble fumarate reductase, required with isoenzyme Osm1p for anaerobic growth; may interact with ribosomes, based on co-purification experiments; authentic, non-tagged protein is detected in purified mitochondria in high-throughput studies	41	41	48	9.55761	11.2217	8.48387	8.59107	9.26598	10.0523	6.44045	9.02374	8.69174	9.59284	98039.5	9.72484	11.1056	8.26447	8.29205	9.5981	9.91425	6.67528	9.0399	9.22176	9.06684	105887	9.87151	11.3254	8.58833	8.13077	9.4677	9.78824	6.6284	8.99795	8.86738	9.25566	91249.9
YGL048C	RPT6	One of six ATPases of the 19S regulatory particle of the 26S proteasome involved in the degradation of ubiquitinated substrates; bound by ubiquitin-protein ligases Ubr1p and Ufd4p; localized mainly to the nucleus throughout the cell cycle	31	41	39	9.63627	8.69086	9.07368	9.57276	8.98546	9.11016	9.00281	9.26135	9.03877	8.53207	68729.4	9.47322	8.73862	10.3913	9.54735	8.79061	8.76587	8.54658	8.77107	9.45581	8.41802	86968.3	9.74282	8.83961	9.34096	9.45421	9.18937	8.90717	8.77446	8.90599	9.09114	8.65869	94485
YMR098C	ATP25	Mitochondrial protein required for the stability of Oli1p (Atp9p) mRNA and for the Oli1p ring formation; YMR098C is not an essential gene	3	2	4	8.53595	13.8794	7.39513	7.60216	8.7592	11.0697	8.32545	8.8975	8.35055	8.09673	5302	9.82656	12.4585	7.89901	7.9699	7.92346	10.456	8.2523	9.04061	8.48244	8.60372	4803.74	8.03225	15.4041	7.52181	7.64391	7.97243	11.538	8.29013	9.65921	7.07328	7.80102	3745.49
YBR055C	PRP6	Splicing factor, component of the U4/U6-U5 snRNP complex	4	6	7	5.86385	7.35313	6.77802	6.97874	8.34779	12.8403	7.83906	9.24967	11.2376	14.5275	2705.08	6.02592	6.8467	6.76214	7.24887	8.17196	13.2964	7.80956	8.83457	10.7558	15.162	10912	6.45183	6.74266	7.54633	7.07838	7.97614	11.5099	7.58341	9.86734	11.8606	14.3111	7417.78
YBR081C	SPT7	Subunit of the SAGA transcriptional regulatory complex, involved in proper assembly of the complex; also present as a C-terminally truncated form in the SLIK/SALSA transcriptional regulatory complex	9	7	11	6.58815	7.19822	8.04026	10.4842	8.53457	9.66059	8.55313	8.3103	10.5468	13.0387	13478.4	6.75883	6.8094	7.55197	8.87289	9.19088	10.4167	8.64523	8.27864	10.9612	13.4263	9157.64	6.12236	6.32001	8.28251	8.87353	8.68159	10.1952	8.58661	8.50288	11.3223	14.0156	17876
YDR411C	DFM1	Endoplasmic reticulum (ER) localized protein involved in ER-associated protein degradation (ERAD), ER stress and homeostasis; interacts with components of ERAD-L and ERAD-C and Cdc48p; derlin-like family member similar to Der1p	7	7	6	6.32045	12.3988	7.86228	10.1873	6.42039	12.3935	8.15384	7.81508	8.3211	11.0661	8770.98	6.17037	12.1155	8.24099	10.4254	6.03022	12.9149	8.04248	7.76638	8.27507	10.8694	3930.76	6.45559	12.1366	8.32628	8.94323	6.96924	11.428	9.1707	8.43691	8.58539	10.4578	9440.24
YJL186W	MNN5	Alpha-1,2-mannosyltransferase, responsible for addition of the second alpha-1,2-linked mannose of the branches on the mannan backbone of oligosaccharides, localizes to an early Golgi compartment	16	23	27	7.59178	8.83476	9.33562	8.42622	7.72617	10.6033	10.3496	8.35629	9.35025	10.3592	41520.3	7.18436	9.16385	8.44463	9.34057	7.14356	11.6136	9.45685	8.58661	8.62634	11.3324	45674	7.62166	9.16268	9.39005	9.09436	7.37463	10.5486	10.1685	8.67056	8.88897	9.98862	64107.1
YOR332W	VMA4	Subunit E of the eight-subunit V1 peripheral membrane domain of the vacuolar H+-ATPase (V-ATPase), an electrogenic proton pump found throughout the endomembrane system; required for the V1 domain to assemble onto the vacuolar membrane	46	39	37	10.4337	9.67026	9.85119	9.10783	8.21649	8.11691	9.53767	9.71404	8.72639	7.50957	85833.4	10.8625	9.55323	10.096	8.76721	8.42028	7.81829	9.04912	9.74379	9.22161	7.39356	87376.3	10.5778	9.22273	10.5873	8.99359	8.31904	7.86143	9.13447	9.46384	9.27036	7.47679	99268.9
YPR084W	YPR084W	Putative protein of unknown function	4	1	2	9.67964	9.06962	9.00126	9.3103	9.4641	9.5793	7.82893	8.50642	8.45156	10.0255	9026.12	10.4876	8.92249	9.28703	9.45064	9.64013	8.68509	8.09469	8.86217	8.31982	9.1633	763.069	7.85345	7.96159	8.55027	9.14255	9.45233	12.1634	7.38092	9.02832	8.56044	10.8278	7996.99
YOL070C	NBA1	Protein of unknown function, localizes to the bud neck and cytoplasm; interacts with Nap1p; may interact with ribosomes, based on co-purification experiments; potential Cdc28p substrate	12	17	15	10.1893	10.3708	9.10316	10.4048	8.74703	8.9304	7.71309	8.58456	8.60643	8.24246	29500.8	10.2035	10.1665	8.92766	10.4981	8.79543	9.08431	7.55311	9.06755	8.3588	8.23231	39148.9	9.48943	10.0616	9.27349	10.1164	9.17784	9.37966	7.4993	9.01704	8.28555	8.59926	24815.1
YKL152C	GPM1	Tetrameric phosphoglycerate mutase, mediates the conversion of 3-phosphoglycerate to 2-phosphoglycerate during glycolysis and the reverse reaction during gluconeogenesis	88	99	92	10.8916	7.45339	9.19135	8.99728	10.568	8.63225	8.26653	9.13332	8.96871	8.8043	226386	11.0455	7.61143	9.18936	8.48233	11.2111	8.54567	7.8551	9.29794	9.00407	8.67899	236044	11.3114	7.6527	9.47723	8.66599	10.8728	8.31003	8.25271	9.19061	8.89922	8.28526	255470
YGR054W	YGR054W	Eukaryotic initiation factor (eIF) 2A; associates specifically with both 40S subunits and 80 S ribosomes, and interacts genetically with both eIF5b and eIF4E; homologous to mammalian eIF2A	25	39	31	9.48281	8.12822	9.80124	10.2476	7.8025	9.78583	8.97149	8.35899	8.91305	9.42107	55885.5	9.02416	8.70623	9.48916	9.86502	7.81953	9.3874	9.15728	9.35254	8.94404	9.15496	84908.8	9.19304	8.73717	9.55222	9.92853	7.72539	9.678	9.06922	9.2655	8.72636	9.02279	88591.8
YJR134C	SGM1	Protein of unknown function, required for wild-type growth rate on galactose and mannose; localizes to COPI coated vesicles and the Golgi apparatus	13	14	17	10.2377	8.54556	8.71825	8.17379	11.0652	8.35826	8.64749	9.51895	8.71524	8.9242	23597.7	10.2339	7.8568	8.9838	8.71696	10.7894	8.43993	8.95312	9.3731	8.59944	8.97757	23730	9.76713	8.34296	9.3525	9.03602	10.7367	8.22382	8.51156	9.18391	8.62745	9.13056	38733
YOR112W	CEX1	Cytoplasmic component of the nuclear aminoacylation-dependent tRNA export pathway; interacts with nuclear pore component Nup116p; copurifies with tRNA export receptors Los1p and Msn5p, as well as eIF-1a and the RAN GTPase Gsp1p	16	19	22	8.05176	11.311	8.3723	9.29222	9.12943	8.54562	9.5873	8.94076	8.85822	8.80614	23340.1	8.28683	11.4427	8.61954	9.58925	9.04391	8.26532	9.21328	8.81762	8.87642	8.74899	38149.9	7.78204	10.6723	8.34686	9.97229	9.10638	8.60582	9.3737	8.8365	9.21188	8.98797	41900.4
YDL145C	COP1	Alpha subunit of COPI vesicle coatomer complex, which surrounds transport vesicles in the early secretory pathway	61	63	68	7.98265	4.7036	10.2544	11.0028	8.46181	8.91836	9.80358	9.18712	9.75887	10.8532	142121	8.03875	4.74328	10.8106	10.4784	8.71896	8.37325	10.5549	9.15666	9.83872	10.191	168543	8.34746	4.72649	10.319	10.138	8.89971	8.60566	10.7449	9.12477	9.90087	10.0891	159365
YFL013C	IES1	Subunit of the INO80 chromatin remodeling complex	9	12	12	7.4165	7.16304	8.18609	8.67034	7.72088	10.5958	8.89506	8.86989	10.6362	12.8149	12464.6	7.49298	7.4203	8.02644	8.96313	7.88152	10.9583	8.52206	8.8084	10.3792	12.4547	21139.8	7.41734	7.19897	8.65473	8.83744	7.59439	10.5398	8.51072	8.75747	10.6185	12.7738	21083.3
YLR330W	CHS5	Component of the exomer complex, which also contains Csh6p, Bch1p, Bch2p, and Bud7p and is involved in export of selected proteins, such as chitin synthase Chs3p, from the Golgi to the plasma membrane	21	27	19	9.91524	6.90233	10.0725	9.75085	9.33237	8.84744	9.73573	9.18885	8.57585	8.57844	25303.7	9.84307	7.14379	10.2293	9.82991	9.19551	8.92838	9.06896	9.26063	8.57035	8.83378	45010.9	10.1099	6.75467	10.5493	9.79716	9.25397	8.98657	9.24895	8.79264	8.79447	8.61619	25830
YKL178C	STE3	Receptor for a factor pheromone, couples to MAP kinase cascade to mediate pheromone response; transcribed in alpha cells and required for mating by alpha cells, ligand bound receptors endocytosed and recycled to the plasma membrane; GPCR	7	7	7	7.30098	10.7175	17.6564	7.71502	7.52324	9.05891	6.30744	7.43748	8.03953	9.14101	20053.3	7.81192	10.9478	17.5225	6.97079	7.46848	9.4212	6.87205	7.17441	7.65902	9.05066	22621.7	7.96465	11.1446	17	7.0417	7.49916	9.25017	6.80873	7.40783	7.95926	8.86635	24019.6
YOR008C	SLG1	Sensor-transducer of the stress-activated PKC1-MPK1 kinase pathway; involved in maintenance of cell wall integrity; required for mitophagy; involved in organization of the actin cytoskeleton; secretory pathway Wsc1p is required for the arrest of secretion response	5	4	3	9.59233	10.1269	13.6719	8.62294	8.06923	9.84207	8.99673	5.57591	7.70148	8.69169	6891.66	10.1178	10.3406	14.3599	8.93336	8.73647	9.3839	8.33719	5.36354	7.36189	7.95308	6693.37	9.57815	10.1198	14.4452	8.68502	8.32421	9.47994	8.63738	5.53993	7.39024	8.71524	7007.05
YBR289W	SNF5	Subunit of the SWI/SNF chromatin remodeling complex involved in transcriptional regulation; functions interdependently in transcriptional activation with Snf2p and Snf6p	7	4	8	8.64786	10.0944	7.65118	9.60754	9.07524	9.74732	9.27125	9.00429	8.72973	9.08055	6767.6	9.69873	10.5315	7.80727	8.62286	9.43497	10.243	8.8528	8.77242	8.42226	8.51797	3057.64	8.94658	9.80208	8.06513	9.36767	9.76708	9.55049	8.53152	8.8629	8.68059	9.33339	19124.2
YGL008C	PMA1	Plasma membrane H+-ATPase, pumps protons out of the cell; major regulator of cytoplasmic pH and plasma membrane potential; P2-type ATPase; Hsp30p plays a role in Pma1p regulation; interactions with Std1p appear to propagate [GAR+]	50	47	42	8.07851	9.09189	8.7747	8.70951	10.8493	10.1949	9.08346	9.34717	8.56139	8.21962	44417.2	8.4911	8.5519	9.71121	9.18241	10.4022	9.94164	9.10078	8.36743	8.96908	8.16459	53180.1	8.65648	8.73164	9.61462	8.62057	10.7719	9.91067	9.28311	8.42209	8.74828	8.16893	44827
YGL172W	NUP49	Subunit of the Nsp1p-Nup57p-Nup49p-Nic96p subcomplex of the nuclear pore complex (NPC), required for nuclear export of ribosomes	12	11	9	9.05905	8.58258	9.02024	8.94606	8.78123	8.64478	9.41762	8.84999	9.36221	10.2529	30011.9	9.474	8.62519	9.17115	8.61819	8.91001	8.62486	9.06389	8.66979	9.53844	10.234	38887.3	9.04482	8.39048	9.23122	8.57974	9.09261	8.57577	9.28262	8.46222	10.07	10.1784	43127.9
YEL022W	GEA2	Guanine nucleotide exchange factor for ADP ribosylation factors (ARFs), involved in vesicular transport between the Golgi and ER, Golgi organization, and actin cytoskeleton organization; similar to but not functionally redundant with Gea1p	35	32	31	7.6943	6.17747	9.26101	9.68724	9.1263	10.2809	9.31821	9.24501	9.63473	10.5132	58816.9	7.71693	5.29572	9.83049	9.5847	8.80498	9.73984	10.3011	9.20255	9.79008	10.6374	60955.3	8.02063	5.60961	9.56843	9.40954	9.28142	9.79073	10.3416	9.23532	9.60889	10.0449	64384
YJR031C	GEA1	Guanine nucleotide exchange factor for ADP ribosylation factors (ARFs), involved in vesicular transport between the Golgi and ER, Golgi organization, and actin cytoskeleton organization; similar to but not functionally redundant with Gea2p	12	9	16	6.77137	7.3277	9.09313	9.24512	8.99226	10.339	9.02278	8.89347	9.49643	11.7657	23488.3	7.0338	6.75421	8.50651	8.50598	8.47957	9.78387	9.84774	8.80325	12.549	10.6436	15121.5	6.64829	6.83082	7.72279	7.63425	7.89311	8.50105	8.53172	8.11181	20.0469	8.98823	32708
YHR107C	CDC12	Component of the septin ring of the mother-bud neck that is required for cytokinesis; septins recruit proteins to the neck and can act as a barrier to diffusion at the membrane, and they comprise the 10nm filaments seen with EM	25	28	21	8.6957	9.9201	8.78871	9.57255	8.39215	10.46	8.15558	8.33177	9.09266	9.51255	45319.6	9.32714	9.70473	9.40054	9.24708	8.21047	10.1149	8.31945	8.54876	9.14061	8.87991	57117.7	8.36375	10.4666	10.9084	9.13922	8.3739	9.39081	7.90221	8.82469	9.22157	8.32155	53951.1
YKR069W	MET1	S-adenosyl-L-methionine uroporphyrinogen III transmethylase, involved in the biosynthesis of siroheme, a prosthetic group used by sulfite reductase; required for sulfate assimilation and methionine biosynthesis	0	2	1	0	0	0	0	0	0	0	0	0	0	0	8.68797	8.96648	5.23542	5.55852	7.91008	4.83022	6.73426	30.5903	5.22228	7.30028	2630.99	7.98836	8.34325	5.37497	6.66599	6.25669	5.05559	5.64618	32.0827	6.57454	6.98756	677.209
YDR050C	TPI1	Triose phosphate isomerase, abundant glycolytic enzyme; mRNA half-life is regulated by iron availability; transcription is controlled by activators Reb1p, Gcr1p, and Rap1p through binding sites in the 5' non-coding region	95	125	98	10.7262	7.78783	8.78079	9.31622	10.445	8.91372	8.4469	9.99668	8.27695	8.20958	222706	10.6993	7.95754	8.73404	9.09724	10.7356	8.93945	8.98319	9.39533	8.33913	8.03054	282144	11.043	7.92093	8.5992	8.59668	10.8626	8.8491	9.19494	9.54142	8.5006	7.81395	252025
YMR189W	GCV2	P subunit of the mitochondrial glycine decarboxylase complex, required for the catabolism of glycine to 5,10-methylene-THF; expression is regulated by levels of 5,10-methylene-THF in the cytoplasm	22	28	24	8.73216	7.42013	12.1461	11.3442	12.5538	10.1528	8.39861	5.9238	7.21467	6.99013	50597.9	8.87829	7.3164	12.2115	11.6297	12.701	10.0633	8.42364	5.7237	7.03818	6.84058	63286.6	8.74169	7.36481	11.9586	11.2204	12.309	10.5875	8.24251	6.09081	7.14909	7.24443	43148.4
YJL167W	ERG20	Farnesyl pyrophosphate synthetase, has both dimethylallyltranstransferase and geranyltranstransferase activities; catalyzes the formation of C15 farnesyl pyrophosphate units for isoprenoid and sterol biosynthesis	23	32	29	7.76007	12.532	8.26973	8.63682	9.21989	8.07296	10.3618	11.1526	8.49538	6.37085	69813.5	8.11094	11.5568	9.1757	8.75449	8.87005	8.39245	10.9565	8.97435	8.7774	7.34054	92966.3	8.33633	11.5629	8.68338	8.67149	8.87521	8.43903	11.26	9.27805	9.0242	6.78611	102389
YML080W	DUS1	Dihydrouridine synthase, member of a widespread family of conserved proteins including Smm1p, Dus3p, and Dus4p; modifies pre-tRNA(Phe) at U17	8	10	10	9.89456	12.3361	7.2106	7.81818	9.56888	10.9973	8.13241	8.48698	8.38076	8.08726	12627.2	9.20373	11.9761	6.65217	8.26037	9.39889	11.8845	7.42582	8.45926	8.61381	9.01198	16385.5	9.40557	12.0508	7.25002	7.94709	9.4511	11.2909	8.00803	8.5438	8.66298	8.31941	19484.8
YLR150W	STM1	Protein required for optimal translation under nutrient stress; perturbs association of Yef3p with ribosomes; involved in TOR signaling; binds G4 quadruplex and purine motif triplex nucleic acid; helps maintain telomere structure	60	67	69	10.6784	10.0412	8.92104	8.01634	9.1191	8.08014	9.03506	9.04005	9.16803	8.80072	193464	10.6257	10.0937	8.92945	8.57459	9.24936	8.1245	8.42075	9.22787	9.00838	8.67504	165865	10.3797	9.81796	9.27866	8.86332	8.92566	7.96976	8.36621	9.06818	9.36937	8.86527	185859
YMR027W	YMR027W	Putative protein of unknown function; green fluorescent protein (GFP)-fusion protein localizes to the nucleus and cytoplasm; YMR027W is not an essential gene	25	30	22	8.40846	5.2284	10.3961	10.3041	9.39393	7.49706	10.4415	9.92145	9.73055	9.58356	49681.7	8.52271	5.1119	10.33	10.6339	9.49178	7.51688	10.5242	9.62047	9.95893	9.19545	61364.8	8.39536	5.16849	10.4383	10.3421	9.47886	7.64411	10.6493	9.26804	9.80952	9.69874	47771.9
YMR080C	NAM7	ATP-dependent RNA helicase of the SFI superfamily involved in nonsense mediated mRNA decay; required for efficient translation termination at nonsense codons and targeting of NMD substrates to P-bodies; involved in telomere maintenance	22	29	27	7.97688	7.82194	8.46367	9.31849	8.33619	10.4935	9.75299	9.21301	9.78747	9.76917	33972.3	7.89284	7.91757	8.44447	9.26711	8.46182	10.8588	9.53231	9.25762	9.38538	9.8744	42714.7	7.72497	9.27503	8.63016	8.8507	8.23703	10.5815	9.68008	9.69024	8.52496	9.72267	45323.5
YJL126W	NIT2	Nit protein, one of two proteins in S. cerevisiae with similarity to the Nit domain of NitFhit from fly and worm and to the mouse and human Nit protein which interacts with the Fhit tumor suppressor; nitrilase superfamily member	4	6	7	8.6255	11.8127	6.60218	9.69797	9.6938	10.1878	10.3087	8.07106	8.36977	7.52243	5490.41	8.96912	11.7539	7.35358	9.81519	9.16265	10.0139	8.88918	8.00924	8.44637	8.4723	7761.97	8.19723	12.6392	7.68594	9.92782	9.11484	10.1368	8.99471	8.34287	7.82587	8.03767	11634.5
YBR023C	CHS3	Chitin synthase III, catalyzes the transfer of N-acetylglucosamine (GlcNAc) to chitin; required for synthesis of the majority of cell wall chitin, the chitin ring during bud emergence, and spore wall chitosan	15	20	28	7.8085	9.04415	12.3461	9.33217	7.68219	8.8644	9.74153	6.8708	8.99031	10.2259	25657.1	7.73366	9.33882	11.9873	9.46386	7.34584	9.1186	9.30004	7.39766	8.9151	10.2997	30545.1	7.47318	9.683	11.9784	9.6719	7.50411	9.26828	9.20755	7.27841	8.66619	10.1664	43984.9
YGR124W	ASN2	Asparagine synthetase, isozyme of Asn1p; catalyzes the synthesis of L-asparagine from L-aspartate in the asparagine biosynthetic pathway	33	37	36	9.87382	6.59439	9.17969	9.73354	8.77	9.04136	10.4751	9.0463	9.36178	8.83263	79833.5	10.2591	6.56835	9.40019	9.76483	8.47941	8.78927	10.5093	9.0819	9.30503	8.75944	80481	9.91072	6.6469	9.24108	9.75127	8.47745	9.34966	10.2573	9.10378	9.07861	9.0832	96376.5
YPR145W	ASN1	Asparagine synthetase, isozyme of Asn2p; catalyzes the synthesis of L-asparagine from L-aspartate in the asparagine biosynthetic pathway	40	48	38	11.6682	6.02471	6.07917	7.73159	9.62622	11.3482	8.15295	12.1157	9.06951	9.13427	102303	12.2012	5.95765	6.46038	7.57453	9.77006	10.8779	7.65438	12.4036	9.16205	8.87272	140389	11.7788	5.90711	6.47463	7.64797	9.64392	10.6854	7.98705	12.1305	9.42831	9.25141	137631
YBR072W	HSP26	Small heat shock protein (sHSP) with chaperone activity; forms hollow, sphere-shaped oligomers that suppress unfolded proteins aggregation; oligomer activation requires heat-induced conformational change; also has mRNA binding activity	9	11	10	4.8024	5.3199	16.4197	12.3282	16.0898	2.20333	8.59491	8.3669	11.1158	5.5829	32473.9	5.03492	5.96079	15.8079	12.4416	15.1535	4.27786	7.49168	8.26762	10.3386	6.04977	35979.7	4.89052	5.3663	16.2297	13.7058	15.1091	2.25283	7.51705	8.75785	10.7957	6.25032	38947.7
YFR052W	RPN12	Subunit of the 19S regulatory particle of the 26S proteasome lid; synthetically lethal with RPT1, which is an ATPase component of the 19S regulatory particle; physically interacts with Nob1p and Rpn3p	17	18	16	9.36837	9.27122	9.75062	8.64029	8.99108	8.3157	8.90717	9.46284	8.98547	9.21132	59647.8	9.25447	9.33959	9.49445	8.56777	9.43296	8.63868	8.44871	9.54929	8.8315	9.36272	61059.7	9.74904	9.12646	9.42438	8.91384	9.06776	8.16405	8.48506	9.54635	9.14477	9.28535	53391.5
YLR151C	PCD1	Peroxisomal nudix pyrophosphatase with specificity for coenzyme A and CoA derivatives, may function to remove potentially toxic oxidized CoA disulfide from peroxisomes to maintain the capacity for beta-oxidation of fatty acids	1	0	0	6.83917	10.26	8.80871	9.94305	9.79202	7.39119	9.6989	9.43259	9.27327	9.45401	897.564	0	0	0	0	0	0	0	0	0	0	0	0	0	0	0	0	0	0	0	0	0	0
YGR184C	UBR1	E3 ubiquitin ligase (N-recognin), forms heterodimer with Rad6p to ubiquitinate substrates in the N-end rule pathway; regulates peptide transport via Cup9p ubiquitination; mutation in human UBR1 causes Johansson-Blizzard Syndrome (JBS)	13	15	19	6.9723	6.79376	9.69198	9.54229	9.83635	7.77421	10.4619	8.93848	9.98476	10.9219	24662.7	7.33681	6.94013	9.87823	9.78212	9.56945	7.47647	10.2005	8.97187	9.9603	10.803	33005.9	7.04033	6.83954	10.4835	9.68644	9.44318	7.49162	10.3582	8.91845	9.92625	10.7103	46519.2
YDR409W	SIZ1	SUMO/Smt3 ligase that promotes the attachment of sumo (Smt3p; small ubiquitin-related modifier) to proteins; binds Ubc9p and may bind septins; specifically required for sumoylation of septins in vivo; localized to the septin ring	1	2	2	8.09925	8.19431	8.91223	8.53269	8.52128	9.22167	9.81889	8.60221	10.0459	10.985	1007.3	7.79613	9.84361	8.43869	9.77531	8.7171	9.14865	9.44015	9.27899	9.34188	9.11454	1450.05	8.73999	9.41429	9.93423	9.85258	9.22736	8.39946	8.1772	9.0352	9.01809	9.10094	2537.46
YGL011C	SCL1	Alpha 1 subunit of the 20S proteasome involved in the degradation of ubiquitinated substrates; 20S proteasome is the core complex of the 26S proteasome; essential for growth; detected in the mitochondria	24	24	23	9.76733	11.9554	9.44064	8.71692	8.59551	8.48493	9.02378	8.79839	8.39946	7.70033	52040	9.72571	11.7924	9.24756	8.82645	8.6783	8.29304	8.9143	8.61096	8.76489	8.06197	68485	9.51096	11.9371	9.4736	9.01306	8.3942	8.38481	8.85813	8.66884	8.71988	7.94444	69602.9
YOR027W	STI1	Hsp90 cochaperone, interacts with the Ssa group of the cytosolic Hsp70 chaperones and activates Ssa1p ATPase activity; interacts with Hsp90 chaperones and inhibits their ATPase activity; homolog of mammalian Hop	74	74	62	11.5208	7.72729	10.1632	11.2881	9.26103	6.81856	9.54431	7.85144	8.41544	8.27841	160858	11.6003	7.59317	10.4411	11.6243	9.47749	6.7357	9.18357	7.50296	8.45681	8.2907	161804	11.2473	7.7673	10.3036	11.7306	9.21447	6.92066	8.96112	7.85497	8.37753	8.48834	151338
YPL169C	MEX67	Poly(A)RNA binding protein involved in nuclear mRNA export, component of the nuclear pore; ortholog of human TAP	19	20	28	9.36545	8.68245	7.70542	10.3394	7.3729	11.4496	7.85139	8.58529	9.01358	10.5748	25002.4	9.96321	8.92137	8.58467	10.4399	7.80462	10.2305	6.89377	8.60892	8.9687	10.4748	23132.2	9.49203	9.23598	8.31446	9.59657	8.14423	10.4468	8.69059	8.83284	9.37649	8.77292	63635.5
sp|P04264|K2C1_HUMAN_contaminant	KRT1	Keratin, type II cytoskeletal 1	13	11	13	15.9167	10.9603	8.78666	9.82901	6.18077	11.4561	4.06689	6.4122	8.52975	8.78257	17737.7	16.82	10.1619	9.28692	9.62192	5.97609	11.4945	3.82768	6.23062	8.82106	8.66343	22248.1	16.0513	10.6049	8.8475	9.90189	5.86434	11.3449	4.28767	6.4616	8.62685	8.88582	28180.1
sp|P35908|K22E_HUMAN_contaminant	KRT2	Keratin, type II cytoskeletal 2 epidermal	4	8	7	14.1841	8.67062	8.27725	13.2524	7.80671	10.2059	5.28728	6.77464	8.51042	7.92572	5275.11	16.2361	8.98158	7.11777	14.9412	6.90988	9.88705	4.74295	6.32753	8.04343	7.66207	19597.9	14.0794	10.4367	7.33068	13.711	6.60212	10.5728	5.14515	7.48133	7.28228	8.19532	12468.6
YHR039C-A	VMA10	Subunit G of the eight-subunit V1 peripheral membrane domain of the vacuolar H+-ATPase (V-ATPase), an electrogenic proton pump found throughout the endomembrane system; involved in vacuolar acidification	20	12	16	10.2013	10.0292	7.96504	9.90441	7.86269	9.77557	8.50863	8.76929	9.7436	8.14936	41995.3	9.67732	10.1084	8.2341	10.7113	7.83893	9.9344	7.35734	8.73901	9.5882	8.68715	43081.4	9.82027	8.86219	8.46706	11.9796	7.06001	10.0875	6.93144	7.49527	10.5092	9.64829	28664.1
YLR438W	CAR2	L-ornithine transaminase (OTAse), catalyzes the second step of arginine degradation, expression is dually-regulated by allophanate induction and a specific arginine induction process; not nitrogen catabolite repression sensitive	34	29	26	9.11168	10.9941	16.0187	6.50221	9.26745	5.69258	7.1994	10.1657	9.38934	6.52396	91741.1	8.94483	11.3544	15.9912	6.41944	9.47239	5.6434	7.69668	9.97061	9.04287	6.40038	78900	8.95655	10.7914	16.5723	6.7817	9.15968	5.74482	7.45945	9.70809	9.63446	6.13757	94206.1
YKR018C	YKR018C	Putative protein of unknown function; green fluorescent protein (GFP)-fusion protein localizes to the cytoplasm and nucleus	23	27	20	7.79342	5.43631	10.7304	10.4345	9.36117	8.22947	9.91363	9.03251	10.0741	9.90908	31674.5	7.87544	4.58319	10.8328	10.3723	9.36061	8.09338	10.176	8.89763	10.2187	10.4951	46303.9	7.69456	6.1147	10.1004	10.0932	9.13007	8.36887	10.0314	9.49484	9.82745	10.0421	39426
YCR088W	ABP1	Actin-binding protein of the cortical actin cytoskeleton, important for activation of the Arp2/3 complex that plays a key role actin in cytoskeleton organization	43	43	47	9.88746	9.06943	11.6611	10.5269	9.16426	6.32066	8.86931	8.31909	8.97995	8.06914	125836	9.60927	8.82439	11.4317	10.9112	9.45509	6.52069	8.89224	8.35492	8.98367	7.91536	126497	9.35349	8.90828	10.9641	10.4696	9.46708	6.65616	9.39131	8.61079	9.11813	7.94907	117805
YLR335W	NUP2	Nucleoporin involved in nucleocytoplasmic transport, binds to either the nucleoplasmic or cytoplasmic faces of the nuclear pore complex depending on Ran-GTP levels; also has a role in chromatin organization	42	49	45	11.215	6.64767	9.56417	9.59575	9.84029	7.89441	9.23694	9.0094	8.98886	8.90588	69403.7	11.2226	6.55696	9.69906	10.014	9.81	7.70665	9.33407	9.06016	8.75957	8.75921	108842	11.0196	6.72337	9.75816	9.78831	9.67439	7.82974	9.10967	9.01021	8.9635	9.01941	89551.3
##YGL192W	####IME4	##Probable mRNA N6-adenosine methyltransferase required for entry into meiosis; transcribed in diploid cells; haploids repress IME4 transcription via production of antisense IME4 transcripts; antisense transcription is repressed in diploids	2	1	1	13.0962	10.8527	6.32767	9.28313	7.9829	6.8609	10.3958	10.6001	7.53792	7.93087	2769.08	13.2325	11.1986	5.15069	8.61915	7.45485	6.17794	12.1089	11.265	8.26426	7.52032	2488.62	13.1075	10.5774	5.09715	8.65293	7.33276	7.53996	12.9157	10.3396	8.22858	7.10255	2214.23
YLR454W	FMP27	Putative protein of unknown function; the authentic, non-tagged protein is detected in highly purified mitochondria in high-throughput studies	15	16	17	6.75741	7.48549	10.9322	10.2189	9.98534	8.75532	9.82733	8.52971	8.80974	9.60212	20430.1	6.76881	6.94979	10.8506	9.91815	9.89577	8.56631	10.1737	8.8409	9.32989	9.59723	21263.1	6.90642	7.30492	10.8748	9.55571	9.67122	8.90496	9.92598	8.73204	9.07171	9.96221	21877
YBR049C	REB1	RNA polymerase I enhancer binding protein; DNA binding protein which binds to genes transcribed by both RNA polymerase I and RNA polymerase II; required for termination of RNA polymerase I transcription	17	29	24	9.40946	8.34546	8.36328	8.35748	9.90583	11.0357	8.97343	9.517	8.47311	8.54268	27865.7	9.68712	8.6269	8.79048	8.68921	9.89148	10.5173	8.44978	9.26074	8.36024	8.62439	39321.5	9.62845	8.52717	8.74867	8.72526	9.86893	10.788	8.31497	9.32335	8.38424	8.61657	38546
YDR026C	YDR026C	Protein of unknown function that may interact with ribosomes, based on co-purification experiments; Myb-like DNA-binding protein that may bind to the Ter region of rDNA; interacts physically with Fob1p	2	2	2	8.22733	10.1808	8.97167	8.88442	8.33913	11.2178	7.43048	9.34653	8.97619	9.35717	1356.3	8.78672	10.4426	7.87403	9.56308	8.35189	10.1622	8.3731	8.92583	8.65205	9.76521	4297.99	9.08744	9.78662	7.67027	9.60585	8.98667	10.4256	8.50667	9.42183	8.58247	8.83404	2535.49
YJR052W	RAD7	Protein that recognizes and binds damaged DNA in an ATP-dependent manner (with Rad16p) during nucleotide excision repair; subunit of Nucleotide Excision Repair Factor 4 (NEF4) and the Elongin-Cullin-Socs (ECS) ligase complex	1	2	1	6.47889	6.80935	9.85291	8.60922	10.9312	9.77093	9.61996	8.15334	9.51046	11.2011	1001.4	7.50726	6.86723	9.13827	9.00809	10.8944	8.49644	10.1555	8.36181	9.47619	11.0131	3886.72	7.26017	6.80929	8.56674	9.39563	10.6539	9.25902	9.7152	8.51037	9.71266	11.025	5951.62
YKR025W	RPC37	RNA polymerase III subunit C37	17	18	13	10.4857	12.9797	7.67895	8.6921	8.35064	10.0051	8.46752	8.28704	7.95388	7.99426	37781.1	10.7358	12.4309	8.06176	8.43873	8.27672	9.69935	8.45492	8.01989	8.26451	8.53482	36416.7	10.0702	13.1328	7.6451	8.35458	8.27167	9.69643	8.26544	8.75234	8.00406	8.71935	30166.9
YNL175C	NOP13	Nucleolar protein found in preribosomal complexes; contains an RNA recognition motif (RRM)	22	23	23	9.68607	10.7801	7.44592	9.10344	8.17925	11.7373	8.81781	8.08815	8.395	8.68796	41167.2	9.19273	12.2218	6.79708	8.87575	7.54656	12.6364	7.73216	8.64127	7.80572	9.43304	53442.8	10.127	11.6598	7.39846	8.79138	7.64727	11.7414	8.42434	8.25556	8.15478	8.71227	62988.3
YPR160W	GPH1	Non-essential glycogen phosphorylase required for the mobilization of glycogen, activity is regulated by cyclic AMP-mediated phosphorylation, expression is regulated by stress-response elements and by the HOG MAP kinase pathway	19	28	28	3.08442	6.97851	11.5566	10.2206	11.7219	2.42084	10.1589	14.2887	13.9498	6.49057	37039.9	3.83327	7.29859	11.2852	10.2204	11.9101	2.67368	9.60614	13.6337	14.0604	6.37383	71553.9	3.55643	7.28089	11.9491	9.86969	11.6451	2.87835	9.86825	13.4246	14.0379	6.40249	71635.4
YML117W	NAB6	Putative RNA-binding protein that associates with mRNAs encoding cell wall proteins in high-throughput studies; deletion mutants display increased sensitivity to some cell wall disrupting agents; expression negatively regulated by cAMP	16	10	12	7.89133	10.1028	8.59569	9.94029	8.88133	9.51625	8.97418	9.3339	9.02924	8.64031	18964.7	8.41281	9.97528	9.21273	9.30827	8.92582	8.60551	9.1425	8.92462	9.29951	9.09911	20517.1	8.51759	10.2908	8.5967	9.58383	8.91723	8.79216	9.50038	9.18298	9.16139	8.35972	28312.2
YNL132W	KRE33	Essential protein, required for biogenesis of the small ribosomal subunit; heterozygous mutant shows haploinsufficiency in K1 killer toxin resistance	28	43	32	6.26282	5.74739	7.02177	7.6717	7.20028	13.5194	8.66334	7.53063	11.1772	16.2357	58715.6	6.08411	5.94456	6.5751	7.76065	7.07313	14.5561	8.42717	7.89328	10.709	15.8821	82388	5.95979	5.77115	6.45767	7.66281	6.91304	14.4185	8.42848	7.89334	11.0033	16.4102	71329.4
YGL206C	CHC1	Clathrin heavy chain, subunit of the major coat protein involved in intracellular protein transport and endocytosis; two heavy chains form the clathrin triskelion structural component; the light chain (CLC1) is thought to regulate function	76	81	82	7.05821	4.23061	12.3566	10.2867	9.06312	8.05063	10.1581	9.24391	10.5327	9.93734	162827	7.04223	4.12703	12.5947	10.2696	8.86273	7.85148	10.0104	9.37611	10.5087	10.2561	178374	7.09163	4.32725	12.5654	10.0818	9.03939	7.81459	10.2007	9.48375	10.4904	9.80695	239197
YMR090W	YMR090W	Putative protein of unknown function with similarity to DTDP-glucose 4,6-dehydratases; GFP-fusion protein localizes to the cytoplasm; up-regulated in response to the fungicide mancozeb; not essential for viability	7	5	8	5.91887	8.02162	12.7222	9.18742	12.1148	3.46954	8.99641	11.1275	12.0433	7.26694	11009.8	5.90508	8.60422	11.8597	9.79802	11.4659	3.56356	8.8232	12.1925	11.6335	7.06248	14682.2	6.60068	7.69014	12.5457	10.0453	10.3732	4.77162	8.77695	10.8951	11.6074	7.59579	13935.2
YGR232W	NAS6	Proteasome-interacting protein involved in the assembly of the base subcomplex of the 19S proteasomal regulatory particle (RP); ortholog of human oncoprotein gankyrin, which interacts with the Rb tumor suppressor and CDK4/6	6	7	6	9.19778	12.1384	8.96825	9.2938	9.73342	7.66312	9.7387	8.20736	8.33487	7.59392	19665.3	9.21961	12.7115	9.23672	9.62783	9.7307	7.65099	9.27082	7.89702	7.76958	7.79046	15720.4	8.86679	12.4137	9.12197	9.87379	9.76299	7.59565	9.09823	8.17553	8.24624	7.74139	16499.7
YPL208W	RKM1	SET-domain lysine-N-methyltransferase, catalyzes the formation of dimethyllysine residues on the large ribsomal subunit protein L23a (RPL23A and RPL23B)	14	10	13	8.24351	6.0589	8.77536	8.40823	9.4707	9.61587	9.64477	9.08472	9.81543	11.8305	23032.1	8.18967	6.21207	9.27302	8.87862	9.21666	9.65987	9.25075	9.07541	9.71981	11.4417	21700.9	7.81689	5.85601	8.74933	9.31293	9.01571	9.99453	9.27475	9.28932	9.87886	11.7175	41229.4
YJR092W	BUD4	Involved in bud-site selection and required for the axial budding pattern; localizes with septins to bud neck in mitosis and may constitute an axial landmark for next round of budding; required for the formation of a double septin ring, and generally for the organization of septin structures; potential Cdc28p substrate	18	16	17	9.01647	9.10771	8.32444	9.75094	9.34196	9.52149	9.51858	8.90172	8.52343	8.89797	16610.4	8.95207	9.49107	8.41616	10.1271	9.24957	9.63179	9.29772	8.80963	8.16295	8.7518	29264.3	8.91045	9.48662	8.39739	10.0829	9.32025	9.58151	9.09801	8.70448	8.49998	8.81764	25144.6
YAR002W	NUP60	Subunit of the nuclear pore complex (NPC), functions to anchor Nup2p to the NPC in a process controlled by the nucleoplasmic concentration of Gsp1p-GTP; involved in nuclear export and cytoplasmic localization of specific mRNAs such as ASH1	20	19	24	9.76131	7.6548	9.4664	8.9617	9.34457	8.98432	9.38896	8.99379	9.3657	8.98984	44084.1	10.0615	7.67211	9.37694	9.2635	9.10256	9.24002	8.70327	9.287	9.31724	8.8842	40533.3	9.60636	7.64976	9.27911	9.49606	8.86641	9.53606	8.57317	9.68824	8.9048	9.30677	45857
YOR056C	NOB1	Essential nuclear protein involved in proteasome maturation and synthesis of 40S ribosomal subunits; required for cleavage of the 20S pre-rRNA to generate the mature 18S rRNA	9	11	11	9.55435	10.4563	7.60654	8.93782	8.05262	12.6694	7.44236	8.37455	8.10248	9.74332	24318.6	9.61714	9.9038	7.22201	10.178	7.53649	13.1727	6.60426	7.5905	8.70555	10.3304	23419.2	9.31699	9.89053	7.24496	9.55192	7.84743	13.6165	6.42228	8.11527	8.39106	10.5118	43610.3
YNL313C	EMW1	Essential conserved protein with a role in maintaining cell wall integrity; contains six TPR (tetratricopeptide repeat) domains clustered in the C-terminal region; conditional mutant is suppressed by overexpression of GFA1	27	37	35	7.58627	8.87018	7.74568	9.3765	8.19558	10.9909	8.77129	8.88846	9.72157	10.7984	47043	7.47463	8.53023	7.81897	9.05674	8.17251	11.7748	8.91906	8.68569	9.45332	11.0032	81751.2	7.83364	8.4666	8.32101	9.05318	8.34332	11.1132	8.99849	8.73148	9.41948	10.6307	84998.3
YFR010W	UBP6	Ubiquitin-specific protease situated in the base subcomplex of the 26S proteasome, releases free ubiquitin from branched polyubiquitin chains; works in opposition to Hul5p polyubiquitin elongation activity; mutant has aneuploidy tolerance	30	29	26	10.2966	8.36448	10.3296	0.515935	10.1445	9.73137	10.8995	9.64198	10.8472	10.1913	45058.2	9.8034	9.01882	10.2175	0.400179	9.74979	11.9358	9.515	9.79012	9.79	10.7857	59496.5	10.1683	8.43024	10.576	1.92553	9.78541	9.50596	10.05	10.0728	10.2989	10.1871	46006.3
YLR364W	GRX8	Glutaredoxin that employs a dithiol mechanism of catalysis; monomeric; activity is low and null mutation does not affect sensitivity to oxidative stress; GFP-fusion protein localizes to the cytoplasm; expression strongly induced by arsenic	2	1	3	9.26127	7.89716	7.05559	10.4231	10.2284	7.33519	7.86189	12.4859	8.95622	9.3992	1838.82	8.94595	10.1666	8.07299	10.7736	10.271	7.43209	8.46359	11.9626	7.13991	7.67	2249.93	9.29947	7.90868	7.05289	11.102	10.6433	7.75686	6.92363	12.0443	8.6109	9.54622	9171.18
YKR023W	YKR023W	Putative protein of unknown function; the authentic, non-tagged protein is detected in highly purified mitochondria in high-throughput studies	10	16	14	9.56654	11.5525	9.29782	8.61958	9.99652	9.0079	8.99065	7.97524	8.34086	7.53748	16297.5	9.21294	11.7267	8.76923	8.68359	10.6739	9.02445	8.39377	8.39092	8.54324	7.4765	35843.6	8.93539	11.8973	8.85958	8.90926	9.94186	8.8706	8.35744	8.11951	9.23135	7.79056	23101.4
YJR137C	MET5	Sulfite reductase beta subunit, involved in amino acid biosynthesis, transcription repressed by methionine	36	43	42	7.46972	4.83306	5.80742	5.739	7.70349	3.86252	5.79688	36.7631	6.89115	6.04425	76425.9	7.42251	4.78023	5.6972	5.61903	7.8209	3.61504	5.63113	38.2545	6.59867	5.59687	93392.7	7.21579	4.71729	5.57255	5.66267	7.67604	3.46409	5.3911	39.1422	6.41977	5.75169	117392
YIL075C	RPN2	Subunit of the 26S proteasome, substrate of the N-acetyltransferase Nat1p	47	58	43	8.06885	6.80476	9.37864	9.46491	9.04675	9.13798	9.51993	9.22955	10.1265	10.1498	97224.6	8.06621	6.55808	9.45136	9.50295	8.82919	9.37146	9.48851	9.27554	9.96558	10.3966	135380	8.36118	6.93153	9.44604	9.42591	8.83593	9.05089	9.24329	9.25448	9.81356	10.5398	99931.4
YDR354W	TRP4	Anthranilate phosphoribosyl transferase of the tryptophan biosynthetic pathway, catalyzes the phosphoribosylation of anthranilate, subject to the general control system of amino acid biosynthesis	8	10	11	8.80787	10.2152	7.73781	8.11429	9.02902	10.3032	9.6941	9.16785	8.61433	9.23533	27233.9	8.84327	9.61504	8.54203	8.46242	9.4411	9.96139	9.43304	8.82215	8.93997	8.84564	19679.5	8.90795	10.1737	8.34153	8.6559	8.99459	11.086	8.30605	9.09038	8.38681	8.97947	39798.4
YKR092C	SRP40	Nucleolar, serine-rich protein with a role in preribosome assembly or transport; may function as a chaperone of small nucleolar ribonucleoprotein particles (snoRNPs); immunologically and structurally to rat Nopp140	7	10	9	10.1941	12.7416	6.97325	8.60612	7.75809	12.0251	7.14053	6.40158	9.01746	10.0787	25706.3	9.65974	14.1004	7.14027	9.09144	7.40506	11.6817	7.08833	7.06452	8.04841	9.60601	30476	9.37202	14.5622	7.07337	9.50246	7.04615	11.0669	6.65868	7.37147	8.14697	10.0908	26091.6
YPL106C	SSE1	ATPase that is a component of the heat shock protein Hsp90 chaperone complex; binds unfolded proteins; member of the heat shock protein 70 (HSP70) family; localized to the cytoplasm	70	98	98	10.3268	8.44535	9.24241	9.95993	9.1476	7.59478	10.6261	8.78358	8.47786	8.27544	161677	10.543	8.89317	9.37482	10.0854	9.21114	7.81632	10.0072	8.57609	8.3764	8.03107	203020	10.5083	8.73495	9.33411	10.0658	9.09069	7.7166	10.2058	8.61536	8.63949	7.98031	251923
YBR169C	SSE2	Member of the heat shock protein 70 (HSP70) family; may be involved in protein folding; localized to the cytoplasm; highly homologous to the heat shock protein Sse1p	15	19	19	8.14882	4.01848	11.5399	12.862	11.9651	3.84482	10.4887	9.41086	9.88945	8.69012	31000.5	8.44655	4.24411	11.7398	12.5589	12.2116	3.70461	9.89019	9.25636	10.3446	8.50321	42065	8.26688	3.63606	11.4033	13.2339	11.7582	3.40709	9.88709	9.30144	11.0801	8.87755	61192.5
YHL020C	OPI1	Transcriptional regulator of a variety of genes; phosphorylation by protein kinase A stimulates Opi1p function in negative regulation of phospholipid biosynthetic genes; involved in telomere maintenance	4	7	7	9.91286	9.7201	8.56991	9.36987	8.74716	9.40708	9.8698	8.0356	8.4211	8.84642	11418.8	9.31754	10.4462	8.77137	9.72649	8.16735	9.81391	9.61538	8.48242	8.25356	8.30045	10747.7	9.05638	10.7075	8.68139	10.2149	8.13231	9.68731	9.33288	8.02661	8.22389	8.82833	9291.12
YIL068C	SEC6	Essential 88kDa subunit of the exocyst complex, which mediates polarized targeting of secretory vesicles to active sites of exocytosis; dimeric form of Sec6p interacts with Sec9p in vitro and inhibits t-SNARE assembly	7	9	11	8.715	7.17332	9.00883	8.22238	10.1003	9.41735	9.38057	9.54615	9.53232	9.83185	8948.14	7.92776	7.14969	8.68599	8.67498	10.0474	9.89408	8.84751	9.94018	9.21739	10.5237	16974.9	8.03175	7.10904	8.83672	8.50228	9.82698	9.69197	8.97987	9.7113	9.62832	10.603	17392.4
YJL087C	TRL1	tRNA ligase, required for tRNA splicing and for both splicing and translation of HAC1 mRNA in the UPR; has phosphodiesterase, polynucleotide kinase, and ligase activities; localized at the inner nuclear envelope and partially to polysomes	27	36	34	8.0791	11.2122	7.88991	8.97521	9.49441	10.1209	8.38297	8.61422	8.80329	9.34356	49977.4	8.61681	11.1434	7.79029	8.60043	9.64972	9.84777	8.86596	8.75882	8.81937	8.80901	77487	8.4928	11.1387	8.0366	8.58655	9.6637	9.49371	8.90778	8.78614	8.96133	8.84982	58225.8
YHR099W	TRA1	Subunit of SAGA and NuA4 histone acetyltransferase complexes; interacts with acidic activators (e.g., Gal4p) which leads to transcription activation; similar to human TRRAP, which is a cofactor for c-Myc mediated oncogenic transformation	28	25	28	6.07094	6.91065	8.39225	7.86849	7.92397	9.75894	8.93771	8.07991	11.945	15.1018	48580.3	5.92151	6.94209	8.11467	8.18293	7.63615	10.0746	8.84143	8.17146	11.4823	15.5704	52805.3	6.11681	7.21299	8.39346	8.06349	7.57529	9.87376	8.97122	8.21733	11.3946	15.0835	45830.8
YKL139W	CTK1	Catalytic (alpha) subunit of C-terminal domain kinase I (CTDK-I); phosphorylates both RNA pol II subunit Rpo21p to affect transcription and pre-mRNA 3' end processing, and ribosomal protein Rps2p to increase translational fidelity; similar to the Drosophila dCDK12 and human CDK12 and probably CDK13	7	2	10	7.83663	9.8496	8.89233	10.2221	7.82622	10.1717	8.50848	9.00581	8.66935	9.93621	13787.7	7.61608	8.5185	8.21973	9.81457	8.63681	9.99634	8.61715	8.99231	9.58097	10.9021	4810.21	7.36644	8.91321	8.13039	9.70007	8.09654	10.4255	8.4404	8.40631	10.135	11.2822	15148.8
YBR196C	PGI1	Glycolytic enzyme phosphoglucose isomerase, catalyzes the interconversion of glucose-6-phosphate and fructose-6-phosphate; required for cell cycle progression and completion of the gluconeogenic events of sporulation	86	90	94	9.21048	6.91681	9.80543	11.2172	9.0224	8.26902	8.20366	8.17161	9.89548	10.2003	195227	9.34636	6.99295	10.0509	10.8821	9.0107	7.92271	8.35785	8.38073	9.98405	9.97046	205648	9.15046	6.7579	9.52782	12.254	8.60063	8.20419	8.04801	8.17652	9.73592	10.4044	217060
YDR228C	PCF11	mRNA 3' end processing factor, essential component of cleavage and polyadenylation factor IA (CF IA), involved in pre-mRNA 3' end processing and in transcription termination; binds C-terminal domain of largest subunit of RNA pol II (Rpo21p); required for gene looping	7	8	11	8.86044	12.5045	8.56803	8.59729	8.58216	9.1719	8.84507	9.04132	8.46149	8.26246	11314.6	7.46506	10.2268	7.66484	7.51336	7.79254	7.52727	7.86989	7.2305	20.686	6.91596	9147.41	8.54445	12.3466	7.92196	8.95448	9.00213	8.64754	9.75646	9.03012	8.67408	8.03079	15543
YNL271C	BNI1	Formin, nucleates the formation of linear actin filaments, involved in cell processes such as budding and mitotic spindle orientation which require the formation of polarized actin cables, functionally redundant with BNR1	39	40	43	8.54157	9.82153	8.99258	9.11644	9.18864	9.21538	8.8996	8.96274	9.15788	9.01234	57608.8	8.80793	9.73319	8.85657	9.30376	9.04471	9.45212	8.50233	9.00153	9.03096	9.16593	63244.7	8.57048	9.76072	8.67439	9.44368	9.14872	9.52024	8.6511	9.27623	9.03547	8.82706	76527.6
YFR016C	YFR016C	Putative protein of unknown function; green fluorescent protein (GFP)-fusion protein localizes to the cytoplasm and bud; interacts with Spa2p; YFL016C is not an essential gene	39	38	28	9.40534	7.46962	9.02608	9.94201	11.9183	7.01354	9.30984	9.34503	8.68983	8.76606	58669.9	9.91325	7.54252	9.20348	10.1396	12.7178	6.52214	9.01521	9.04155	8.60639	8.20921	64489.7	9.89387	7.59247	9.47294	10.1196	11.4287	7.01084	8.73847	8.961	8.83194	8.84712	53930.8
YMR240C	CUS1	Protein required for assembly of U2 snRNP into the spliceosome, forms a complex with Hsh49p and Hsh155p	8	10	8	9.12943	9.91988	7.77429	8.41282	10.0949	9.98191	9.8646	8.93821	8.08379	8.70714	16902.6	9.67546	9.88869	8.45999	8.37915	10.1738	9.22248	8.92033	8.96126	8.74321	8.48938	40622.7	9.24182	9.72959	8.02022	8.12329	10.2907	9.47489	9.11597	9.20009	8.80228	8.9267	19579.7
YOR142W	LSC1	Alpha subunit of succinyl-CoA ligase, which is a mitochondrial enzyme of the TCA cycle that catalyzes the nucleotide-dependent conversion of succinyl-CoA to succinate; phosphorylated	18	24	23	8.96	10.6646	9.05849	10.0568	8.81115	7.69931	9.70173	9.70312	8.35323	7.86747	42844.9	9.2562	10.1604	8.78741	9.8322	9.22713	7.63182	9.87169	9.59493	8.60861	7.94187	70041.3	9.13079	10.2908	9.52912	10.0245	8.85053	7.64513	9.59973	9.41098	8.3443	8.0691	83504.2
YDR120C	TRM1	tRNA methyltransferase; two forms of the protein are made by alternative translation starts; localizes to both the nucleus and mitochondrion to produce the modified base N2,N2-dimethylguanosine in tRNAs in both compartments	30	26	27	8.79726	7.99644	7.56023	8.76429	8.53966	11.362	8.68951	8.49798	9.55099	11.1948	48598.6	9.04037	8.35044	7.49699	8.84651	8.189	11.3928	8.54653	9.03909	8.9608	11.0445	54864.1	9.19549	8.29949	7.68282	8.92732	8.31887	10.863	8.55265	8.84746	9.13703	11.083	56037.5
YDR322W	MRPL35	Mitochondrial ribosomal protein of the large subunit	10	7	12	9.49036	12.5253	9.45467	9.07872	8.31665	8.91691	8.67703	8.68498	8.05836	7.67909	27213.8	9.74125	13.1618	8.22603	9.45196	8.38863	8.92519	8.57917	9.25248	7.80364	7.37017	15286.5	10.4044	13.891	7.95708	9.32174	7.95552	8.53222	8.99565	9.35245	7.62041	6.8701	26165
YER093C	TSC11	Subunit of TORC2 (Tor2p-Lst8p-Avo1-Avo2-Tsc11p-Bit61p), a membrane-associated complex that regulates actin cytoskeletal dynamics during polarized growth and cell wall integrity; involved in sphingolipid metabolism; contains a RasGEFN domain	3	7	7	7.8119	11.3829	7.98183	9.19443	9.21732	9.14784	8.88143	8.98569	9.07046	9.23306	3277.41	7.19649	11.8374	7.17575	8.13405	10.2354	9.55234	9.58495	8.39203	9.34201	9.4564	14953.9	7.47895	11.7882	8.26764	8.37364	9.8044	9.5002	9.02891	8.19716	8.84749	9.63196	14191.5
YOR144C	ELG1	Subunit of an alternative replication factor C complex important for DNA replication and genome integrity; suppresses spontaneous DNA damage; involved in homologous recombination-mediated repair and telomere homeostasis	1	1	1	7.16822	8.62328	7.34702	9.07376	9.58744	11.2532	7.89164	8.79716	9.34838	11.866	1143.77	7.43052	8.39228	5.53669	8.63898	10.5779	10.9273	6.86739	8.85653	11.405	12.265	245.707	11.2241	9.63332	7.69353	6.97127	8.02597	8.78523	9.09521	10.5065	10.6806	8.311	413.16
YAL032C	PRP45	Protein required for pre-mRNA splicing; associates with the spliceosome and interacts with splicing factors Prp22p and Prp46p; orthologous to human transcriptional coactivator SKIP and can activate transcription of a reporter gene	5	4	8	9.07611	9.88023	8.46109	9.62678	8.68285	9.95742	8.20226	9.25689	8.37113	9.39861	3820	10.2431	9.86666	7.8908	9.08769	9.59978	9.86871	7.26923	9.15336	8.7766	9.14658	7677.52	9.51323	9.50062	8.24405	9.2288	9.61956	9.63698	8.02662	8.80611	8.77103	9.56051	8318.13
YDR532C	KRE28	Subunit of a kinetochore-microtubule binding complex with Spc105p that bridges centromeric heterochromatin and kinetochore MAPs and motors, and is also required for sister chromatid bi-orientation and kinetochore binding of SAC components	1	2	2	7.62177	11.1572	9.22872	8.83869	9.93034	10.3452	8.7621	8.32217	8.7517	7.94662	1204.5	7.17401	8.8042	7.5003	9.19725	9.46257	11.3194	7.9617	9.2706	10.137	10.0484	2440.7	7.17865	8.45854	7.38353	8.92276	10.3321	11.0511	7.95897	9.02275	9.87715	10.7341	2113.24
YLL004W	ORC3	Subunit of the origin recognition complex, which directs DNA replication by binding to replication origins and is also involved in transcriptional silencing	3	4	5	6.2996	7.66358	7.82695	8.93899	8.10339	12.0925	9.18508	7.95128	10.203	12.7098	2234.29	5.42382	7.71397	6.88923	8.43116	8.2572	12.814	8.30001	7.68984	10.5474	14.83	6945.61	5.66913	7.33109	7.16185	9.06782	7.84803	12.2687	8.32202	8.30999	10.0817	14.8425	5288.02
YIL126W	STH1	ATPase component of the RSC chromatin remodeling complex; required for expression of early meiotic genes; essential helicase-related protein homologous to Snf2p	25	27	29	7.52038	6.4491	7.42249	8.18902	8.6477	10.6455	8.72449	9.12312	10.6925	13.5655	45408.1	7.3021	6.09062	7.44355	8.20183	8.27964	11.1564	8.63051	9.17216	10.8115	13.8366	65483.8	7.56984	6.48406	7.54515	8.28686	7.88901	10.9252	8.63659	8.9275	10.7205	13.923	73837
YOR290C	SNF2	Catalytic subunit of the SWI/SNF chromatin remodeling complex involved in transcriptional regulation; contains DNA-stimulated ATPase activity; functions interdependently in transcriptional activation with Snf5p and Snf6p	15	12	16	6.51312	8.61003	7.36854	9.29058	7.80187	10.8162	9.49425	8.25698	10.3492	12.4585	21511.3	6.72982	8.36209	7.25259	9.41886	7.78292	10.9045	9.52683	8.80888	10.2681	11.8439	24175.4	6.861	8.9159	7.13789	9.49457	8.0454	10.3747	9.70228	8.87544	9.94473	11.5458	26138.2
YMR192W	GYL1	Putative GTPase activating protein (GAP) with a role in exocytosis; stimulates Gyp5p GAP activity on Ypt1p, colocalizes with Gyp5p at sites of polarized growth; interacts with Gyp5p, Rvs161p, and Rvs167p; involved in recruiting Rvs167p to the bud tip during polarized growth	14	15	15	8.60386	8.51614	9.12061	9.98252	9.21078	9.29637	9.18489	8.50711	8.74005	9.74806	20368.5	8.48111	8.3437	8.44607	10.2486	9.45654	9.6882	8.34078	8.47218	8.92688	10.4869	28180.6	9.0257	9.43952	9.16728	9.99048	8.7886	8.98432	8.47298	9.10137	8.41521	9.51068	29831.2
YHR064C	SSZ1	Hsp70 protein that interacts with Zuo1p (a DnaJ homolog) to form a ribosome-associated complex that binds the ribosome via the Zuo1p subunit; also involved in pleiotropic drug resistance via sequential activation of PDR1 and PDR5; binds ATP	46	70	55	10.2187	10.3003	8.59674	10.0211	8.38357	9.58592	8.78962	8.46496	8.38481	8.14954	120093	9.95183	10.0586	8.46798	10.8642	8.08311	9.61395	8.18151	8.32642	8.64693	8.68822	188186	10.095	9.88436	8.42397	10.8181	8.0057	9.74232	8.35076	8.31176	8.73217	8.51907	173935
YDR365C	ESF1	Nucleolar protein involved in pre-rRNA processing; depletion causes severely decreased 18S rRNA levels	20	23	18	8.99582	5.99227	7.53256	9.76866	9.5876	14.1912	8.54531	7.97047	8.77048	9.60573	42638.9	9.1079	6.28964	7.46555	9.77042	10.0305	14.3526	8.78551	7.82192	8.49172	8.7276	44132.6	8.80217	6.05514	7.4571	9.7875	9.75715	14.8154	8.4493	7.80909	8.51448	9.47675	36844.9
YHR158C	KEL1	Protein required for proper cell fusion and cell morphology; functions in a complex with Kel2p to negatively regulate mitotic exit, interacts with Tem1p and Lte1p; localizes to regions of polarized growth; potential Cdc28p substrate	35	38	45	10.0704	8.90964	9.01983	9.68575	9.67961	7.7521	9.60984	8.91209	8.92413	8.32364	78870.4	9.69069	9.07595	8.42928	9.95422	9.53057	8.48254	9.03432	9.21446	8.81725	8.67652	73852.4	9.54033	9.19359	8.43186	10.3605	9.18609	8.54603	8.6168	9.32709	8.52734	9.16084	82988.1
YMR186W	HSC82	Cytoplasmic chaperone of the Hsp90 family, redundant in function and nearly identical with Hsp82p, and together they are essential; expressed constitutively at 10-fold higher basal levels than HSP82 and induced 2-3 fold by heat shock	22	26	27	9.82297	7.43359	10.0173	9.87661	10.1383	7.5238	10.0251	7.80145	8.92912	9.32294	61661	10.3755	7.4821	10.5067	9.72092	10.3292	6.78467	10.0807	7.90169	8.93376	8.81194	71021.7	9.48915	6.73038	9.38904	12.0805	9.56068	8.05266	8.87594	7.31106	9.03049	10.3428	83364.1
YPL240C	HSP82	Hsp90 chaperone required for pheromone signaling and negative regulation of Hsf1p; docks with Tom70p for mitochondrial preprotein delivery; promotes telomerase DNA binding and nucleotide addition; interacts with Cns1p, Cpr6p, Cpr7p, Sti1p	14	18	22	9.85731	6.58542	9.17875	13.7502	9.57108	5.30562	10.6402	7.59566	9.72993	8.64553	49097	9.84546	6.87295	9.99695	11.8306	10.4924	5.89087	9.55532	8.06931	9.41374	8.93711	50991.7	9.99545	7.21395	9.88728	11.9673	9.93301	5.66636	10.2662	8.23028	9.4826	8.22012	93252.9
YAL053W	FLC2	Putative FAD transporter; required for uptake of FAD into endoplasmic reticulum; involved in cell wall maintenance	8	5	6	7.67375	10.1358	13.306	9.77473	8.35452	10.0439	9.24025	6.64608	7.12257	8.589	11530.2	7.67768	10.7255	13.8617	10.6787	7.86555	9.41929	8.86445	6.70844	7.06267	7.99465	9114.69	7.85941	10.6488	13.6832	10.3749	7.66993	9.30531	8.63331	6.94619	7.32242	8.45376	7980.79
YPL105C	SYH1	Protein of unknown function that influences nuclear pore distribution; co-purifies with ribosomes; contains a GYF domain, which bind proline-rich sequences; deletion extends chronological lifespan	23	19	22	9.65289	11.9278	8.34815	9.44989	8.14419	9.80071	8.59949	8.01271	8.5098	8.45315	34432.3	9.74457	11.6665	8.23634	9.27524	8.42997	9.67438	8.4001	8.35047	8.65023	8.47143	24829.9	9.45686	12.0921	8.31532	9.57228	8.08312	9.79761	8.26728	8.47072	8.42949	8.41485	35747.1
YER182W	FMP10	Putative protein of unknown function; the authentic, non-tagged protein is detected in highly purified mitochondria in high-throughput studies	4	5	6	7.43652	13.4396	9.05805	9.27532	9.60549	8.62472	9.28578	8.52198	8.54221	7.08504	7664.92	7.22006	13.5708	9.53381	10.0559	8.82658	8.80664	9.22646	8.85431	8.0481	6.72721	6279.18	8.61774	12.5734	8.46612	8.04631	9.15716	9.09723	9.94167	8.38995	8.55812	8.07356	7117.37
YHR078W	YHR078W	High osmolarity-regulated gene of unknown function	2	2	3	7.20858	10.3332	8.02441	11.6635	6.74905	7.33686	11.2627	8.51233	9.21272	10.5878	1010.42	7.6176	9.74998	10.1752	11.2873	5.00013	7.90493	10.1824	8.72132	9.52275	10.7465	2912.61	6.8257	10.3946	9.62768	10.6255	5.6227	7.15228	11.2515	8.63975	9.29799	11.4267	5620.86
YML102W	CAC2	Component of the chromatin assembly complex (with Rlf2p and Msi1p) that assembles newly synthesized histones onto recently replicated DNA, required for building functional kinetochores, conserved from yeast to humans	7	7	10	9.37421	10.1708	8.37173	8.71423	8.96653	9.71681	8.36243	9.33962	8.85386	9.04399	9165.55	9.54907	10.6488	7.77889	8.50433	7.65619	10.5216	8.71316	9.67289	8.80206	9.06421	5714.98	9.47085	11.0867	7.04096	7.97149	8.04092	10.7339	8.80901	10.0577	8.74231	8.96963	8688.5
YLR192C	HCR1	Dual function protein involved in translation initiation as a substoichiometric component (eIF3j) of translation initiation factor 3 (eIF3) and required for processing of 20S pre-rRNA; binds to eIF3 subunits Rpg1p and Prt1p and 18S rRNA	13	13	15	10.1941	12.0877	8.42649	8.60392	8.77326	9.63235	9.10123	8.69366	8.1756	7.19963	27475.9	9.88365	12.0533	8.36508	9.07222	8.73914	10.2941	8.46675	8.49841	8.0428	7.47401	28311.5	10.3338	11.8229	8.79677	8.59198	8.67634	8.99549	9.37533	9.30045	8.24701	6.7767	44201.4
YJL082W	IML2	Protein of unknown function; the authentic, non-tagged protein is detected in highly purified mitochondria in high-throughput studies	20	14	15	7.75483	5.80423	11.481	10.2302	9.66991	6.20863	10.138	9.85981	10.1458	9.60278	24113.4	7.97626	6.35202	11.8203	10.4852	8.95747	5.85895	9.44061	10.2677	10.0481	9.71274	20876.8	7.45533	5.59184	12.6586	10.5569	9.22873	5.67086	10.0054	9.89827	10.0878	9.73386	27293.3
YGL144C	ROG1	Protein with putative serine active lipase domain	2	0	1	8.2554	8.89231	8.45052	9.2963	9.18752	10.684	9.51752	7.95273	8.86486	9.82339	1587.36	8.17594	7.87631	8.13414	9.71	9.87142	10.2149	8.7329	9.29023	9.0706	9.81184	0	0	0	0	0	0	0	0	0	0	0	1928.1
YDR316W	OMS1	Protein integral to the mitochondrial membrane; has a conserved methyltransferase motif; multicopy suppressor of respiratory defects caused by OXA1 mutations	6	5	8	7.45495	11.731	8.6964	9.65599	8.30368	9.56442	9.0504	9.10995	8.89325	8.44025	5291.88	7.87989	11.1771	9.35	10.3717	8.79877	9.35726	8.6144	8.70787	8.20206	8.41615	9644.48	7.89902	12.0022	9.44901	9.79386	7.95688	8.82297	9.02433	9.08319	8.10363	8.76308	11480.3
YMR173W	DDR48	DNA damage-responsive protein, expression is increased in response to heat-shock stress or treatments that produce DNA lesions; contains multiple repeats of the amino acid sequence NNNDSYGS	7	4	10	9.22869	7.16373	10.7788	7.13131	13.2827	4.88413	8.32129	11.7627	10.139	8.19529	5714.1	8.79175	7.18108	11.1746	7.78195	13.0155	4.49419	7.34656	12.2238	10.6411	8.29507	4430.42	8.10602	7.34508	10.904	8.08129	12.3164	4.98841	7.71928	12.3761	10.5692	8.52507	9225.82
YIL162W	SUC2	Invertase, sucrose hydrolyzing enzyme; a secreted, glycosylated form is regulated by glucose repression, and an intracellular, nonglycosylated enzyme is produced constitutively	12	7	11	9.90424	8.67293	9.08212	9.10553	9.06201	9.45319	8.22954	9.18566	8.61667	9.60363	19399.2	10.1862	8.5002	9.4293	8.89442	8.7978	9.07338	8.51245	9.02416	9.00468	9.49714	16703.7	9.83685	8.78814	9.75701	8.85307	8.9063	8.48883	8.76946	9.2766	8.58345	9.64839	24744.5
YMR277W	FCP1	Carboxy-terminal domain (CTD) phosphatase, essential for dephosphorylation of the repeated C-terminal domain of the RNA polymerase II large subunit (Rpo21p)	5	7	7	8.64618	9.38723	8.3112	8.98229	8.71822	9.71823	8.43311	9.05657	9.29988	10.375	12043.5	9.05066	9.54905	8.21667	8.59841	8.45025	9.89464	8.5042	9.52785	9.09381	10.0302	9637.59	9.17602	9.18056	8.3747	8.96306	8.56253	9.57254	8.31365	9.54481	9.16816	10.0516	10907.8
YKL129C	MYO3	One of two type I myosins; localizes to actin cortical patches; deletion of MYO3 has little effect on growth, but myo3 myo5 double deletion causes severe defects in growth and actin cytoskeleton organization	19	21	16	7.98944	6.88599	10.5804	13.0317	9.30104	5.94835	9.33877	9.51298	9.99073	8.29218	47549.2	8.20195	7.50034	10.5467	12.3856	9.47491	5.36608	10.4167	10.0964	9.55898	7.3419	48872.2	7.82392	7.35539	10.3528	12.6326	9.39997	6.06588	9.64763	9.88039	9.79076	7.91481	52457.7
YMR109W	MYO5	One of two type I myosins; contains proline-rich tail homology 2 (TH2) and SH3 domains; MYO5 deletion has little effect on growth, but myo3 myo5 double deletion causes severe defects in growth and actin cytoskeleton organization	29	38	34	8.54352	7.37733	10.026	10.6864	7.72749	8.90649	8.70497	9.21463	9.69286	10.0377	58571	8.6001	7.56449	10.3367	9.96616	7.83136	8.65861	8.98845	9.76688	9.5324	9.65993	92948.5	8.5047	7.29313	10.5448	10.2112	7.86592	8.68147	8.91996	9.23275	9.62677	10.0103	75404
YJL176C	SWI3	Subunit of the SWI/SNF chromatin remodeling complex, which regulates transcription by remodeling chromosomes; required for transcription of many genes, including ADH1, ADH2, GAL1, HO, INO1 and SUC2	30	32	35	9.59879	8.83081	8.24778	8.87359	9.03164	9.8695	9.27211	9.13123	8.88679	9.17472	40475.1	9.32058	8.91315	8.31094	9.17345	9.17024	9.89066	8.72855	9.29867	8.70286	9.39567	43024.1	9.24273	8.76585	8.76221	9.19374	9.02178	9.77113	8.75628	9.03291	8.86076	9.50142	60018.8
YDL126C	CDC48	ATPase involved in ubiquitin-mediated protein degradation; Cdc48p-Npl4p-Ufd1p complex participates in ER-associated degradation (ERAD) while Cdc48p-Npl4p-Vms1p complex participates in mitochondria-associated degradation (MAD); along with Npl4-Ufd1 complex, important for maintaining the cell wall integrity during heat stress to allow G1 progression	68	100	95	9.82265	5.20856	10.3825	10.3492	9.55079	7.46365	9.84489	9.48711	9.52691	9.26455	178907	9.68298	5.12613	10.2696	10.5346	9.54444	7.60997	10.1551	9.32788	9.54488	9.11653	193378	9.6035	5.23771	10.3338	10.5888	9.42678	7.64506	9.69165	9.54467	9.43035	9.38698	244630
YAR015W	ADE1	N-succinyl-5-aminoimidazole-4-carboxamide ribotide (SAICAR) synthetase, required for 'de novo' purine nucleotide biosynthesis; red pigment accumulates in mutant cells deprived of adenine	38	42	39	10.3817	10.4814	10.6405	11.1731	8.40218	7.6181	9.91855	8.08779	7.20653	6.94136	99264.3	10.1968	10.7216	10.6927	11.4426	8.19419	7.85595	9.83038	8.13503	6.88419	6.93346	117151	10.1516	10.686	10.4262	11.6063	8.20408	7.83669	9.66967	8.3694	6.96964	6.9559	134535
YAL039C	CYC3	Cytochrome c heme lyase (holocytochrome c synthase), attaches heme to apo-cytochrome c (Cyc1p or Cyc7p) in the mitochondrial intermembrane space; human ortholog may have a role in microphthalmia with linear skin defects (MLS)	5	4	6	8.49937	16.7798	8.80966	9.36781	8.80627	7.44927	8.70768	7.98632	7.42558	7.01732	12399.1	7.9888	16.347	8.96737	9.92192	8.92319	7.26364	8.39875	7.88654	7.83547	7.35871	10229.2	8.31428	16.1847	9.03681	9.93521	8.48481	7.13308	8.46199	8.01306	7.78661	7.53734	15459.7
YKR001C	VPS1	Dynamin-like GTPase required for vacuolar sorting; also involved in actin cytoskeleton organization, endocytosis, late Golgi-retention of some proteins, regulation of peroxisome biogenesis	39	49	46	9.83779	5.7474	10.1469	9.44582	9.74241	8.0784	9.70524	9.63026	9.2069	9.36644	115186	10.3305	6.04677	9.88396	9.68889	9.55787	7.883	9.363	9.46801	9.11583	9.58797	151189	10.0098	5.9965	9.83372	9.70643	9.71665	7.98802	9.2507	9.45324	9.15643	9.78794	165994
YOR211C	MGM1	Mitochondrial GTPase, present in complex with Ugo1p and Fzo1p; required for mt morphology and genome maintenance; exists as long and short form with different distributions; homolog of human OPA1 involved in autosomal dominant optic atrophy	14	23	23	8.56005	9.47674	8.91284	9.32482	7.61755	9.56114	10.1046	9.46183	8.80183	9.0876	32295.3	8.32422	9.33666	9.23189	9.60336	7.80012	9.43901	9.9849	9.39429	9.02957	8.75553	54579.2	8.22225	9.12127	9.25195	9.58501	7.92895	9.20793	10.0893	9.24067	9.41476	8.8397	60358.8
YLL001W	DNM1	Dynamin-related GTPase required for mitochondrial fission and morphology; assembles on the cytoplasmic face of mitochondrial tubules at sites at which division will occur; also participates in endocytosis and regulating peroxisome abundance	30	27	25	8.42336	6.71148	8.98826	10.3049	10.4398	8.33696	9.62179	9.81068	9.42945	8.83734	39343.7	8.41124	6.74923	9.00807	10.4115	10.3978	8.68343	9.3316	9.82282	9.19589	8.8786	51472.6	8.41973	6.82691	9.29687	9.86477	10.5203	8.5246	9.44791	9.22959	9.4375	9.33669	41687.8
YIL051C	MMF1	Mitochondrial protein required for transamination of isoleucine but not of valine or leucine; may regulate specificity of branched-chain transaminases Bat1p and Bat2p; interacts genetically with mitochondrial ribosomal protein genes	30	33	32	9.62877	11.8199	12.7893	10.4547	10.4061	6.17913	10.172	5.02563	8.3591	5.99514	98079.6	9.63674	11.2381	13.1502	11.4382	10.6906	5.92187	9.89924	4.59462	8.19974	6.10505	78925.7	9.74856	10.3697	13.4807	11.3455	10.7494	5.76455	9.7634	4.65502	8.77115	6.22833	85279.3
YER057C	HMF1	Member of the p14.5 protein family with similarity to Mmf1p, functionally complements Mmf1p function when targeted to mitochondria; heat shock inducible; high-dosage growth inhibitor; forms a homotrimer in vitro	7	10	9	10.3833	12.776	11.7034	9.70796	8.29564	4.87282	8.78466	9.67801	8.73228	5.90004	14946.1	10.1928	12.1561	11.0419	9.78109	8.51227	5.20109	8.74483	9.93635	9.10496	6.2508	23337.7	10.1188	11.7951	11.1311	9.36038	9.07131	5.14469	8.98104	9.89672	9.43761	5.96255	15993.6
YEL053C	MAK10	Non-catalytic subunit of N-terminal acetyltransferase of the NatC type, required for replication of dsRNA virus; expression is glucose-repressible	6	9	10	8.4186	6.73945	9.74969	8.51927	9.06809	8.78684	8.53002	9.77223	10.5961	10.7582	20971.3	8.23426	6.53931	9.10476	8.78228	9.06512	9.74928	7.8288	9.94435	11.0486	10.6087	18961.8	8.11673	6.55322	9.40034	8.5782	9.24094	9.21139	8.54208	9.6089	10.5552	11.1074	15386
YGL161C	YIP5	Protein that interacts with Rab GTPases, localized to late Golgi vesicles; computational analysis of large-scale protein-protein interaction data suggests a possible role in vesicle-mediated transport	3	5	5	6.70969	10.5994	10.8605	9.04858	8.12904	8.95193	9.39514	9.13634	9.05498	9.01681	3231.85	7.35714	10.3165	10.9774	9.09657	7.23384	9.2148	10.3271	8.83677	8.89673	8.64235	4795.62	8.54876	9.82769	9.19968	8.15613	8.39559	8.87895	10.4189	9.46374	9.52432	8.50599	6042.93
YOL109W	ZEO1	Peripheral membrane protein of the plasma membrane that interacts with Mid2p; regulates the cell integrity pathway mediated by Pkc1p and Slt2p; the authentic protein is detected in a phosphorylated state in highly purified mitochondria	27	36	46	10.8382	12.4025	8.14163	7.47444	10.0698	11.9702	8.2132	8.01872	7.11211	6.65973	81981.2	10.4802	11.8702	7.71209	7.92257	10.5182	12.5403	7.28511	7.92157	7.28183	7.34351	84240.2	9.98802	12.1115	7.8893	8.93882	9.5385	12.8203	7.19692	8.14947	7.07946	7.21652	128583
YPR181C	SEC23	GTPase-activating protein, stimulates the GTPase activity of Sar1p; component of the Sec23p-Sec24p heterodimer of the COPII vesicle coat, involved in ER to Golgi transport	34	32	28	8.98295	6.34243	10.0589	9.91615	8.22545	9.09243	9.55278	9.38181	9.68499	9.68173	62967.7	9.05649	6.32738	10.7315	10.0228	7.73302	8.87623	9.42186	9.59043	9.59054	9.55547	65013.8	8.86	6.3247	10.2325	9.77417	8.16853	8.85555	9.44341	9.82533	9.44201	9.97323	54553
YNR016C	ACC1	Acetyl-CoA carboxylase, biotin containing enzyme that catalyzes the carboxylation of acetyl-CoA to form malonyl-CoA; required for de novo biosynthesis of long-chain fatty acids	176	194	183	8.27213	6.16666	10.3138	8.513	9.33887	8.96484	10.8023	8.84263	9.67254	10.0357	458121	8.33833	5.98832	10.2612	8.52457	9.4414	8.82256	11.1147	8.65676	9.80772	9.96972	502213	8.38338	6.07603	10.332	8.4604	9.36604	8.94441	10.8226	8.45256	9.85544	10.2239	494895
YBR218C	PYC2	Pyruvate carboxylase isoform, cytoplasmic enzyme that converts pyruvate to oxaloacetate; highly similar to isoform Pyc1p but differentially regulated; mutations in the human homolog are associated with lactic acidosis	14	19	16	9.86075	5.70824	8.77767	8.48176	11.6561	8.40891	11.3124	10.4938	8.7769	7.41895	27330.4	10.0216	5.61965	8.39904	8.52287	11.5542	8.84737	10.8548	10.7943	8.51445	7.79563	33947.3	9.60396	5.51447	8.24839	8.73104	11.8299	8.84305	10.8342	10.537	8.82849	7.95926	47644.3
YGL062W	PYC1	Pyruvate carboxylase isoform, cytoplasmic enzyme that converts pyruvate to oxaloacetate; highly similar to isoform Pyc2p but differentially regulated; mutations in the human homolog are associated with lactic acidosis	8	14	11	8.40682	5.408	10.9035	7.83323	11.8329	9.53926	9.18176	9.03505	9.59446	9.19194	19021.5	8.33415	5.36094	10.1003	7.78355	12.9848	8.97871	10.4074	9.95108	8.68104	8.33122	31198.4	8.3594	5.79589	10.3428	8.05139	11.4615	10.2468	9.07127	9.88954	8.39007	9.33529	24589.7
YMR207C	HFA1	Mitochondrial acetyl-coenzyme A carboxylase, catalyzes the production of malonyl-CoA in mitochondrial fatty acid biosynthesis	3	5	4	9.10436	11.2282	6.47962	7.75895	9.10788	10.9923	8.29728	10.0335	8.83397	9.0941	5717.91	8.0859	12.286	7.12425	7.03998	9.496	11.2054	8.49837	10.0087	8.49497	8.66665	6569.93	8.56632	10.5001	7.71891	7.8272	9.72332	10.4062	9.41119	9.35999	8.96565	8.45411	3949.59
YOR209C	NPT1	Nicotinate phosphoribosyltransferase, acts in the salvage pathway of NAD+ biosynthesis; required for silencing at rDNA and telomeres and has a role in silencing at mating-type loci; localized to the nucleus	42	45	46	9.78022	6.87443	10.5311	9.79878	8.56065	9.11498	8.99076	8.88213	8.96692	9.41147	105828	9.85445	6.94272	10.5794	9.89575	8.31528	9.07246	8.89049	8.94206	8.82223	9.59214	137956	9.83655	7.10819	10.5602	10.0421	8.27689	9.08651	8.62382	8.89232	8.86814	9.60045	146962
YPL074W	YTA6	Putative ATPase of the CDC48/PAS1/SEC18 (AAA) family, localized to the cortex of mother cells but not to daughter cells	6	7	8	8.22122	10.7868	8.41689	8.8898	9.4631	10.0346	8.93482	8.66048	8.91266	8.58924	5530.71	8.36159	11.3619	8.50283	8.71566	8.36484	10.2741	9.44105	8.80318	8.41803	8.65528	11707.4	8.07719	10.7377	8.75777	9.08985	8.88429	10.4952	9.12839	9.11384	8.326	8.30777	17081.7
YER047C	SAP1	Putative ATPase of the AAA family, interacts with the Sin1p transcriptional repressor in the two-hybrid system	10	7	8	8.0447	10.7924	9.04976	9.99207	9.13661	9.62759	8.32804	8.7517	8.56792	8.60998	10970.9	8.89807	10.467	8.91135	9.48375	9.52781	8.95079	8.88887	8.56898	8.84532	8.35378	17613.3	8.47672	9.52558	9.14991	9.14689	9.00879	10.3315	8.09227	8.87509	8.22283	10.0827	13478.5
YDL174C	DLD1	D-lactate dehydrogenase, oxidizes D-lactate to pyruvate, transcription is heme-dependent, repressed by glucose, and derepressed in ethanol or lactate; located in the mitochondrial inner membrane	5	14	8	7.77423	7.99098	9.70158	9.66716	8.84909	6.86972	12.9828	10.8242	9.09237	7.11827	9987.41	7.53507	8.67533	7.92746	10.2355	8.24759	9.07947	9.34509	11.2927	8.29514	10.2723	25200.9	8.50818	8.59958	9.52061	9.15912	10.0532	6.72748	10.6152	11.3292	8.86026	7.54142	26668.4
YOR287C	RRP36	Component of 90S preribosomes; involved in early cleavages of the 35S pre-rRNA and in production of the 40S ribosomal subunit	8	12	9	9.34222	13.5743	7.2374	9.61014	8.34293	11.1263	8.16717	8.05783	7.50618	7.93308	14137.3	9.91051	14.0678	6.35845	9.05872	8.41851	12.3729	8.08764	7.20309	7.32237	8.0746	25174	9.16059	14.2629	6.93841	9.26894	8.32923	11.387	8.2549	7.64225	7.28923	8.37366	21795.9
YKL064W	MNR2	Vacuolar membrane protein required for magnesium homeostasis; putative magnesium transporter; has similarity to Alr1p and Alr2p, which mediate influx of Mg2+ and other divalent cations	5	8	6	7.85671	7.20896	11.7052	9.94615	9.69959	7.9464	9.99453	8.86202	8.78863	8.88353	5686.54	7.51668	7.1057	11.43	9.71264	9.70788	8.55124	10.3165	8.32794	9.00846	9.21832	11002.5	7.49257	7.98283	10.8296	10.1918	9.1825	8.96909	9.14784	9.83193	8.32004	8.95762	6441.36
YPR018W	RLF2	Largest subunit (p90) of the Chromatin Assembly Complex (CAF-1) with Cac2p and Msi1p that assembles newly synthesized histones onto recently replicated DNA; involved in the maintenance of transcriptionally silent chromatin	11	10	10	10.1673	11.221	8.05173	8.6167	9.50722	10.3306	7.3835	8.67993	8.57129	8.38198	19841.9	10.2173	11.4018	7.74933	8.73825	9.64402	10.4209	6.46023	8.41631	8.60469	9.24379	19237.4	10.7669	11.2024	8.91986	9.02824	9.31814	9.19638	7.2322	8.44206	8.79011	8.01207	18595.2
YDR127W	ARO1	Pentafunctional arom protein, catalyzes steps 2 through 6 in the biosynthesis of chorismate, which is a precursor to aromatic amino acids	84	96	98	9.23948	4.85237	9.50313	8.34788	11.0762	9.17479	10.5331	9.44046	9.41648	9.33866	202797	9.12311	4.97345	9.56631	8.53306	10.8719	9.59502	10.0855	9.48134	9.1445	9.54135	231131	9.22262	4.99235	9.44627	8.49252	10.9055	9.37957	10.361	9.39417	9.31258	9.42039	258770
YKR076W	ECM4	Omega class glutathione transferase; not essential; similar to Ygr154cp; green fluorescent protein (GFP)-fusion protein localizes to the cytoplasm	6	7	7	8.5787	10.2699	14.0408	9.58165	10.1248	5.44974	9.02904	7.48528	8.13956	8.15154	8520.03	8.8364	9.90588	15.424	9.37205	10.7938	4.45391	8.99762	7.26333	8.1943	7.67795	6580.24	9.03506	9.97152	12.2095	10.6628	10.3301	6.2323	7.66578	7.27079	8.19405	9.3111	10349.8
YPR060C	ARO7	Chorismate mutase, catalyzes the conversion of chorismate to prephenate to initiate the tyrosine/phenylalanine-specific branch of aromatic amino acid biosynthesis	23	15	18	9.66202	15.5904	7.64961	7.93625	7.16008	9.9711	8.10924	8.07386	8.78124	7.96402	48261.7	10.6626	15.5898	7.58754	8.40387	6.92253	10.4259	7.32181	7.8063	8.09264	8.09218	46423.9	10.2705	15.5922	7.69915	8.27067	7.14649	9.74679	7.62855	8.05108	8.36378	8.13735	58036.8
YLR340W	RPP0	Conserved ribosomal protein P0 of the ribosomal stalk, which is involved in interaction between translational elongation factors and the ribosome; similar to rat P0, human P0, and E. coli L10e; phosphorylated on serine 302	86	112	102	10.5968	9.68031	9.52188	8.51194	9.23619	7.64136	8.31535	9.46853	9.37705	8.54694	210110	10.3649	9.76561	9.28077	8.77551	8.71148	7.65257	8.64425	9.82275	8.98574	8.93146	291730	10.2804	9.39469	9.26079	8.87339	9.05937	7.76053	8.54338	9.57081	9.21179	8.94998	283745
YGR264C	MES1	Methionyl-tRNA synthetase, forms a complex with glutamyl-tRNA synthetase (Gus1p) and Arc1p, which increases the catalytic efficiency of both tRNA synthetases; also has a role in nuclear export of tRNAs	55	76	79	9.90107	5.43301	9.75997	9.25444	8.36827	9.10257	9.95761	9.37595	9.8025	9.97085	187160	9.66711	5.62397	9.12561	9.50789	8.39438	9.29574	10.4021	9.89106	9.48175	9.52938	205360	10.1935	5.60393	9.43588	9.39744	8.42694	9.20451	9.94736	9.35833	9.66775	9.66664	212777
YKL032C	IXR1	Protein that binds DNA containing intrastrand cross-links formed by cisplatin, contains two HMG (high mobility group box) domains, which confer the ability to bend cisplatin-modified DNA; mediates aerobic transcriptional repression of COX5b	10	6	8	9.33401	9.989	8.07853	8.39163	9.55963	10.9276	8.55618	9.7121	8.26378	8.10308	23279.9	9.70847	9.75816	8.10795	7.83975	9.6591	11.9483	8.07367	9.59719	7.89822	8.30238	9887.11	9.56711	10.2317	8.39629	7.96099	9.24964	11.734	8.1094	9.52114	8.25476	7.91296	24913.3
YPL009C	TAE2	Protein of unknown function, involved in protein translation; may interact with ribosomes, based on co-purification experiments; green fluorescent protein (GFP)-fusion protein localizes to the cytoplasm	17	20	19	9.88309	8.97655	8.11781	8.97721	8.74039	10.7113	8.09754	8.55572	8.64056	10.2313	45180.3	10.0882	9.09903	8.35882	9.36882	8.75891	10.1923	8.1056	8.78257	8.62995	9.51825	70274.1	10.2698	9.28311	8.27347	8.5585	8.99028	9.85315	9.27201	8.75417	8.62163	9.03824	59153
YJL104W	PAM16	Constituent of the import motor (PAM complex) component of the Translocase of the Inner Mitochondrial membrane (TIM23 complex); forms a 1:1 subcomplex with Pam18p and inhibits its cochaperone activity; contains a J-like domain	9	7	8	9.60606	14.6301	9.09047	9.3589	8.20203	8.54829	8.29536	8.00719	7.97679	7.15329	12666.3	10.031	14.6742	9.25118	8.94434	8.72544	8.389	8.89451	7.51047	7.89134	6.59051	22722.1	9.2725	14.0582	8.86977	9.57253	8.70876	8.93851	8.41456	8.02496	7.93472	7.10702	29450.8
YPL107W	YPL107W	Putative protein of unknown function; green fluorescent protein (GFP)-fusion protein localizes to mitochondria; YPL107W is not an essential gene	1	0	0	8.76802	11.8679	7.59464	6.90688	9.18522	9.70548	9.32902	9.75289	9.13903	8.66661	2184.01	0	0	0	0	0	0	0	0	0	0	0	0	0	0	0	0	0	0	0	0	0	0
YOL115W	PAP2	Non-canonical poly(A) polymerase, involved in nuclear RNA degradation as a component of the TRAMP complex; catalyzes polyadenylation of hypomodified tRNAs, and snoRNA and rRNA precursors; overlapping but non-redundant functions with Trf5p	9	9	7	8.28879	7.85284	7.36516	7.82432	8.58611	12.8559	8.75679	9.04361	9.36961	11.0254	19054.8	8.1508	8.41152	7.64581	8.22093	8.47394	12.4433	7.99638	8.65471	9.51571	11.3824	20629.2	8.06314	8.09964	7.54059	7.94958	8.58515	12.887	8.21663	8.77932	9.36638	11.4422	15426.5
YNL299W	TRF5	Non-canonical poly(A) polymerase, involved in nuclear RNA degradation as a component of the TRAMP complex; catalyzes polyadenylation of hypomodified tRNAs, and snoRNA and rRNA precursors; overlapping but non-redundant functions with Pap2p	1	0	1	7.95545	10.4	7.6065	8.63799	7.80649	11.6385	9.06279	8.10073	9.0965	10.6373	1383.98	7.24225	11.1158	5.6892	8.39426	8.56177	10.3471	9.05264	9.64498	8.89153	11.9844	0	0	0	0	0	0	0	0	0	0	0	1510.43
YGL065C	ALG2	Mannosyltransferase that catalyzes two consecutive steps in the N-linked glycosylation pathway; alg2 mutants exhibit temperature-sensitive growth and abnormal accumulation of the lipid-linked oligosaccharide Man2GlcNAc2-PP-Dol	10	9	10	6.79643	6.85864	9.74725	10.197	9.03175	10.3712	9.03132	9.22242	8.92986	10.7472	11907.2	7.00115	6.82617	9.39388	10.0943	8.08863	10.5234	9.83302	8.79671	9.26377	11.0673	18125.6	6.79237	6.33772	9.65901	10.3301	8.32245	10.7953	9.72668	8.94782	8.85335	11.1348	19234.3
YDR036C	EHD3	3-hydroxyisobutyryl-CoA hydrolase, member of a family of enoyl-CoA hydratase/isomerases; non-tagged protein is detected in highly purified mitochondria in high-throughput studies; phosphorylated; mutation affects fluid-phase endocytosis	7	11	10	9.96212	8.13614	9.9726	9.57708	10.7155	7.76851	8.42731	8.70417	8.76019	8.86939	15247	9.74821	8.36704	9.4508	9.35777	10.7672	8.13418	8.27211	9.37842	8.91308	8.51867	21834.8	9.61022	8.61771	9.69557	9.6992	10.4032	7.97948	8.2526	9.16809	8.68635	8.79137	23218.9
YJR069C	HAM1	Conserved protein with deoxyribonucleoside triphosphate pyrophosphohydrolase activity, mediates exclusion of noncanonical purines from deoxyribonucleoside triphosphate pools; mutant is sensitive to the base analog 6-N-hydroxylaminopurine	13	16	15	9.52984	14.9616	9.22015	8.98645	7.86454	7.94952	8.86393	8.0763	8.53756	6.87459	34357.4	9.54503	16.1909	9.11493	8.98584	7.36482	8.09542	8.74396	8.35704	7.80311	6.70601	39524.8	9.63243	15.3622	9.29214	9.21873	7.40152	8.18719	8.49586	8.55406	7.97859	6.77641	62914.4
YDR116C	MRPL1	Mitochondrial ribosomal protein of the large subunit	3	8	7	9.30575	12.3956	8.86492	8.60424	9.14667	9.45352	7.4602	9.06713	8.63614	7.96425	6419.53	9.37081	12.3614	9.21299	8.68855	8.65923	9.51686	8.03976	8.81946	8.50203	7.72591	14516.9	9.54654	12.4224	9.55243	8.20394	8.96901	9.10984	8.09676	9.0041	8.4376	7.57993	13184.1
YPL217C	BMS1	GTPase required for synthesis of 40S ribosomal subunits and for processing the 35S pre-rRNA at sites A0, A1, and A2; interacts with Rcl1p, which stimulates its GTPase and U3 snoRNA binding activities; has similarity to Tsr1p	42	46	42	7.81149	8.40746	7.10923	8.38075	7.73923	11.86	9.24816	9.03638	10.302	11.0683	63547.8	7.60581	8.46698	6.76637	8.32432	7.55541	12.2677	9.14147	9.48414	10.1416	11.147	94610.9	7.83788	8.50706	6.89269	8.37505	7.86196	11.6155	9.35801	9.1944	10.3179	10.9559	100347
YPR189W	SKI3	Ski complex component and TPR protein, mediates 3'-5' RNA degradation by the cytoplasmic exosome; null mutants have superkiller phenotype of increased viral dsRNAs and are synthetic lethal with mutations in 5'-3' mRNA decay	27	36	33	7.65044	8.66959	8.92318	9.27013	8.58031	9.19349	9.77651	9.55664	9.30355	9.99505	63482.5	7.6651	8.48103	8.86045	9.23554	8.63521	9.54352	9.62074	9.08661	9.54112	10.236	113529	7.87396	8.3063	8.76735	9.26999	8.83077	9.09846	9.77987	8.94674	9.72204	10.3079	113468
YNL118C	DCP2	Catalytic subunit of the Dcp1p-Dcp2p decapping enzyme complex, which removes the 5' cap structure from mRNAs prior to their degradation; member of the Nudix hydrolase family	34	31	33	8.76588	8.33429	8.93236	10.0582	8.54415	9.88307	9.09353	9.20102	9.04655	9.05522	66558.2	8.91079	8.24151	8.86738	10.7584	8.0344	10.3566	8.38753	8.75673	9.28414	9.27726	52694.9	8.84927	8.03308	8.88177	11.1993	8.00273	10.3445	7.93443	8.33954	9.39288	9.90332	66245.4
YMR125W	STO1	Large subunit of the nuclear mRNA cap-binding protein complex, interacts with Npl3p to carry nuclear poly(A)+ mRNA to cytoplasm; also involved in nuclear mRNA degradation and telomere maintenance; orthologous to mammalian CBP80	26	29	29	9.19043	5.84202	8.63721	8.53903	9.0898	10.319	9.52805	9.51233	9.48161	10.8056	54608.7	9.09471	5.58066	8.54494	8.94752	8.96529	10.4522	9.1915	9.82272	9.56887	10.7451	53169.4	9.24064	5.88227	8.87205	8.67427	9.08038	10.2212	9.22207	9.76637	9.31958	10.6386	54594.7
YMR261C	TPS3	Regulatory subunit of trehalose-6-phosphate synthase/phosphatase complex, which synthesizes the storage carbohydrate trehalose; expression is induced by stress conditions and repressed by the Ras-cAMP pathway	33	24	33	7.03523	6.70179	10.8447	10.9598	9.26734	6.84348	10.1615	9.89845	10.2928	8.88776	56308.2	6.95312	7.2242	11.112	9.94706	9.833	6.33045	11.6045	9.40205	9.53827	8.97211	58152.9	7.60431	6.75838	10.675	10.6677	9.28264	6.52164	11.3338	9.42881	10.1942	8.42139	89550.8
YML100W	TSL1	Large subunit of trehalose 6-phosphate synthase (Tps1p)/phosphatase (Tps2p) complex, which converts uridine-5'-diphosphoglucose and glucose 6-phosphate to trehalose, similar to Tps3p and may share function; mutant has aneuploidy tolerance	28	28	25	4.87615	4.7367	14.7557	13.0954	10.7816	3.05666	9.6638	11.1744	11.7311	6.97952	65002.4	4.7532	4.72282	15.263	12.8421	11.1724	2.85171	9.9678	10.8215	11.8313	6.63714	66403.9	4.98325	4.5148	14.5026	12.7021	11.0015	3.28361	10.1318	10.7379	11.7831	7.2337	56763.4
YLR412W	BER1	Protein involved in microtubule-related processes, N-acetylation; GFP-fusion protein localizes to the cytoplasm and is induced in response to the DNA-damaging agent MMS; YLR412W is not an essential gene; similar to Arabidopsis SRR1 gene	6	5	7	10.0447	13.4596	7.50926	7.4607	8.79815	9.33051	7.75766	9.23775	8.78287	8.5242	10123.1	9.4583	12.8424	7.16862	7.34019	8.91945	10.2036	7.43102	9.88316	8.71468	8.95808	6191.91	9.47788	13.3341	7.5324	7.48673	8.61324	9.9673	7.88066	8.95199	8.58854	9.09189	9469.31
YNL139C	THO2	Subunit of the THO complex, which is required for efficient transcription elongation and involved in transcriptional elongation-associated recombination; required for LacZ RNA expression from certain plasmids	15	14	20	5.3094	6.77652	8.05519	8.39514	7.92676	10.4308	8.043	7.97522	11.7675	16.3247	33880.9	5.75304	6.4895	7.88924	7.82261	7.89511	10.7149	8.39702	8.15554	11.4904	16.3309	29552.3	5.71487	6.58977	7.93271	7.78088	7.74877	10.638	8.39379	7.8596	11.5492	16.6969	39213.6
YDR464W	SPP41	Protein involved in negative regulation of expression of spliceosome components PRP4 and PRP3	7	5	5	8.43769	9.99391	7.63649	8.79136	9.7477	10.2327	7.91663	10.1541	9.14335	8.86878	5301.86	9.266	11.1156	7.26391	8.32638	9.97248	9.80894	8.00655	10.0499	8.87815	8.2163	7507.43	8.97843	10.7515	7.49688	8.7953	10.0218	9.41833	8.02206	9.98113	8.88863	8.5641	8119.43
YMR204C	INP1	Peripheral membrane protein of peroxisomes involved in peroxisomal inheritance; recruitment to peroxisomes is mediated by interaction with Pex3p at the peroxisomal membrane	0	1	1	0	0	0	0	0	0	0	0	0	0	0	9.24304	8.91831	8.50796	10.3064	8.90826	8.51579	9.22421	8.77518	9.25154	9.25233	1998.1	10.1269	9.3788	9.44825	9.41034	8.34328	9.51813	9.43962	8.16487	7.35055	9.71956	1280.44
YFL036W	RPO41	Mitochondrial RNA polymerase; single subunit enzyme similar to those of T3 and T7 bacteriophages; requires a specificity subunit encoded by MTF1 for promoter recognition	7	12	12	8.99838	11.7878	9.26166	9.75017	8.88319	7.66564	8.31797	8.86325	8.71486	8.64054	12893	8.92264	11.0747	9.29867	9.3816	9.42975	7.32793	8.68095	9.11709	9.13849	8.54218	25673.2	8.74541	11.3418	9.24451	9.599	9.06048	7.42024	8.69658	8.91791	9.03459	8.83476	24429.9
YNL088W	TOP2	Topoisomerase II, relieves torsional strain in DNA by cleaving and re-sealing the phosphodiester backbone of both positively and negatively supercoiled DNA; cleaves complementary strands; localizes to axial cores in meiosis	43	42	45	6.44364	6.12124	7.50172	8.24525	9.11079	11.6744	9.02097	8.60163	10.3656	13.903	77436.3	6.81642	6.13033	7.59656	8.03292	9.33456	11.6065	9.27084	8.41778	10.2532	13.4564	90194.1	6.62596	6.14497	7.77201	8.00736	9.25045	11.6366	9.01196	8.51158	10.25	13.7111	103846
YDR168W	CDC37	Essential Hsp90p co-chaperone; necessary for passage through the START phase of the cell cycle; stabilizes protein kinase nascent chains and participates along with Hsp90p in their folding	24	20	30	10.6683	7.13412	10.1615	10.11	9.78756	7.41511	10.0162	8.45498	8.73281	8.40206	72923.8	10.3515	7.06882	10.1456	10.3404	9.97864	7.1758	9.36418	8.57273	9.21168	8.70461	58971.1	10.2806	7.08829	10.5163	10.8278	9.6934	7.27241	9.02961	8.6334	8.95469	8.58774	99508.1
YLR436C	ECM30	Putative protein of unknown function; may play a role in cell wall biosynthesis, mutants have abormal relative levels of mannose and glucose and have Gap1p sorting and transport defects; (GFP)-fusion protein localizes to the cytoplasm	1	1	6	12.7311	7.35058	7.12929	12.9825	9.20619	7.06196	12.2068	7.26965	7.77281	7.13807	231.806	7.32991	8.65035	8.75731	9.56066	8.125	10.3029	9.62449	8.47536	10.0641	9.9988	589.573	7.5679	9.12868	9.4685	9.80514	8.04999	8.94159	9.53779	7.92455	9.98765	10.4793	3837.27
YDR309C	GIC2	Redundant rho-like GTPase Cdc42p effector; homolog of Gic1p; involved in initiation of budding and cellular polarization; interacts with Cdc42p via the Cdc42/Rac-interactive binding (CRIB) domain and with PI(4,5)P2 via a polybasic region	3	1	1	5.51814	7.02394	5.45042	19.3727	5.70217	12.1607	6.41979	9.74563	7.25762	12.2772	6189.93	8.55404	11.0013	8.87153	8.72187	8.20755	8.79542	7.42774	9.59212	8.98836	10.7618	1314.06	10.0423	10.1957	10.3078	8.073	8.52323	9.1118	7.01844	9.58531	8.27314	9.78893	1190.93
YBR155W	CNS1	TPR-containing co-chaperone; binds both Hsp82p (Hsp90) and Ssa1p (Hsp70) and stimulates the ATPase activity of SSA1, ts mutants reduce Hsp82p function while over expression suppresses the phenotypes of an HSP82 ts allele and a cpr7 deletion	23	25	26	10.8008	11.5431	8.03133	8.7436	9.02774	10.1658	8.34959	8.38984	7.85156	7.99495	38604.7	10.897	11.1019	8.13877	8.81494	9.38103	10.2415	8.27993	8.15706	8.05431	7.83369	61630.1	10.7688	10.9998	8.17529	9.09168	9.13456	10.1132	8.01814	8.32099	8.14321	8.14391	77208.4
YNL297C	MON2	Peripheral membrane protein with a role in endocytosis and vacuole integrity, interacts with Arl1p and localizes to the endosome; member of the Sec7p family of proteins	13	31	22	7.84901	8.00613	8.8322	9.38718	8.95358	8.77774	10.1574	9.5743	9.7036	9.67466	13704.5	7.25773	8.19284	8.43059	9.67795	8.75752	9.5328	8.99765	9.75874	9.61121	10.6826	49080.6	7.49602	8.20828	9.09838	9.64717	8.95327	8.92189	9.22461	9.52511	9.7944	10.0331	35903.9
YJR144W	MGM101	Protein involved in mitochondrial genome maintenance; component of the mitochondrial nucleoid, required for the repair of oxidative mtDNA damage	15	11	13	9.21751	13.2207	7.53076	9.10441	7.74102	8.93436	8.07351	9.01742	8.71525	9.34702	23352.4	9.06813	13.2771	7.71023	8.68209	8.12411	8.60748	7.87241	9.27776	8.57277	9.73164	37863.7	9.27278	12.7942	7.91467	9.22992	7.88118	8.61022	7.7149	9.17509	8.74448	9.55768	51431.9
YOL130W	ALR1	Plasma membrane Mg(2+) transporter, expression and turnover are regulated by Mg(2+) concentration; overexpression confers increased tolerance to Al(3+) and Ga(3+) ions	4	9	8	8.55477	8.65986	10.4843	10.2449	7.29225	10.4093	8.9291	8.67043	8.93829	8.72899	10628.3	8.75536	8.90205	10.3261	9.79434	8.04838	9.98715	8.92208	8.58535	8.9618	8.60136	22176.3	8.70832	8.84881	10.5767	10.0517	8.01774	9.46553	9.11258	8.68556	8.88418	8.5483	19600.3
YOR359W	VTS1	Post-transcriptional gene regulator, flap-structured DNA-binding and RNA-binding protein; shows genetic interactions with Vti1p, a v-SNARE involved in cis-Golgi membrane traffic; stimulates Dna2p endonuclease activity; contains a SAM domain	4	4	5	8.34262	12.7564	7.96774	8.53861	8.81232	9.38002	8.44604	9.13365	9.37032	8.1554	3192.35	10.0783	13.1922	7.9108	7.71506	8.22869	9.59364	8.01313	9.08654	8.36454	8.74235	5013.57	12.1501	11.8005	6.69562	6.86334	7.83682	10.6921	9.39506	8.70298	8.80856	7.98393	7329.86
YDR232W	HEM1	5-aminolevulinate synthase, catalyzes the first step in the heme biosynthetic pathway; an N-terminal signal sequence is required for localization to the mitochondrial matrix; expression is regulated by Hap2p-Hap3p	24	22	25	9.49572	11.5071	7.38042	7.80891	8.87195	12.2789	7.38572	9.23466	8.3525	8.61707	47708.3	10.1485	11.7716	7.77817	7.55573	8.82709	11.7623	7.69252	9.02313	8.11758	8.22329	65290.6	10.2892	11.296	7.35358	7.55704	9.1423	11.7201	8.03489	9.00206	8.4986	8.04256	73805.8
YOR206W	NOC2	Protein that forms a nucleolar complex with Mak21p that binds to 90S and 66S pre-ribosomes, as well as a nuclear complex with Noc3p that binds to 66S pre-ribosomes; both complexes mediate intranuclear transport of ribosomal precursors	27	25	20	7.17363	8.38425	6.74202	7.9501	6.96623	13.9163	8.55285	8.75264	9.96549	12.59	52866.2	7.12595	8.40427	6.65798	7.91837	7.09876	13.9226	8.43193	8.80863	10.0323	12.4924	45878.1	7.17831	8.72345	6.22153	7.81348	6.90436	14.647	8.16482	8.75721	9.69429	12.8226	50884.2
YML085C	TUB1	Alpha-tubulin; associates with beta-tubulin (Tub2p) to form tubulin dimer, which polymerizes to form microtubules	17	15	18	9.43911	7.04317	9.04478	8.24373	10.0861	9.31911	9.64962	8.87728	9.48305	9.73837	38777.6	9.38563	7.77152	9.23796	8.32647	9.53938	9.73309	9.53564	8.94489	8.98884	9.45442	41016.4	9.31835	7.57483	9.06992	8.15234	9.90781	8.98781	9.87222	9.1135	9.38844	9.53679	42373.3
YML124C	TUB3	Alpha-tubulin; associates with beta-tubulin (Tub2p) to form tubulin dimer, which polymerizes to form microtubules; expressed at lower level than Tub1p	10	11	18	9.16161	8.00559	9.22578	8.98278	9.20606	8.9787	8.93049	9.44188	9.39395	9.5907	17730.6	9.24403	7.87035	9.218	8.892	9.12076	9.09768	8.89418	9.00664	9.43814	10.137	30493.4	9.21371	7.66726	9.33659	9.07687	8.85931	9.12758	8.94463	9.12024	9.45079	10.1094	48386.2
YLR058C	SHM2	Cytosolic serine hydroxymethyltransferase, converts serine to glycine plus 5,10 methylenetetrahydrofolate; major isoform involved in generating precursors for purine, pyrimidine, amino acid, and lipid biosynthesis	63	74	66	10.0087	13.6216	10.7529	10.3384	10.0803	7.02346	8.36985	7.24239	6.99844	6.40151	171320	9.62259	12.3163	10.8723	11.2941	9.54433	7.67009	7.74006	7.17977	7.40207	7.23011	157627	9.8351	13.2154	10.8777	10.8693	9.70091	7.25596	8.03894	7.23964	7.1107	6.7416	174935
YBR263W	SHM1	Mitochondrial serine hydroxymethyltransferase, converts serine to glycine plus 5,10 methylenetetrahydrofolate; involved in generating precursors for purine, pyrimidine, amino acid, and lipid biosynthesis; reverse reaction generates serine	42	39	37	10.9134	9.16539	8.63993	9.17554	9.33947	9.15743	8.94949	8.4139	8.79879	8.34713	96277.3	11.3209	9.29731	8.97499	8.95285	9.19005	8.62831	9.03826	8.54941	8.87275	8.09683	108501	10.6976	9.68911	8.90283	9.30358	9.00688	9.10422	8.73657	8.55593	8.52265	8.38434	114829
YGL253W	HXK2	Hexokinase isoenzyme 2 that catalyzes phosphorylation of glucose in the cytosol; predominant hexokinase during growth on glucose; functions in the nucleus to repress expression of HXK1 and GLK1 and to induce expression of its own gene	95	106	98	11.0853	8.04627	10.2032	8.86497	10.2387	6.43543	9.04988	9.52226	9.24965	8.18645	228322	11.1436	8.02398	10.1744	8.78016	10.0865	6.58585	8.79188	9.80754	9.14472	8.40357	244462	11.1548	8.19761	10.0361	8.62719	10.1818	6.51515	9.03699	9.85839	9.12084	8.1816	224427
YFR053C	HXK1	Hexokinase isoenzyme 1, a cytosolic protein that catalyzes phosphorylation of glucose during glucose metabolism; expression is highest during growth on non-glucose carbon sources; glucose-induced repression involves the hexokinase Hxk2p	27	35	25	4.71898	8.0195	13.383	12.3104	9.24515	3.56625	8.27214	14.0134	11.9324	5.3892	47490.5	3.9464	7.98591	14.5703	12.9407	9.35071	2.1144	8.26837	15.4879	11.9783	4.20991	60903.3	4.49511	8.08533	13.1552	12.8404	9.02064	3.32104	8.13567	14.8071	11.7515	5.26615	65805.8
YKL010C	UFD4	Ubiquitin-protein ligase (E3) that interacts with Rpt4p and Rpt6p, two subunits of the 19S particle of the 26S proteasome; cytoplasmic E3 involved in the degradation of ubiquitin fusion proteins	14	15	17	7.31641	9.49518	8.86174	9.16668	9.44034	8.8513	8.79731	9.36046	9.51505	10.1138	22125.8	6.86664	8.99526	8.34616	8.56314	9.23164	7.94751	8.34996	8.85745	14.7223	9.01857	30229.3	7.15362	9.30783	8.70081	9.26269	9.52112	8.96556	8.54702	9.00383	9.71315	10.7296	30463.5
YPR172W	YPR172W	Protein of unknown function, transcriptionally activated by Yrm1p along with genes involved in multidrug resistance	3	8	6	8.45892	11.7701	9.975	10.6296	10.4902	5.772	9.23709	9.32072	7.94943	7.24292	5453.16	8.4095	11.6889	10.1857	10.4242	11.1322	5.4727	10.4344	8.20001	8.0893	6.8677	15724.5	8.71892	10.5195	9.98542	10.2134	10.6542	5.92067	10.0816	8.73052	8.79927	7.26988	18481.2
YGR041W	BUD9	Protein involved in bud-site selection; mutant has increased aneuploidy tolerance; diploid mutants display a unipolar budding pattern instead of the wild-type bipolar pattern, and bud at the distal pole	0	1	2	0	0	0	0	0	0	0	0	0	0	0	7.26067	8.37024	10.2495	7.92223	10.1556	11.6123	9.80127	8.30457	8.68455	8.51835	9399.04	7.17009	8.22821	11.5562	7.54199	10.3659	10.7158	10.0431	7.78611	8.91665	8.62292	12128.7
YDR324C	UTP4	Subunit of U3-containing 90S preribosome and Small Subunit (SSU) processome complexes involved in production of 18S rRNA and assembly of small ribosomal subunit; member of t-Utp subcomplex involved with transcription of 35S rRNA transcript	15	27	26	7.22287	8.66098	6.88294	7.41802	7.20861	14.002	7.95916	8.12915	10.1408	13.378	31088.8	7.05938	8.30791	7.11654	7.57151	7.00348	13.929	8.14088	7.85864	10.2548	13.6592	71167.8	7.34827	8.2626	7.15006	7.31788	7.31709	13.9948	8.21618	7.86392	10.0684	13.3899	65993.9
YOR354C	MSC6	Protein of unknown function; mutant is defective in directing meiotic recombination events to homologous chromatids; the authentic, non-tagged protein is detected in highly purified mitochondria in high-throughput studies	15	16	18	9.39413	10.0075	9.57524	9.24446	9.24863	8.58502	8.96556	9.26866	8.51829	8.08301	19707.3	9.42454	10.0301	9.84348	9.02185	9.44103	8.31645	8.39594	9.44504	8.77876	8.21149	26719.4	9.43241	9.76522	9.90492	9.37525	9.26694	8.2347	8.46518	9.32776	9.05022	8.08406	33943.6
YJL033W	HCA4	Putative nucleolar DEAD box RNA helicase; high-copy number suppression of a U14 snoRNA processing mutant suggests an involvement in 18S rRNA synthesis	20	25	23	8.51344	9.08424	6.90735	8.36117	8.20067	11.8933	9.23115	8.63067	9.55297	10.5773	42134.5	8.49313	9.52837	7.04836	8.15687	8.53596	11.8705	8.51252	8.77626	9.34307	10.6373	62762	8.44772	9.41897	7.19004	8.46699	8.2573	11.8445	8.66459	8.25663	9.54182	10.8268	62562.7
YHR029C	YHI9	Protein of unknown function; null mutant is defective in unfolded protein response; possibly involved in a membrane regulation metabolic pathway; member of the PhzF superfamily, though most likely not involved in phenazine production	8	6	6	9.99894	9.64376	7.24482	7.51207	12.6414	9.31067	10.5613	8.77685	7.7163	7.48493	18329.4	9.96481	9.48096	6.7455	7.5246	13.6971	9.31406	10.713	8.42923	7.73727	7.313	7073.06	9.67877	9.85073	7.90045	7.82378	11.7024	9.4998	9.19787	9.36091	7.97396	7.94908	12954.5
YLR422W	YLR422W	Protein of unknown function with similarity to human DOCK proteins (guanine nucleotide exchange factors); interacts with Ino4p; green fluorescent protein (GFP)-fusion protein localizes to the cytoplasm, YLR422W is not an essential protein	4	16	10	6.73302	9.12183	9.07301	9.34283	9.5774	9.89852	8.19969	11.7133	7.88955	9.36731	2991.3	6.9446	8.63833	9.3988	9.73026	8.729	9.57351	10.5298	8.53856	9.36565	9.44139	36829.6	6.80423	8.48229	9.79011	9.17883	9.52879	8.80446	10.1725	8.79407	9.33522	10.0201	12161
YGR163W	GTR2	Putative GTP binding protein that negatively regulates Ran/Tc4 GTPase cycle; activates transcription; subunit of EGO and GSE complexes; required for sorting of Gap1p; localizes to cytoplasm and to chromatin; homolog of human RagC and RagD	3	4	3	8.3371	8.98138	10.3058	9.10712	9.45748	8.5859	10.3184	9.26793	8.79488	7.73313	8622.28	8.07849	9.27511	9.38443	9.41641	9.72337	8.9521	9.72709	9.0078	8.88814	8.44251	10685.5	8.24991	8.96388	8.93228	9.33181	9.41722	9.15292	10.1391	9.53825	9.26297	7.92501	11276.7
YNL246W	VPS75	NAP family histone chaperone; binds to histones and Rtt109p, stimulating histone acetyltransferase activity; possesses nucleosome assembly activity in vitro; proposed role in vacuolar protein sorting and in double-strand break repair	6	4	5	8.55755	9.22975	9.07401	8.57234	10.2134	8.97465	8.89899	8.94998	9.11669	9.32421	9529.63	8.72736	7.96791	8.30743	8.23441	10.5401	9.06688	10.1566	9.01792	9.02515	9.88273	6862.93	9.65286	9.66285	7.86346	7.47497	10.8155	8.80988	10.2209	8.72238	8.89355	8.81396	18918.5
YPR108W	RPN7	Essential, non-ATPase regulatory subunit of the 26S proteasome, similar to another S. cerevisiae regulatory subunit, Rpn5p, as well as to mammalian proteasome subunits	23	29	26	8.12936	7.09367	10.1277	9.21817	8.7906	8.70866	9.36869	9.04935	9.82548	10.6132	59043.2	7.84198	6.99822	10.2785	9.29626	9.26635	8.24335	9.78107	8.86852	10.1	10.2397	71094.9	7.88172	6.79905	9.85769	9.73728	8.743	9.0584	9.04263	8.36707	10.2657	11.1431	77362.2
YDL001W	RMD1	Cytoplasmic protein required for sporulation	6	4	3	7.71543	9.38858	8.64213	9.14476	8.39609	10.1183	9.6705	8.72223	9.33917	9.7862	6158.85	7.71885	10.1934	8.196	8.70768	8.01012	10.8153	9.91478	8.58798	8.76639	9.99152	5148.57	7.18972	10.0309	8.44679	9.53393	7.64061	10.9187	9.07051	9.64847	8.65205	9.7764	3085.75
YPR081C	GRS2	Protein with sequence similarity to Grs1p, which is a glycyl-tRNA synthetase; cannot substitute for Grs1p; possible pseudogene that is expressed at very low levels	7	5	7	7.65625	7.11187	9.89511	9.5096	11.1017	9.46318	9.5293	8.72711	8.82584	9.09085	13532.2	7.91524	6.67404	10.4944	9.45232	11.1061	7.35138	9.72236	8.63972	9.91918	9.6364	5022.97	7.77378	6.20275	9.83795	9.87399	11.4993	7.20862	9.60901	9.14993	9.82235	9.92524	15385.8
YBR247C	ENP1	Protein associated with U3 and U14 snoRNAs, required for pre-rRNA processing and 40S ribosomal subunit synthesis; localized in the nucleus and concentrated in the nucleolus	24	23	21	8.43539	11.0107	7.22734	8.68244	7.83022	12.8983	7.32829	8.18637	8.89445	10.4595	52090.6	8.98542	11.0825	7.97477	8.23471	8.10194	11.3166	8.35272	8.21863	9.06423	9.56795	76965.4	8.93268	10.8294	7.96333	8.41647	8.07851	11.908	7.75532	7.99738	8.84703	10.1892	71321.6
YIL026C	IRR1	Subunit of the cohesin complex, which is required for sister chromatid cohesion during mitosis and meiosis and interacts with centromeres and chromosome arms, essential for viability	5	6	10	6.26678	7.58105	7.53145	8.40414	7.52044	11.41	8.13991	8.81259	10.5571	14.7693	6915.25	7.26981	7.65055	7.77924	7.68372	8.51247	10.4394	8.19033	9.23331	10.8042	13.3683	9199.72	6.73314	7.72467	8.07971	7.86118	7.78727	10.511	8.00426	9.03266	11.1594	14.0188	19995
YNL080C	EOS1	Protein involved in N-glycosylation; deletion mutation confers sensitivity to exidative stress and shows synthetic lethality with mutations in the spindle checkpoint genes BUB3 and MAD1; YNL080C is not an essential gene	2	2	2	7.2867	11.5404	8.42637	8.37143	8.90665	9.8673	9.71025	8.2094	8.80063	9.7957	2096.99	6.77533	12.6544	8.73369	8.4983	8.21922	10.9729	9.27618	7.93424	8.20181	9.62205	1946.51	7.59832	10.6882	8.0381	8.00732	8.93007	10.8469	10.8426	8.42918	8.58028	8.96734	2353.76
YOL040C	RPS15	Protein component of the small (40S) ribosomal subunit; has similarity to E. coli S19 and rat S15 ribosomal proteins	30	33	34	10.0582	10.3699	8.13627	9.3236	8.13289	8.66833	8.07204	10.3062	8.59079	9.24676	52944.3	9.9482	10.4552	8.43712	8.2237	9.43855	7.75982	9.21105	10.2347	8.71483	8.51547	32864.2	10.5654	10.0859	7.98396	8.41311	8.8375	8.00428	9.15465	10.0156	9.2947	8.55467	54654.2
YLR450W	HMG2	One of two isozymes of HMG-CoA reductase that convert HMG-CoA to mevalonate, a rate-limiting step in sterol biosynthesis; overproduction induces assembly of peripheral ER membrane arrays and short nuclear-associated membrane stacks	9	9	15	7.27277	7.82425	9.40096	8.41067	8.00271	9.66447	10.4153	8.85357	9.11534	11.9789	18395	7.69871	8.01769	8.90626	8.79865	7.66069	9.75663	9.999	8.95717	9.32621	11.8044	13333.1	7.33998	7.7787	9.29541	8.75431	7.62868	9.61739	10.2916	8.81296	9.42048	11.9654	32823.2
YML075C	HMG1	One of two isozymes of HMG-CoA reductase that catalyzes the conversion of HMG-CoA to mevalonate, which is a rate-limiting step in sterol biosynthesis; localizes to the nuclear envelope; overproduction induces the formation of karmellae	13	16	17	6.24582	9.07014	7.62094	8.13773	6.62194	12.6346	10.5167	7.20285	12.3958	10.5268	19416.3	5.99969	8.07009	7.50349	7.95256	6.4682	10.5902	9.69881	7.12095	17.9112	9.56899	29317.1	5.95686	9.12713	8.32894	8.56096	7.4986	12.7528	10.8493	8.33372	8.38246	11.1321	34262.8
YDL010W	GRX6	Cis-golgi localized monothiol glutaredoxin that binds an iron-sulfur cluster; more similar in activity to dithiol than other monothiol glutaredoxins; involved in the oxidative stress response; functional overlap with GRX7	2	4	5	7.44456	12.362	9.90797	7.14149	7.86713	9.99768	10.4348	8.6814	8.18746	8.88089	1956.63	7.8207	12.0996	8.83334	9.05129	7.43645	10.7947	7.66423	9.51064	7.86064	9.81862	5017.28	7.93972	12.5182	9.51615	7.8914	7.8928	9.86748	8.42561	8.74456	8.9043	9.22228	8508.22
YFR051C	RET2	Delta subunit of the coatomer complex (COPI), which coats Golgi-derived transport vesicles; involved in retrograde transport between Golgi and ER	12	10	15	9.90459	6.33542	10.0998	11.9783	7.9548	8.9812	8.0561	7.92415	9.71421	9.96505	25772	10.1933	7.01477	10.1233	9.76736	8.66815	8.3155	9.22825	9.16862	9.49218	8.94297	38258.9	10.1718	7.09292	10.0258	9.03704	9.65092	8.9664	8.76727	9.08508	8.88297	9.23194	34180.1
YEL026W	SNU13	RNA binding protein, part of U3 snoRNP involved in rRNA processing, part of U4/U6-U5 tri-snRNP involved in mRNA splicing, similar to human 15.5K protein	11	11	10	10.8597	11.8028	8.47222	8.14357	8.30292	10.5286	8.67262	8.67014	8.19093	7.25582	15460.7	10.9068	11.963	8.78746	8.07802	8.20896	10.3496	8.03223	8.45621	8.26361	7.86349	10330.6	10.9875	11.8966	8.53568	8.18068	7.9491	10.2896	8.49764	8.45784	8.34504	7.77806	13934.6
YML072C	TCB3	Lipid-binding protein, localized to the bud via specific mRNA transport; non-tagged protein detected in a phosphorylated state in mitochondria; GFP-fusion protein localizes to the cell periphery; C-termini of Tcb1p, Tcb2p and Tcb3p interact	48	56	50	8.41996	4.79219	10.401	9.77961	9.02912	9.13491	10.1148	9.67392	9.67238	9.90652	113914	8.47339	4.62525	10.6734	9.54745	9.51046	9.21432	9.85343	9.50716	9.47077	10.0302	120155	8.25417	4.86059	10.4406	9.74198	9.23002	8.981	9.829	9.84338	9.74534	9.98054	131086
YGR202C	PCT1	Cholinephosphate cytidylyltransferase, also known as CTP:phosphocholine cytidylyltransferase, rate-determining enzyme of the CDP-choline pathway for phosphatidylcholine synthesis, inhibited by Sec14p, activated upon lipid-binding	13	17	12	10.1784	8.79341	9.07926	8.76151	10.0782	8.52417	9.4516	9.01283	8.76785	8.24861	16861.9	9.59044	8.56605	8.3111	9.0612	9.95844	9.05788	8.97009	9.45552	8.57348	9.37163	27055.9	9.53596	8.56905	8.51153	8.87576	10.1352	8.97059	9.22265	9.52293	8.69907	8.87305	29810
YGL020C	GET1	Subunit of the GET complex; involved in insertion of proteins into the ER membrane; required for the retrieval of HDEL proteins from the Golgi to the ER in an ERD2 dependent fashion and for normal mitochondrial morphology and inheritance	9	9	10	7.06934	11.5047	8.1417	9.18406	7.27138	10.9767	9.64752	8.09324	8.68887	10.3483	23579.6	6.96346	12.0478	8.45131	9.20876	7.17983	10.6681	10.1018	8.3275	8.74637	9.19267	36384.3	7.08978	12.2132	8.58017	9.16126	7.34189	10.278	9.68316	8.53851	8.7111	9.30894	37125.6
YER008C	SEC3	Subunit of the exocyst complex (Sec3p, Sec5p, Sec6p, Sec8p, Sec10p, Sec15p, Exo70p, Exo84p) which mediates targeting of post-Golgi vesicles to sites of active exocytosis; Sec3p specifically is a spatial landmark for secretion	19	24	22	8.12274	9.00897	9.11788	9.02089	8.73142	9.93729	9.28491	8.68286	9.25635	9.75898	29958	8.16158	8.6878	9.22191	9.40923	8.1665	9.4993	8.80952	8.53511	9.72128	10.6933	28664.3	7.42479	8.57949	8.57079	9.90503	8.70154	9.84981	9.21535	9.00032	9.53784	10.1148	45414.5
YOR085W	OST3	Gamma subunit of the oligosaccharyltransferase complex of the ER lumen, which catalyzes asparagine-linked glycosylation of newly synthesized proteins; Ost3p is important for N-glycosylation of a subset of proteins	7	8	10	6.88728	11.4609	8.93746	8.60509	8.13578	9.5311	10.3904	8.41028	8.94414	9.60711	25118.2	6.72871	11.7757	8.76073	9.13535	7.9847	9.76219	9.5278	8.58149	8.87624	9.7623	26627.3	6.79232	11.549	9.32709	9.52108	7.63051	9.53629	9.4888	8.5752	8.6308	9.84934	43659.7
YMR061W	RNA14	Cleavage and polyadenylation factor I (CF I) component; involved in cleavage and polyadenylation of mRNA 3' ends; bridges interaction between Rna15p and Hrp1p in the CF I complex; mutant displays reduced transcription elongation in the G-less-based run-on (GLRO) assay; required for gene looping	10	11	12	6.95192	8.72375	7.30164	8.3207	7.31355	11.7605	8.71158	9.33367	10.0866	12.4687	17475	6.4588	8.91162	7.10952	8.33268	6.88686	11.9836	8.22356	10.7865	9.78603	12.4267	10004.7	6.04785	8.39833	7.31551	8.26394	6.7755	12.2165	8.71659	10.308	10.1677	12.7087	17764.1
YOR299W	BUD7	Member of the ChAPs family of proteins (Chs5p-Arf1p-binding proteins: Bch1p, Bch2p, Bud7p, Chs6p), that forms the exomer complex with Chs5p to mediate export of specific cargo proteins, including Chs3p, from the Golgi to the plasma membrane	3	6	3	7.77084	8.55343	9.55223	9.4731	7.8755	9.87552	9.99353	8.71877	9.48201	9.62524	2948.59	7.99472	7.83767	9.25787	9.92668	7.86589	10.2236	9.17505	9.49166	9.2882	9.82835	12467.5	6.65424	7.94006	9.72675	8.63483	8.07807	10.8233	11.3303	8.7701	8.76406	10.1994	3191.95
YAL003W	EFB1	Translation elongation factor 1 beta; stimulates nucleotide exchange to regenerate EF-1 alpha-GTP for the next elongation cycle; part of the EF-1 complex, which facilitates binding of aminoacyl-tRNA to the ribosomal A site	47	61	62	10.8976	11.7814	7.40082	8.22386	9.44086	9.89635	8.24336	9.31746	8.61819	7.0781	65759.4	10.8484	11.9331	7.24693	8.31052	9.62894	10.2507	7.85413	9.21704	8.52404	7.08702	96474.2	11.0267	11.655	7.43412	8.31223	9.54034	9.91214	8.00727	9.01489	8.83068	7.18789	116507
YGL106W	MLC1	Essential light chain for Myo1p, light chain for Myo2p; stabilizes Myo2p by binding to the neck region; interacts with Myo1p, Iqg1p, and Myo2p to coordinate formation and contraction of the actomyosin ring with targeted membrane deposition	12	15	19	10.2954	12.9286	8.66896	7.93964	8.76463	9.05194	8.04065	8.74186	8.10341	8.35869	40639.1	10.1974	12.8456	8.80305	7.75255	8.95015	8.99375	7.99027	8.96994	8.26382	8.15674	66538.4	10.0256	13.4986	8.68177	7.7054	8.56567	9.22664	7.71347	8.94558	8.03512	8.52406	65073.4
YGL195W	GCN1	Positive regulator of the Gcn2p kinase activity, forms a complex with Gcn20p; proposed to stimulate Gcn2p activation by an uncharged tRNA	115	145	137	7.50547	5.49242	9.39776	9.02939	9.13598	10.788	9.91117	9.52467	9.93439	10.2264	212092	7.63934	5.39281	9.62869	8.94919	8.84917	10.6191	10.3133	9.22567	10.153	10.1281	342410	7.55008	5.48076	9.45907	8.8347	8.97414	10.7308	10.1535	9.55572	9.99555	10.1876	348487
YCL050C	APA1	Diadenosine 5',5''-P1,P4-tetraphosphate phosphorylase I (AP4A phosphorylase), involved in catabolism of bis(5'-nucleosidyl) tetraphosphates; has similarity to Apa2p	33	44	36	9.42632	11.828	9.08874	9.35901	8.17963	8.86388	9.44469	8.62543	8.6302	7.43706	76789.8	9.289	11.9542	9.16247	9.40009	8.42193	9.15276	8.98491	8.79174	8.3882	7.34834	104286	9.51575	11.7129	9.26223	9.51877	8.20298	8.8373	9.10707	8.56996	8.67315	7.50083	103519
YNL141W	AAH1	Adenine deaminase (adenine aminohydrolase), converts adenine to hypoxanthine; involved in purine salvage; transcriptionally regulated by nutrient levels and growth phase; Aah1p degraded upon entry into quiescence via SCF and the proteasome	15	23	17	9.87336	10.5098	7.67891	6.37229	11.5024	9.63588	8.55232	9.21215	8.91998	8.66072	60436.5	9.97692	11.2036	7.48894	6.176	11.1967	10.2697	8.00584	9.39767	8.44876	8.76713	74417.4	9.34448	11.0551	7.85608	6.44058	10.7489	9.99475	8.40003	9.44279	8.52018	9.14638	83339.1
YOR176W	HEM15	Ferrochelatase, a mitochondrial inner membrane protein, catalyzes the insertion of ferrous iron into protoporphyrin IX, the eighth and final step in the heme biosynthetic pathway	11	16	16	10.0217	10.147	10.5232	8.60499	10.1238	7.03183	9.94854	9.34321	8.43284	6.6873	16028	9.38582	10.0619	10.4833	9.32165	10.2029	6.76952	9.75612	9.51754	8.52664	6.88827	28879.9	9.77255	9.89677	10.2035	9.31909	9.96889	6.94433	9.78513	9.60501	8.67574	6.73807	38100.6
YGL055W	OLE1	Delta(9) fatty acid desaturase, required for monounsaturated fatty acid synthesis and for normal distribution of mitochondria	15	19	19	7.40835	11.2463	9.1062	8.71427	8.62659	10.2512	10.0379	8.35017	8.15021	9.01498	39599.8	7.65534	10.9672	9.43211	8.47441	8.78118	9.81595	10.1403	8.07712	8.6101	8.94832	44471.3	7.32519	11.3864	9.57384	8.55576	8.71761	10.0097	9.94081	8.16029	8.22026	9.02989	61267.3
YJL165C	HAL5	Putative protein kinase; overexpression increases sodium and lithium tolerance, whereas gene disruption increases cation and low pH sensitivity and impairs potassium uptake, suggesting a role in regulation of Trk1p and/or Trk2p transporters	7	12	14	8.13737	10.1639	9.15662	8.92615	8.8969	9.63789	9.28337	9.05121	9.01362	8.64092	18347.3	7.84351	10.2819	9.13141	8.87254	9.25572	10.1541	9.2482	8.97827	9.1791	7.93872	31815.8	8.12523	9.70211	8.98529	8.94975	8.85892	9.97891	9.35624	8.90142	9.13113	8.92606	41580.4
YMR203W	TOM40	Component of the TOM (translocase of outer membrane) complex responsible for recognition and initial import steps for all mitochondrially directed proteins; constitutes the core element of the protein conducting pore	14	14	12	8.79468	9.43045	10.1029	9.22946	7.95788	9.08922	10.1032	8.97415	9.38175	7.8335	24537.4	8.95478	9.47482	10.1693	9.13865	7.78404	8.91825	9.50777	9.44231	9.33708	8.17899	22146.9	8.54768	10.0239	9.42592	9.43421	7.75683	9.39978	9.23816	9.33824	9.36108	8.37895	14167.7
YOL027C	MDM38	Mitochondrial protein, forms a complex with Mba1p to facilitate recruitment of mRNA-specific translational activators to ribosomes; roles in protein export and K+/H+ exchange; human ortholog Letm1 implicated in Wolf-Hirschhorn syndrome	26	25	20	9.70713	10.496	9.57706	9.69846	9.13081	8.43587	8.77458	8.64759	8.2582	8.15881	48553	9.4195	10.5114	9.19593	9.62565	9.50358	8.75235	8.23058	8.924	7.98981	8.74844	67740.2	9.56558	10.0628	9.91081	9.70083	9.45248	8.28241	8.53723	8.43852	8.51527	8.43445	62107.9
YIL047C	SYG1	Plasma membrane protein of unknown function; truncation and overexpression suppresses lethality of G-alpha protein deficiency	7	7	13	7.32274	6.52914	9.28115	11.4112	7.06081	9.24357	10.3459	8.85963	9.45766	11.4142	9984.39	7.50164	6.92363	9.82426	10.176	7.33092	8.9713	11.5609	8.56882	9.44581	10.6077	7743.84	8.09247	6.55573	9.02038	10.6057	7.55033	9.16932	10.8482	8.49703	9.78983	10.752	12830.4
YMR131C	RRB1	Essential nuclear protein involved in early steps of ribosome biogenesis; physically interacts with the ribosomal protein Rpl3p	24	28	23	10.5889	8.14591	8.38954	8.48349	8.84295	10.7931	8.71284	8.479	8.78023	9.71482	36585.5	10.1015	7.73704	7.93878	8.82346	8.55242	11.1916	7.96647	8.49778	9.07935	11.0221	44938	10.3487	7.81108	7.9356	8.74338	8.52161	11.0655	8.16459	8.0685	9.37175	10.8773	45210.2
YMR178W	YMR178W	Putative protein of unknown function; green fluorescent protein (GFP)-fusion protein localizes to both the cytoplasm and nucleus and is induced in response to the DNA-damaging agent MMS; YMR178W is not an essential gene	13	10	12	8.64494	10.2502	9.19344	9.48833	9.00518	8.07948	9.64743	8.93983	8.89518	8.74708	53550.8	8.59237	10.0458	9.5021	9.98855	9.37149	8.25701	9.51273	8.45121	8.95035	8.22346	28888.7	8.98491	10.6498	9.2988	9.78975	9.12257	8.05663	9.16047	8.54367	8.81224	8.47752	35878.2
YPL207W	TYW1	Protein required for the synthesis of wybutosine, a modified guanosine found at the 3'-position adjacent to the anticodon of phenylalanine tRNA which supports reading frame maintenance by stabilizing codon-anticodon interactions	22	23	22	7.36917	6.62631	8.44022	9.08197	9.02262	12.8126	9.61529	8.55674	8.63681	10.7942	39354.9	7.71932	6.61121	8.68043	8.98593	9.1827	12.6943	10.1243	8.24522	8.26568	10.3714	50964.6	7.73497	6.49894	8.00594	8.68274	9.13656	13.0993	10.4451	8.18686	8.52216	10.6153	30175.9
YER143W	DDI1	DNA damage-inducible v-SNARE binding protein with a role in suppression of protein secretion; may play a role in S-phase checkpoint control; has ubiquitin-associated (UBA), ubiquitin-like (UBL), and retroviral-like proteinase (RVP) domains	12	13	17	8.67597	9.4474	9.06224	9.73877	9.9247	8.27378	8.6676	8.66265	8.98742	9.46047	9891.78	8.75669	10.458	8.59949	9.70113	10.412	8.88555	8.78207	8.61038	8.39446	8.29104	18069.7	8.78292	10.6076	8.38173	9.552	9.96967	8.92098	9.24534	8.93253	8.42806	8.08674	29461.6
YDR001C	NTH1	Neutral trehalase, degrades trehalose; required for thermotolerance and may mediate resistance to other cellular stresses; may be phosphorylated by Cdc28p	24	28	24	7.23952	6.85725	11.0886	10.9762	10.6049	6.97343	9.22805	9.07389	10.106	8.74288	43314.8	7.20077	6.68393	11.4937	11.7263	10.1008	6.72146	8.81552	9.13543	9.88338	9.11637	49986.4	7.3317	7.07506	11.6781	11.6333	10.0233	6.49168	9.25533	8.96012	9.66327	8.76767	51613.3
YBR001C	NTH2	Putative neutral trehalase, required for thermotolerance and may mediate resistance to other cellular stresses	2	1	5	8.06083	6.17826	9.73478	10.7647	9.79263	7.24847	10.3371	10.9767	9.68582	8.11129	1892.04	6.5896	6.16198	10.5963	10.5952	9.49764	8.61205	10.3588	9.91476	9.86447	8.68734	595.036	6.01953	6.25302	9.49232	10.9255	10.415	8.90852	9.14606	9.67329	10.7008	9.36424	6129.16
YKR079C	TRZ1	tRNA 3'-end processing endonuclease tRNase Z; also localized to mitochondria and interacts genetically with Rex2 exonuclease; homolog of the human candidate prostate cancer susceptibility gene ELAC2	11	11	9	8.11184	9.05605	7.9588	9.03907	7.39093	11.5833	9.98946	8.44413	8.20743	11.1588	16418.7	8.49693	9.15282	8.50304	9.22575	7.40423	10.9598	9.6953	8.55284	8.22811	10.6869	15815.9	8.01694	9.14702	8.74625	9.6943	7.5515	11.2187	8.93113	8.57964	8.13616	10.8795	11427.9
YPL239W	YAR1	Cytoplasmic ankyrin-repeat containing protein of unknown function, proposed to link the processes of 40S ribosomal subunit biogenesis and adaptation to osmotic and oxidative stress; expression repressed by heat shock	20	19	18	9.95009	13.0365	8.07869	8.7241	8.2789	11.2603	7.86499	8.03329	6.99871	8.67919	50475.4	9.79144	12.9242	8.01094	8.616	8.53568	10.8227	8.12533	8.39525	7.18811	8.48823	46207.4	9.68724	13.1869	8.50322	9.04771	8.38462	10.4147	7.65703	8.46806	7.01733	8.54363	47451.9
YHL032C	GUT1	Glycerol kinase, converts glycerol to glycerol-3-phosphate; glucose repression of expression is mediated by Adr1p and Ino2p-Ino4p; derepression of expression on non-fermentable carbon sources is mediated by Opi1p and Rsf1p	0	1	1	0	0	0	0	0	0	0	0	0	0	0	8.75918	12.5339	8.36497	9.62811	8.43822	9.45931	8.64386	8.00436	8.27841	8.78295	817.931	7.25647	6.73773	8.1123	9.13979	9.99671	8.56468	9.80917	9.81149	9.3813	12.0958	7857
YMR302C	YME2	Integral inner mitochondrial membrane protein with a role in maintaining mitochondrial nucleoid structure and number; mutants exhibit an increased rate of mitochondrial DNA escape; shows some sequence similarity to exonucleases	20	19	20	7.43467	7.97446	9.50517	9.61466	9.21596	8.71367	9.74024	9.60722	9.41182	9.69502	24702	7.75867	7.04334	9.2274	9.87447	8.91406	8.59174	10.6837	10.0564	9.24084	9.51793	29926.3	7.9104	7.02939	9.81227	9.75918	8.82367	8.31515	10.1318	9.86179	9.39323	9.86386	36643.5
YIL155C	GUT2	Mitochondrial glycerol-3-phosphate dehydrogenase; expression is repressed by both glucose and cAMP and derepressed by non-fermentable carbon sources in a Snf1p, Rsf1p, Hap2/3/4/5 complex dependent manner	14	20	17	6.35205	9.57626	8.45053	9.66028	9.63012	7.88211	11.3834	10.1655	9.48297	8.30779	37546.6	6.46184	9.7763	8.24473	9.92432	8.89299	8.19748	11.2384	10.3585	9.36218	8.44261	34088.6	6.58494	9.73077	8.31496	9.95635	9.09906	8.21829	10.8362	10.5009	8.98306	8.67796	36093.1
YJL068C	YJL068C	Non-essential intracellular esterase that can function as an S-formylglutathione hydrolase; may be involved in the detoxification of formaldehyde, which can be metabolized to S-formylglutathione; similar to human esterase D	9	12	9	8.61572	10.2432	9.23327	8.94713	11.8151	5.64755	9.66733	10.0452	9.46476	7.18564	12164.1	8.22572	10.1292	9.1446	9.65423	11.5513	5.31464	10.5226	10.4966	8.70444	7.17966	28448.2	9.34672	9.561	9.21168	8.49951	11.5398	5.49542	10.7502	9.97575	9.75998	6.77733	14198.8
YBR101C	FES1	Hsp70 (Ssa1p) nucleotide exchange factor, cytosolic homolog of Sil1p, which is the nucleotide exchange factor for BiP (Kar2p) in the endoplasmic reticulum	11	11	7	9.14811	10.1625	9.01247	10.0095	9.45561	8.93351	8.51385	8.24802	8.38527	9.02751	16461	9.77144	9.87124	9.57125	9.43362	9.99721	8.64096	8.32299	7.54034	8.85347	8.89956	17137	8.68983	9.53572	8.63391	9.60839	9.30611	8.83586	7.91631	7.96631	11.6565	8.7485	27944.9
YLL058W	YLL058W	Putative protein of unknown function with similarity to Str2p, which is a cystathionine gamma-synthase important in sulfur metabolism; YLL058W is not an essential gene	6	6	6	9.11734	8.35283	10.0102	9.72192	9.58609	8.92198	9.58359	6.8652	9.29682	9.44876	13316.3	9.37338	10.9481	9.36695	9.06967	9.55653	8.8376	9.86674	6.56694	8.76176	8.55826	11371.7	7.64626	7.33462	7.23378	8.98592	8.53926	8.31687	10.6247	8.96575	10.5893	12.656	10458.9
YMR128W	ECM16	Essential DEAH-box ATP-dependent RNA helicase specific to the U3 snoRNP, predominantly nucleolar in distribution, required for 18S rRNA synthesis	26	40	37	6.80952	8.68676	6.85866	8.78625	7.9316	12.155	8.66298	8.04207	10.1472	12.8962	48850.5	7.09407	8.97242	7.05944	8.77547	7.99402	11.8605	8.39267	7.96149	9.82201	12.9692	88464.2	7.06198	8.81759	7.28886	8.82157	8.13177	11.7119	8.48327	7.92455	9.70715	12.9573	72182.6
YCR012W	PGK1	3-phosphoglycerate kinase, catalyzes transfer of high-energy phosphoryl groups from the acyl phosphate of 1,3-bisphosphoglycerate to ADP to produce ATP; key enzyme in glycolysis and gluconeogenesis	247	298	252	10.6666	6.59098	9.53925	9.18549	11.4874	7.21288	8.53101	9.69549	9.38034	8.60744	489721	10.5139	6.37409	9.27926	9.81514	11.3579	7.29902	8.33062	9.73582	9.36127	8.85023	583305	10.4563	6.77452	9.23837	9.63407	11.2812	7.33904	8.39306	9.72007	9.1922	8.87562	544081
YKL216W	URA1	Dihydroorotate dehydrogenase, catalyzes the fourth enzymatic step in the de novo biosynthesis of pyrimidines, converting dihydroorotic acid into orotic acid	21	20	21	12.1408	14.139	8.41621	12.151	10.6486	5.13952	10.0198	7.27515	5.87399	4.98965	86925.1	11.355	13.2092	9.07834	9.9124	11.7185	5.06381	12.1722	7.20889	6.23701	4.97448	68965.6	12.094	12.9938	8.35781	11.5174	11.0729	5.10432	11.6825	6.91744	6.32833	4.80063	68795
YGL026C	TRP5	Tryptophan synthase, catalyzes the last step of tryptophan biosynthesis; regulated by the general control system of amino acid biosynthesis	54	65	51	10.8253	7.42595	9.30813	8.81481	10.021	7.90096	10.2015	9.38288	8.96913	8.04217	140514	10.7907	7.50824	9.30217	9.50141	9.7197	8.07151	9.38642	9.21923	8.99259	8.42863	146462	10.9272	7.52218	9.22875	9.27399	9.8248	7.89563	9.63481	9.42612	8.98396	8.18817	124081
YJL121C	RPE1	D-ribulose-5-phosphate 3-epimerase, catalyzes a reaction in the non-oxidative part of the pentose-phosphate pathway; mutants are sensitive to oxidative stress	13	10	12	9.69773	12.3583	7.28789	8.54984	8.67874	8.90374	10.0142	9.62135	8.71039	7.06307	24785.6	9.70951	12.9	7.49461	8.15556	8.39921	8.63438	10.2287	9.44094	8.72831	7.23493	25369	10.2143	12.5694	7.85948	7.51963	8.77538	8.57683	9.66299	9.462	8.92557	7.35869	21496.8
YHR183W	GND1	6-phosphogluconate dehydrogenase (decarboxylating), catalyzes an NADPH regenerating reaction in the pentose phosphate pathway; required for growth on D-glucono-delta-lactone and adaptation to oxidative stress	52	63	56	8.75189	9.2276	10.8746	9.41874	10.1847	6.57198	10.2181	8.62164	8.93128	8.07108	124570	8.77133	9.39715	10.5775	9.55138	10.2424	6.65918	10.0329	8.74487	8.90587	8.0327	171125	8.65358	9.07849	10.5204	9.222	10.1077	6.66917	10.0448	8.53682	9.90246	8.169	135068
YPR034W	ARP7	Component of both the SWI/SNF and RSC chromatin remodeling complexes; actin-related protein involved in transcriptional regulation	15	13	20	9.12528	9.49869	8.12935	8.41121	8.19191	10.258	9.39962	9.7879	9.08435	9.03591	29657.5	9.06162	9.40258	8.33182	8.63272	8.16494	10.3662	8.76393	9.7336	9.37895	9.06866	24519.6	8.98214	9.30974	8.68394	8.77119	8.40446	10.1507	8.65064	9.73965	9.05807	9.16548	33206.8
YPR033C	HTS1	Cytoplasmic and mitochondrial histidine tRNA synthetase; efficient mitochondrial localization requires both a presequence and an amino-terminal sequence; mutations in human ortholog HARS2 are associated with Perrault syndrome	32	48	42	10.2033	9.78829	8.5044	10.0471	8.31619	9.79747	7.96697	8.08436	8.97605	9.22734	53178.3	9.22405	10.3871	8.07899	9.4584	8.82757	9.46127	9.74445	9.57616	8.27077	7.87155	90685.6	9.80683	9.98348	8.4756	9.60306	8.80745	8.54009	9.21701	8.76459	9.45138	8.24791	106925
YIL142W	CCT2	Subunit beta of the cytosolic chaperonin Cct ring complex, related to Tcp1p, required for the assembly of actin and tubulins in vivo	38	47	43	11.042	8.19282	10.0933	8.6949	8.82756	9.24562	9.18113	8.39703	8.96449	8.26472	98231.5	10.8948	8.52442	10.0688	9.07394	8.4698	9.72158	8.83646	8.57932	8.66302	8.07355	89892.9	10.2285	8.80328	9.54637	9.16583	8.66977	9.94469	8.66146	8.74978	8.63946	8.50143	94207.8
YOR196C	LIP5	Protein involved in biosynthesis of the coenzyme lipoic acid, has similarity to E. coli lipoic acid synthase	14	11	11	8.98885	9.72017	8.55665	8.726	8.89675	9.09054	9.12428	10.08	9.01557	8.70929	18248.5	9.72816	9.88957	8.18884	8.27831	8.94926	9.09976	9.53071	9.62464	9.03051	8.6054	28426.1	9.56141	9.50041	8.87165	8.53811	8.5074	8.82211	9.13426	9.83276	9.12908	9.0158	23502.7
YPL254W	HFI1	Adaptor protein required for structural integrity of the SAGA complex, a histone acetyltransferase-coactivator complex that is involved in global regulation of gene expression through acetylation and transcription functions	2	2	5	9.51823	7.53369	11.5128	8.72809	9.86094	8.30531	7.8522	8.43944	9.3602	9.8016	3038.78	7.29141	8.13053	7.9892	8.50503	9.28205	10.3762	7.91734	9.74628	9.94285	11.7271	1201.02	8.64233	7.38659	8.39533	11.7566	9.82594	8.72473	7.84738	9.32562	9.47424	9.49875	7022.13
YBR103W	SIF2	WD40 repeat-containing subunit of the Set3C histone deacetylase complex, which represses early/middle sporulation genes; antagonizes telomeric silencing; binds specifically to the Sir4p N-terminus	10	9	12	9.65087	9.25622	8.4966	8.62625	9.85945	9.70824	8.07629	10.1316	8.12774	8.9794	11344.6	9.67235	9.38361	8.67865	8.58106	9.71976	9.63831	8.69033	8.91762	8.82366	8.80367	17101.4	9.47749	9.05383	8.24202	8.69689	9.84048	10.2345	8.42583	9.21571	8.71074	9.02302	24895.1
YDR097C	MSH6	Protein required for mismatch repair in mitosis and meiosis, forms a complex with Msh2p to repair both single-base & insertion-deletion mispairs; potentially phosphorylated by Cdc28p	17	14	15	5.9705	6.00793	8.78754	8.78794	8.24209	9.60527	8.12934	8.65782	11.9361	14.8628	18691.5	6.60429	6.35198	8.49929	8.28183	8.54691	9.82919	8.07803	8.89879	11.4497	14.3895	20977.1	6.49232	5.92381	8.6448	8.22271	8.56374	9.75752	8.15334	8.54624	12.0598	14.5419	25780.8
YCR053W	THR4	Threonine synthase, conserved protein that catalyzes formation of threonine from O-phosphohomoserine; expression is regulated by the GCN4-mediated general amino acid control pathway	52	58	61	10.8904	11.3893	9.14961	9.20681	8.37371	8.43177	9.06873	8.81501	8.15818	7.39427	123044	10.3754	11.8276	8.56388	9.21023	8.6385	8.43529	9.3996	8.78121	8.03568	7.6486	137516	10.9167	11.4822	8.61587	9.32335	8.28818	8.50381	9.26817	8.65782	8.43723	7.40588	147278
YJL080C	SCP160	Essential RNA-binding G protein effector of mating response pathway, mainly associated with nuclear envelope and ER, interacts in mRNA-dependent manner with translating ribosomes via multiple KH domains, similar to vertebrate vigilins	93	112	113	11.6367	7.92678	9.97426	8.50093	9.07365	8.0833	9.3981	9.21367	8.69709	8.39043	260734	11.508	7.85869	9.80719	8.49046	9.39456	8.057	9.53778	9.24045	8.71576	8.32877	283421	11.5539	7.94062	9.74932	8.55543	9.14731	8.21321	9.45002	9.13528	8.81384	8.35274	353798
YNL247W	YNL247W	Cysteinyl-tRNA synthetase; may interact with ribosomes, based on co-purification experiments	51	59	59	10.0634	5.94361	9.22046	9.63043	8.85948	9.31896	10.0387	9.08445	9.19106	9.56751	121965	9.9344	5.84056	9.49708	9.91084	8.86554	9.2504	9.52446	9.45525	9.12713	9.50376	146081	9.96619	5.68992	9.7599	9.91118	8.88638	9.14043	9.73855	9.11284	9.24091	9.45267	178567
YNL010W	YNL010W	Putative protein of unknown function with similarity to phosphoserine phosphatases; green fluorescent protein (GFP)-fusion protein localizes to the cytoplasm and nucleus; homozygous diploid mutant shows an increase in glycogen accumulation	24	25	27	10.3265	10.7323	9.38352	8.42325	9.04669	8.47365	9.56849	8.87451	8.88772	7.16782	85473.4	10.3064	11.0015	9.41791	9.22016	8.29464	9.31272	8.31445	8.46031	8.73568	7.83673	104106	10.3923	11.0443	9.54261	8.90918	8.6157	8.55132	8.76463	8.85724	8.83491	7.39672	120337
YGL012W	ERG4	C-24(28) sterol reductase, catalyzes the final step in ergosterol biosynthesis; mutants are viable, but lack ergosterol	12	8	13	8.34717	8.70433	8.45155	7.44696	9.87628	10.8588	8.63768	9.8287	8.51613	10.2717	31274.9	8.21979	7.92672	8.05616	7.2338	10.3178	10.1705	9.38674	9.6769	9.27746	10.6634	36570.2	8.6085	7.63267	7.52895	7.31268	10.3278	10.2785	9.68259	9.77075	9.52878	10.2662	58678.2
YER125W	RSP5	E3 ubiquitin ligase of the NEDD4 family; involved in regulating many cellular processes including MVB sorting, heat shock response, transcription, endocytosis, and ribosome stability; human homolog is involved in Liddle syndrome; mutant tolerates aneuploidy	43	42	43	9.05641	6.46659	10.514	9.52492	8.86445	9.24002	9.10967	9.25825	9.28815	9.59616	102707	8.71319	6.5069	10.5549	9.41794	8.96921	9.06411	9.89264	8.94395	9.46865	9.37425	118906	8.9035	6.41506	10.0787	9.08508	9.11159	9.06511	10.1525	9.07446	9.73067	9.2949	108119
YFL039C	ACT1	Actin, structural protein involved in cell polarization, endocytosis, and other cytoskeletal functions	111	125	128	8.21884	10.4602	9.81797	8.43829	9.47896	8.35737	9.13385	8.86122	9.48124	8.65217	246990	8.27098	10.6446	9.98874	8.64694	9.19077	8.59578	8.83079	9.07452	9.25817	8.40357	239876	8.06727	10.5373	10.0546	8.49948	9.42451	8.50289	8.89942	8.95684	9.40632	8.57008	250277
YCR054C	CTR86	Essential protein of unknown function; with orthologs in Ashbya gossypii and Candida albicans; similar to human ATXN10, mutations in which cause spinocerebellar ataxia type 10; codon usage corresponds to that observed for yeast genes expressed at low levels	11	14	11	7.98606	9.98614	7.99613	8.70486	8.8752	10.5024	9.01194	8.68966	9.60443	9.57208	16615.3	7.76978	11.0505	7.96099	9.32663	8.7917	10.6402	8.57011	8.77923	8.38293	9.6143	23835.8	7.93948	10.3601	8.47714	9.38232	8.80658	10.4561	8.83005	8.77632	8.76248	9.11961	20350.4
YPL020C	ULP1	Protease that specifically cleaves Smt3p protein conjugates; required for cell cycle progression; associates with nucleoporins and may interact with septin rings during telophase; sequestered to the nucleolus under stress conditions	8	8	9	7.67782	8.55337	9.2173	9.73889	9.03017	9.82722	9.23836	8.55694	9.15991	9.92017	9951.64	8.15766	8.87426	8.73942	9.72652	8.89731	10.5322	8.90475	8.53952	8.91286	9.59921	12267.8	7.65634	7.95802	8.24518	10.018	8.05197	12.451	7.25402	8.26168	9.32228	11.6823	12429.5
YOR252W	TMA16	Protein of unknown function that associates with ribosomes	10	13	12	9.51878	13.1925	6.06181	8.86932	7.05057	15.4741	4.23759	7.1793	8.37034	11.0218	28605.3	8.99521	13.6179	6.29001	8.34746	8.02435	14.4373	6.19929	7.77746	7.76193	9.4089	31521.1	9.03754	13.4361	6.29732	9.14211	7.51037	14.1067	5.69733	7.69279	7.89825	10.0933	28414.3
YFR024C-A	LSB3	Protein containing a C-terminal SH3 domain; binds Las17p, which is a homolog of human Wiskott-Aldrich Syndrome protein involved in actin patch assembly and actin polymerization	10	13	13	9.06697	7.79467	9.89902	9.75702	10.0764	7.75636	9.5584	9.11804	9.35562	8.51076	13436.8	9.15584	8.43359	9.78817	9.05	9.92166	7.62516	9.96087	9.35536	9.01724	8.61454	24820	10.0601	8.25135	9.0813	8.38951	10.4257	7.7102	10.5814	9.14136	9.40948	7.86799	21142.4
YHR016C	YSC84	Actin-binding protein involved in bundling of actin filaments and endocytosis of actin cortical patches; activity stimulated by Las17p; contains SH3 domain similar to Rvs167p	4	6	3	6.88175	7.71281	10.7952	12.2647	10.3461	6.48284	8.83943	9.21979	9.47105	8.86455	4833.08	7.91878	9.16635	12.6897	8.58008	11.7914	5.99874	11.3094	8.78204	7.16172	7.52712	10972.6	9.58413	8.1649	9.87824	8.87736	10.9178	6.70053	11.4754	8.77413	9.27889	7.26177	3971.86
YJR035W	RAD26	Protein involved in transcription-coupled nucleotide excision repair of UV-induced DNA lesions; recruitment to DNA lesions is dependent on an elongating RNA polymerase II; homolog of human CSB protein	0	3	2	0	0	0	0	0	0	0	0	0	0	0	5.67176	8.66286	8.20897	8.97679	8.29279	9.98627	9.4868	8.8141	10.6995	12.104	2206.62	6.41889	8.49371	7.18836	9.2784	9.19169	9.95354	8.85399	8.87951	10.1598	12.4833	2727.79
YKL038W	RGT1	Glucose-responsive transcription factor that regulates expression of several glucose transporter (HXT) genes in response to glucose; binds to promoters and acts both as a transcriptional activator and repressor	0	0	2	0	0	0	0	0	0	0	0	0	0	0	7.33505	8.83745	8.27533	10.3858	7.3843	8.37597	8.27837	8.56464	10.2504	13.2315	0	0	0	0	0	0	0	0	0	0	0	1390.25
YDR334W	SWR1	Swi2/Snf2-related ATPase that is the structural component of the SWR1 complex, which exchanges histone variant H2AZ (Htz1p) for chromatin-bound histone H2A	1	2	4	6.61471	7.48517	7.4122	8.19066	8.90821	11.2699	8.76909	8.89388	11.0236	12.4086	2305.85	6.45915	7.06182	7.61607	7.48193	9.07876	11.3817	8.39289	8.49881	11.5705	13.3742	2708.85	6.61049	7.43855	6.45319	6.75292	8.7046	12.3115	8.26756	9.28024	11.4433	13.6735	4655.98
YDR280W	RRP45	Exosome non-catalytic core component; involved in 3'-5' RNA processing and degradation in both the nucleus and the cytoplasm; has similarity to E. coli RNase PH and to human hRrp45p (PM/SCL-75, EXOSC9)	10	11	15	9.75763	9.92649	8.42277	8.63089	8.65658	10.769	8.60209	8.38218	8.66943	9.10392	31667.9	9.2779	9.98346	7.8605	8.68659	8.74217	11.3752	8.83321	8.60208	8.4924	9.04061	29632.7	9.44262	10.0438	8.41278	8.82477	8.59632	10.7862	8.69382	8.52845	8.54193	9.044	40957.9
YGL059W	PKP2	Mitochondrial protein kinase that negatively regulates activity of the pyruvate dehydrogenase complex by phosphorylating the ser-133 residue of the Pda1p subunit; acts in concert with kinase Pkp1p and phosphatases Ptc5p and Ptc6p	1	2	1	7.51464	9.06954	9.49918	7.86892	12.5054	8.99059	8.5439	8.97958	9.71954	8.21888	1978.36	7.40053	10.4876	8.3465	9.05722	10.7008	10.2189	8.97595	8.50491	8.46871	8.71894	812.318	7.55061	13.2411	8.12699	7.40969	11.2911	10.4776	9.48516	7.88268	8.08438	7.39632	549.182
YDL135C	RDI1	Rho GDP dissociation inhibitor involved in the localization and regulation of Cdc42p and Rho1p	8	10	10	10.3281	12.104	9.66916	8.5498	8.16327	7.36941	9.75299	8.65864	8.36974	7.90743	21241.7	10.2614	13.1242	10.0918	8.87088	8.43083	7.51519	7.78991	8.26544	8.49637	8.07357	23615.1	9.9722	13.4105	10.2412	9.01539	8.26087	7.12961	7.80862	8.25765	8.5549	8.24598	27516.8
YLR182W	SWI6	Transcription cofactor, forms complexes with Swi4p and Mbp1p to regulate transcription at the G1/S transition; involved in meiotic gene expression; cell wall stress induces phosphorylation by Mpk1p, which regulates Swi6p localization	11	19	14	8.36217	7.99821	8.37735	9.09431	8.6123	10.0158	9.30922	9.09549	9.51643	10.553	21404.8	8.67947	8.14607	8.27909	8.99132	8.55896	10.2639	8.80512	8.97656	9.70653	10.5002	27504.2	8.32389	8.08097	8.41434	8.90739	8.4944	10.4306	8.82337	8.93333	9.48368	11.0173	36069.8
YJL217W	REE1	Cytoplasmic protein involved in the regulation of enolase (ENO1); mRNA expression is induced by calcium shortage, copper deficiency (via Mac1p) and the presence of galactose (via Gal4p); mRNA expression is also regulated by the cell cycle	7	13	15	8.79379	24.2419	9.49667	7.49253	8.39665	9.65524	8.53346	4.78011	5.31509	4.11001	11088.5	9.23619	23.1939	8.64499	8.2395	8.43698	10.4667	7.84084	4.68101	5.82073	4.29865	34083.8	9.39296	25.5531	8.73359	6.94944	8.77365	9.54903	8.53756	4.70621	5.25058	3.4875	39032.9
YOL090W	MSH2	Protein that forms heterodimers with Msh3p and Msh6p that bind to DNA mismatches to initiate the mismatch repair process; contains a Walker ATP-binding motif required for repair activity; Msh2p-Msh6p binds to and hydrolyzes ATP	12	21	18	6.24777	4.9037	8.23196	8.60246	7.79573	10.4489	8.25045	8.8641	11.8801	15.7801	25523.7	7.20416	5.8673	8.49404	8.46319	8.17869	9.51752	8.66834	8.87491	10.9176	14.7562	50863.3	6.03046	4.97799	8.01227	8.8626	7.79987	10.198	8.11165	8.79246	11.6424	16.4654	49501.3
YPR019W	MCM4	Essential helicase component of heterohexameric MCM2-7 complexes which bind pre-replication complexes on DNA and melt DNA prior to replication; forms an Mcm4p-6p-7p subcomplex; shows nuclear accumulation in G1; homolog of S. pombe Cdc21p	38	36	34	8.79318	8.73056	7.98842	9.33861	9.34146	9.69783	9.65647	8.68472	8.99017	9.69612	54923.1	9.20948	8.64022	8.42094	9.17579	9.36531	9.56863	9.60436	8.58289	9.054	9.2859	63953.5	8.86465	8.80792	8.21936	9.28335	9.24471	9.5716	9.22521	8.97753	8.92558	9.78634	72210.3
YGL201C	MCM6	Protein involved in DNA replication; component of the Mcm2-7 hexameric complex that binds chromatin as a part of the pre-replicative complex; forms a subcomplex with Mcm4p and Mcm7p	29	30	29	7.98808	7.4923	8.16132	8.60917	9.07202	10.4697	9.14032	9.0397	9.68525	11.2904	44457.1	8.2672	7.25678	8.07528	8.15632	9.41236	10.1512	9.83777	8.84794	10.0802	10.8357	52916.8	8.1023	7.78487	7.57295	8.33925	8.69868	11.0166	9.4667	9.05596	9.575	11.3056	60211.3
YPL013C	MRPS16	Mitochondrial ribosomal protein of the small subunit	1	4	4	7.4802	15.3191	7.07759	7.96087	7.90439	8.92579	9.96929	9.56565	8.60904	8.07718	6878.09	8.02213	15.0327	8.89798	7.82671	7.94297	10.2047	8.80797	8.5176	8.26559	7.37602	3934.77	8.56735	13.3484	9.39037	8.43805	7.82763	9.71054	8.49713	9.08869	8.32895	7.72172	11233.2
YBR202W	MCM7	Component of the heterohexameric MCM2-7 complex, which primes origins of DNA replication in G1 and becomes an active ATP-dependent helicase that promotes DNA melting and elongation in S-phase; forms an Mcm4p-6p-7p subcomplex	16	15	17	7.21897	10.004	8.28644	9.24434	7.32034	10.0669	9.32715	8.68046	9.69924	11.0872	18657.4	7.3192	9.65592	7.90838	9.43396	6.84123	10.3632	8.85265	8.88526	9.76605	11.881	19415.9	6.89569	10.2388	8.03271	8.59995	7.4051	10.3431	10.0849	9.29895	9.21811	10.7936	25972.9
YNL157W	IGO1	Protein required for initiation of G0 program; prevents degradation of nutrient-regulated mRNAs via the 5'-3' mRNA decay pathway; phosphorylated by Rim15p; GFP protein localizes to the cytoplasm and nucleus; similar to Igo2p	6	11	8	9.28857	13.8854	9.87581	8.81493	9.27962	8.05693	8.28593	8.17169	7.90809	7.30079	8622.77	8.98465	14.3439	9.46051	9.48052	8.83991	8.01322	7.48852	8.35337	7.78244	8.15179	16713	9.13237	14.1708	10.3589	9.37281	8.68925	7.48093	7.53804	8.29802	8.31604	7.54242	18404.2
YLR274W	MCM5	Component of the hexameric MCM complex, which is important for priming origins of DNA replication in G1 and becomes an active ATP-dependent helicase that promotes DNA melting and elongation when activated by Cdc7p-Dbf4p in S-phase	17	21	24	7.86591	8.02486	8.39016	9.25001	8.02428	10.597	9.02958	8.99528	9.41032	11.3574	24970.6	8.43214	7.5732	8.25937	9.06624	7.94363	10.6079	9.06896	8.96501	9.65053	11.3438	26969.3	8.11038	8.16832	8.28565	8.94617	8.09274	10.6215	9.32225	8.74527	9.48962	11.1255	28754.2
YBL023C	MCM2	Protein involved in DNA replication; component of the Mcm2-7 hexameric complex that binds chromatin as a part of the pre-replicative complex	21	21	19	8.18314	7.25023	8.56612	8.63118	9.33115	10.946	9.2484	8.64306	9.79253	10.353	30938.7	8.18361	7.33058	8.37971	8.88848	9.06929	11.457	8.89424	8.78894	9.24492	10.6571	25608.3	8.36643	8.07101	8.71863	8.59662	8.6884	10.7538	9.01883	9.0921	9.29315	10.3195	30228.3
YNR050C	LYS9	Saccharopine dehydrogenase (NADP+, L-glutamate-forming); catalyzes the formation of saccharopine from alpha-aminoadipate 6-semialdehyde, the seventh step in lysine biosynthesis pathway; exhibits genetic and physical interactions with TRM112	30	36	28	10.9657	11.5782	9.91982	8.26614	8.45193	6.69052	9.20323	8.63048	8.57307	8.59701	65558.9	11.281	11.7656	10.1819	8.26666	8.06321	6.72409	9.00593	8.58457	8.55834	8.52166	78036.6	11.028	12.2152	9.67292	8.35762	8.1754	6.9449	8.80091	8.81823	8.14649	8.7421	58169.7
YBR025C	OLA1	P-loop ATPase with similarity to human OLA1 and bacterial YchF; identified as specifically interacting with the proteasome; protein levels are induced by hydrogen peroxide	51	61	58	10.7449	9.27419	9.11907	8.36317	9.28435	8.28823	8.93509	8.7501	9.09066	9.05334	122804	11.1781	9.99499	8.92879	8.12778	9.2123	8.39646	8.78903	8.83415	8.67394	8.80295	143374	10.9214	9.66445	9.29619	8.30905	9.22422	8.19668	8.70491	8.85032	8.72292	9.02152	169852
YGR090W	UTP22	Possible U3 snoRNP protein involved in maturation of pre-18S rRNA, based on computational analysis of large-scale protein-protein interaction data	34	29	25	6.1875	8.21647	7.15354	8.16556	7.53811	10.3338	8.59061	8.64706	10.6543	15.5013	43738.8	6.39051	8.40118	7.1898	8.01573	7.97779	9.85849	8.77911	8.61432	11.1436	14.5687	47507.2	5.95999	8.10299	7.32459	7.96513	7.31815	10.4557	8.86385	8.26813	10.5398	16.1027	35515.6
YPL237W	SUI3	Beta subunit of the translation initiation factor eIF2, involved in the identification of the start codon; proposed to be involved in mRNA binding	25	25	22	10.8316	12.8656	7.96138	7.84485	8.18667	11.5971	8.05352	7.17674	7.50279	8.8939	76493.5	10.7765	12.9275	8.41295	7.99052	8.66771	10.7713	8.58847	7.28979	7.43362	8.04915	54455	11.4045	12.3724	8.54357	8.0312	8.31929	11.0244	8.24706	7.17455	7.66103	8.14148	32496.3
YDR147W	EKI1	Ethanolamine kinase, primarily responsible for phosphatidylethanolamine synthesis via the CDP-ethanolamine pathway; exhibits some choline kinase activity, thus contributing to phosphatidylcholine synthesis via the CDP-choline pathway	7	5	7	8.16314	9.07739	8.13133	7.92787	9.41499	11.8988	7.98784	9.01281	9.4039	9.93135	11788.7	8.425	9.12122	8.74149	8.64306	9.01225	12.0818	8.00719	9.34033	8.82478	8.67696	8061.46	8.01194	9.55554	8.85207	8.24471	8.95616	12.2909	7.73104	9.31605	9.22856	8.74912	8881.43
YCL054W	SPB1	AdoMet-dependent methyltransferase involved in rRNA processing and 60S ribosomal subunit maturation; methylates G2922 in the tRNA docking site of the large subunit rRNA and in the absence of snR52, U2921; suppressor of PAB1 mutants	22	23	22	9.16048	12.7494	6.91054	8.20768	8.21753	10.3177	9.23948	8.92155	8.77182	8.41326	57775.8	8.69082	12.8366	6.45384	8.62493	8.21881	10.7865	8.72511	8.8731	8.82992	8.85879	57000.6	8.81348	12.1017	7.04389	8.73184	8.1185	10.4404	8.83468	8.87364	8.95731	8.9949	72856.7
YLR117C	CLF1	Member of the NineTeen Complex (NTC) that contains Prp19p and stabilizes U6 snRNA in catalytic forms of the spliceosome containing U2, U5, and U6 snRNAs; homolog of Drosophila crooked neck protein; interacts with U1 snRNP proteins	1	3	6	6.03537	6.58635	8.19315	9.47891	7.60393	10.6887	8.17968	8.95725	10.4591	14.8014	841.845	7.74116	7.10795	7.50489	8.89365	8.81222	10.681	8.1453	8.4259	10.424	13.1778	1424.07	6.71054	7.05308	7.15144	9.52986	8.59309	10.727	8.59602	9.12754	10.7433	12.6673	8847.63
YJL130C	URA2	Bifunctional carbamoylphosphate synthetase (CPSase)-aspartate transcarbamylase (ATCase), catalyzes the first two enzymatic steps in the de novo biosynthesis of pyrimidines; both activities are subject to feedback inhibition by UTP	206	214	197	8.04458	8.44403	8.14765	9.29031	11.4412	7.75456	10.5648	9.45034	8.9595	8.79649	479806	8.34328	8.22151	8.25863	9.30262	11.4379	7.4847	10.8227	9.35169	9.05969	8.63551	491585	8.15866	8.33499	7.9994	9.11561	11.5608	7.71943	11.0044	9.51098	8.89157	8.61899	554674
YJR109C	CPA2	Large subunit of carbamoyl phosphate synthetase, which catalyzes a step in the synthesis of citrulline, an arginine precursor	60	51	56	14.007	8.78296	6.93805	5.87268	14.5494	12.1933	9.17769	7.06114	5.95993	6.35923	128706	13.7026	8.66191	7.08941	6.53971	14.1156	12.561	8.87305	7.05667	5.83208	6.47632	109092	13.5614	8.94862	6.84456	6.05002	14.1244	12.6913	8.77106	7.20987	6.04138	6.73141	138475
YFL008W	SMC1	Subunit of the multiprotein cohesin complex, essential protein involved in chromosome segregation and in double-strand DNA break repair; SMC chromosomal ATPase family member, binds DNA with a preference for DNA with secondary structure	26	38	32	9.10893	10.4533	8.2879	8.83638	8.79782	9.49754	8.54964	8.59871	9.15858	9.62735	49861.6	8.84704	10.4029	7.66711	9.25093	8.66315	10.3508	7.86607	8.93481	8.85811	10.0573	71870	8.98462	10.1354	8.41277	9.26393	8.8967	9.61529	8.00988	8.85739	8.95157	9.77695	43191.3
YOR377W	ATF1	Alcohol acetyltransferase with potential roles in lipid and sterol metabolism; responsible for the major part of volatile acetate ester production during fermentation	10	8	7	9.47175	6.45162	8.37617	7.80836	7.64725	9.39907	8.55399	8.40793	10.3589	14.4979	19850.7	9.58784	6.14163	8.04395	7.73258	7.81046	10.1449	8.6001	7.72803	10.8529	14.3141	16042.6	10.0998	6.08844	8.00746	7.48286	8.53581	9.54836	8.85272	7.90228	10.6878	13.7025	16044.5
YOR347C	PYK2	Pyruvate kinase that appears to be modulated by phosphorylation; PYK2 transcription is repressed by glucose, and Pyk2p may be active under low glycolytic flux	12	11	11	6.75084	5.74785	13.7632	11.6235	10.0894	6.41294	8.879	9.62454	9.87857	8.10885	15055.8	6.57722	4.9634	15.0986	12.3658	9.33179	6.83399	7.31327	8.08116	10.6729	9.61445	14387.7	6.40241	5.20469	14.1518	11.6882	10.2646	7.37657	6.86939	8.3567	10.4778	10.0932	23990.1
YAL038W	CDC19	Pyruvate kinase, functions as a homotetramer in glycolysis to convert phosphoenolpyruvate to pyruvate, the input for aerobic (TCA cycle) or anaerobic (glucose fermentation) respiration	367	409	332	8.86366	7.21025	8.11729	8.87271	11.2863	9.96642	8.58807	9.5648	9.05754	9.3991	516701	9.00575	7.1279	8.30921	8.61108	11.4516	9.76261	8.916	9.4412	9.15457	9.12378	692847	8.94054	7.08225	8.06	8.7344	11.4589	9.85918	8.96371	9.39684	9.288	9.14216	607678
YOL012C	HTZ1	Histone variant H2AZ, exchanged for histone H2A in nucleosomes by the SWR1 complex; involved in transcriptional regulation through prevention of the spread of silent heterochromatin	4	4	3	8.57129	9.84717	8.18019	8.83224	8.40345	9.11843	8.72471	10.2592	9.85039	9.13127	11157	8.94111	10.1743	8.07995	8.45911	7.94162	9.26324	8.72721	10.4465	9.9315	8.95343	8454.8	8.45501	10.5753	8.26332	8.45904	8.29245	8.816	9.1966	10.3784	9.7357	8.74317	6093.48
YDL031W	DBP10	Putative ATP-dependent RNA helicase of the DEAD-box protein family, constituent of 66S pre-ribosomal particles; essential protein involved in ribosome biogenesis	40	48	48	7.86432	9.11607	7.38998	9.20027	8.00114	11.2189	8.94892	8.84658	10.1572	10.2018	69971.1	8.0288	9.35628	7.48098	9.12673	7.78204	11.4397	9.0316	8.99222	9.7929	9.85744	95832.3	7.5903	9.41556	7.16283	9.494	7.6139	11.6229	8.67828	9.1172	9.86908	10.3403	90198
YOR326W	MYO2	One of two type V myosin motors (along with MYO4) involved in actin-based transport of cargos; required for the polarized delivery of secretory vesicles, the vacuole, late Golgi elements, peroxisomes, and the mitotic spindle	48	64	57	8.42573	6.19207	9.29713	9.29248	8.86686	9.25527	9.72834	9.59148	10.1798	10.1018	106184	8.67626	5.93066	9.08234	9.58949	8.69897	9.3936	9.61952	10.1714	9.83735	9.90908	108887	8.5897	6.00379	8.61697	9.71401	8.52128	10.0805	9.64673	10.1018	9.91726	9.71348	127177
YAL029C	MYO4	One of two type V myosin motors (along with MYO2) involved in actin-based transport of cargos; required for mRNA transport, including ASH1 mRNA, and facilitating the growth and movement of ER tubules into the growing bud along with She3p	14	20	22	7.76385	7.99047	9.52694	8.86187	8.99826	9.7631	9.47549	8.54076	9.89603	10.1128	28425.6	7.83318	8.21632	8.72259	8.94676	9.03984	10.1455	9.3777	9.09289	9.46712	10.0591	24169.7	7.32715	8.41952	9.04389	8.82496	8.84736	10.374	9.20944	8.93278	9.57974	10.3573	46209.4
YOR063W	RPL3	Protein component of the large (60S) ribosomal subunit, has similarity to E. coli L3 and rat L3 ribosomal proteins; involved in the replication and maintenance of killer double stranded RNA virus	92	103	141	10.6967	9.71618	9.48047	8.44335	8.93992	7.2466	9.41462	9.40408	9.56205	7.9838	271669	10.4463	9.52045	9.33495	9.78873	8.41716	7.16213	9.4611	9.22943	9.40163	8.16244	296330	10.5193	9.78714	9.05442	8.5514	8.86587	7.38741	9.62022	9.34421	9.49089	8.28564	379877
YHR073W	OSH3	Member of an oxysterol-binding protein family with seven members in S. cerevisiae; family members have overlapping, redundant functions in sterol metabolism and collectively perform a function essential for viability	10	11	15	8.64595	9.27357	8.98308	9.27391	8.63522	9.31899	9.53107	9.20879	9.05009	8.98801	10285.4	8.86006	8.87598	10.005	9.19736	8.65613	8.03991	9.33087	9.71192	9.28896	8.95109	22490.7	8.98916	9.09264	8.99602	9.03093	8.56218	8.61329	10.1848	9.52938	9.15158	8.75766	42723.3
YBL050W	SEC17	Peripheral membrane protein required for vesicular transport between ER and Golgi, the 'priming' step in homotypic vacuole fusion, and autophagy; stimulates the ATPase activity of Sec18p; has similarity to mammalian alpha-SNAP	15	15	12	9.13476	11.592	9.66394	9.92532	9.08162	7.00116	9.80299	8.88919	8.57726	7.19385	30763.6	9.1676	11.6454	9.70422	9.80999	8.67263	7.27019	9.19924	9.02552	8.75303	7.66022	22856.5	9.02221	11.4193	9.62509	9.73563	8.85728	7.40391	9.24282	9.01416	8.60633	7.96941	22143.3
YNL116W	DMA2	Protein involved in ubiquitination; plays a role in regulating spindle position and orientation; functionally redundant with Dma1p; orthologous to human RNF8 protein, also has sequence similarity to human Chfr	4	4	7	9.98768	9.96524	9.06173	10.0815	8.44766	8.82916	9.46064	7.11358	8.35069	9.59783	8144.26	9.38283	9.8969	8.92155	10.2262	8.04915	10.6811	9.00154	7.82778	7.53909	9.3591	7580.68	9.52568	10.3256	9.36294	10.3765	8.24658	9.17418	8.92835	7.59874	7.40736	9.93895	12805.4
YHR115C	DMA1	Protein involved in ubiquitin ligation; plays a role in regulating spindle position and orientation; functionally redundant with Dma2p; orthologous to human RNF8 protein, also has sequence similarity to human Chfr.	2	4	4	9.63968	9.16752	10.3164	10.5521	8.59514	9.18253	9.33808	7.18464	8.29182	8.62219	6328.74	8.02563	8.69924	9.00143	10.5042	8.26358	9.41765	9.18968	7.99373	9.08093	10.7177	12097	9.26454	9.07113	10.557	10.6316	8.99485	8.66839	9.2557	7.20666	8.74304	8.49478	13095
YLR310C	CDC25	Membrane bound guanine nucleotide exchange factor (GEF or GDP-release factor); indirectly regulates adenylate cyclase through activation of Ras1p and Ras2p by stimulating the exchange of GDP for GTP; required for progression through G1	16	11	14	9.32943	10.7188	8.23655	8.96174	8.42466	9.38955	9.0416	8.79058	8.74466	9.27062	25031.5	9.17807	10.4427	8.13752	9.31435	8.35336	10.1559	8.78493	8.49264	8.73072	9.30911	14498	8.7054	10.3587	8.92049	9.08359	7.93102	9.94619	9.15787	8.61226	8.5468	9.64349	21829.3
YOR095C	RKI1	Ribose-5-phosphate ketol-isomerase, catalyzes the interconversion of ribose 5-phosphate and ribulose 5-phosphate in the pentose phosphate pathway; participates in pyridoxine biosynthesis	19	25	22	11.3711	8.82488	8.20984	8.56458	9.27848	9.0083	8.10229	9.28452	8.36324	9.90751	25312.7	11.0338	8.51956	8.76161	8.03534	9.84458	8.18867	9.28577	8.76091	8.85559	9.6623	45007.2	11.9994	8.74149	8.3982	7.80008	9.49536	8.31535	9.23212	8.71517	9.05514	9.16271	48820.9
YNL298W	CLA4	Cdc42p-activated signal transducing kinase of the PAK (p21-activated kinase) family, along with Ste20p and Skm1p; involved in septin ring assembly, vacuole inheritance, cytokinesis, sterol uptake regulation; phosphorylates Cdc3p and Cdc10p	9	11	9	8.42884	10.9344	8.05359	7.85028	9.22247	10.9438	8.13943	9.36885	8.90783	9.0785	9756.21	8.91066	11.3142	8.58807	8.66145	7.15985	10.487	7.71513	8.80617	9.54674	9.71249	15101.6	8.82471	11.9629	8.2375	7.74857	8.95155	10.7074	7.61023	9.32248	8.52412	9.04135	13413.3
YHL007C	STE20	Cdc42p-activated signal transducing kinase of the PAK (p21-activated kinase) family; involved in pheromone response, pseudohyphal/invasive growth, vacuole inheritance, down-regulation of sterol uptake; GBB motif binds Ste4p	20	24	26	9.22631	10.4119	8.09662	9.16002	8.29513	9.71586	8.90723	9.46332	8.93825	8.69498	26437.5	9.87038	10.0147	8.59516	8.68624	8.6868	9.42903	8.24509	9.18276	9.03618	9.16854	46625.1	9.65728	10.3051	8.33648	9.18335	8.28678	9.56516	8.1066	9.08586	8.8976	9.47863	64581.6
YGL140C	YGL140C	Putative protein of unknown function; non-essential gene; contains multiple predicted transmembrane domains	12	13	17	6.62842	8.02514	9.01872	10.1326	7.82341	9.42981	11.5264	8.77316	9.11807	10.4412	20014.9	7.00272	7.8525	8.93249	10.8562	7.57441	9.5599	10.5148	8.80856	8.95462	10.8361	22313.7	6.82329	7.89633	9.2645	10.4793	7.79019	9.13822	10.6838	8.66601	9.28069	10.8637	31349.3
YDR011W	SNQ2	Plasma membrane ATP-binding cassette (ABC) transporter, multidrug transporter involved in multidrug resistance and resistance to singlet oxygen species	27	34	33	7.87028	5.64123	8.74211	9.54711	7.79464	7.82146	7.95453	10.8515	11.2714	13.4648	56896.6	7.81994	5.39511	8.94496	9.63761	7.86225	7.27965	8.08294	11.041	11.6585	13.2209	53931.4	7.8165	5.20487	8.63259	9.73789	7.81429	7.5326	8.03169	11.1331	11.6503	13.3298	77143.9
YPL058C	PDR12	Plasma membrane ATP-binding cassette (ABC) transporter, weak-acid-inducible multidrug transporter required for weak organic acid resistance; induced by sorbate and benzoate and regulated by War1p; mutants exhibit sorbate hypersensitivity	19	22	15	8.47445	10.4635	7.70942	7.8639	7.65559	11.632	8.99875	10.1799	9.41937	8.53802	27011.9	8.34007	10.2182	7.87388	7.59363	7.45529	11.8942	8.55713	10.0251	10.0261	8.91438	40355.7	8.38905	10.3858	7.79844	7.85383	7.64705	11.8822	8.59523	10.0596	9.43924	8.88165	42112
YDR406W	PDR15	Plasma membrane ATP binding cassette (ABC) transporter, multidrug transporter and general stress response factor implicated in cellular detoxification; regulated by Pdr1p, Pdr3p and Pdr8p; promoter contains a PDR responsive element	4	6	8	7.35035	2.43282	14.326	12.497	12.3498	6.47072	11.6477	8.36755	7.74365	7.67061	3351.71	8.74972	4.15873	12.0082	12.7166	11.2612	5.5824	12.1392	7.49146	8.82927	7.95145	10895.9	7.98399	6.4323	10.2402	10.1713	10.2485	8.80335	10.2005	9.56512	8.13191	9.12993	10382.6
YOR153W	PDR5	Plasma membrane ATP-binding cassette (ABC) transporter, multidrug transporter actively regulated by Pdr1p; also involved in steroid transport, cation resistance, and cellular detoxification during exponential growth	69	77	73	7.49045	2.62232	9.52102	9.75836	9.49889	5.51498	7.6655	11.2895	12.6729	14.9318	119347	7.39866	2.30519	9.86823	10.0262	9.20275	5.46638	7.45056	11.1359	12.4656	15.6435	138818	7.35246	2.39638	9.53177	9.94474	9.4657	5.64774	7.52251	11.2488	12.3128	15.4538	157765
YDR429C	TIF35	eIF3g subunit of the core complex of translation initiation factor 3 (eIF3), which is essential for translation; stimulates resumption of ribosomal scanning during translation reinitiation	21	22	21	10.6679	10.4907	8.73392	8.56232	8.26677	9.55909	8.38986	8.47797	8.71336	9.04759	36331.5	10.6745	10.5267	9.26695	8.9494	7.66854	9.33249	8.73709	8.40102	8.82951	8.52888	49342.6	10.1543	10.9063	8.84461	8.85963	7.77263	9.89644	8.42313	8.86699	8.40013	8.78382	56746.3
YDL164C	CDC9	DNA ligase found in the nucleus and mitochondria, an essential enzyme that joins Okazaki fragments during DNA replication; also acts in nucleotide excision repair, base excision repair, and recombination	10	13	15	7.88658	8.80604	8.7515	8.56654	8.25025	10.1423	8.38534	9.0731	9.62616	11.457	16740.8	7.85983	7.91649	8.76927	8.42023	8.27301	9.33896	8.58208	9.02947	10.5152	12.2242	22719.8	7.70568	8.27496	8.8693	8.87894	7.7538	10.1848	7.97558	8.61963	10.2078	12.4315	24477.6
YOL082W	ATG19	Receptor protein specific for the cytoplasm-to-vacuole targeting (Cvt) pathway; delivers cargo proteins aminopeptidase I (Lap4p) and alpha-mannosidase (Ams1p) to the phagophore assembly site for packaging into Cvt vesicles	3	2	2	9.14307	10.6537	13.0213	11.0581	8.12925	8.64944	8.55709	6.44671	6.93567	8.27173	6041.75	8.11929	10.0334	13.7918	11.6014	7.30492	9.31564	8.40205	6.04779	7.25518	8.98492	10788.6	8.36042	9.06804	14.4249	12.6637	7.3193	8.20662	8.03151	5.65485	7.70591	9.42271	7965.98
YGL164C	YRB30	RanGTP-binding protein, inhibits RanGAP1 (Rna1p)-mediated GTP hydrolysis of RanGTP (Gsp1p); shares similarity to proteins in other fungi but not in higher eukaryotes	9	6	9	8.92199	10.0722	9.36982	9.17699	9.57857	9.24083	8.62808	8.56007	8.64169	8.71125	9767.05	8.34448	10.2745	8.88788	8.63232	10.2297	9.13655	9.03828	8.7921	8.73454	8.83382	9359.27	8.71105	9.83194	9.17536	8.51455	10.4909	8.85852	9.27623	8.72674	8.984	8.35288	17955
YHR020W	YHR020W	Protein of unknown function that may interact with ribosomes, based on co-purification experiments; has similarity to proline-tRNA ligase; YHR020W is an essential gene	62	66	69	10.0344	8.55324	8.6	8.67528	8.29761	9.34669	9.52191	8.73892	9.52783	9.62406	120984	10.2726	8.82498	8.72797	8.70211	7.87723	9.1252	9.4306	8.982	9.30876	9.67959	136361	9.72231	9.03987	8.52178	8.57419	8.20265	9.62297	9.18781	9.25232	8.89293	9.89354	171890
YGR043C	NQM1	Transaldolase of unknown function; transcription is repressed by Mot1p and induced by alpha-factor and during diauxic shift	1	2	1	6.43029	8.99084	12.2921	10.144	10.9321	4.82382	10.4585	9.78682	10.6885	6.30634	339.12	5.79462	8.5389	14.4696	12.2203	8.8612	5.05191	8.54177	10.9225	9.39485	7.06797	1793.47	6.28128	8.08558	11.6594	11.8034	11.2478	4.77945	9.6529	10.7931	9.70405	6.87917	598.258
YLR354C	TAL1	Transaldolase, enzyme in the non-oxidative pentose phosphate pathway; converts sedoheptulose 7-phosphate and glyceraldehyde 3-phosphate to erythrose 4-phosphate and fructose 6-phosphate	71	60	58	8.95594	8.52373	11.5139	10.1192	9.48782	5.54793	10.1498	9.9815	9.34887	7.23161	150677	9.13261	8.69898	11.5713	10.2701	9.4733	5.41291	9.99322	10.0037	9.26758	7.09251	147584	9.07124	8.61401	11.6381	10.7777	9.3448	5.40267	9.78886	9.91241	9.17182	7.16436	159485
YMR067C	UBX4	UBX (ubiquitin regulatory X) domain-containing protein that interacts with Cdc48p	11	14	21	9.33825	11.6263	8.16122	8.78966	8.54377	9.62406	8.90824	8.8055	8.41612	8.68939	18296.7	9.59649	11.3618	8.54142	8.25577	9.07029	9.34131	8.76107	8.72192	8.60358	8.66264	23690.7	9.55192	11.6153	8.611	8.89761	8.79053	9.25821	8.56419	8.80305	8.39042	8.42743	45653.5
YCL052C	PBN1	Essential component of glycosylphosphatidylinositol-mannosyltransferase I, required for the autocatalytic post-translational processing of the protease B precursor Prb1p, localizes to ER in lumenal orientation; homolog of mammalian PIG-X	7	5	6	6.54885	9.47348	9.64111	9.38825	8.87175	10.1857	10.1072	7.78501	8.69073	10.2263	8806.6	6.74685	9.61609	9.93945	9.24577	8.30456	10.2298	9.60916	8.59272	9.04604	9.55471	5861.05	6.70452	10.3379	9.72853	8.94608	8.62068	9.85507	10.0072	8.90539	8.54066	9.27087	8905.64
YOR086C	TCB1	Lipid-binding protein containing three calcium and lipid binding domains; non-tagged protein localizes to mitochondria and GFP-fusion protein localizes to the cell periphery; C-termini of Tcb1p, Tcb2p and Tcb3p interact	45	38	47	7.64309	6.45047	10.1235	10.1835	9.39337	8.99986	10.5908	9.06965	9.31684	9.13727	103799	7.82002	6.73502	10.2449	10.174	9.16525	9.04394	10.4064	9.1854	9.27717	8.83747	76800.8	7.86938	6.69058	10.7	10.2584	9.33702	8.89264	10.037	8.99322	9.23099	8.89259	99083.3
YMR169C	ALD3	Cytoplasmic aldehyde dehydrogenase, involved in beta-alanine synthesis; uses NAD+ as the preferred coenzyme; very similar to Ald2p; expression is induced by stress and repressed by glucose	2	1	4	8.71965	5.2029	9.84533	14.5501	8.31535	2.80353	8.86737	14.6445	11.9034	5.99738	2042.89	8.50432	4.89604	9.84204	14.9334	8.11717	2.75973	9.34175	14.643	11.7393	6.10659	451.695	9.10982	5.7383	8.10532	14.9587	7.29167	3.62622	8.40831	17.0215	9.93616	6.63782	2567.23
YMR170C	ALD2	Cytoplasmic aldehyde dehydrogenase, involved in ethanol oxidation and beta-alanine biosynthesis; uses NAD+ as the preferred coenzyme; expression is stress induced and glucose repressed; very similar to Ald3p	6	7	5	8.36099	9.74461	10.2882	10.5027	11.4843	5.40947	9.3532	8.98711	8.60877	8.11813	8677.46	8.64293	9.45258	9.93881	10.1968	10.6915	5.31422	10.0165	9.50663	8.72583	8.439	11083.2	8.21032	9.71697	9.86024	10.2467	10.8643	5.65071	9.49511	9.62349	8.97595	8.24938	9072.76
YPL061W	ALD6	Cytosolic aldehyde dehydrogenase, activated by Mg2+ and utilizes NADP+ as the preferred coenzyme; required for conversion of acetaldehyde to acetate; constitutively expressed; locates to the mitochondrial outer surface upon oxidative stress	98	106	100	9.12083	9.48621	8.18671	7.82282	10.6424	10.0012	8.64013	9.55871	8.9665	8.49205	244527	9.43167	9.44069	8.42644	7.61839	11.0421	9.19458	9.33467	9.52503	9.04119	7.86296	251177	9.47932	9.68166	8.37635	7.57102	11.043	9.24269	9.55334	9.42032	8.87816	7.69257	285192
YER073W	ALD5	Mitochondrial aldehyde dehydrogenase, involved in regulation or biosynthesis of electron transport chain components and acetate formation; activated by K+; utilizes NADP+ as the preferred coenzyme; constitutively expressed	28	33	29	13.3014	10.1429	7.88891	8.15845	9.63704	8.97872	9.89443	8.0721	7.34919	7.45805	59589.9	14.0131	9.71581	8.38515	7.8987	10.1473	8.42902	10.0139	7.68617	7.65035	7.01053	77152.6	13.6597	9.84575	8.07528	8.10577	10.2379	8.51089	9.89836	7.90481	7.701	6.97674	73389.1
YOR374W	ALD4	Mitochondrial aldehyde dehydrogenase, required for growth on ethanol and conversion of acetaldehyde to acetate; phosphorylated; activity is K+ dependent; utilizes NADP+ or NAD+ equally as coenzymes; expression is glucose repressed	27	37	36	8.57239	10.0081	7.91018	9.12082	9.67382	6.56391	11.5485	10.9226	8.9596	7.59257	67071.9	8.57214	10.2629	7.71037	9.12034	9.67717	6.43378	11.4976	11.2568	8.79795	7.60893	70409.2	8.40684	10.1892	7.72417	9.32739	9.49201	6.75609	11.2757	11.2561	8.87065	7.60728	101885
YLR136C	TIS11	mRNA-binding protein expressed during iron starvation; binds to a sequence element in the 3'-untranslated regions of specific mRNAs to mediate their degradation; involved in iron homeostasis	1	0	0	8.02338	8.71216	4.0137	8.50704	7.53637	10.809	8.74947	10.8462	12.0629	11.7172	642.387	0	0	0	0	0	0	0	0	0	0	0	0	0	0	0	0	0	0	0	0	0	0
YEL011W	GLC3	Glycogen branching enzyme, involved in glycogen accumulation; green fluorescent protein (GFP)-fusion protein localizes to the cytoplasm in a punctate pattern	12	12	12	6.05595	6.26672	10.2457	11.2486	10.2248	4.52953	10.2594	11.6185	11.4141	9.02168	20536	5.39402	5.64598	10.1796	11.7345	9.93721	4.1896	10.3958	11.7996	12.2145	9.41475	19904.5	4.96185	5.33828	10.9393	11.6997	10.2952	3.96126	10.9289	11.5543	11.9475	9.2492	18742.2
YPL063W	TIM50	Essential component of the Translocase of the Inner Mitochondrial membrane (TIM23 complex); acts as receptor for the TIM23 complex guiding incoming precursors from the TOM complex; may control the gating of the Tim23p-Tim17p channel	35	34	36	8.90279	8.97407	8.98601	9.31073	8.34595	9.59787	9.54344	9.28417	9.10186	8.86426	95168.1	8.3496	8.79587	8.67045	9.3659	8.94037	9.74911	9.11739	9.50454	9.04887	9.35643	85194	8.31568	8.87657	9.22425	9.82791	8.85865	9.53951	9.17671	8.89403	9.40398	8.78582	100425
YMR314W	PRE5	Alpha 6 subunit of the 20S proteasome	26	25	21	9.9411	12.8332	8.91555	8.83579	8.43559	8.14536	8.77838	8.50212	8.33733	8.15646	67525.6	9.67178	14.0971	8.44843	9.16261	7.89897	8.35424	8.99577	8.82475	7.79964	7.65974	74774.1	9.67657	12.7864	8.81682	8.82575	8.51591	7.9762	9.13325	8.5819	8.73007	7.86101	50694.5
YNL087W	TCB2	Bud-specific protein with a potential role in membrane trafficking; GFP-fusion protein migrates from the cell surface to intracellular vesicles near vacuole; contains 3 calcium and lipid binding domains; mRNA is targeted to the bud	37	40	38	8.33667	5.58517	9.03046	8.36125	9.69988	11.1095	9.20236	9.53769	9.0603	11.029	66247.2	8.46484	5.24873	9.09054	8.57559	9.87919	11.1177	9.17168	9.34386	8.92792	11.0864	80872	8.54056	5.53296	8.93132	8.56203	9.80978	10.8928	9.06343	9.2528	9.1228	11.215	89081.1
YHR063C	PAN5	2-dehydropantoate 2-reductase, part of the pantothenic acid pathway, structurally homologous to E. coli panE	25	30	28	7.76857	7.79775	8.45134	9.37572	10.116	9.11704	10.2645	9.88206	9.46339	8.67409	62631.4	7.84507	7.84537	8.52376	9.29587	10.3828	8.68134	10.7216	9.77542	9.51909	8.31232	84384.5	7.69089	7.74081	8.85221	9.49674	10.1162	8.86685	10.2035	9.86232	9.43013	8.65333	80026.8
YOR207C	RET1	Second-largest subunit of RNA polymerase III, which is responsible for the transcription of tRNA and 5S RNA genes, and other low molecular weight RNAs	16	24	20	6.9813	7.2388	7.50378	8.63493	8.42404	11.8855	8.89711	8.96934	10.2941	12.1443	22061.1	7.15415	6.54114	7.05599	8.19484	8.14226	12.202	8.97441	8.7897	10.1682	13.6927	42681.6	7.55724	6.98777	7.2434	8.2235	8.15912	12.0177	8.91317	8.52675	10.6235	12.664	50438.7
YFR038W	IRC5	Putative ATPase containing the DEAD/H helicase-related sequence motif; null mutant displays increased levels of spontaneous Rad52p foci	3	3	6	7.423	8.37884	8.10262	9.34355	8.87244	9.64703	8.40208	9.34802	9.63015	11.7947	1663.2	7.65374	7.35381	7.60868	9.03754	7.66093	11.3489	8.51421	8.74209	9.92109	13.0691	5078.81	7.77052	7.81081	7.48579	9.05865	8.81716	11.056	8.28941	8.46679	9.68368	12.4665	8269.15
YGR112W	SHY1	Mitochondrial inner membrane protein required for assembly of cytochrome c oxidase (complex IV); associates with complex IV assembly intermediates and complex III/complex IV supercomplexes; similar to human SURF1 involved in Leigh Syndrome	6	4	3	6.62752	12.0323	8.77569	9.59737	9.66502	7.9816	10.19	9.12306	8.83236	8.05537	7471.39	7.0798	9.66178	10.3079	11.0606	8.28043	6.9863	9.25226	10.8086	9.59399	7.85413	2317.56	6.78066	9.15771	8.73494	9.37842	9.55832	8.706	8.84818	9.59964	9.23723	10.9042	4102.1
YAL059W	ECM1	Pre-ribosomal factor involved in 60S ribosomal protein subunit export; associates with the pre-60S particle; shuttles between the nucleus and cytoplasm	12	15	16	9.61479	15.7057	6.48231	8.29867	7.6589	11.3792	7.54537	7.7758	8.46802	7.97946	19998.3	10.0303	15.0865	6.99382	8.01878	7.88321	11.6744	7.49677	7.78118	7.99198	7.93471	35160.1	9.98687	14.8419	6.87129	7.99687	7.88029	11.5056	7.50441	7.72504	8.36464	8.24198	32958.3
YOR092W	ECM3	Non-essential protein of unknown function; involved in signal transduction and the genotoxic response; induced rapidly in response to treatment with 8-methoxypsoralen and UVA irradiation	3	3	2	8.22787	9.23223	9.57284	10.3758	8.68618	9.37467	10.2532	9.13851	7.91386	8.11362	2584.07	8.52403	8.98097	8.81244	10.5973	8.05873	9.54179	9.66581	9.11493	8.5866	9.00556	2835.24	7.95478	8.99778	8.95335	9.83393	8.98025	9.17865	10.2474	9.11047	9.83987	7.80834	3656.97
YGR097W	ASK10	Component of RNA polymerase II holoenzyme, phosphorylated in response to oxidative stress; has a role in destruction of Ssn8p; proposed to function in activation of the glycerol channel Fps1p; paralogous to Rgc1p	13	11	15	8.65607	10.128	9.49774	11.5913	9.49158	7.27309	8.60851	8.70413	8.40901	8.51346	22860.4	9.57955	9.42026	9.97504	11.5516	9.65178	7.19203	8.81111	8.11634	8.26459	8.32681	21925.4	9.23217	9.5415	9.9836	10.8737	9.78089	7.02314	8.95343	8.27894	8.93837	8.27654	32458.1
YPR115W	RGC1	Pleckstrin homology domain containing protein proposed to function as a glycerol channel activator; paralogous to Ask10p; green fluorescent protein (GFP)-fusion protein localizes to the cytoplasm	12	5	12	9.28057	8.25288	11.1202	10.2224	10.0425	5.89644	9.31276	8.61278	9.14969	8.98462	15436.6	8.57923	8.51253	10.3584	10.7138	9.88617	5.83573	8.99184	9.15907	9.39371	9.48497	13924.6	8.83124	7.82987	11.3939	10.4286	10.1299	5.32575	9.34713	9.09246	9.02069	9.48496	17615.7
YPR010C	RPA135	RNA polymerase I second largest subunit A135	45	52	51	7.39657	6.07452	8.17071	9.18343	7.75072	8.37557	9.1163	9.04127	10.964	14.8949	77876.9	7.09118	5.68667	7.93995	8.88314	7.73994	8.08898	9.83339	8.74484	11.408	15.5466	133805	7.54073	5.77057	7.86423	8.52823	8.32991	8.1587	10.2017	8.59772	11.3061	14.5936	124437
YGL157W	ARI1	NADPH-dependent aldehyde reductase, utilizes aromatic and alophatic aldehyde substrates; member of the short-chain dehydrogenase/reductase superfamily	13	14	14	8.44055	8.37431	13.0314	9.50761	10.8647	6.31266	9.92568	7.57391	8.4367	8.39857	24864.2	8.81416	8.03611	13.4133	9.31759	11.0649	5.98713	9.89968	7.57772	8.62879	8.17669	37914.4	9.22584	7.97679	12.6405	8.75988	11.0958	6.48498	10.4878	7.57307	8.68355	7.98766	43525.2
YGL039W	YGL039W	Oxidoreductase shown to reduce carbonyl compounds to chiral alcohols	15	16	13	10.4913	8.51867	10.16	9.1998	7.59468	9.41337	8.04926	8.5097	9.10926	9.87264	29050.6	10.3625	8.71617	10.2529	9.43659	7.62775	9.36447	7.5206	8.6376	8.83959	10.1543	37796	10.8	8.04721	10.2496	9.33954	7.77685	9.27137	7.97679	8.55223	9.17964	9.70497	27937.4
YER155C	BEM2	Rho GTPase activating protein (RhoGAP) involved in the control of cytoskeleton organization and cellular morphogenesis; required for bud emergence	50	57	52	8.14871	9.49369	8.97181	8.46316	8.13289	8.69692	9.77293	9.41264	9.97253	9.85345	78880.9	8.43239	9.29564	9.23608	8.37916	8.36942	8.7047	9.43967	9.42867	9.84745	9.7923	106578	8.14864	9.36489	9.39051	8.33957	8.24763	8.5904	9.61258	9.38326	9.88457	9.95029	126891
YPR110C	RPC40	RNA polymerase subunit AC40, common to RNA polymerase I and III	30	29	25	9.75394	10.8807	7.71008	8.85722	8.52439	11.9556	7.83352	8.37451	8.40969	8.62563	66227.9	9.47805	10.308	7.23604	9.06155	8.54427	12.5394	7.97203	8.46547	8.424	8.84627	66731.1	9.34972	10.8647	7.73646	8.84493	8.8111	11.0121	8.78466	8.77211	8.40392	8.3379	86340.7
YOR043W	WHI2	Protein required, with binding partner Psr1p, for full activation of the general stress response, possibly through Msn2p dephosphorylation; regulates growth during the diauxic shift; negative regulator of G1 cyclin expression	6	10	10	6.30911	11.3831	10.6932	10.6347	9.552	7.62656	8.85296	9.84504	9.97944	5.99283	11800.9	7.31507	11.1361	9.6025	11.1164	8.1504	8.79113	10.0738	10.3304	10.0665	4.26226	8925.6	5.7972	11.2772	10.385	11.5002	9.53719	6.85753	9.91133	10.7294	10.8845	4.01642	10642.5
YBR035C	PDX3	Pyridoxine (pyridoxamine) phosphate oxidase, has homologs in E. coli and Myxococcus xanthus; transcription is under the general control of nitrogen metabolism	8	16	18	9.385	13.5406	9.47464	9.38547	8.76931	7.08701	9.44939	8.92571	8.11838	6.71915	16209.9	9.83158	13.3717	9.85104	8.96039	9.51729	6.6227	9.34129	8.07682	8.48938	6.85735	30595.3	9.67362	13.599	9.24178	8.84426	9.25157	7.0162	10.2783	8.27429	8.37977	6.34755	32700.1
YNL258C	DSL1	Peripheral membrane protein needed for Golgi-to-ER retrograde traffic; forms a complex with Sec39p and Tip20p that interacts with ER SNAREs Sec20p and Use1p; component of the ER target site that interacts with coatomer; interacts with Cin5p	12	13	14	7.31102	7.75382	9.1486	9.39633	8.83942	9.6461	8.53892	9.90647	9.83424	10.5603	16321.2	7.82488	7.72483	9.12401	9.19522	8.80699	10.1976	8.68448	9.34188	9.49798	10.5001	21197.2	8.29235	7.91217	9.26127	8.8073	9.35688	9.2589	8.99539	9.48028	9.78028	9.7704	28870.5
YJL131C	AIM23	Putative protein of unknown function; the authentic non-tagged protein is detected in highly purified mitochondria; null mutant is viable, displays severe respiratory growth defect and elevated frequency of mitochondrial genome loss	4	6	4	8.7283	12.3856	7.20358	8.4031	9.80618	8.83928	9.16393	9.54111	8.23829	8.58584	8782.04	7.68401	12.9179	7.23979	8.29323	10.0056	9.70152	8.70142	9.2999	8.7332	8.32068	6194.69	7.84909	12.6275	7.92625	8.56824	9.95255	9.0308	9.07562	9.44199	8.6294	7.82023	9799.64
YPR135W	CTF4	Chromatin-associated protein, required for sister chromatid cohesion; interacts with DNA polymerase alpha (Pol1p) and may link DNA synthesis to sister chromatid cohesion	9	11	14	7.07365	6.9226	8.49512	8.8923	8.80516	9.54014	9.02112	9.29458	10.5514	12.3592	12839.3	7.40385	6.76678	8.22364	8.60532	9.09665	8.87383	9.1954	9.36301	11.2138	12.1869	17799.3	7.38151	7.05811	8.19207	8.44803	9.18544	9.4309	9.02469	9.21923	10.7353	12.2357	22369.3
YLR409C	UTP21	Subunit of U3-containing 90S preribosome and Small Subunit (SSU) processome complexes involved in production of 18S rRNA and assembly of small ribosomal subunit; synthetic defect with STI1 Hsp90 cochaperone; human homolog linked to glaucoma	22	27	16	7.14961	6.84437	6.82561	7.79811	6.8427	15.0839	7.39977	7.75604	10.538	14.7904	41563.7	6.78794	7.50183	7.0153	7.56902	6.57056	14.9577	8.17708	8.00169	10.5268	13.7839	36393.2	6.54938	7.42349	6.66296	7.94853	6.70197	15.2006	7.79619	8.05414	10.2673	14.3185	32811.4
YJR121W	ATP2	Beta subunit of the F1 sector of mitochondrial F1F0 ATP synthase, which is a large, evolutionarily conserved enzyme complex required for ATP synthesis; phosphorylated	53	49	52	8.95483	9.66447	9.49641	10.0303	9.25847	7.07872	9.5723	9.77581	9.03849	8.00852	67208.1	9.16709	9.99279	9.27603	10.1332	8.85139	6.93398	9.70403	9.94894	9.00765	7.89881	79546	9.17206	9.7809	9.41496	11.1288	8.81774	6.91535	9.47056	9.55688	8.95389	7.66786	84626.3
YMR105C	PGM2	Phosphoglucomutase, catalyzes the conversion from glucose-1-phosphate to glucose-6-phosphate, which is a key step in hexose metabolism; functions as the acceptor for a Glc-phosphotransferase	19	18	10	4.34337	3.63098	13.3708	9.96957	11.7763	2.34837	8.71548	14.6123	15.5678	6.55617	37157.4	4.46198	3.55463	14.3053	9.78432	11.8082	2.18068	8.85861	14.4805	15.323	6.14246	43475.4	4.40395	3.67791	13.8208	9.53153	11.8164	2.65366	8.71957	14.6566	14.8459	6.79578	25500.5
YKL127W	PGM1	Phosphoglucomutase, minor isoform; catalyzes the conversion from glucose-1-phosphate to glucose-6-phosphate, which is a key step in hexose metabolism	16	17	15	8.24108	7.69057	10.6901	10.0058	8.4495	8.86075	9.65107	8.81708	9.31903	9.18131	26975.7	8.41618	7.46716	10.3735	9.80279	8.72155	9.6358	9.14368	8.61524	9.69995	9.01064	18328.6	7.94527	7.69206	10.752	10.2929	8.27421	8.93413	9.30929	9.14364	9.24968	9.30294	24954.5
YLL018C	DPS1	Aspartyl-tRNA synthetase, primarily cytoplasmic; homodimeric enzyme that catalyzes the specific aspartylation of tRNA(Asp); class II aminoacyl tRNA synthetase; binding to its own mRNA may confer autoregulation	70	81	74	9.77531	7.56648	9.26657	9.38372	8.90614	8.93204	9.53231	8.94529	9.13061	9.47324	176148	9.94504	7.59911	9.48802	9.52667	8.54413	8.78168	9.41828	9.15083	9.20431	9.25817	221004	9.55573	7.69762	9.39027	9.60871	8.83046	8.90881	9.28519	9.24473	9.11262	9.2672	206085
YLR088W	GAA1	Subunit of the GPI (glycosylphosphatidylinositol):protein transamidase complex, removes the GPI-anchoring signal and attaches GPI to proteins in the ER	6	4	4	6.74351	10.6857	10.0885	8.50148	8.22427	9.07585	9.59398	8.65088	8.60633	10.7444	14404.8	7.16447	10.7404	9.03535	9.57917	6.00474	9.71938	10.5845	8.10396	9.21762	10.7593	2947.75	6.86192	9.80992	7.51686	8.57312	8.37335	11.2839	10.2401	8.77304	9.85243	9.63519	7860.94
YAR042W	SWH1	Protein similar to mammalian oxysterol-binding protein; contains ankyrin repeats; localizes to the Golgi and the nucleus-vacuole junction	21	34	36	7.77794	9.20587	9.20308	9.75906	9.19264	8.01986	9.55316	9.01226	9.6374	9.5422	40618.9	7.75314	10.0484	9.66021	9.42358	9.50138	7.36576	10.2041	8.86713	9.05118	9.04011	59170.5	7.91227	9.76753	9.39361	9.60044	9.04948	7.81187	9.98507	8.89307	9.59838	8.88713	81712.4
YIL125W	KGD1	Component of the mitochondrial alpha-ketoglutarate dehydrogenase complex, which catalyzes a key step in the tricarboxylic acid (TCA) cycle, the oxidative decarboxylation of alpha-ketoglutarate to form succinyl-CoA	34	40	41	9.79826	6.37963	9.59894	9.16123	10.1994	7.90194	10.8785	10.163	8.75834	8.05256	105274	9.47278	6.58923	9.47753	8.78172	10.8617	7.58101	11.3285	9.99153	8.90399	7.94181	118613	9.7676	6.63984	8.95176	8.90484	10.4393	7.89002	11.6764	10.097	9.02419	7.52718	144613
YBR204C	LDH1	Serine hydrolase; exhibits active esterase plus weak triacylglycerol lipase activities; proposed role in lipid homeostasis, regulating phospholipid and non-polar lipid levels and required for mobilization of LD-stored lipids; localizes to the lipid droplet (LD) surface; contains a classical serine containing catalytic triad (GxSxG motif)	1	5	7	6.88558	8.7205	9.76885	8.82409	9.71038	7.69922	10.0387	10.8934	9.36192	8.99852	1265.61	7.34539	8.41407	9.65896	9.22266	10.7031	7.46858	9.88788	9.13832	9.3568	9.71904	18029.4	7.57014	8.32993	9.55256	8.9086	10.8316	7.16928	10.1755	9.14643	9.85589	9.37216	25466.9
YNL022C	YNL022C	Putative cytosine 5-methyltransferase, contains seven beta-strand methyltransferase motif similar to NOP2/YNL061W; green fluorescent protein (GFP)-fusion protein localizes to the nucleus; predicted to be involved in ribosome biogenesis	10	6	9	8.14765	9.69405	7.83441	8.23249	8.63949	11.6078	8.4022	8.60733	9.34671	10.4348	15182.5	7.85731	10.1752	6.99928	8.38587	8.69417	12.6143	7.69382	8.66275	8.40953	11.3985	8596.39	8.19372	9.86828	7.52384	8.0127	8.67731	11.1738	8.63865	8.74421	9.5327	10.5573	20312.2
YDL190C	UFD2	Ubiquitin chain assembly factor (E4) that cooperates with a ubiquitin-activating enzyme (E1), a ubiquitin-conjugating enzyme (E2), and a ubiquitin protein ligase (E3) to conjugate ubiquitin to substrates; also functions as an E3	19	26	22	7.16058	6.22926	10.295	10.2172	9.73719	8.2696	9.84031	8.97549	9.9235	10.268	49171.2	7.32202	5.98907	10.4445	10.0274	9.96073	8.20447	10.3094	8.94287	9.79297	9.90691	61288.8	7.41876	6.73713	9.96873	9.29884	10.1107	8.34072	10.7906	8.96927	9.58518	9.69061	55987.9
YDR197W	CBS2	Mitochondrial translational activator of the COB mRNA; interacts with translating ribosomes, acts on the COB mRNA 5'-untranslated leader	1	0	0	9.14136	14.5301	9.8855	8.46771	7.00674	9.97397	8.46812	7.26565	8.7134	7.43678	1056.69	0	0	0	0	0	0	0	0	0	0	0	0	0	0	0	0	0	0	0	0	0	0
YML067C	ERV41	Protein localized to COPII-coated vesicles, forms a complex with Erv46p; involved in the membrane fusion stage of transport; has homology to human ERGIC2 (PTX1) protein	9	9	11	7.52803	9.69302	9.48985	8.71833	8.33429	8.39798	11.019	8.34052	9.80975	9.57584	25022.3	7.79762	9.85552	9.39753	8.67137	8.51813	8.1734	10.6781	8.71328	9.67047	9.4484	30235.4	7.19327	9.67931	9.34608	9.56188	8.02443	8.5289	10.2353	8.99697	9.29269	10.0383	28225.4
YDR159W	SAC3	Nuclear pore-associated protein; required for biogenesis of the small ribosomal subunit; component of TREX-2 complex (Sac3p-Thp1p-Sus1p-Cdc31p) involved in transcription elongation and mRNA export from the nucleus; involved in post-transcriptional tethering of active genes to the nuclear periphery and to non-nascent mRNP; mutant displays reduced transcription elongation in the G-less-based run-on…	1	5	5	7.05019	10.0128	7.82687	9.58938	7.82251	8.31615	10.8648	8.67861	10.0931	10.661	276.905	6.78742	9.26018	7.52771	8.98697	8.06945	10.0655	9.2254	10.3245	9.6402	11.0208	5492.86	7.09371	9.68257	7.60213	9.16843	8.16105	9.8736	8.54382	10.0746	10.0251	10.6806	2799.29
YPL126W	NAN1	U3 snoRNP protein, component of the small (ribosomal) subunit (SSU) processosome containing U3 snoRNA; required for the biogenesis of18S rRNA	18	20	20	7.13213	6.92853	7.54175	7.88594	7.88636	12.9931	8.44952	8.2203	10.4571	13.5026	38007.3	7.29971	6.86061	8.49594	8.00342	7.63913	12.7797	8.37211	8.08134	10.3576	13.0119	41082.4	7.26227	6.97074	7.84462	8.36254	7.55735	12.9966	7.6529	8.15911	10.1851	13.923	57997.9
YGL236C	MTO1	Mitochondrial protein, forms a heterodimer complex with Mss1p that performs the 5-carboxymethylaminomethyl modification of the wobble uridine base in mitochondrial tRNAs; required for respiration in paromomycin-resistant 15S rRNA mutants	2	3	4	10.5533	11.4041	8.96469	9.07698	10.1318	7.55567	8.52506	8.67514	8.37486	7.61275	3360.75	9.64017	11.5916	9.85598	9.155	10.956	7.43402	8.99578	7.74149	8.1436	7.39299	8851.36	9.69505	11.7496	9.36584	9.61471	10.4232	8.05699	8.28664	8.07543	7.94354	7.6927	12158
YDL019C	OSH2	Member of an oxysterol-binding protein family with seven members in S. cerevisiae; family members have overlapping, redundant functions in sterol metabolism and collectively perform a function essential for viability	21	23	24	7.70391	7.10086	10.3068	9.38926	10.1979	6.97646	10.7532	9.84848	9.83599	8.78073	38623.7	7.88692	6.68127	10.218	9.63502	9.86308	6.84595	10.3626	10.1061	10.1395	9.18161	53152.5	8.19378	6.90513	10.361	9.31021	10.0186	7.00537	10.5857	9.89082	9.78173	8.85573	47730.5
YKL068W	NUP100	Subunit of the nuclear pore complex (NPC) that is localized to both sides of the pore; contains a repetitive GLFG motif that interacts with mRNA export factor Mex67p and with karyopherin Kap95p; homologous to Nup116p	13	13	11	10.5746	10.7077	7.94398	8.65687	8.28327	10.6148	8.4052	8.5817	8.39946	8.74686	38515.4	10.3963	10.3148	8.80941	8.50989	8.86132	10.0652	8.5802	8.30015	8.73181	8.33791	37317.8	10.2679	10.2379	8.98111	9.08684	8.74349	9.4717	8.5321	8.69711	8.52629	8.36367	48134.5
YNL253W	TEX1	Protein involved in mRNA export, component of the transcription export (TREX) complex	3	5	5	7.20504	5.94111	7.10798	8.52877	9.3083	11.6286	7.28251	7.78394	11.0231	15.1942	9681.37	7.40156	6.34058	7.90023	8.21703	9.18453	11.493	8.01253	8.31911	10.5745	13.4684	11755	7.45503	7.22357	7.94205	8.64477	9.5056	10.559	8.40627	8.76591	10.1235	12.2877	13912.9
YOL058W	ARG1	Arginosuccinate synthetase, catalyzes the formation of L-argininosuccinate from citrulline and L-aspartate in the arginine biosynthesis pathway; potential Cdc28p substrate	14	16	23	15.5196	8.88879	2.11594	5.55252	14.5915	12.5123	9.96241	13.464	4.10539	4.1789	49456.2	14.5233	8.85233	3.38823	6.09779	12.8549	11.7053	10.2139	12.7428	5.06955	5.50372	43637.7	15.1476	8.95027	2.66649	5.53862	14.3416	11.4552	10.6744	13.1133	4.51972	4.58086	68969.8
YHR077C	NMD2	Protein involved in the nonsense-mediated mRNA decay (NMD) pathway; interacts with Nam7p and Upf3p; involved in telomere maintenance	17	19	24	9.16233	9.58468	8.55084	8.91555	8.99008	8.89336	9.06046	9.39504	9.30757	9.04939	33426.1	9.08648	9.45033	8.17232	9.04365	8.42268	9.71806	8.68084	9.38745	9.15061	9.79852	30058.3	9.1741	9.6969	8.93953	8.86269	8.47565	9.15008	9.1257	9.43763	8.93394	9.11377	39964.1
YPR065W	ROX1	Heme-dependent repressor of hypoxic genes; contains an HMG domain that is responsible for DNA bending activity	1	2	3	9.73726	7.01417	8.74721	8.14615	11.4983	9.80317	10.6017	8.86	8.25589	8.24323	4728.08	9.66837	5.87288	8.59222	7.91764	11.5849	8.97176	11.1793	8.47661	9.36281	9.30715	3688.24	9.81308	5.59209	9.08877	7.90077	11.1863	10.1575	10.723	8.8413	8.98239	8.65255	15819.6
YJL070C	YJL070C	Putative protein of unknown function with similarity to AMP deaminases; the authentic, non-tagged protein is detected in highly purified mitochondria in high-throughput studies; YJL070C is a non-essential gene	6	3	3	7.41909	9.87189	9.73809	9.83418	10.7983	6.36734	9.81888	9.14664	9.35075	8.53136	8530.39	7.18352	8.85446	10.729	9.73733	10.4661	6.8719	9.89867	8.99801	9.81915	8.34183	3638.27	8.14899	10.0248	9.76574	9.78462	11.0342	6.8249	9.8195	8.41088	8.78185	8.30574	3634.3
YDR299W	BFR2	Essential protein that is a component of 90S preribosomes; may be involved in rRNA processing; multicopy suppressor of sensitivity to Brefeldin A; expression is induced during lag phase and also by cold shock	30	26	27	10.2819	10.8712	7.57623	10.3911	7.68841	12.1572	7.39928	6.84378	8.49433	9.2215	62370.2	10.5903	11.4509	7.43665	9.25506	7.88764	12.4146	7.59403	7.37948	8.10181	8.76774	62025.3	10.4931	11.3182	7.73063	9.41379	7.99211	11.4966	7.44225	7.34608	8.65855	9.00999	61589.4
YJR050W	ISY1	Member of NineTeen Complex (NTC) that contains Prp19p and stabilizes U6 snRNA in catalytic forms of spliceosome containing U2, U5, and U6 snRNAs, interacts with Prp16p to modulate splicing fidelity; isy1 syf2 cells have defective spindles	3	2	6	9.04569	10.4512	8.33886	8.96321	8.82522	9.72154	8.69252	8.75731	8.99025	9.12689	4466.4	8.82274	10.5591	8.19237	8.82051	8.34403	10.4046	7.7483	9.49636	9.12879	9.38092	2552.29	8.88414	8.83439	7.46018	9.96591	7.95177	8.52663	9.70713	9.90064	9.4289	10.2276	5760.46
YDR049W	VMS1	Component of a Cdc48p-complex involved in protein quality control; exhibits cytosolic and ER-membrane localization, with Cdc48p, during normal growth, and contributes to ER-associated degradation (ERAD) of specific substrates at a step after their ubiquitination; forms a mitochondrially-associated complex with Cdc48p and Npl4p under oxidative stress that is required for ubiquitin-mediated mitocho…	17	17	17	9.41015	9.62725	8.25542	8.80122	9.01115	10.4465	9.65457	8.79245	8.64487	8.26698	31384.3	9.47582	9.46328	7.81966	8.78723	9.46555	10.4274	10.0692	9.01527	8.50855	7.86773	23022	9.74238	9.93599	7.98672	9.08343	8.38783	10.7	8.80579	9.10861	8.38723	8.77356	34986
YER165W	PAB1	Poly(A) binding protein, part of the 3'-end RNA-processing complex, mediates interactions between the 5' cap structure and the 3' mRNA poly(A) tail, involved in control of poly(A) tail length, interacts with translation factor eIF-4G	106	123	110	11.078	10.1997	8.8785	8.01538	8.81213	8.91511	8.8125	9.17681	8.75688	8.25573	235027	10.8848	10.4143	9.03532	8.31464	8.54862	8.90398	8.56272	9.32749	8.67077	8.26393	201295	10.9766	10.2782	8.74782	8.11563	8.86136	8.99906	9.00085	9.19379	8.77768	7.96764	242857
YNL284C	MRPL10	Mitochondrial ribosomal protein of the large subunit; appears as two protein spots (YmL10 and YmL18) on two-dimensional SDS gels	8	10	8	8.76917	15.6512	8.18736	7.54717	7.47054	9.93942	8.55776	9.18792	7.89882	7.68207	25004.3	8.98072	15.194	8.32135	7.67932	7.78583	9.67341	8.60814	9.28431	8.11144	7.27128	29078.3	8.42919	15.6755	7.97544	7.30098	7.66734	10.0806	8.51489	9.36942	7.99556	7.92147	29307.4
YMR145C	NDE1	Mitochondrial external NADH dehydrogenase, a type II NAD(P)H:quinone oxidoreductase that catalyzes the oxidation of cytosolic NADH; Nde1p and Nde2p provide cytosolic NADH to the mitochondrial respiratory chain	14	20	16	6.50831	9.70761	8.15098	8.55641	10.0707	9.45237	12.2507	9.68705	8.46089	8.0518	45740.5	6.73922	9.49366	8.44031	8.37937	10.0252	9.13681	12.2204	9.96897	8.47821	8.02798	52231.3	6.49919	9.53992	8.38282	8.70068	9.98857	9.43115	11.8345	9.66186	8.60699	8.28053	51574.3
YNL248C	RPA49	RNA polymerase I subunit A49	26	26	27	9.00881	10.388	7.90237	8.52856	7.80911	11.7261	7.61264	8.62399	9.12026	10.2239	92814.4	8.82729	10.0259	7.8423	8.31172	7.70187	12.3257	8.31184	8.68519	9.13715	9.722	58550.9	8.71863	9.77624	7.91385	8.39027	7.77589	12.3582	8.1807	8.47081	9.18784	10.1481	78723.7
YGL001C	ERG26	C-3 sterol dehydrogenase, catalyzes the second of three steps required to remove two C-4 methyl groups from an intermediate in ergosterol biosynthesis	16	13	13	8.94809	7.23673	10.6816	9.2574	11.0058	7.93685	9.64487	8.47941	8.99135	8.71237	32992	8.66644	6.59956	10.8225	10.295	10.7374	7.90095	9.62208	8.67027	8.92013	8.65992	32070.7	8.69186	7.10782	10.5538	9.082	10.9677	7.9047	10.0464	8.44047	9.32925	8.79072	29364.4
YBR177C	EHT1	Acyl-coenzymeA:ethanol O-acyltransferase that plays a minor role in medium-chain fatty acid ethyl ester biosynthesis; possesses short-chain esterase activity; localizes to lipid particles and the mitochondrial outer membrane	17	17	21	8.65202	6.59384	11.797	7.26278	10.1965	9.78409	8.94822	9.33683	9.2502	9.10439	30380.8	8.24816	6.38273	11.8147	7.648	9.91718	9.73521	9.29803	9.2003	9.24692	9.4205	38611.4	8.19928	6.25253	12.4926	7.58602	10.2215	9.4385	9.17061	9.29317	9.19894	9.09056	43612.6
YIL136W	OM45	Protein of unknown function, major constituent of the mitochondrial outer membrane; located on the outer (cytosolic) face of the outer membrane	12	18	15	6.55829	8.43883	9.29497	14.325	9.70865	4.46293	10.9962	9.84965	9.43162	7.77579	24862.2	6.52539	8.55212	9.67975	14.6	9.75235	3.61528	11.9762	10.1835	9.40264	6.5834	36453.3	6.25079	8.36816	9.67111	14.1018	9.70821	4.09552	11.9143	10.0058	9.49254	7.23381	41135.1
YIL130W	ASG1	Zinc cluster protein proposed to function as a transcriptional regulator involved in the stress response; null mutants have a respiratory deficiency, calcofluor white sensitivity and slightly increased cycloheximide resistance	11	11	13	7.39549	8.15341	7.53431	8.2696	7.30324	12.2717	8.45505	8.64403	9.49702	13.4571	9814.78	7.54799	8.09791	7.41046	8.45877	7.52448	11.7756	8.36534	8.52684	9.71232	13.4957	18916.1	7.18718	7.74941	7.48121	8.49163	7.2104	11.7744	8.32422	8.58669	9.73799	14.362	25681.8
YIL043C	CBR1	Microsomal cytochrome b reductase, not essential for viability; also detected in mitochondria; mutation in conserved NADH binding domain of the human ortholog results in type I methemoglobinemia	26	24	21	8.21619	11.6866	8.44665	7.66304	7.94857	9.39218	9.25516	8.84563	9.13863	10.3287	83423.6	8.44713	11.4979	8.59002	7.85109	7.94439	9.48306	9.15052	8.46992	9.33876	10.1537	54215.4	8.58492	11.3761	8.5238	8.05888	8.29801	9.21126	9.12218	8.70487	9.14583	9.88839	64666.4
YDR400W	URH1	Uridine nucleosidase (uridine-cytidine N-ribohydrolase), cleaves N-glycosidic bonds in nucleosides; involved in the pyrimidine salvage and nicotinamide riboside salvage pathways	2	4	3	9.48122	7.66558	9.82275	8.93758	9.11746	7.73583	8.61325	10.1196	9.49888	9.91998	16199.6	9.39299	6.68266	9.9609	8.35526	9.97201	7.99275	9.29915	9.84466	9.78092	9.65237	13274.3	9.43165	7.46105	10.482	8.1974	9.68615	7.89954	9.00952	9.29952	9.65205	9.79899	16827.2
YGL028C	SCW11	Cell wall protein with similarity to glucanases; may play a role in conjugation during mating based on its regulation by Ste12p	3	1	2	8.2863	11.8968	7.52609	8.00413	10.5641	9.8648	8.23084	9.64969	8.92241	7.96294	4076.13	9.06977	11.7733	7.37674	8.60536	11.211	10.0433	7.81992	9.28766	8.1817	7.51804	1893.99	8.24543	11.9925	7.34771	8.25117	9.83185	10.9726	8.0044	9.97316	8.64028	7.6751	2770.5
YBR222C	PCS60	Peroxisomal protein that binds AMP and mRNA, localizes to both the peroxisomal peripheral membrane and matrix, expression is highly inducible by oleic acid, similar to E. coli long chain acyl-CoA synthetase	19	21	21	9.02227	5.36611	13.2995	10.4227	10.7228	5.47393	9.97624	8.30891	9.11206	9.16905	48482.5	9.11071	5.20618	13.1733	10.7428	10.6391	5.07727	9.53538	8.58231	9.35105	9.50281	61795.2	8.57209	5.61775	13.1093	10.7157	10.7159	5.42391	9.38351	8.51824	9.31157	9.51901	62123.4
YOL087C	YOL087C	Putative protein of unknown function; green fluorescent protein (GFP)-fusion protein localizes to the cytoplasm; deletion mutant is sensitive to various chemicals including phenanthroline, sanguinarine, and nordihydroguaiaretic acid	14	9	11	7.35514	8.75016	11.212	10.1631	8.7924	8.17021	9.6844	8.78826	8.90546	9.072	20630.1	7.57781	8.6189	11.2272	10.7611	8.55058	8.48158	8.71999	8.86027	8.9102	9.17241	30388.4	7.89475	8.25799	10.7293	9.57135	8.10581	7.9809	9.31576	8.92739	9.90746	10.2051	21047.7
YOR217W	RFC1	Subunit of heteropentameric Replication factor C (RF-C), which is a DNA binding protein and ATPase that acts as a clamp loader of the proliferating cell nuclear antigen (PCNA) processivity factor for DNA polymerases delta and epsilon	21	23	23	8.47271	7.84339	8.10387	10.0446	8.46607	10.0951	9.69252	8.5022	9.37281	10.3344	44711.8	8.34331	8.00282	8.06164	9.74576	8.66822	10.2109	9.71534	8.15066	9.50478	10.4953	54740.4	8.29025	7.93587	8.49777	9.78464	8.85016	9.62929	9.88948	8.353	9.26681	10.3999	74528.5
YHR008C	SOD2	Mitochondrial manganese superoxide dismutase, protects cells against oxygen toxicity; phosphorylated	9	17	12	9.61437	12.7489	9.28071	9.20861	9.81918	7.22343	8.29569	9.05399	8.07264	7.5492	9134.81	9.10816	13.5843	9.82411	8.42871	9.39511	7.02292	9.27977	8.67432	8.06915	7.5382	28367.5	10.1126	13.1785	8.97702	8.59505	9.83834	6.98598	9.54814	8.88898	8.02236	6.76435	22381.1
YLL027W	ISA1	Mitochondrial matrix protein involved in biogenesis of the iron-sulfur (Fe/S) cluster of Fe/S proteins, isa1 deletion causes loss of mitochondrial DNA and respiratory deficiency; depletion reduces growth on nonfermentable carbon sources	4	2	2	8.25944	13.4656	8.10317	7.61683	10.0622	9.33686	8.03633	8.70422	9.25702	8.06081	3133.04	9.25651	16.2097	8.72804	8.46342	8.37788	9.36139	7.16314	8.38842	7.46644	7.48135	2778.64	8.73687	17.238	8.48408	7.96944	8.64862	9.99049	8.38104	7.85437	6.64808	6.97431	3746.92
YGR094W	VAS1	Mitochondrial and cytoplasmic valyl-tRNA synthetase	86	90	90	10.0469	4.3411	9.49521	10.3467	8.05809	10.0808	9.71318	8.93791	9.52319	10.3915	239189	10.0741	4.51315	9.29314	10.0725	8.33429	9.66111	10.4324	9.29815	9.562	9.66993	291073	10.2704	4.63331	9.75921	9.90368	8.37727	9.49273	10.1582	8.99708	9.47993	9.8252	275167
YLR027C	AAT2	Cytosolic aspartate aminotransferase, involved in nitrogen metabolism; localizes to peroxisomes in oleate-grown cells	31	30	30	9.36531	8.7657	9.27172	9.28895	10.0566	8.2362	9.33792	9.9136	9.07948	7.57508	61365.6	9.17023	8.60383	9.61351	9.26589	10.3194	7.85202	10.0106	9.51065	9.12971	7.43228	55753.4	9.61471	8.34954	9.16499	9.35731	10.0715	8.10037	10.2164	9.65851	9.03859	7.33942	71064
YGR116W	SPT6	Transcription elongation factor required for the maintenance of chromatin structure during transcription in order to inhibit transcription from promoters within the coding region	56	56	62	6.96902	4.82536	8.81532	8.62464	8.29565	8.92014	9.85958	8.33799	11.4312	14.8982	158400	6.7218	4.70223	8.71503	8.92381	8.19297	9.43199	9.36704	8.83488	11.3028	14.7434	133532	6.68652	4.55376	8.80972	8.97355	8.08208	9.22852	9.17802	8.76384	11.453	15.1639	150556
YCR037C	PHO87	Low-affinity inorganic phosphate (Pi) transporter, involved in activation of PHO pathway; expression is independent of Pi concentration and Pho4p activity; contains 12 membrane-spanning segments	6	6	7	8.49281	10.8144	7.23917	10.6574	6.41542	15.6209	10.8945	2.90984	4.60535	13.2961	7160.4	7.90739	10.8239	7.59649	10.633	5.91009	16.861	11.3861	2.36661	4.0409	13.3263	19302.2	8.55403	9.95958	8.30684	11.0957	6.06036	16.2659	10.9318	1.85319	4.07489	13.774	8311
YJL198W	PHO90	Low-affinity phosphate transporter; deletion of pho84, pho87, pho89, pho90, and pho91 causes synthetic lethality; transcription independent of Pi and Pho4p activity; overexpression results in vigorous growth	7	6	9	8.70354	10.7926	10.0148	8.55244	6.64909	12.4227	9.17947	5.39099	7.44015	11.7925	10563.7	8.51175	10.5073	10.219	8.6071	6.84131	12.7257	8.97834	5.47671	7.75051	11.2709	4220.94	8.60628	10.0623	9.65904	8.30891	6.80483	14.1844	9.73317	5.5349	8.35309	9.6766	14399.3
YDR341C	YDR341C	Arginyl-tRNA synthetase, proposed to be cytoplasmic but the authentic, non-tagged protein is detected in highly purified mitochondria in high-throughput studies	77	76	74	8.66428	7.83376	8.90143	9.87543	8.35537	10.4778	9.09962	8.45013	9.39454	9.87613	167965	8.82149	7.80646	9.08309	9.78973	8.38008	10.1148	9.53933	8.47031	9.36142	9.52726	193143	8.90222	8.03913	9.15376	9.42188	8.6667	9.92241	9.58303	8.71435	9.10811	9.3947	199172
YGL207W	SPT16	Subunit of the heterodimeric FACT complex (Spt16p-Pob3p), which associates with chromatin via interaction with Nhp6Ap and Nhp6Bp, and reorganizes nucleosomes to facilitate access to DNA by RNA and DNA polymerases	43	46	49	8.50257	6.15534	8.95958	8.39566	9.13034	9.25434	9.09502	9.27678	10.1163	12.0638	94064.7	8.01653	5.79929	8.8371	8.56027	9.16793	9.15755	9.61899	9.33646	10.1618	12.2785	83824.4	8.41225	5.972	8.59564	8.48936	9.15953	9.22362	9.52061	9.21949	10.2449	12.0725	93574.5
YHR091C	MSR1	Mitochondrial arginyl-tRNA synthetase	1	0	1	8.82591	13.2939	7.49788	7.57439	8.27039	10.6596	9.69495	8.78357	8.1125	8.19252	1634.19	8.98625	12.6708	8.49597	8.51773	9.22668	9.8024	9.97666	8.20693	7.29465	7.72518	0	0	0	0	0	0	0	0	0	0	0	2682.3
YOL013C	HRD1	Ubiquitin-protein ligase required for endoplasmic reticulum-associated degradation (ERAD) of misfolded proteins; genetically linked to the unfolded protein response (UPR); regulated through association with Hrd3p; contains an H2 ring finger	5	2	3	6.64516	8.43019	8.16533	11.0885	7.99444	8.99224	9.68028	9.57019	9.43607	10.9183	8086.35	7.36569	8.56677	9.4342	10.4067	8.76242	8.10284	11.0193	8.61846	9.19737	9.4277	3163.16	5.88658	9.0882	10.2863	9.95106	9.21994	8.99534	10.6531	8.75658	8.8147	9.25407	5190.96
YBL034C	STU1	Component of the mitotic spindle that binds to interpolar microtubules via its association with beta-tubulin (Tub2p); required for interpolar microtubules to provide an outward force on the spindle poles	4	7	10	6.58231	7.94272	7.71952	8.71971	8.23922	9.42962	9.00676	9.11181	10.6042	13.6074	2686.88	6.35726	7.54233	6.95983	8.35673	8.817	10.4511	9.15032	8.44053	11.096	13.7513	10087.3	6.35414	6.56317	7.57484	8.56855	9.65874	8.91212	8.5194	11.2757	11.9102	11.5794	16024.2
YAL036C	RBG1	Member of the DRG family of GTP-binding proteins; associates with translating ribosomes; interacts with Tma46p, Ygr250cp, Gir2p and Yap1p via two-hybrid	25	31	34	9.42907	10.7041	8.92905	9.45549	7.93996	10.0727	8.52601	8.24119	8.48631	9.125	81492	9.69931	11.0173	8.6361	9.44778	7.51861	10.6925	8.44516	8.24951	8.13592	9.05165	64989.5	9.26467	11.2148	8.95152	9.24041	7.83601	10.287	8.51499	8.31563	8.15689	9.12288	71243.6
YGR173W	RBG2	Protein with a role in translation; forms a complex with Gir2p; has similarity to mammalian developmentally regulated GTP-binding protein	23	17	19	9.65322	12.6151	7.68087	9.53208	7.68911	10.0125	8.19138	8.53074	7.99713	9.00006	48067.4	9.76788	12.4576	8.04197	9.25027	8.12693	9.50636	8.32227	7.98625	8.2838	9.16382	68275.4	10.218	13.078	7.83022	8.99208	7.9988	9.43165	8.84275	7.96346	8.28608	8.25988	65052.8
YDR432W	NPL3	RNA-binding protein that promotes elongation, regulates termination, and carries poly(A) mRNA from nucleus to cytoplasm; required for pre-mRNA splicing; dissociation from mRNAs promoted by Mtr10p; phosphorylated by Sky1p in the cytoplasm	16	16	18	9.60636	8.14207	9.68386	11.1138	8.14436	9.12116	7.26602	7.56292	9.64849	10.6309	47257.9	10.218	7.68558	9.16714	11.2405	7.7069	9.58203	6.83427	7.83182	9.72391	10.8977	43740.3	9.27877	8.16751	9.81452	11.4226	8.01346	9.58663	7.03233	7.53098	9.59424	10.4309	56495.6
##YER070W	####RNR1	##Major isoform of the large subunit of ribonucleotide-diphosphate reductase; the RNR complex catalyzes rate-limiting step in dNTP synthesis, regulated by DNA replication and DNA damage checkpoint pathways via localization of small subunits	1	1	1	10.3522	8.44204	6.76717	10.1858	6.29797	12.64	2.24077	3.73618	11.6284	18.7444	3955.81	11.2986	8.50058	7.42398	9.80246	5.92015	12.1003	2.12784	3.56752	12.461	17.7088	2429.59	10.0934	8.43624	6.89446	10.7171	6.33735	12.575	2.30686	3.55483	11.9746	17.9555	5767.35
YLL032C	YLL032C	Protein of unknown function that may interact with ribosomes, based on co-purification experiments; green fluorescent protein (GFP)-fusion protein localizes to the cytoplasm; YLL032C is not an essential gene	4	13	13	8.16595	8.83632	8.47016	8.78124	11.079	8.78364	10.2316	8.73014	8.92856	8.89621	14738.3	7.79084	9.1075	8.33778	9.43815	10.3409	9.69103	9.83621	8.77509	8.47871	9.09576	24393.4	8.03555	9.20206	8.0754	9.27145	10.0563	9.66659	9.56852	9.37419	8.65231	9.01222	20159.9
YGL173C	XRN1	Evolutionarily-conserved 5'-3' exonuclease component of cytoplasmic processing (P) bodies involved in mRNA decay; plays a role in microtubule-mediated processes, filamentous growth, ribosomal RNA maturation, and telomere maintenance	72	76	73	8.90149	5.38407	9.69399	8.66934	10.4842	8.13147	10.1944	9.8004	9.93911	9.72062	181531	9.19121	5.25029	10.1339	8.66625	10.5141	7.94266	10.0386	9.60403	9.96559	9.62317	243534	9.07785	5.18953	10.1648	8.85365	9.97516	7.92177	10.3348	9.85656	9.89572	9.64423	270592
YOR048C	RAT1	Nuclear 5' to 3' single-stranded RNA exonuclease, involved in RNA metabolism, including rRNA and snRNA processing as well as poly (A+) dependent and independent mRNA transcription termination	23	22	18	6.71795	6.07351	7.37468	8.80562	7.4939	12.031	9.00394	8.13721	10.7326	14.6267	37909.4	6.4113	5.55699	7.5518	9.03362	7.11705	12.0313	8.76456	8.07832	10.7569	15.6127	44364.2	6.36499	5.41036	7.35086	8.92524	7.07745	11.877	8.59729	8.0057	10.7876	16.497	46101.1
YNL197C	WHI3	RNA binding protein that sequesters CLN3 mRNA in cytoplasmic foci; cytoplasmic retention factor for Cdc28p and associated cyclins; regulates cell fate and dose-dependently regulates the critical cell size required for passage through Start	8	9	10	8.90681	10.9045	8.61119	9.44375	8.34191	9.91107	8.56988	8.68317	8.9598	8.57515	10336.5	9.37523	11.8365	8.70973	9.35157	7.69065	9.66853	8.3313	9.01336	8.4465	8.47516	11791.6	8.864	11.8704	8.59431	9.28036	8.18065	9.77247	8.43413	9.20896	8.41417	8.28816	9479.99
YOR124C	UBP2	Ubiquitin-specific protease that removes ubiquitin from ubiquitinated proteins; interacts with Rsp5p and is required for MVB sorting of membrane proteins; can cleave polyubiquitin and has isopeptidase activity	27	28	26	7.22475	5.53905	10.2367	9.40374	10.3623	8.57081	10.1487	9.48689	9.57577	10.3733	53067.6	7.09451	4.5356	10.8222	9.35073	10.9454	7.33729	10.5796	9.44021	10.4596	10.3525	48607.2	7.21807	4.7146	10.4668	9.54191	10.5761	7.49922	10.4495	9.59901	10.6632	10.1789	47944.3
YHR186C	KOG1	Subunit of TORC1, a rapamycin-sensitive complex involved in growth control that contains Tor1p or Tor2p, Lst8p and Tco89p; contains four HEAT repeats and seven WD-40 repeats; may act as a scaffold protein to couple TOR and its effectors	13	23	21	8.01429	8.03866	8.88601	9.65532	8.97864	9.16886	9.52874	9.79813	8.96932	9.87835	24875.9	7.87088	6.95003	9.03713	9.47719	9.87001	9.36958	9.76425	9.18073	9.33432	10.0479	32129	8.29864	7.0969	9.08867	9.23257	9.53099	9.59134	9.73816	8.93553	9.42692	9.97087	25141.8
YGL043W	DST1	General transcription elongation factor TFIIS, enables RNA polymerase II to read through blocks to elongation by stimulating cleavage of nascent transcripts stalled at transcription arrest sites	18	21	25	9.4267	12.8218	8.65674	9.40776	8.64068	9.24802	8.6124	8.16633	8.15235	7.75146	39967	10.006	12.6957	8.90061	9.14625	8.31323	8.86454	8.81351	8.12785	8.13334	7.90645	82196	9.72197	12.9624	8.72443	9.15837	8.20398	9.07259	8.49942	8.2035	8.12994	8.22518	75464.3
YML078W	CPR3	Mitochondrial peptidyl-prolyl cis-trans isomerase (cyclophilin), catalyzes the cis-trans isomerization of peptide bonds N-terminal to proline residues; involved in protein refolding after import into mitochondria	14	16	17	10.5126	10.5964	9.35308	10.8541	9.04152	7.27303	8.33002	7.84004	9.19304	7.8798	28168.8	10.6347	10.8492	9.45194	8.73367	9.5909	7.21721	9.14895	8.80297	9.01283	7.48534	36464	10.7908	11.4237	9.93881	8.43803	9.92076	7.01767	9.30191	8.52473	8.72064	6.8364	42730.7
YDR155C	CPR1	Cytoplasmic peptidyl-prolyl cis-trans isomerase (cyclophilin), catalyzes the cis-trans isomerization of peptide bonds N-terminal to proline residues; binds the drug cyclosporin A	41	54	40	8.87873	12.5166	9.66008	9.34244	9.84531	7.91917	8.44226	8.56836	8.7517	6.94667	82087.5	9.3272	12.7912	9.50457	9.46052	9.49501	7.69697	8.75391	8.95274	8.47842	6.43556	124925	9.38749	12.5462	10.0238	8.56686	9.94166	7.63588	8.81849	8.84397	8.57555	6.57877	93382
YLL013C	PUF3	Protein of the mitochondrial outer surface, links the Arp2/3 complex with the mitochore during anterograde mitochondrial movement; also binds to and promotes degradation of mRNAs for select nuclear-encoded mitochondrial proteins	20	23	20	8.92391	9.34586	10.954	9.86236	9.27831	8.03447	8.97794	8.62524	8.62526	8.25707	39722.1	8.60289	9.05484	11.301	9.74246	9.3174	7.90877	9.14882	8.51513	9.01889	8.28722	65782.2	8.52052	8.67874	11.1636	10.571	8.74496	8.68863	8.14198	7.95345	9.22836	9.19861	56987.2
YLR216C	CPR6	Peptidyl-prolyl cis-trans isomerase (cyclophilin), catalyzes the cis-trans isomerization of peptide bonds N-terminal to proline residues; binds to Hsp82p and contributes to chaperone activity	30	33	29	9.55781	10.9169	9.39788	12.5623	7.94746	7.39135	9.945	7.11729	8.08717	7.93347	62312.1	10.4736	11.4126	9.80996	12.1491	7.73049	6.82753	10.3507	7.30901	7.59158	7.23993	93070.1	9.90821	11.2801	9.04508	12.8469	7.66307	7.14007	10.5435	6.88649	7.86423	7.66783	86127.1
YJR070C	LIA1	Deoxyhypusine hydroxylase, a HEAT-repeat containing metalloenzyme that catalyzes hypusine formation; binds to and is required for the modification of Hyp2p (eIF5A); complements S. pombe mmd1 mutants defective in mitochondrial positioning	32	38	48	10.5802	14.4739	7.83456	6.78594	8.24952	10.0571	7.92316	8.63807	8.57777	7.78275	102630	10.3807	14.3551	7.88161	7.35374	7.99126	10.3027	7.43015	8.94556	8.33809	7.93707	117980	10.3242	13.9712	7.9388	7.31478	8.13708	10.3021	7.43124	8.67079	8.68236	8.15463	102901
YMR129W	POM152	Nuclear pore membrane glycoprotein; may be involved in duplication of nuclear pores and nuclear pore complexes during S-phase;	18	22	23	6.5675	9.5254	8.12576	8.39816	6.89264	10.8028	10.3415	8.39289	8.90437	13.0017	40208.5	6.73856	9.26855	8.51645	8.19776	7.21743	10.5483	9.94129	8.29709	9.50736	12.6922	40532.2	6.88307	9.64382	8.35744	8.45464	7.15807	10.7212	9.74813	8.46243	8.92504	12.5536	65468.7
YOR270C	VPH1	Subunit a of vacuolar-ATPase V0 domain, one of two isoforms (Vph1p and Stv1p); Vph1p is located in V-ATPase complexes of the vacuole while Stv1p is located in V-ATPase complexes of the Golgi and endosomes	32	43	43	8.46427	8.9952	9.65988	8.60404	6.99641	9.91829	9.42866	10.1397	9.51297	9.20402	75420.9	8.77358	8.95122	10.0036	8.37353	6.91996	9.7561	9.46233	10.2243	9.54579	8.90509	77880.5	8.85866	8.98052	9.94491	8.48991	7.07166	9.67635	9.50427	9.94352	9.53146	8.91446	88476.9
YBL042C	FUI1	High affinity uridine permease, localizes to the plasma membrane; also mediates low but significant transport of the cytotoxic nucleoside analog 5-fluorouridine; not involved in uracil transport	6	7	6	11.232	12.7244	10.8989	11.0145	8.71366	7.19959	10.2165	6.64292	6.25703	5.92545	7127.39	10.3082	12.9876	11.8141	11.4654	8.36687	7.55279	9.55026	6.78532	5.90745	6.14049	8235.39	10.6439	12.3193	12.0466	10.6954	8.54286	7.82806	9.46987	6.59878	6.36273	6.37918	8199.01
YBR087W	RFC5	Subunit of heteropentameric Replication factor C (RF-C), which is a DNA binding protein and ATPase that acts as a clamp loader of the proliferating cell nuclear antigen (PCNA) processivity factor for DNA polymerases delta and epsilon	8	11	8	7.14317	8.95884	8.01218	7.62675	8.63905	11.9519	8.55393	8.92736	9.93781	11.213	11470.3	6.54628	9.40835	7.69897	7.34364	8.3903	11.6073	9.62428	8.4884	9.95178	11.8547	17727	6.93233	8.58816	8.05831	7.77492	8.01242	11.8977	8.2	8.45314	10.2601	12.7453	18972.8
YPL091W	GLR1	Cytosolic and mitochondrial glutathione oxidoreductase, converts oxidized glutathione to reduced glutathione; mitochondrial but not cytosolic form has a role in resistance to hyperoxia	28	27	35	11.1133	7.79876	8.46899	9.08964	9.69944	8.54501	10.2735	9.44618	8.63669	7.82111	73658.4	10.718	7.57171	8.76936	9.05259	10.1973	8.46053	9.97639	9.6994	8.79186	7.68309	67339.3	10.5616	7.95404	8.74699	9.18451	10.1661	7.87227	10.5846	9.65594	8.87245	7.31207	91470.9
YHL030W	ECM29	Scaffold protein that assists in association of the proteasome core particle with the regulatory particle; degraded by the mature proteasome after assembly; contains HEAT-like repeats	28	40	38	6.66647	7.16113	9.28429	8.71855	10.0633	8.49889	9.9721	9.04899	10.7516	10.7666	39991.7	6.52043	7.42272	8.73968	8.87713	9.93253	8.84903	10.1	9.25514	10.3929	10.8222	71543.1	6.70318	7.32193	8.88353	8.5786	9.9609	8.60014	10.105	9.29256	10.4851	10.9842	58289.5
YNL307C	MCK1	Protein serine/threonine/tyrosine (dual-specificity) kinase involved in control of chromosome segregation and in regulating entry into meiosis; related to mammalian glycogen synthase kinases of the GSK-3 family	16	23	24	9.08241	8.13549	8.87423	8.99971	8.76767	9.36837	8.89436	8.69813	9.9784	10.1291	37411.2	8.76215	7.97485	8.59805	8.99066	8.73559	10.2078	8.7977	8.86921	9.54493	10.4257	50819	9.0413	8.11533	8.89574	9.4401	8.58031	9.9775	8.62773	8.52187	9.34862	10.3532	77079
YGL231C	EMC4	Member of a transmembrane complex required for efficient folding of proteins in the ER; null mutant displays induction of the unfolded protein response; human ortholog TMEM85 may function in apoptosis	12	10	17	7.63474	9.7608	9.59469	9.22931	8.7892	9.13047	10.5362	7.82334	9.09291	9.31213	23015.6	7.73978	9.54537	9.51353	9.004	8.75753	8.92832	10.3859	7.99313	9.73463	9.30444	22707	7.87773	9.3964	9.71749	9.09723	8.86893	8.92124	10.7333	7.86166	8.97101	9.46129	41241.2
YJL109C	UTP10	Nucleolar protein, component of the small subunit (SSU) processome containing the U3 snoRNA that is involved in processing of pre-18S rRNA; mutant has increased aneuploidy tolerance	48	50	49	7.21188	7.89886	7.04322	7.62464	7.2036	13.7346	8.15703	8.11255	9.38749	14.6311	98015.3	6.84415	8.03119	6.92387	7.59407	7.06585	14.1692	7.70555	8.1587	9.51093	14.9035	117181	7.03397	7.82036	7.29164	7.64182	7.34525	13.6284	7.91645	7.7823	9.66683	14.7939	150051
YGR123C	PPT1	Protein serine/threonine phosphatase with similarity to human phosphatase PP5; present in both the nucleus and cytoplasm; expressed during logarithmic growth; computational analyses suggest roles in phosphate metabolism and rRNA processing	21	29	28	9.8504	7.04467	7.99008	8.73225	9.60701	10.7153	9.58598	8.8159	9.15299	9.43682	40309.4	9.56715	6.85908	8.69506	8.76502	9.09176	11.2841	9.22636	8.53939	9.13922	9.73289	64328.5	9.60269	6.88655	8.56966	8.53383	9.06089	11.1541	9.06609	8.8548	9.00916	10.1828	68429
YGR253C	PUP2	Alpha 5 subunit of the 20S proteasome involved in ubiquitin-dependent catabolism; human homolog is subunit zeta	19	15	15	9.4479	12.1025	9.27611	8.7596	8.50405	9.20372	8.14	9.11254	8.45466	7.89186	42040.2	10.2348	11.7217	9.73528	8.18663	8.42791	9.21502	8.45422	8.86207	8.58694	7.48742	20271.3	9.93437	12.1046	10.8053	8.65843	8.42809	8.64548	8.37303	8.97151	8.31467	6.68189	35015
Q0250	COX2	Subunit II of cytochrome c oxidase, which is the terminal member of the mitochondrial inner membrane electron transport chain; one of three mitochondrially-encoded subunits	6	7	6	5.94104	22.4372	5.48129	5.79564	7.22897	12.7873	7.71491	8.99629	7.52898	6.99327	7126.85	6.38747	19.2846	6.32596	6.61808	7.32562	11.9359	7.52777	10.2798	7.53798	7.66537	12190.5	5.72792	23.1613	5.30188	5.33742	7.04569	13.163	7.65371	9.35912	7.18696	7.02774	6795.9
YPR105C	COG4	Essential component of the conserved oligomeric Golgi complex (Cog1p through Cog8p), a cytosolic tethering complex that functions in protein trafficking to mediate fusion of transport vesicles to Golgi compartments	15	15	17	8.17881	7.47793	8.73415	8.40878	9.54021	9.77415	8.87543	10.0516	9.87792	10.0173	23128.8	8.17606	7.40007	8.39877	8.32101	10.1207	10.0264	8.98145	9.97555	9.58242	9.92691	29598.8	8.58632	8.13435	8.68656	8.13146	10.0714	9.50984	8.99427	9.60296	9.76955	9.4401	24448.3
YDR135C	YCF1	Vacuolar glutathione S-conjugate transporter of the ATP-binding cassette family, has a role in detoxifying metals such as cadmium, mercury, and arsenite; also transports unconjugated bilirubin; similar to human cystic fibrosis protein CFTR	33	42	43	7.57938	7.00368	9.75005	9.18017	9.04434	9.115	9.76401	9.38159	9.51874	10.5899	66082	7.69769	6.88599	10.1716	9.14238	9.07358	9.161	9.72297	9.13826	9.49794	10.4179	97163.8	8.21923	6.90884	9.92598	8.94413	9.1108	8.85244	9.97772	9.05316	9.57283	10.345	106454
YLL015W	BPT1	ABC type transmembrane transporter of MRP/CFTR family, found in vacuolar membrane, involved in the transport of unconjugated bilirubin and in heavy metal detoxification via glutathione conjugates, along with Ycf1p	10	19	17	7.37171	7.87253	8.86304	9.0881	9.36182	9.22305	10.4689	8.47961	9.62564	10.5702	21707.8	6.97886	7.58638	9.12807	9.35123	9.69776	9.26066	10.4113	8.60518	9.49325	10.3901	30441.7	7.08075	8.10841	9.55126	9.83201	8.95785	9.5053	10.2482	8.78635	8.78877	10.0444	37345.9
YPL023C	MET12	Protein with methylenetetrahydrofolate reductase (MTHFR) activity in vitro; null mutant has no phenotype and is prototrophic for methionine; MET13 encodes major isozyme of MTHFR	10	12	13	8.95651	7.9262	9.61042	8.86535	9.12332	8.75861	9.06837	10.5408	8.39502	9.66696	30000.6	8.23959	7.65661	9.46194	8.44714	9.86643	8.10745	11.2671	9.17552	8.89709	9.8162	42067	9.31131	7.16233	9.03419	8.22663	9.49469	8.75873	11.4269	8.94658	9.57246	8.98566	33975.5
YGL129C	RSM23	Mitochondrial ribosomal protein of the small subunit, has similarity to mammalian apoptosis mediator proteins; null mutation prevents induction of apoptosis by overproduction of metacaspase Mca1p	18	19	16	8.79128	12.1417	8.27266	8.05386	8.54735	10.1609	8.93512	9.26648	8.56606	8.17121	28527	8.76421	12.5907	8.94957	8.5117	8.06687	10.2737	8.68413	9.34237	7.98278	7.7287	38473.4	9.05105	11.8952	8.9708	8.51819	8.15355	9.78356	8.70052	9.32798	8.38753	8.12954	39668.2
YDR492W	IZH1	Membrane protein involved in zinc ion homeostasis, member of the four-protein IZH family; transcription is regulated directly by Zap1p, expression induced by zinc deficiency and fatty acids; deletion increases sensitivity to elevated zinc	5	3	7	7.51361	19.755	7.02639	7.88484	6.99053	10.7284	8.36072	6.69895	7.21131	8.71913	6067.36	7.75885	13.3421	8.14735	7.6508	9.53649	9.92575	9.4138	7.3308	7.74121	10.0697	5989.45	8.17465	17.9277	7.60282	8.29366	7.43744	9.95286	8.13178	7.55561	6.8111	9.02092	13971.3
YDR194C	MSS116	DEAD-box protein required for efficient splicing of mitochondrial Group I and II introns; non-polar RNA helicase that also facilities strand annealing	29	29	29	9.36861	10.2915	8.56749	9.39679	8.68903	9.56508	8.77381	9.10232	8.60985	8.53883	77103.8	9.48421	10.0408	8.69767	9.32535	8.84737	9.51669	8.6772	9.03583	8.82546	8.44868	90721.2	9.49702	9.96407	8.64735	9.06861	8.69557	9.4837	9.32112	8.97423	8.87321	8.38452	72998
YPL176C	TRE1	Plasma membrane protein that binds to Bsd2p and regulates ubiquitylation and vacuolar degradation of the metal transporter Smf1p; function is redundant with that of Tre2p; has similarity to transferrin receptors	3	1	3	9.09789	11.6638	7.2008	10.6638	7.74395	10.1715	9.42284	7.48165	7.53884	9.91675	1710.37	7.0706	10.921	5.16066	12.0665	7.2753	12.2101	9.87281	6.20763	9.01276	11.0537	1099.79	7.54575	11.3584	3.88002	11.8	7.83652	12.7211	10.5786	6.09371	9.24598	9.80837	3240.19
YOR239W	ABP140	AdoMet-dependent tRNA methyltransferase and actin binding protein; C-terminal domain is responsible for 3-methylcytidine modification of residue 32 of the tRNA anticodon loop of tRNA-Thr and tRNA-Ser and contains an S-adenosylmethionine (AdoMet) binding motif; N-terminal actin binding sequence interacts with actin filaments and localizes to actin patches and cables; N- and C-terminal domains are …	18	16	19	9.01796	8.36428	9.42106	9.68019	8.74238	9.57638	8.75397	9.28889	8.75309	9.31486	34037.6	9.56025	7.84002	10.0067	8.92993	8.80282	9.12878	8.89913	9.34504	9.18027	9.22075	54343.1	9.34177	7.9327	9.87186	9.28881	8.93343	9.31324	8.59371	9.18426	8.93593	9.51234	71361.7
YMR303C	ADH2	Glucose-repressible alcohol dehydrogenase II, catalyzes the conversion of ethanol to acetaldehyde; involved in the production of certain carboxylate esters; regulated by ADR1	2	3	4	9.12947	14.8116	6.13961	6.17882	8.93651	5.55048	9.0548	12.1764	7.97978	10.9344	4210.51	8.56084	16.5656	4.79509	5.36275	10.2062	4.90293	10.1925	11.5682	7.477	11.398	2891.01	9.39016	14.3885	4.402	5.49324	10.9075	5.22044	11.2929	11.1281	7.55166	11.1562	10855.7
YBR145W	ADH5	Alcohol dehydrogenase isoenzyme V; involved in ethanol production	4	6	7	11.0596	9.43897	8.58525	7.56657	10.7645	9.03846	8.58143	8.76218	8.64004	8.46843	12733.3	11.1274	7.39262	9.81938	8.07149	11.0199	8.1521	8.75675	9.53376	9.10298	7.95318	20759.1	11.6417	7.45115	10.3064	7.89842	11.2476	7.92687	8.43925	9.23935	8.88585	7.89277	21791.6
YOL086C	ADH1	Alcohol dehydrogenase, fermentative isozyme active as homo- or heterotetramers; required for the reduction of acetaldehyde to ethanol, the last step in the glycolytic pathway	142	200	151	10.169	7.20814	10.0782	8.83305	11.0456	7.52526	9.01505	8.96635	9.83148	8.22477	323460	9.82294	7.37252	9.4226	9.11509	10.9214	7.68901	9.22501	9.37016	9.63066	8.34786	390125	9.92423	7.368	9.02647	9.01326	10.6455	7.76592	9.39681	9.56287	10.0002	8.20896	345573
YMR083W	ADH3	Mitochondrial alcohol dehydrogenase isozyme III; involved in the shuttling of mitochondrial NADH to the cytosol under anaerobic conditions and ethanol production	29	30	25	9.9733	9.96437	11.2111	10.994	8.11169	7.67998	9.65974	8.63527	8.08495	6.54312	82803.5	9.82903	9.72496	10.8085	12.0038	7.81092	7.55824	8.76446	8.99833	8.50968	6.86706	88325.9	10.0595	9.65773	10.9263	11.332	8.20919	7.81127	9.21915	8.35493	8.51152	6.79776	88988.4
YDR488C	PAC11	Dynein intermediate chain, acts in the cytoplasmic dynein pathway, forms cortical cytoplasmic microtubule capture site with Num1p; null mutant is defective in nuclear migration, essential in the absence of CIN8	1	1	1	7.95126	8.83862	7.54357	8.92268	11.2993	9.47863	9.34151	9.08478	8.98063	9.47574	444.299	8.51925	8.49024	8.58382	7.75763	11.1692	10.2324	9.22952	9.0314	9.43821	8.44948	241.557	7.67859	10.9785	9.86362	7.08485	8.89838	8.49719	7.9206	9.55781	9.7594	10.6903	234.888
YJL207C	LAA1	AP-1 accessory protein; colocalizes with clathrin to the late-Golgi apparatus; involved in TGN-endosome transport; physically interacts with AP-1; similar to the mammalian p200; may interact with ribosomes; YJL207C is a non-essential gene	23	22	29	7.09092	8.55879	8.09246	8.79016	9.7997	9.22955	9.43032	10.0559	10.1024	9.77712	35141.7	7.76802	8.41647	8.32676	8.54102	9.57153	9.37591	9.16578	9.84224	10.0244	9.87888	30441.6	7.95973	8.72583	8.06225	8.44017	9.77769	9.44733	9.12484	9.80513	9.68536	9.89225	40761.9
YPL028W	ERG10	Acetyl-CoA C-acetyltransferase (acetoacetyl-CoA thiolase), cytosolic enzyme that transfers an acetyl group from one acetyl-CoA molecule to another, forming acetoacetyl-CoA; involved in the first step in mevalonate biosynthesis	32	44	47	10.4683	10.1138	9.82293	9.16069	8.71593	7.86452	10.3265	8.86716	8.25922	7.27334	84472.6	10.2232	10.6588	9.33062	9.27641	8.6354	8.10544	10.036	9.55934	7.94052	7.1516	101384	10.1138	10.3045	9.44773	9.41295	8.71338	8.08819	9.94684	9.15265	8.35712	7.366	107102
YHR072W	ERG7	Lanosterol synthase, an essential enzyme that catalyzes the cyclization of squalene 2,3-epoxide, a step in ergosterol biosynthesis	9	8	10	7.72947	5.88757	9.41198	9.74874	7.76065	11.0336	9.76542	8.77571	9.50359	11.3323	33252.5	7.57527	5.97228	9.25756	9.73291	7.69396	10.8816	10.4947	8.88754	9.97187	10.424	19607.8	7.43211	6.16197	9.47762	9.73916	7.89113	10.8772	10.7517	8.87881	9.29897	10.3967	22103.6
YOL081W	IRA2	GTPase-activating protein that negatively regulates RAS by converting it from the GTP- to the GDP-bound inactive form, required for reducing cAMP levels under nutrient limiting conditions, has similarity to Ira1p and human neurofibromin	14	14	15	7.2039	9.25832	9.25914	9.23421	8.04668	8.65992	10.4686	8.98103	9.72083	10.0814	22896	6.96917	8.97276	9.28698	9.34628	8.09086	8.48328	10.2613	9.45502	9.98104	10.0655	28956.8	7.02492	9.12031	9.17271	9.59036	8.35166	8.16326	10.449	9.2624	9.62103	10.1411	31995.3
YBR140C	IRA1	GTPase-activating protein that negatively regulates RAS by converting it from the GTP- to the GDP-bound inactive form, required for reducing cAMP levels under nutrient limiting conditions, mediates membrane association of adenylate cyclase	7	19	14	7.53252	8.69382	9.62686	9.14753	8.9811	9.22396	9.63532	9.03711	9.39866	9.63903	8976.18	7.60928	7.9631	10.8436	9.45307	8.75852	7.76966	10.1838	8.804	9.92277	9.60456	26721.9	7.32794	8.32079	10.7001	8.82398	9.56696	8.63761	10.0504	9.03952	9.08043	9.37026	24881
YLL033W	IRC19	Putative protein of unknown function; YLL033W is not an essential gene but mutant is defective in spore formation; null mutant displays increased levels of spontaneous Rad52p foci	1	2	0	7.24701	15.0296	6.99083	6.33649	9.36955	9.63022	9.48653	10.1479	9.27777	7.38679	828.112	0	0	0	0	0	0	0	0	0	0	1743.15	7.2384	16.0488	6.42027	6.3663	9.91703	11.1993	8.49141	9.04334	8.21758	8.01071	0
YGR132C	PHB1	Subunit of the prohibitin complex (Phb1p-Phb2p), a 1.2 MDa ring-shaped inner mitochondrial membrane chaperone that stabilizes newly synthesized proteins; determinant of replicative life span; involved in mitochondrial segregation	11	18	16	8.86939	11.7375	9.81379	9.78123	8.83999	8.09952	9.23496	8.94143	8.05705	7.49697	26916.8	9.22107	11.7241	10.3117	9.41877	8.49035	7.54144	9.73804	8.63182	8.59255	7.23876	47525.1	8.64172	11.8235	9.62582	9.55476	9.14125	8.04706	9.26003	8.65804	8.41014	7.74041	49076.4
YPL050C	MNN9	Subunit of Golgi mannosyltransferase complex also containing Anp1p, Mnn10p, Mnn11p, and Hoc1p that mediates elongation of the polysaccharide mannan backbone; forms a separate complex with Van1p that is also involved in backbone elongation	8	7	9	7.70947	8.9953	8.43073	9.81717	6.46033	12.052	7.30711	7.81826	9.84934	12.5271	34387.5	8.07318	9.50491	8.91735	9.31143	6.5074	11.7475	7.65208	7.77185	9.84579	11.5563	19997.9	7.88237	8.00737	8.03695	9.57588	7.22919	13.5386	6.80316	7.1633	9.9813	12.6824	48685.7
YDL131W	LYS21	Homocitrate synthase isozyme, catalyzes the condensation of acetyl-CoA and alpha-ketoglutarate to form homocitrate, which is the first step in the lysine biosynthesis pathway; highly similar to the other isozyme, Lys20p	9	10	9	10.6624	10.7396	8.66625	8.83334	10.327	7.73052	9.36872	8.67686	8.15679	7.71441	21516.2	12.4311	10.9319	8.43972	7.50702	11.3262	6.98627	10.5436	8.05566	7.9573	6.77739	34452.6	13.255	11.0326	8.67903	6.92112	11.7872	6.52322	11.5123	7.33043	7.75726	6.13143	26690.6
YDL182W	LYS20	Homocitrate synthase isozyme, catalyzes the condensation of acetyl-CoA and alpha-ketoglutarate to form homocitrate, which is the first step in the lysine biosynthesis pathway; highly similar to the other isozyme, Lys21p	8	10	9	10.9888	7.69263	9.89943	9.59347	11.9019	6.78567	11.8749	6.47225	8.66882	6.9807	25616	10.5253	8.37923	9.04384	11.0842	11.1841	7.95742	9.84632	7.39471	7.9954	7.47839	19495.3	10.5044	8.28087	9.50756	11.2822	10.8984	7.83117	9.62943	7.41326	8.03617	7.50005	25543.3
YLR197W	NOP56	Essential evolutionarily-conserved nucleolar protein component of the box C/D snoRNP complexes that direct 2'-O-methylation of pre-rRNA during its maturation; overexpression causes spindle orientation defects	39	47	44	8.89155	10.1083	8.04319	8.25738	7.82948	13.0706	8.23836	8.44641	8.46977	9.59102	107735	8.85029	9.79416	8.17957	7.78414	8.05135	13.0613	8.97841	8.11911	8.50905	9.56317	139978	9.43754	9.80791	7.52286	7.57422	7.88292	12.8644	9.79049	8.02299	8.97222	9.05741	148395
[truncated: 3,592 more rows]
